# Supplementary material for: Enantioselective synthesis of configurationally stable [5]helicenes containing 1,2-azaborine units
Source: Royal Society of Chemistry journal article supplement (doi:10.1039/d6sc02344d), 2026-04-23
Supplement: d6sc02344d1.pdf [file d6sc02344d1.pdf]

## Supporting Information

### **Enantioselective Synthesis of Configurationally Stable [5]helicenes Containing 1,2-Azaborine Units**

*Catherine Olguin, Christian Tabacaru, Lennart Besse, Martin Simon, Christopher Golz, Marcos Humanes, Manuel A. Fernández-Rodríguez, Patricia García-García,\* Maike Mücke, Ricardo A. Mata\* and Manuel Alcarazo\**

## Table of contents

|                                                                                                                                           |     |
|-------------------------------------------------------------------------------------------------------------------------------------------|-----|
| 1. Materials and Methods.....                                                                                                             | 4   |
| 2. Synthesis and Characterization .....                                                                                                   | 7   |
| 2.1. Synthetic route of brominated BN-Polyarenes <b>4</b> , <b>S4(BPh)</b> and <b>S4(NMe)</b> .....                                       | 7   |
| Step 1. Synthesis of 4-bromo-2-(4-phenylbut-1-yn-1-yl)aniline <b>S6</b> .....                                                             | 7   |
| Step 2. Synthesis of dihydro BN-benzo[c]phenanthrenes <b>3</b> and <b>S3(BPh)</b> .....                                                   | 7   |
| Step 3. Synthesis of BN-benzo[c]phenanthrenes <b>4</b> and <b>S4(BPh)</b> (oxidation step).....                                           | 9   |
| N-Methylation. Synthesis of Br-substituted BN-Polyarene <b>S4(NMe)</b> .....                                                              | 10  |
| 2.2. Synthetic route of chlorinated BN-Polyarene <b>6</b> .....                                                                           | 10  |
| 2.3. Negishi cross-couplings. Synthesis of <b>5a-j</b> , <b>7b-h</b> , <b>S5b(BPh)</b> and <b>S5b(NMe)</b> .....                          | 13  |
| 2.4. Au-catalyzed hydroarylation reaction towards azabora[5]helicenes <b>1a-j</b> , <b>1b(BPh)</b> , <b>1b(NMe)</b> and <b>2b-h</b> ..... | 25  |
| 2.5. Post-modification reactions. Synthesis of <b>1b</b> and <b>13b</b> .....                                                             | 45  |
| 3. NMR-Spectra .....                                                                                                                      | 48  |
| 4. HPLC-Chromatograms .....                                                                                                               | 158 |
| 5. Electro-Optical Properties.....                                                                                                        | 175 |
| 5.1. Absorption (UV-vis) and Fluorescence spectra.....                                                                                    | 175 |
| 5.2. Quantum Yield .....                                                                                                                  | 178 |
| 5.3. Lifetime measurement .....                                                                                                           | 179 |
| 5.4. Circular Dichroism of Helicenes .....                                                                                                | 180 |
| 5.5. Circular Polarized Luminescence of Helicenes.....                                                                                    | 188 |
| 6. Racemization Experiments .....                                                                                                         | 191 |
| 7. Crystallographic Supplement.....                                                                                                       | 193 |
| 7.1. <b>1b</b> °MeCN.....                                                                                                                 | 193 |
| 7.2. <b>1d</b> °CH <sub>2</sub> Cl <sub>2</sub> .....                                                                                     | 194 |
| 7.3. <b>1e</b> °MeCN .....                                                                                                                | 196 |

|       |                                                                   |     |
|-------|-------------------------------------------------------------------|-----|
| 7.4.  | <b>1f</b> .....                                                   | 197 |
| 7.5.  | <b>1g</b> °MeCN.....                                              | 198 |
| 7.6.  | <b>1h</b> .....                                                   | 199 |
| 7.7.  | <b>4</b> .....                                                    | 200 |
| 7.8.  | <b>S4(NMe)</b> .....                                              | 201 |
| 7.9.  | <b>S4(BPh)</b> .....                                              | 202 |
| 7.10. | <b>5a</b> .....                                                   | 203 |
| 7.11. | <b>5c</b> °HCCl <sub>3</sub> .....                                | 204 |
| 7.12. | <b>7h</b> .....                                                   | 205 |
| 7.13. | <b>S10b(NMe)</b> °0.5CH <sub>2</sub> Cl <sub>2</sub> .....        | 206 |
| 7.14. | <b>11b</b> .....                                                  | 207 |
| 7.15. | <b>12b</b> .....                                                  | 208 |
| 7.16. | <b>12b</b> °[0.5 CH <sub>2</sub> Cl <sub>2</sub> ; 0.5 MeCN]..... | 209 |
| 7.17. | <b>13b</b> °1.5 HCCl <sub>3</sub> .....                           | 210 |
| 8.    | Computational Details.....                                        | 211 |
| 9.    | References.....                                                   | 222 |

## 1. Materials and Methods

Unless stated otherwise, all reactions were carried out using pre-dried glassware under an inert atmosphere (nitrogen or argon) using standard Schlenk techniques, or in a MBraun UNILab plus glovebox.

**Solvents:** anhydrous and degassed solvents (DCM, THF, toluene, DCE) were obtained from a MBraun Solvent Purification System (MB-SPS-800) or by distillation over the appropriate drying agent and stored under a protective gas atmosphere.

**Chromatography:** Thin-Layer Chromatography (TLC) was performed with polygram SIL G/UV254 from Macherey-Nagel, and plates were visualized with short-wave UV light (254 and 366 nm). Flash chromatography was performed on Macherey-Nagel 60 (40-63  $\mu\text{m}$ ) silica gel.

**Starting Materials:** all reagents were used as received from commercial suppliers (BLD Pharmatech GmbH, Fisher Scientific GmbH, Sigma-Aldrich Chemie GmbH, ChemPur GmbH and TCI Deutschland GmbH). Silver hexafluoroantimonate ( $\text{AgSbF}_6$ ) was purchased from Sigma-Aldrich and transferred into a glovebox. The chiral BINOL-based Au(I) complexes **9a-b**<sup>[1]</sup> and **9c**,<sup>[2]</sup> the chiral TADDOL-based Au(I) complex **8a-b**,<sup>[3]</sup> and compound **14** were prepared according to a reported procedure.<sup>[2]</sup>

**NMR:** spectra were recorded on Bruker Avance Neo 600, Avance Neo 400, Avance III HD 400, Avance III 400 or Avance III HD 300 spectrometers.  $^1\text{H}$  and  $^{13}\text{C}$  chemical shifts ( $\delta$ ) are reported in ppm relative to TMS using the solvent signals as reference in Chloroform- $d$  ( $^1\text{H}$ : 7.26 ppm,  $^{13}\text{C}$ : 77.16 ppm), Methylene chloride- $d_2$  ( $^1\text{H}$ : 5.32 ppm,  $^{13}\text{C}$ : 53.84 ppm), Tetrahydrofuran- $d_8$  ( $^1\text{H}$ : 3.58 ppm,  $^{13}\text{C}$ : 67.57 ppm), 1,1,2,2-Tetrachloroethane- $d_2$  ( $^1\text{H}$ : 5.99 ppm,  $^{13}\text{C}$ : 73.78 ppm) and benzene- $d_6$  ( $^1\text{H}$ : 7.16 ppm). Coupling constants ( $J$ ) are given in Hertz (Hz). Data is reported as follows: s = singlet, d = doublet, t = triplet, q = quartet, m = multiplet, br = broad; coupling constants in Hz; integration.

**HRMS:** spectra were recorded using Bruker Daltonik maXis Q-TOF (ESI), Bruker Daltonik micrOTOF (ESI), Thermo Scientific LTQ Orbitrap XL (ESI), Thermo Scientific Exactive GC-Orbitrap-MS (EI) or Jeol AccuTOF (EI) instruments. Dimensionless mass-to-charge ratios ( $m/z$ ) are given

**IR:** infrared spectra were recorded on a FT/IR-4600 spectrometer and reported in wavenumbers ( $\text{cm}^{-1}$ ).

**Melting point:** melting points were measured with a Büchi M-560 apparatus with a heating rate of 5  $^\circ\text{C}/\text{min}$ .

**Specific rotations:** were collected using Jasco P-2000 polarimeters at the stated temperature under a Na/Hg lamp,  $\lambda = 589 \text{ nm}$  ( $c$  in g/100 mL).

**Circular Dichroism:** spectra were measured on a Jasco J-1500 spectrometer using a 1.0 mm quartz sample cell.

**Circularly Polarized Luminescence:** Circularly Polarized Luminescence spectra were performed in an Olis CPL SOLO spectrophotometer using a 1.0 cm path-length quartz cell. A

fixed wavelength LED (310 nm or 270 nm) was used as the excitation source. For compounds **1b**, **2b** and **14**, to prevent sample decomposition during data acquisition, a reduced wavelength range was used to more accurately determine  $g_{lum}$ .

**UV/Vis:** spectra were measured on a Specord S600 or Jasco V-750 spectrometer, using 10 mm quartz sample cells.

**Fluorescence spectra:** were measured using an Edinburgh Instruments FS5 Spectrofluorometer and a 10 mm quartz sample cell.

**Fluorescence Lifetime:** measurements were conducted using an Edinburgh Instruments FS5 Spectrofluorometer using a SC-05 cuvette holder. For Irradiation an Edinburgh Instruments EPLED-310 ( $\lambda = 310 \pm 10$  nm,  $P = 40$   $\mu$ W) was used using a pulse period of 50 or 100 ns. Emission was detected by a PMT-900 detector. Operation of the spectrofluorometer and analysis was performed using the Fluoracle software. The detection wavelength of the instrument was set to the maximum of the emission of the sample with a shutter length of 20-25 ns and using 1024 channels and a time range of 50-100 ns. The measurement was conducted for 30 minutes or until a photon count of 10000 was achieved. Measurements were conducted using 10x10 mm quartz cuvettes. For the IRF, a scattering non-emissive sample (prepared from LUDOX® AM colloidal silica 30 wt.% suspension in water purchased from Sigma Aldrich) was used.

**Quantum Yield:** absolute photoluminescence quantum yield measurements were performed using an FS5 spectrofluorometer (Edinburgh Instruments Ltd) equipped with an SC-30 integrating sphere (150 mm diameter, Edinburgh Instruments Ltd) with a surface machined from a PTFE-based material. Identical cuvettes were used for the sample and blank (solvent only). Excitation was provided by a xenon arc lamp and double monochromator system. Emission was detected by a PMT-900 detector. Operation of the spectrofluorometer and analysis was performed using the Fluoracle software. Liquid samples were measured in standard 10 mm  $\times$  10 mm quartz cuvettes with PTFE stoppers. Concentrations were adjusted to keep the absorbance below 0.1 for quantum yield measurements.

**HPLC:** achiral analyses were performed using a Shimadzu Nexera-i LC2040C 3D compact HPLC; preparative HPLC methods were scaled from the analytical methods and processed using an Interchim PuriFlash 4250 combined flash and preparative HPLC system. The columns employed for achiral separations were Agilent Zorbax SB-C18, 4.6x250mm, 3.5 $\mu$ m particles and 21.2x250mm, 7 $\mu$ m particles, for analytical and preparative methods respectively. The enantiomeric excesses of the products were determined using a Waters UPC<sup>2</sup> with integrated downstream PDA Detector or a Waters Acquity multidimensional high-performance liquid chromatograph (MD-UPLC), custom configuration with column switching in both separation dimensions. System comprised of Waters Acquity Sample Manager FT-N, Binary Solvent Manager, Column Manager with additional CM-Aux module, PDA Detector for fast single dimension method screening in first dimension, Quaternary Solvent Manager, Column Manager with 2 additional CM-Aux modules, PDA Detector and SQD2 mass spectrometer in second dimension. Specific conditions such as column type used, eluent mixtures, flow rates and temperatures are stated for each compound. For chiral measurements on the UPC<sup>2</sup> system, conditions were set as 2.5mL/min flow, 2500 psi backpressure, 310 K column temperature with varying mobile phase compositions denoted for each compound. System control and chromatogram analysis were carried out with Empower 3 (Waters), LabSolutions (Shimadzu) or Intersoft (Interchim) software.

**General Crystallography:** Data collection was done on two dual source equipped *Bruker D8 Venture* four-circle-diffractometer from *Bruker AXS GmbH*; used X-ray sources: microfocus *I $\mu$ S 2.0* Cu/Mo and microfocus *I $\mu$ S 3.0* Ag/Mo from *Incoatec GmbH* with mirror optics *HELIOS* and single-hole collimator from *Bruker AXS GmbH*; used detector: *Photon III CE14* (Cu/Mo) and *Photon III HE* (Ag/Mo) from *Bruker AXS GmbH*. Used programs: *APEX3 Suite* (v2019.11-0) for data collection and therein integrated programs *SAINT V8.40A* (Integration) und *SADABS 2016/2* (Absorption correction) from *Bruker AXS GmbH*; structure solution was done with *SHELXT*, refinement with *SHELXL-2018/3*;<sup>[4]</sup> *OLEX2*<sup>[5]</sup> and *FinalCIF V85* were used for data finalization.

Special Utilities: *SMZ1270* stereomicroscope from *Nikon Metrology GmbH* was used for sample preparation; crystals were mounted on *MicroMounts* or *MicroLoops* from *MiTeGen* in NVH oil; crystals were cooled to given temperature with *Cryostream 800* from *Oxford Cryosystems*.

## 2. Synthesis and Characterization

### 2.1. Synthetic route of brominated BN-Polyarenes **4**, **S4(BPh)** and **S4(NMe)**

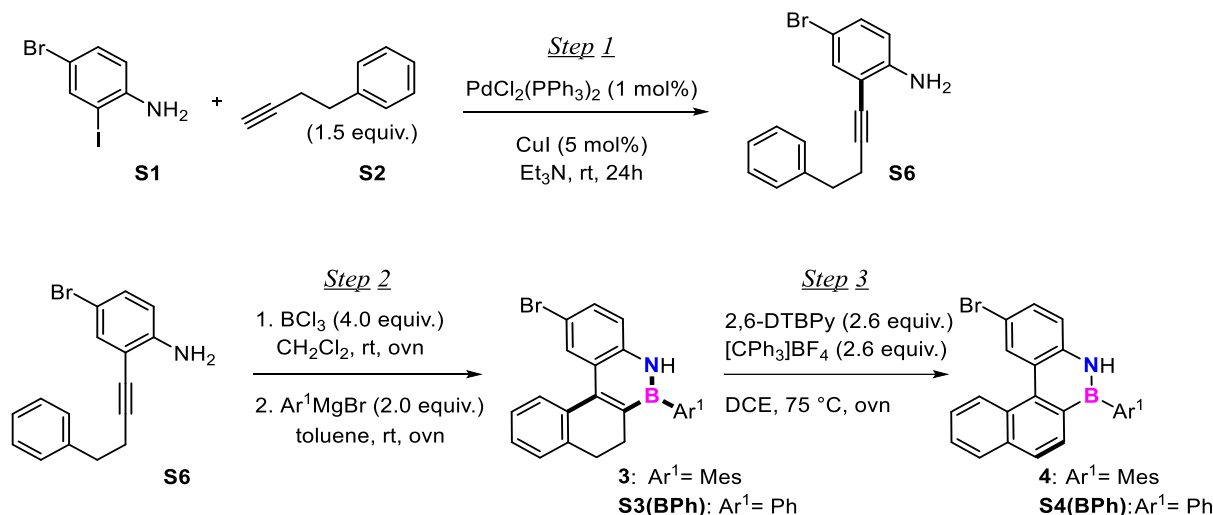

**Scheme S1** Synthesis of brominated BN-Polyarenes **4** and **S4(BPh)**

#### Step 1. Synthesis of 4-bromo-2-(4-phenylbut-1-yn-1-yl)aniline **S6**<sup>[6]</sup>

**Protocol.** A schlenk flask was loaded with 4-bromo-2-iodoaniline **S1** (1.0 g, 3.36 mmol, 1.0 equiv.), CuI (32 mg, 0.168 mmol, 5 mol %) and PdCl<sub>2</sub>(PPh<sub>3</sub>)<sub>2</sub> (24 mg, 0.034 mmol, 1 mol %). Then the schlenk was evacuated and purged with argon five times. Triethylamine (6.4 mL) was added, and the resulting suspension was stirred at room temperature for 30 min. Then, 4-phenyl-1-butyne **S2** (0.71 mL, 5.04 mmol, 1.5 equiv.) was added, and the mixture was stirred at room temperature for 24 h. The resulting mixture was extracted with DCM and the combined organic layers were dried over Na<sub>2</sub>SO<sub>4</sub>, filtered and concentrated under reduced pressure. Silica gel column chromatography (hexane/AcOEt 95:5) yielded product **S6** (958 mg, 3.19 mmol, 95%) as a yellow-orange oil.

#### Step 2. Synthesis of dihydro BN-benzo[*c*]phenanthrenes **3** and **S3(BPh)**<sup>[6]</sup>

**General protocol.** A schlenk flask was loaded with 4-bromo-2-(4-phenylbut-1-yn-1-yl)aniline **S6** (1.0 equiv.) and dissolved in anhydrous DCM (0.25 M). Then a cold (≈ 5 °C) boron trichloride solution (1.0 M in DCM, 4.0 equiv.) was added dropwise and the solution was left stirring overnight at room temperature. The reaction mixture was concentrated under reduced pressure using Schlenk techniques. Then, the resulting B–Cl intermediate was redissolved in anhydrous toluene (0.25 M) and the corresponding Grignard reagent (2.0 equiv.) was added and the reaction mixture was left stirring overnight. The remaining Grignard was quenched with a 2-propanol/toluene solution (2:8) and the resulting crude mixture was filtered through a Celite plug. The filtrate was concentrated and further purified via silica gel column chromatography.

### Dihydro BN-benzo[c]phenanthrene **3**

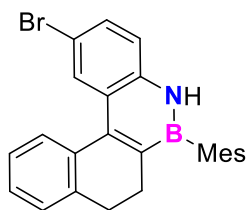

Compound **3** was synthesized following the general procedure from aniline **S6** (450 mg, 1.5 mmol, 1.0 equiv.) and  $\text{BCl}_3$  (1.0 M in DCM, 6 mL, 4.0 equiv.). Then, 2-mesitylmagnesium bromide (1.0 M in THF, 3 mL, 2.0 equiv.) was added to the resulting B–Cl intermediate. Silica gel column chromatography (hexane/DCM 5:1) yielded product **3** as a white solid (384 mg, 0.90 mmol, 60%).

$^1\text{H NMR}$  (300 MHz,  $\text{CDCl}_3$ )  $\delta$  = 8.44 (d,  $J$  = 2.0 Hz, 1H), 7.80 (d,  $J$  = 7.6 Hz, 1H), 7.76 (br. s, 1H), 7.50 (dd,  $J$  = 8.6, 2.1 Hz, 1H), 7.46 – 7.27 (m, 3H), 7.16 (d,  $J$  = 8.6 Hz, 1H), 6.91 (s, 2H), 2.69 – 2.60 (m, 2H), 2.45 – 2.38 (m, 2H), 2.34 (s, 3H), 2.15 (s, 6H) ppm.

$^{13}\text{C NMR}$  (101 MHz,  $\text{CDCl}_3$ )  $\delta$  = 144.5 (1Cq), 141.2 (1Cq), 140.1 (2Cq), 139.4 (1Cq), 137.7 (1Cq), 133.2 (1Cq), 130.04 (1CH), 129.96 (1CH), 128.1 (1CH), 128.0 (2CH), 127.3 (2CH), 126.2 (1CH), 124.6 (1Cq), 120.4 (1CH), 113.7 (1Cq), 29.2 (1CH<sub>2</sub>), 27.5 (1CH<sub>2</sub>), 22.7 (2CH<sub>3</sub>), 21.4 (1CH<sub>3</sub>) ppm. The carbon atoms bonded to boron are not observed.

$^{11}\text{B NMR}$  (161 MHz,  $\text{CDCl}_3$ )  $\delta$  = 37.35 ppm.

**IR (ATR)**  $\tilde{\nu}$  = 3364, 2931, 2829, 1605, 1532, 1448, 1429, 1410, 1329, 1263, 1158, 981, 866, 813, 776, 746  $\text{cm}^{-1}$ .

**HRMS** calcd  $m/z$  for  $\text{C}_{25}\text{H}_{24}\text{BBrN}$   $[\text{M}+\text{H}]^+$ : 428.1181; found (pAPCI): 428.1182

**M.p.** = 110 °C

### Dihydro BN-benzo[c]phenanthrene **S3(BPh)**

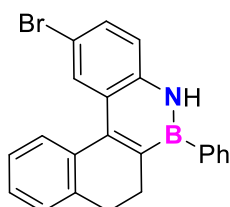

Compound **S3(BPh)** was synthesized following the general procedure from aniline **S6** (450 mg, 1.5 mmol, 1.0 equiv.) and  $\text{BCl}_3$  (1.0 M in DCM, 6 mL, 4.0 equiv.). Then, phenylmagnesium bromide (1.0 M in THF, 3 mL, 2.0 equiv.) was added to the resulting B–Cl intermediate.<sup>[6]</sup> Silica gel column chromatography (hexane/AcOEt 95:5) yielded product **S3(BPh)** as a white solid (369 mg, 0.96 mmol, 63%).

$^1\text{H NMR}$  (300 MHz,  $\text{CDCl}_3$ )  $\delta$  = 8.42 (d,  $J$  = 1.7 Hz, 1H), 7.90 (br. s, 1H), 7.76 (d,  $J$  = 7.2 Hz, 1H), 7.72 – 7.65 (m, 2H), 7.54 – 7.32 (m, 7H), 7.23 (d,  $J$  = 8.6 Hz, 1H), 2.86 – 2.76 (m, 2H), 2.73 – 2.63 (m, 2H) ppm.

$^{13}\text{C NMR}$  (101 MHz,  $\text{CDCl}_3$ )  $\delta$  = 145.6 (1Cq), 141.0 (1Cq), 139.3 (1Cq), 133.23 (1Cq), 133.0 (2CH), 130.2 (1CH), 130.1 (1CH), 128.9 (1CH), 128.2 (2CH), 128.1 (1CH), 128.0 (1CH), 127.9 (1CH), 126.2 (1CH), 124.6 (1Cq), 120.4 (1CH), 113.7 (1Cq), 29.3 (1CH<sub>2</sub>), 28.0 (1CH<sub>2</sub>) ppm. The carbon atoms bonded to boron are not observed.

$^{11}\text{B NMR}$  (128 MHz,  $\text{CDCl}_3$ )  $\delta$  = 35.03 ppm.

**HRMS** calcd  $m/z$  for  $\text{C}_{22}\text{H}_{18}\text{BBrN}$   $[\text{M}+\text{H}]^+$ : 386.0711; found (pAPCI): 386.0706

*Step 3. Synthesis of BN-benzo[*c*]phenanthrenes 4 and S4(BPh) (oxidation step)<sup>[6]</sup>*

**General protocol.** The oxidation of the dihydro BN-benzo[*c*]phenanthrenes was carried out following a previously reported procedure but using 2,6-di-*tert*-butylpyridine (DTBPy) instead of 2,4,6-tri-*tert*-butylpyridine (TTBP) as sterically-hindered base.<sup>[6]</sup> A Schlenk flask was loaded with the corresponding dihydro BN-benzo[*c*]phenanthrene (1.0 equiv.), DTBPy (2.6 equiv.) and [Ph<sub>3</sub>C]BF<sub>4</sub> (2.6 equiv.) and dissolved in anhydrous DCE (0.1 M). The reaction mixture was stirred overnight at 75 °C. The resulting crude mixture was filtered over a Celite pad using DCM/Hexane (20:80) as eluent and the filtrate was concentrated and purified via silica gel column chromatography.

BN-benzo[*c*]phenanthrene **4**

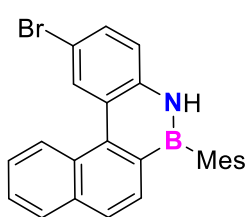

Compound **4** was synthesized following the general procedure from dihydro BN-benzo[*c*]phenanthrene **3** (139 mg, 0.32 mmol, 1.0 equiv.), DTBPy (0.19 mL, 0.85 mmol, 2.6 equiv.) and [Ph<sub>3</sub>C]BF<sub>4</sub> (279 mg, 0.85 mmol, 2.6 equiv.) in anhydrous DCE (0.1 M, 3.2 mL). Silica gel column chromatography (hexane/toluene 7:1 to 3:1) yielded product **4** as a white solid (104 mg, 0.24 mmol, 75%).

**<sup>1</sup>H NMR** (300 MHz, CD<sub>2</sub>Cl<sub>2</sub>)  $\delta$  = 8.98 – 8.87 (m, 2H), 8.05 – 7.96 (m, 1H), 7.95 (br. s, 1H), 7.82 (d, *J* = 8.2 Hz, 1H), 7.73 – 7.61 (m, 3H), 7.59 (dd, *J* = 8.5, 2.2 Hz, 1H), 7.32 (d, *J* = 8.6 Hz, 1H), 6.95 (s, 2H), 2.36 (s, 3H), 2.11 (s, 6H) ppm.

**<sup>13</sup>C NMR** (101 MHz, CDCl<sub>3</sub>)  $\delta$  = 140.5 (2Cq), 138.8 (1Cq), 138.0 (1Cq), 137.0 (1Cq), 136.4 (1Cq), 132.4 (1CH), 131.1 (1CH), 130.3 (1CH), 129.7 (1Cq), 128.8 (1CH), 127.6 (1CH), 127.44 (1CH), 127.36 (2CH), 127.1 (1CH), 126.3 (1CH), 125.3 (1Cq), 120.5 (1CH), 113.8 (1Cq), 23.0 (2CH<sub>3</sub>), 21.4 (1CH<sub>3</sub>) ppm. The carbon atoms bonded to boron are not observed.

**<sup>11</sup>B NMR** (161 MHz, CD<sub>2</sub>Cl<sub>2</sub>)  $\delta$  = 39.25 ppm.

**IR (ATR)**  $\tilde{\nu}$  = 3375, 1597, 1545, 1472, 1429, 1326, 1247, 854, 814, 744, 717 cm<sup>-1</sup>.

**HRMS** calcd *m/z* for C<sub>25</sub>H<sub>21</sub>BBrN [M]<sup>+</sup>: 425.1060; found (ESI): 425.0942

**M.p.** = 197 °C

BN-benzo[*c*]phenanthrene **S4(BPh)**

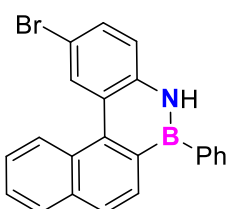

Compound **S4(BPh)** was synthesized following the general procedure from dihydro BN-benzo[*c*]phenanthrene **S3(BPh)** (1.00 g, 2.59 mmol, 1.0 equiv.), DTBPy (1.5 mL, 6.7 mmol, 2.6 equiv.) and [Ph<sub>3</sub>C]BF<sub>4</sub> (2.212 g, 6.7 mmol, 2.6 equiv.) in anhydrous DCE (0.1 M, 26 mL). Silica gel column chromatography (hexane/ethyl acetate/toluene 95:2:5) yielded product **S4(BPh)** as a white solid (580 mg, 1.51 mmol, 58%).

**<sup>1</sup>H NMR** (400 MHz, CDCl<sub>3</sub>)  $\delta$  = 8.92 – 8.87 (m, 1H), 8.85 (d, *J* = 2.0 Hz, 1H), 8.15 (d, *J* = 8.2 Hz, 1H), 8.04 – 7.99 (m, 1H), 7.88 (d, *J* = 8.4 Hz, 1H), 7.86 (br. s, 1H), 7.81 – 7.77 (m, 2H), 7.71 – 7.64 (m, 2H), 7.58 (dd, *J* = 8.5, 2.3 Hz, 1H), 7.56 – 7.48 (m, 3H), 7.30 (d, *J* = 8.6 Hz, 1H) ppm.

**<sup>13</sup>C NMR** (101 MHz, CDCl<sub>3</sub>)  $\delta$  = 138.7 (1Cq), 137.9 (1Cq), 136.1 (1Cq), 133.5 (2CH), 132.5 (1CH), 131.1 (1CH), 130.5 (1CH), 129.6 (1Cq), 129.0 (1CH), 128.7 (1CH), 128.3 (2CH), 127.7 (1CH), 127.2 (2CH), 126.3 (1CH), 125.2 (1Cq), 120.5 (1CH), 113.8 (1Cq) ppm. The carbon atoms bonded to boron are not observed.

**<sup>11</sup>B NMR** (128 MHz, CDCl<sub>3</sub>)  $\delta$  = 37.37 ppm.

**HRMS** calcd  $m/z$  for C<sub>22</sub>H<sub>16</sub>BBrN [M+H]<sup>+</sup>: 384.0554; found (pAPCI): 384.0550

*N*-Methylation. Synthesis of Br-substituted BN-Polyarene **S4(NMe)**<sup>[7]</sup>

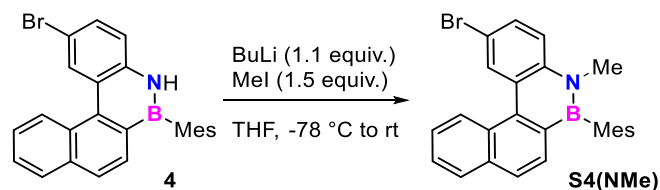

**Scheme S2** *N*-Methylation of compound **4**

**Protocol.** BN-benzo[*c*]phenanthrene **4** (100 mg, 0.23 mmol, 1.0 equiv.) was dissolved in anhydrous THF (0.2 M, 1.1 mL) and *n*-BuLi (0.1 mL, 2.5 M in hexane, 1.1 equiv.) was added at -78 °C. After stirring for 10 minutes, MeI (22  $\mu$ L, 0.35 mmol, 1.5 equiv.) was added at the same temperature and the reaction mixture left stirring at room temperature overnight. The mixture was diluted with EtOAc and washed with brine and the resulting aqueous solution extracted again with EtOAc. The combined organic fractions were dried over Na<sub>2</sub>SO<sub>4</sub> and concentrated under reduced pressure. HPLC purification (acetonitrile:H<sub>2</sub>O 95:5→100:0 over 5 min, flow rate 1.0 mL/min at 295 K) yielded product **S4(NMe)** (72 mg, 0.16 mmol, 70%) as a white solid.

**<sup>1</sup>H NMR** (300 MHz, CDCl<sub>3</sub>)  $\delta$  = 9.04 (d,  $J$  = 1.8 Hz, 1H), 8.83 (d,  $J$  = 8.4 Hz, 1H), 7.96 (d,  $J$  = 7.5 Hz, 1H), 7.85 (dd,  $J$  = 8.6, 1.6 Hz, 1H), 7.76 – 7.59 (m, 3H), 7.51 – 7.43 (m, 2H), 6.95 (s, 2H), 3.53 (s, 3H), 2.39 (s, 3H), 2.01 (s, 6H) ppm.

**<sup>13</sup>C NMR** (101 MHz, CDCl<sub>3</sub>)  $\delta$  = 141.7 (1Cq), 139.7 (2Cq), 138.8 (1CH), 137.5 (1Cq), 136.5 (1Cq), 136.3 (1Cq), 136.0 (1CH), 131.1 (1CH), 129.3 (1Cq), 128.7 (1CH), 127.8 (1CH), 127.35 (2CH), 127.27 (1CH), 127.24 (1Cq), 126.9 (1CH), 126.2 (1CH), 117.5 (1CH), 84.0 (1Cq), 36.5 (1CH<sub>3</sub>), 22.6 (2CH<sub>3</sub>), 21.5 (1CH<sub>3</sub>) ppm. The carbon atoms bonded to boron are not observed.

**<sup>11</sup>B NMR** (161 MHz, CDCl<sub>3</sub>)  $\delta$  = 41.36 ppm.

**IR (ATR)**  $\tilde{\nu}$  = 2912, 1541, 1469, 1412, 1358, 1307, 1281, 849, 809, 751 cm<sup>-1</sup>.

**HRMS** calcd  $m/z$  for C<sub>26</sub>H<sub>24</sub>BBrN [M+H]<sup>+</sup>: 441.1205; found (pAPCI): 441.1209

**M. p.** = 98 °C

## 2.2. Synthetic route of chlorinated BN-Polyarene **6**

The synthesis of **6** was carried out by adapting a known protocol for other BN-benzo[*c*]phenanthrenes.<sup>[8]</sup>

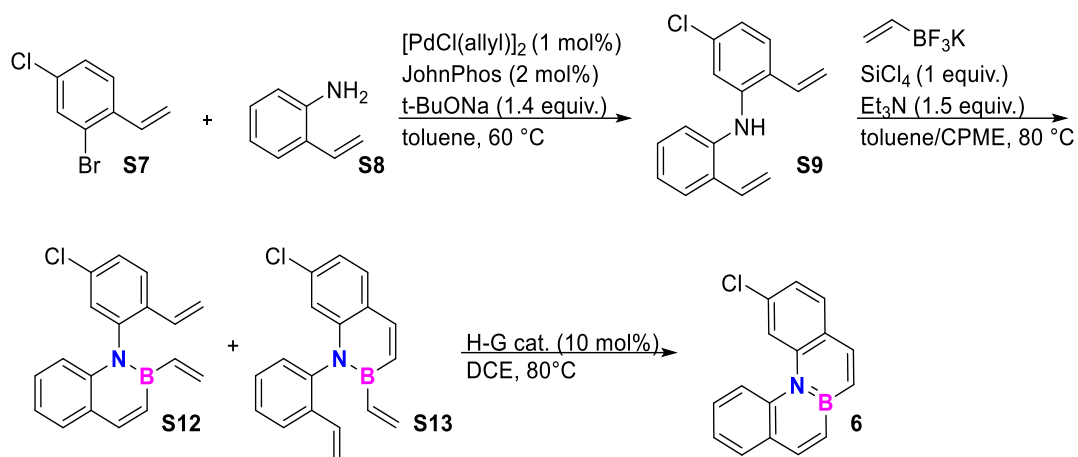

**Scheme S3** Synthesis of the chlorinated BN-Polyarene **6**

### 5-Chloro-2-vinyl-*N*-(2-vinylphenyl)aniline **S9**

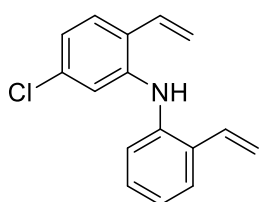

**Protocol.** To a sealable Schlenk flask with a stir bar were added  $[\text{PdCl}(\text{allyl})]_2$  (40.4 mg, 0.11 mmol, 1 mol%), JohnPhos (65.9 mg, 0.22 mmol, 2 mol%), and *t*BuONa (1.49 g, 15.44 mmol, 1.4 equiv.). The flask was purged with Ar, and the reagents were suspended in dry toluene (0.6 M). Sequentially, 2-bromo-4-chlorostyrene **S7**<sup>[9]</sup> (2.40 g, 11.03 mmol, 1.0 equiv.) and 2-vinylaniline **S8** (1.55 mL, 13.2 mmol, 1.2 equiv.) were added. The resulting mixture was heated to 60 °C and stirred until full consumption of 2-bromo-4-chlorostyrene **S7** (16 h). The reaction mixture was cooled to room temperature, diluted with Et<sub>2</sub>O, and filtered over Celite. The solvent was removed under reduced pressure, and the resulting crude mixture was purified by flash column chromatography on silica gel using Hexane/AcOEt 99:1 as eluent to yield product **S9** (2.22 g, 79%).

Obtained as pale yellow oil (2.22 g, 8.68 mmol, 79 %).  $R_f = 0.28$  (Hexane/AcOEt 99:1).

**<sup>1</sup>H NMR** (400 MHz, CDCl<sub>3</sub>)  $\delta = 7.53$  (dd,  $J = 7.6, 1.6$  Hz, 1H), 7.34 (d,  $J = 7.9$  Hz, 1H), 7.28–7.22 (m, 1H), 7.14–7.07 (m, 2H), 6.93–6.89 (m, 1H), 6.92 (s, 1H), 6.88–6.79 (m, 2H), 5.75 (dd,  $J = 10.6, 1.4$  Hz, 1H), 5.70 (dd,  $J = 10.5, 1.3$  Hz, 1H), 5.53 (bs, 1H), 5.39 (dd,  $J = 11.0, 1.4$  Hz, 1H), 5.35 (dd,  $J = 11.0, 1.4$  Hz, 1H) ppm.

**<sup>13</sup>C NMR** (101 MHz, CDCl<sub>3</sub>)  $\delta = 142.8$  (1Cq), 139.5 (1Cq), 134.4 (1Cq), 132.6 (1CH), 131.9 (1CH), 130.7 (1Cq), 128.9 (1CH), 128.5 (1CH), 127.4 (1CH), 126.2 (1Cq), 123.5 (1CH), 121.4 (1CH), 121.1 (1CH), 117.3 (1CH), 117.2 (1CH<sub>2</sub>), 116.8 (1CH<sub>2</sub>) ppm.

**HRMS (ESI-TOF)**  $m/z$ :  $[\text{M}+\text{H}]^+$  Calcd for  $[\text{C}_{16}\text{H}_{15}\text{ClN}]^+$  256.0888. Found 256.0887.

1-(3-Chloro-6-vinylphenyl)-2-vinyl-1-aza-2-boranaphthalene **S12** and 7-chloro-2-vinyl-1-(2-vinylphenyl)-1-aza-2-boranaphthalene **S13**

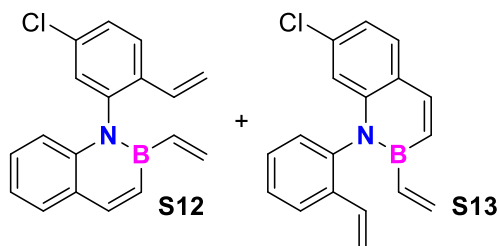

**Protocol.** To a sealable Schlenk flask with a stir bar was added potassium vinyltrifluoroborate (872.9 mg, 6.52 mmol, 1.0 equiv.). The flask was purged with Ar, and cyclopentyl methyl ether and toluene (1:1, 0.25 M) were added, followed by aniline **S9** (2.09 g, 7.8 mmol, 1.2 equiv.), SiCl<sub>4</sub> (0.75 mL, 6.52 mmol, 1.0

equiv.) and Et<sub>3</sub>N (1.36 mL, 9.78 mmol, 1.5 equiv.). The flask was sealed and the resulting mixture was heated to 80 °C for 16 h. Then, the reaction mixture was cooled to room temperature, diluted with Et<sub>2</sub>O, filtered over a plug of silica gel and flushed with Et<sub>2</sub>O. The solvent was removed under reduced pressure and the resulting crude mixture was purified via flash column chromatography on silica gel (hexanes) to provide a mixture of both possible isomers **S12** and **S13** (1.57 g, 83%)

Obtained as colorless oil (1.57 g, 5.38 mmol, 83%, 1/1 mixture of regioisomers). R<sub>f</sub> = 0.33 (Hexane).

**<sup>1</sup>H NMR** (400 MHz, CDCl<sub>3</sub>) δ = 8.09 (d, *J* = 11.6 Hz, 1H), 8.04 (d, *J* = 11.6 Hz, 1H), 7.79 (dd, *J* = 7.5, 1.9 Hz, 1H), 7.71 (d, *J* = 8.5 Hz, 1H), 7.67 (dd, *J* = 7.7, 1.6 Hz, 1H), 7.58 (d, *J* = 8.3 Hz, 1H), 7.51–7.41 (m, 3H), 7.31–7.26 (m, 1H), 7.22–7.06 (m, 6H), 6.72–6.66 (m, 2H), 6.29–6.11 (m, 4H), 5.94–5.73 (m, 4H), 5.70 (dd, *J* = 10.7, 1.1 Hz, 1H), 5.66 (dd, *J* = 10.7, 1.1 Hz, 1H), 5.13–5.05 (m, 2H) ppm.

**<sup>11</sup>B NMR** (128 MHz, CDCl<sub>3</sub>) δ = 33.7 ppm

**<sup>13</sup>C NMR** (101 MHz, CDCl<sub>3</sub>) δ = 145.3 (1CH), 144.4 (1CH), 143.0 (1Cq), 142.5 (1Cq), 141.8 (1Cq), 140.8 (1Cq), 135.3 (1Cq), 134.34 (1Cq), 134.33 (1Cq), 134.2 (1Cq), 134.02 (1CH<sub>2</sub>), 133.99 (1CH<sub>2</sub>), 131.6 (1CH), 130.9 (1CH), 130.8 (1CH), 129.9 (1CH), 129.6 (1CH), 129.4 (1CH), 129.3 (1CH), 128.6 (1CH), 128.23 (1CH), 128.22 (1CH), 127.2 (1CH), 126.4 (1CH), 126.3 (1Cq), 124.8 (1Cq), 121.8 (1CH), 121.5 (1CH), 117.4 (2CH), 116.9 (1CH<sub>2</sub>), 116.7 (1CH<sub>2</sub>) ppm. The signals of the C atoms directly bonded to B are not observed.

**HRMS (ESI-TOF)** *m/z*: [M+H]<sup>+</sup> Calcd for [C<sub>18</sub>H<sub>16</sub>BClN]<sup>+</sup> 292.1062. Found 292.1060.

2-Chloro-12*b*-aza-6*a*-borabenzo[*c*]phenanthrene **6**

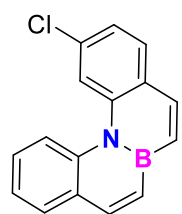

**Protocol.** To a solution of compounds **S12** and **S13** (1.85 g, 6.34 mmol, 1.0 equiv.) in anhydrous 1,2-dichloroethane (63 mL, 0.1 M), prepared under argon in a Schlenk flask, was added a solution of Hoveyda-Grubbs second generation catalyst (397.6 mg, 0.634 mmol, 10 mol%) in anhydrous 1,2-dichloroethane (12 mL, 0.05 M). The flask was sealed and the reaction mixture was stirred at 80 °C for 24 h. After cooling to room temperature, the mixture was diluted with DCM,

filtered over a plug of silica gel and flushed with DCM. The solvent was removed under reduced pressure, and the crude residue was purified by flash column chromatography on silica gel (hexane) to afford product **6** (1.17 g, 70%).

Obtained as white powder (1.17 g, 4.44 mmol, 70%). R<sub>f</sub> = 0.5 (Hexane). M.p.: 88-90 °C

**<sup>1</sup>H NMR** (400 MHz, CDCl<sub>3</sub>)  $\delta$  = 8.53 (ddd,  $J$  = 2.0, 0.9, 0.3 Hz, 1H), 8.47-8.44 (m, 1H), 8.01 (d,  $J$  = 11.2 Hz, 1H), 7.97 (d,  $J$  = 11.2 Hz, 1H), 7.78 (dd,  $J$  = 7.7, 1.7 Hz, 1H), 7.69 (d,  $J$  = 8.3 Hz, 1H), 7.49 (ddd,  $J$  = 8.7, 7.1, 1.7 Hz, 1H), 7.36 (ddd,  $J$  = 7.8, 7.1, 1.1 Hz, 1H), 7.30 (dd,  $J$  = 8.4, 2.0 Hz, 1H), 7.23 (d,  $J$  = 11.2 Hz, 1H), 7.21 (d,  $J$  = 11.2 Hz, 1H) ppm.

**<sup>11</sup>B NMR** (128 MHz, CDCl<sub>3</sub>)  $\delta$  = 30.4 ppm.

**<sup>13</sup>C NMR** (101 MHz, CDCl<sub>3</sub>)  $\delta$  = 143.5 (1CH), 142.4 (1CH), 139.6 (1Cq), 138.6 (1Cq), 132.5 (1Cq), 130.9 (1CH), 130.7 (2CH, broad signal), 130.1 (1CH), 129.8 (1Cq), 128.1 (1Cq), 126.9 (1CH), 123.4 (1CH), 123.3 (1CH), 120.9 (1CH), 120.8 (1CH) ppm.

**HRMS (ESI-TOF)**  $m/z$ : [M+H]<sup>+</sup> Calcd for [C<sub>16</sub>H<sub>11</sub>BClN]<sup>+</sup> 264.0746. Found 264.0750.

### 2.3. Negishi cross-couplings. Synthesis of **5a-j**, **7b-h**, **S5b(BPh)** and **S5b(NMe)**

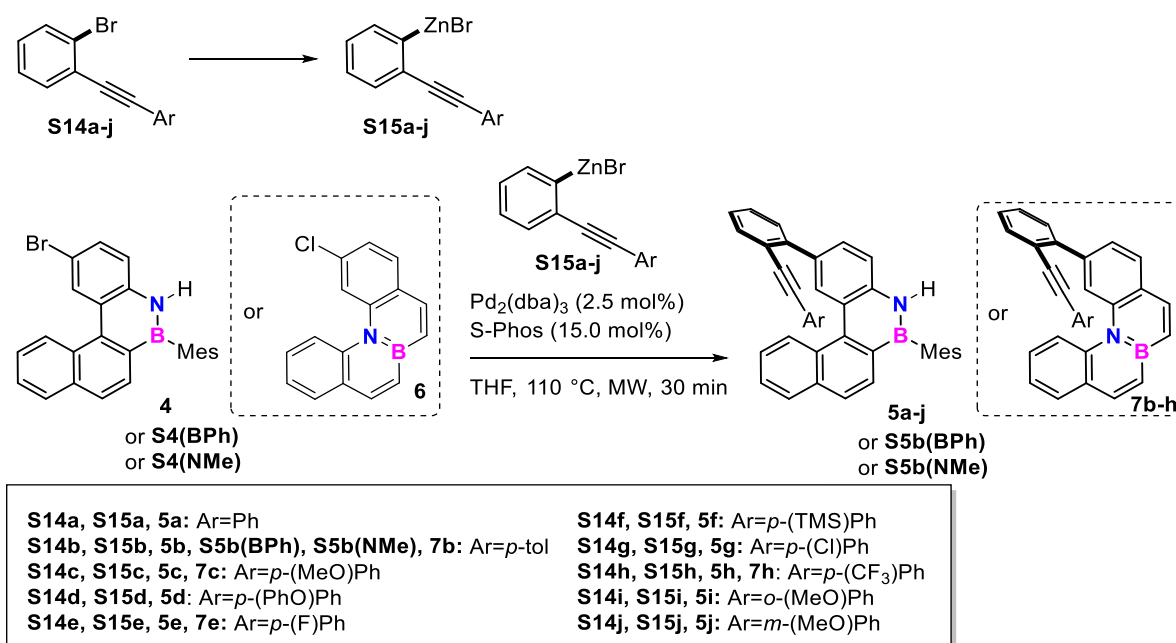

**Scheme S4** Negishi-Cross coupling reaction between BN-Polyarenes and organozinc reagents

Bromoalkynes **S14a-j** were prepared according to literature procedures<sup>[10],[11],[12],[13],[14],[15]</sup>

**General protocol for the synthesis of Arylzinc reagents.**<sup>[16]</sup> In a Schlenk flask, the bromoethynyl arene (**S14a-j**) (1.0 equiv.) was dissolved in anhydrous THF (0.25 M) under nitrogen atmosphere. The solution was cooled down to  $-78$  °C, and *n*-BuLi (2.5 M in hexanes, 1.05 equiv.) was added dropwise. The reaction mixture was stirred for 40 min and then, it was allowed to warm up to  $-50$  °C and a freshly prepared solution of ZnBr<sub>2</sub> in anhydrous THF (1.0 M, 1.3 equiv.) was added dropwise. The mixture was stirred vigorously at  $-50$  °C over 60 min and after that the cooling bath was removed, and the reaction mixture was allowed to warm up to room temperature. After stirring the reaction mixture at room temperature for an additional 3 h, the excess of solvent was partially evaporated in vacuo affording a concentrated solution of the organozinc compound suitable for use in the Negishi cross-coupling reaction. (Normally the final solution concentration was 0.6–0.8 M, as determined by titration following Knochel procedure).<sup>[17]</sup>

**General protocol for the Negishi cross-couplings.**<sup>[16]</sup> An oven-dried microwave vial was equipped with a magnetic stirring bar and charged with the respective brominated (**4**, **S4(BPh)**, **S4(NMe)**) or chlorinated (**6**) BN-polyarene (1.0 equiv.), Pd<sub>2</sub>(dba)<sub>3</sub> (2.5 mol%) and S-Phos (15.0 mol%). The microwave vial was crimped on top with a PFT rubber septum. Then, it was evacuated and refilled with nitrogen (twice). After that, anhydrous THF (0.25 M) was added followed by the organozinc solution (2.5 equiv.). Subsequently, the vial was heated at 110 °C for 30 min under microwave irradiation. Then, the reaction was quenched by addition of MeOH (0.1 mL) and filtered over a pad of Celite with DCM. The filtrate was concentrated and purified by silica gel column chromatography (Hexane/toluene).

### Compound **5a**

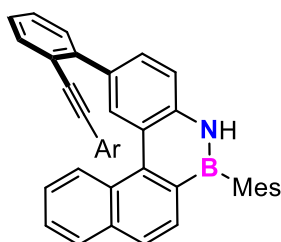

Ar = C<sub>6</sub>H<sub>5</sub>

Compound **5a** was synthesized following the general procedure from brominated BN-polyarene **4** (150 mg, 0.353 mmol), Pd<sub>2</sub>(dba)<sub>3</sub> (8 mg, 0.009 mmol, 2.5 mol%), S-Phos (22 mg, 0.053 mmol, 15.0 mol%) and arylzinc derivative **S15a** (0.882 mmol, 2.5 equiv.). Silica gel column chromatography (hexane/toluene 5:1 to 3:1) yielded the product (100 mg, 0.191 mmol, 54%) as a white solid.

<sup>1</sup>H NMR (400 MHz, CD<sub>2</sub>Cl<sub>2</sub>) δ = 9.12 (d, *J* = 8.7 Hz, 1H), 9.09 (s, 1H), 8.05 (br. s, 1H), 7.96 (d, *J* = 8.1 Hz, 1H), 7.83 (dd, *J* = 8.2, 1.8 Hz, 1H), 7.79 (d, *J* = 8.2 Hz, 1H), 7.73 (d, *J* = 7.6 Hz, 1H), 7.65 (dd, *J* = 8.2, 1.4 Hz, 1H), 7.59 – 7.51 (m, 3H), 7.50 – 7.36 (m, 3H), 7.26 – 7.14 (m, 5H), 6.96 (s, 2H), 2.37 (s, 3H), 2.15 (s, 6H) ppm.

<sup>13</sup>C NMR (101 MHz, CD<sub>2</sub>Cl<sub>2</sub>) δ = 144.3 (1Cq), 140.7 (2Cq), 139.9 (1Cq), 138.6 (1Cq), 138.0 (1Cq), 136.6 (1Cq), 133.8 (1Cq), 133.6 (1CH), 131.7 (2CH), 131.4 (1CH), 131.2 (1CH), 130.2 (1CH), 130.1 (1Cq), 129.2 (1CH), 129.1 (1CH), 128.8 (1CH), 128.63 (2CH), 128.57 (1CH), 128.5 (1CH), 127.5 (2CH), 127.3 (1CH), 127.2 (1CH), 127.0 (1CH), 126.1 (1CH), 123.6 (1Cq), 123.5 (1Cq), 122.0 (1Cq), 119.1 (1CH), 92.6 (1Cq), 90.1 (1Cq), 23.0 (2CH<sub>3</sub>), 21.4 (1CH<sub>3</sub>) ppm. The carbon atoms bonded to boron are not observed.

<sup>11</sup>B NMR (161 MHz, CD<sub>2</sub>Cl<sub>2</sub>) δ = 39.27 ppm.

IR (ATR)  $\tilde{\nu}$  = 3383, 2912, 1550, 1474, 1426, 1364, 1364, 1319, 1152, 913, 820, 753, 718, 686 cm<sup>-1</sup>.

HRMS calcd *m/z* for C<sub>39</sub>H<sub>30</sub>BNNa [M+Na]<sup>+</sup>: 546.2370; found (ESI): 546.2384

M. p. = 125 °C

### Compound **5b**

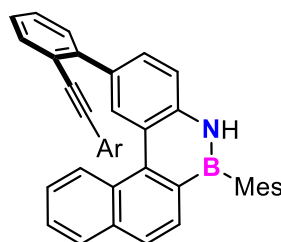

Ar = *p*-(Me)C<sub>6</sub>H<sub>4</sub>

Compound **5b** was synthesized following the general procedure from brominated BN-polyarene **4** (1.30 g, 3.060 mmol, 1.0 equiv.), Pd<sub>2</sub>(dba)<sub>3</sub> (70 mg, 0.077 mmol, 2.5 mol%), S-Phos (188 mg, 0.459 mmol, 15.0 mol%) and arylzinc derivative **S15b** (7.650 mmol, 2.5 equiv.). Silica gel column chromatography (hexane/toluene 5:1 to 3:1) yielded the product (854 mg, 1.590 mmol, 52%) as a white solid.

**<sup>1</sup>H NMR** (400 MHz, CDCl<sub>3</sub>)  $\delta$  = 9.12 (d,  $J$  = 8.5 Hz, 1H), 9.06 (d,  $J$  = 1.6 Hz, 1H), 7.94 (dd,  $J$  = 8.1, 1.0 Hz, 1H), 7.89 (br. s, 1H), 7.81 (dd,  $J$  = 8.3, 1.9 Hz, 1H), 7.76 (d,  $J$  = 8.1 Hz, 1H), 7.72 (dd,  $J$  = 7.6, 1.4 Hz, 1H), 7.68 (d,  $J$  = 8.2 Hz, 1H), 7.54 (ddd,  $J$  = 8.1, 6.9, 1.0 Hz, 1H), 7.50 (dd,  $J$  = 7.6, 1.2 Hz, 1H), 7.47 – 7.38 (m, 3H), 7.36 (td,  $J$  = 7.5, 1.5 Hz, 1H), 7.15 (d,  $J$  = 8.2 Hz, 2H), 6.99 – 6.95 (m, 4H), 2.40 (s, 3H), 2.28 (s, 3H), 2.17 (s, 6H) ppm.

**<sup>13</sup>C NMR** (101 MHz, CDCl<sub>3</sub>)  $\delta$  = 143.9 (1Cq), 140.7 (2Cq), 139.4 (1Cq), 138.42 (1Cq), 138.36 (1Cq), 137.9 (1Cq), 136.3 (1Cq), 133.7 (1Cq), 133.40 (1CH), 131.5 (2CH), 131.20 (1CH), 131.16 (1CH), 129.92 (1CH), 129.86 (1Cq), 129.1 (2CH), 128.9 (1CH), 128.6 (1CH), 128.5 (1CH), 128.4 (1CH), 127.3 (2CH), 127.0 (1CH), 126.9 (1CH), 126.8 (1CH), 125.9 (1CH), 123.5 (1Cq), 122.1 (1Cq), 120.3 (1Cq), 118.7 (1CH), 92.7 (1Cq), 89.3 (1Cq), 23.1 (2CH<sub>3</sub>), 21.6 (1CH<sub>3</sub>), 21.4 (1CH<sub>3</sub>) ppm. The carbon atoms bonded to boron are not observed.

**<sup>11</sup>B NMR** (161 MHz, CDCl<sub>3</sub>)  $\delta$  = 40.76 ppm.

**IR (ATR)**  $\tilde{\nu}$  = 3372, 3022, 2907, 2851, 1608, 1547, 1509, 1469, 1427, 1325, 814, 750 cm<sup>-1</sup>.

**HRMS** calcd  $m/z$  for C<sub>40</sub>H<sub>32</sub>BNNa [M+Na]<sup>+</sup>: 560.2527; found (ESI): 560.2518

**M. p.** = 130 °C

Compound **5c**

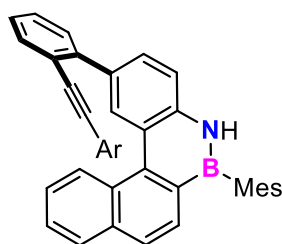

Ar = *p*-(OMe)C<sub>6</sub>H<sub>4</sub>

Compound **5c** was synthesized following the general procedure from brominated BN-polyarene **4** (72 mg, 0.169 mmol, 1.0 equiv.), Pd<sub>2</sub>(dba)<sub>3</sub> (4 mg, 0.004 mmol, 2.5 mol%), S-Phos (10 mg, 0.025 mmol, 15.0 mol%) and arylzinc derivative **S15c** (0.422 mmol, 2.5 equiv.). Silica gel column chromatography (hexane/toluene 5:1 to 3:1) yielded the product (72 mg, 0.130 mmol, 76%) as a white solid.

**<sup>1</sup>H NMR** (400 MHz, CDCl<sub>3</sub>)  $\delta$  = 9.14 (d,  $J$  = 8.6 Hz, 1H), 9.09 (d,  $J$  = 1.4 Hz, 1H), 7.95 (d,  $J$  = 8.1 Hz, 1H), 7.90 (br. s, 1H), 7.81 (dd,  $J$  = 8.3, 2.0 Hz, 1H), 7.77 (d,  $J$  = 8.2 Hz, 1H), 7.74 – 7.67 (m, 2H), 7.57 – 7.52 (m, 1H), 7.50 (dd,  $J$  = 7.6, 1.2 Hz, 1H), 7.45 (d,  $J$  = 8.2 Hz, 1H), 7.44 – 7.39 (m, 2H), 7.36 (td,  $J$  = 7.5, 1.5 Hz, 1H), 7.19 (d,  $J$  = 8.8 Hz, 2H), 6.99 (s, 2H), 6.69 (d,  $J$  = 8.8 Hz, 2H), 3.75 (s, 3H), 2.41 (s, 3H), 2.18 (s, 6H) ppm.

**<sup>13</sup>C NMR** (101 MHz, CDCl<sub>3</sub>)  $\delta$  = 159.6 (1Cq), 143.7 (1Cq), 140.6 (2Cq), 139.4 (1Cq), 138.4 (1Cq), 137.9 (1Cq), 136.3 (1Cq), 133.8 (1Cq), 133.2 (1CH), 133.0 (2CH), 131.20 (1CH), 131.16 (1CH), 129.90 (1CH), 129.85 (1Cq), 128.9 (1CH), 128.5 (1CH), 128.4 (2CH), 127.3 (2CH), 126.94 (1CH), 126.90 (1CH), 126.7 (1CH), 125.9 (1CH), 123.5 (1Cq), 122.3 (1Cq), 118.7 (1CH), 115.6 (1Cq), 114.0 (2CH), 92.5 (1Cq), 88.7 (1Cq), 55.3 (1CH<sub>3</sub>), 23.1 (2CH<sub>3</sub>), 21.4 (1CH<sub>3</sub>) ppm. The carbon atoms bonded to boron are not observed.

**<sup>11</sup>B NMR** (161 MHz, CDCl<sub>3</sub>)  $\delta$  = 40.02 ppm.

**IR (ATR)**  $\tilde{\nu}$  = 3371, 2917, 1606, 1560, 1550, 1507, 1472, 1457, 1437, 1430, 1327, 1288, 1270, 1247, 1175, 1031, 910, 825, 730 cm<sup>-1</sup>.

**HRMS** calcd  $m/z$  for C<sub>40</sub>H<sub>32</sub>BNNaO [M+Na]<sup>+</sup>: 576.2476; found (ESI): 576.2478

## Compound 5d

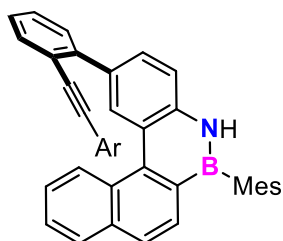

Ar = *p*-(OPh)C<sub>6</sub>H<sub>4</sub>

Compound **5d** was synthesized following the general procedure from brominated BN-polyarene **4** (150 mg, 0.353 mmol, 1.0 equiv.), Pd<sub>2</sub>(dba)<sub>3</sub> (8 mg, 0.009 mmol, 2.5 mol%), S-Phos (22 mg, 0.053 mmol, 15.0 mol%) and arylzinc derivative **S15d** (0.882 mmol, 2.5 equiv.). Silica gel column chromatography (hexane/toluene 5:1 to 3:1) yielded the product (67 mg, 0.109 mmol, 31%) as a yellow solid.

**<sup>1</sup>H NMR** (400 MHz, CDCl<sub>3</sub>)  $\delta$  = 9.12 (d, *J* = 8.6 Hz, 1H), 9.09 (d, *J* = 1.6 Hz, 1H), 7.94 (d, *J* = 7.8 Hz, 1H), 7.89 (br. s, 1H), 7.80 (dd, *J* = 8.2, 1.8 Hz, 1H), 7.75 (d, *J* = 8.2 Hz, 1H), 7.71 (dd, *J* = 7.6, 1.4 Hz, 1H), 7.68 (d, *J* = 8.2 Hz, 1H), 7.58 – 7.53 (m, 1H), 7.52 (dd, *J* = 7.7, 1.4 Hz, 1H), 7.47 – 7.40 (m, 3H), 7.37 (dd, *J* = 7.5, 1.4 Hz, 1H), 7.36 – 7.30 (m, 2H), 7.18 (d, *J* = 8.8 Hz, 2H), 7.12 (t, *J* = 7.4 Hz, 1H), 6.99 – 6.93 (m, 4H), 6.77 (d, *J* = 8.7 Hz, 2H), 2.40 (s, 3H), 2.16 (s, 6H) ppm.

**<sup>13</sup>C NMR** (101 MHz, CDCl<sub>3</sub>)  $\delta$  = 157.5 (1Cq), 156.6 (1Cq), 143.9 (1Cq), 140.6 (2Cq), 139.5 (1Cq), 138.4 (1Cq), 137.9 (1Cq), 136.3 (1Cq), 133.7 (1Cq), 133.3 (1CH), 133.1 (2CH), 131.2 (1CH), 131.1 (1CH), 130.0 (2CH), 129.9 (1CH), 129.8 (1Cq), 128.8 (1CH), 128.7 (1CH), 128.5 (1CH), 128.4 (1CH), 127.3 (2CH), 127.0 (1CH), 126.9 (1CH), 126.8 (1CH), 125.9 (1CH), 123.9 (1CH), 123.5 (1Cq), 122.0 (1Cq), 119.4 (2CH), 118.7 (1CH), 118.5 (2CH), 118.0 (1Cq), 92.1 (1Cq), 89.4 (1Cq), 23.1 (2CH<sub>3</sub>), 21.4 (1CH<sub>3</sub>) ppm. The carbon atoms bonded to boron are not observed.

**<sup>11</sup>B NMR** (161 MHz, CDCl<sub>3</sub>)  $\delta$  = 40.39 ppm.

**IR (ATR)**  $\tilde{\nu}$  = 3366, 3039, 2959, 2911, 2851, 1608, 1585, 1549, 1503, 1486, 1473, 1427, 1234, 821, 750, 691 cm<sup>-1</sup>.

**HRMS** calcd *m/z* for C<sub>45</sub>H<sub>34</sub>BNNaO [M+Na]<sup>+</sup>: 638.2633; found (ESI): 638.2653

**M. p.** = 116 °C

## Compound 5e

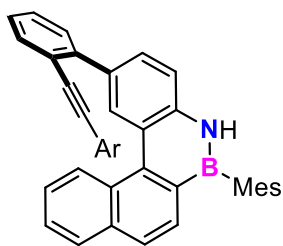

Ar = *p*-(F)C<sub>6</sub>H<sub>4</sub>

Compound **5e** was synthesized following the general procedure from brominated BN-polyarene **4** (150 mg, 0.353 mmol, 1.0 equiv.), Pd<sub>2</sub>(dba)<sub>3</sub> (8 mg, 0.008 mmol, 2.5 mol%), S-Phos (22 mg, 0.053 mmol, 15.0 mol%) and arylzinc derivative **S15e** (0.882 mmol, 2.5 equiv.). Purification by HPLC (acetonitrile/H<sub>2</sub>O 90:10→100:0 over 10 min, flow rate 1.0 mL/min at 295 K) yielded the product (95 mg, 0.176 mmol, 50%) as a white solid.

**<sup>1</sup>H NMR** (400 MHz, CDCl<sub>3</sub>) δ = 9.14 – 9.07 (m, 2H), 7.95 (d, *J* = 7.8 Hz, 1H), 7.90 (br. s, 1H), 7.81 – 7.76 (m, 2H), 7.73 – 7.68 (m, 2H), 7.58 – 7.50 (m, 2H), 7.48 – 7.39 (m, 3H), 7.37 (td, *J* = 7.5, 1.4 Hz, 1H), 7.16 (dd, *J* = 8.9, 5.4 Hz, 2H), 6.98 (s, 2H), 6.83 (t, *J* = 8.7 Hz, 2H), 2.40 (s, 3H), 2.17 (s, 6H) ppm.

**<sup>13</sup>C NMR** (101 MHz, CDCl<sub>3</sub>) δ = 162.4 (d, <sup>1</sup>*J*<sub>C-F</sub> = 249.6 Hz, 1Cq), 143.9 (1Cq), 140.6 (2Cq), 139.5 (1Cq), 138.3 (1Cq), 137.9 (1Cq), 136.4 (1Cq), 133.6 (1Cq), 133.37 (d, <sup>3</sup>*J*<sub>C-F</sub> = 8.4 Hz, 2CH), 133.36 (1CH), 131.3 (1CH), 131.1 (1CH), 129.9 (1CH), 129.8 (1Cq), 128.9 (1CH), 128.8 (1CH), 128.6 (1CH), 128.3 (1CH), 127.4 (2CH), 127.0 (1CH), 126.9 (1CH), 126.8 (1CH), 125.9 (1CH), 123.5 (1Cq), 121.7 (1Cq), 119.5 (d, <sup>4</sup>*J*<sub>Cq-F</sub> = 3.4 Hz, 1Cq), 118.7 (1CH), 115.6 (d, <sup>2</sup>*J*<sub>C-F</sub> = 22.0 Hz, 2CH), 91.4 (1Cq), 89.6 (1Cq), 23.1 (2CH<sub>3</sub>), 21.4 (1CH<sub>3</sub>) ppm. The carbon atoms bonded to boron are not observed.

**<sup>11</sup>B NMR** (161 MHz, CDCl<sub>3</sub>) δ = 39.67 ppm.

**<sup>19</sup>F NMR** (282 MHz, CDCl<sub>3</sub>) δ = -111.03 ppm.

**IR (ATR)**  $\tilde{\nu}$  = 3370, 3045, 2912, 2853, 2728, 1607, 1549, 1505, 1471, 1427, 1227, 1154, 821, 752 cm<sup>-1</sup>.

**HRMS** calcd *m/z* for C<sub>39</sub>H<sub>29</sub>BFNaN [M+Na]<sup>+</sup>: 564.2276; found (ESI): 564.2279

**M.p.** = 123 °C

Compound **5f**

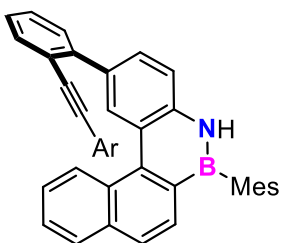

Ar = *p*-(TMS)C<sub>6</sub>H<sub>4</sub>

Compound **5f** was synthesized following the general procedure from brominated BN-polyarene **4** (82 mg, 0.193 mmol, 1.0 equiv.), Pd<sub>2</sub>(dba)<sub>3</sub> (4 mg, 0.005 mmol, 2.5 mol%), S-Phos (12 mg, 0.029 mmol, 15.0 mol%) and arylzinc derivative **S15f** (0.480 mmol, 2.5 equiv.). Silica gel column chromatography (hexane/toluene 5:1 to 3:1) yielded the product (69 mg, 0.116 mmol, 60%) as a white solid.

**<sup>1</sup>H NMR** (300 MHz, CDCl<sub>3</sub>) δ = 9.12 (d, *J* = 8.7 Hz, 1H), 9.04 (s, 1H), 7.94 (d, *J* = 8.0 Hz, 1H), 7.89 (br. s, 1H), 7.83 (dd, *J* = 8.3, 1.9 Hz, 1H), 7.79 – 7.66 (m, 3H), 7.58 – 7.49 (m, 2H), 7.47 – 7.36 (m, 4H), 7.32 (d, *J* = 8.3 Hz, 2H), 7.23 (d, *J* = 7.9 Hz, 2H), 6.98 (s, 2H), 2.40 (s, 3H), 2.18 (s, 6H), 0.21 (s, 9H) ppm.

**<sup>13</sup>C NMR** (101 MHz, CDCl<sub>3</sub>) δ = 144.1 (1Cq), 141.0 (1Cq), 140.6 (2Cq), 139.5 (1Cq), 138.4 (1Cq), 137.9 (1Cq), 136.3 (1Cq), 133.7 (1Cq), 133.4 (1CH), 133.2 (2CH), 131.2 (1CH), 131.1 (1CH), 130.6 (2CH), 129.90 (1CH), 129.86 (1Cq), 128.9 (1CH), 128.8 (1CH), 128.5 (1CH), 128.4 (1CH), 127.3 (2CH), 127.0 (1CH), 126.9 (1CH), 126.8 (1CH), 125.9 (1CH), 123.7 (1Cq),

123.5 (1Cq), 122.0 (1Cq), 118.6 (1CH), 92.7 (1Cq), 90.4 (1Cq), 23.1 (2CH<sub>3</sub>), 21.4 (1CH<sub>3</sub>), -1.1 (3CH<sub>3</sub>) ppm. The carbon atoms bonded to boron are not observed.

<sup>11</sup>B NMR (161 MHz, CDCl<sub>3</sub>) δ = 39.71 ppm.

IR (ATR)  $\tilde{\nu}$  = 3373, 2916, 1610, 1550, 1473, 1429, 1321, 1167, 1126, 1105, 1065, 841, 821, 753 cm<sup>-1</sup>.

HRMS calcd  $m/z$  for C<sub>42</sub>H<sub>38</sub>BNNaSi [M+Na]<sup>+</sup>: 618.2766; found (ESI): 618.2788

M. p. = 138 °C

### Compound **5g**

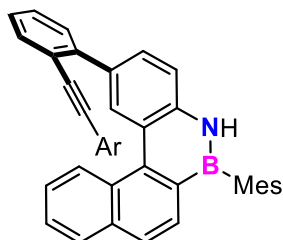

Ar = *p*-(Cl)C<sub>6</sub>H<sub>4</sub>

Compound **5g** was synthesized following the general procedure from brominated BN-polyarene **4** (200 mg, 0.470 mmol, 1.0 equiv.), Pd<sub>2</sub>(dba)<sub>3</sub> (11 mg, 0.012 mmol, 2.5 mol%), S-Phos (29 mg, 0.070 mmol, 15.0 mol%) and arylzinc derivative **S15g** (1.175 mmol, 2.5 equiv.). Silica gel column chromatography (hexane/toluene 5:1 to 3:1) yielded the product (78 mg, 0.140 mmol, 30%) as a white solid.

<sup>1</sup>H NMR (600 MHz, CD<sub>2</sub>Cl<sub>2</sub>) δ = 9.11 (s, 1H), 9.09 (d, *J* = 8.6 Hz, 1H), 8.05 (br. s, 1H), 7.97 (d, *J* = 8.0 Hz, 1H), 7.80 (d, *J* = 8.1 Hz, 2H), 7.71 (d, *J* = 7.6 Hz, 1H), 7.65 (d, *J* = 8.3 Hz, 1H), 7.59 – 7.54 (m, 2H), 7.52 (d, *J* = 8.1 Hz, 1H), 7.48 (t, *J* = 7.4 Hz, 1H), 7.46 – 7.42 (m, 1H), 7.39 (t, *J* = 7.6 Hz, 1H), 7.12 (d, *J* = 8.0 Hz, 2H), 7.09 (d, *J* = 8.7 Hz, 2H), 6.96 (s, 2H), 2.37 (s, 3H), 2.15 (s, 6H) ppm.

<sup>13</sup>C NMR (101 MHz, CDCl<sub>3</sub>) δ = 144.0 (1Cq), 140.6 (2Cq), 139.5 (1Cq), 138.3 (1Cq), 137.9 (1Cq), 136.4 (1Cq), 134.2 (1Cq), 133.5 (1Cq), 133.4 (1CH), 132.7 (2CH), 131.3 (1CH), 131.1 (1CH), 129.9 (1CH), 129.8 (1Cq), 129.0 (1CH), 128.8 (1CH), 128.7 (2CH), 128.6 (1CH), 128.3 (1CH), 127.4 (2CH), 127.0 (1CH), 126.9 (1CH), 126.8 (1CH), 125.9 (1CH), 123.5 (1Cq), 121.9 (1Cq), 121.6 (1Cq), 118.8 (1CH), 91.4 (1Cq), 90.9 (1Cq), 23.1 (2CH<sub>3</sub>), 21.4 (1CH<sub>3</sub>) ppm. The carbon atoms bonded to boron are not observed.

<sup>11</sup>B NMR (161 MHz, CDCl<sub>3</sub>) δ = 39.84 ppm.

IR (ATR)  $\tilde{\nu}$  = 3368, 2912, 1607, 1549, 1489, 1472, 1427, 1090, 822, 753 cm<sup>-1</sup>.

HRMS calcd  $m/z$  for C<sub>39</sub>H<sub>29</sub>BCINNa [M+Na]<sup>+</sup>: 580.1980; found (ESI): 580.2012

M. p. = 115 °C

## Compound 5h

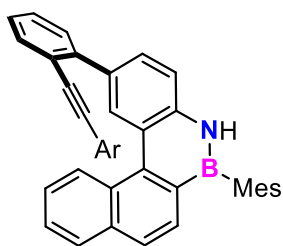

Ar = *p*-(CF<sub>3</sub>)C<sub>6</sub>H<sub>4</sub>

Compound **5h** was synthesized following the general procedure from brominated BN-polyarene **4** (90 mg, 0.212 mmol, 1.0 equiv.), Pd<sub>2</sub>(dba)<sub>3</sub> (5 mg, 0.005 mmol, 2.5 mol%), S-Phos (13 mg, 0.032 mmol, 15.0 mol%) and arylzinc derivative **S15h** (0.530 mmol, 2.5 equiv.). Silica gel column chromatography (hexane/toluene 5:1 to 3:1) yielded the product (53 mg, 0.090 mmol, 42%) as a white solid.

<sup>1</sup>H NMR (600 MHz, CDCl<sub>3</sub>) δ = 9.11 (d, *J* = 1.5 Hz, 1H), 9.09 (d, *J* = 8.6 Hz, 1H), 7.95 (d, *J* = 7.9 Hz, 1H), 7.91 (br. s, 1H), 7.80 – 7.76 (m, 2H), 7.74 (dd, *J* = 7.8, 1.1 Hz, 1H), 7.70 (d, *J* = 8.1 Hz, 1H), 7.57 – 7.53 (m, 2H), 7.50 – 7.45 (m, 2H), 7.44 – 7.36 (m, 4H), 7.26 (d, *J* = 8.1 Hz, 2H), 6.98 (s, 2H), 2.40 (s, 3H), 2.17 (s, 6H) ppm.

<sup>11</sup>B NMR (161 MHz, CDCl<sub>3</sub>) δ = 40.26 ppm.

<sup>19</sup>F NMR (377 MHz, CDCl<sub>3</sub>) δ = -62.82 ppm.

IR (ATR)  $\tilde{\nu}$  = 3369, 3040, 2915, 2851, 1609, 1550, 1472, 1428, 1319, 1166, 1124, 1104, 1065, 840, 821, 752 cm<sup>-1</sup>.

HRMS calcd *m/z* for C<sub>40</sub>H<sub>29</sub>BF<sub>3</sub>NNa [M+Na]<sup>+</sup>: 614.2244; found (ESI): 614.2275

M. p. = 125 °C

## Compound 5i

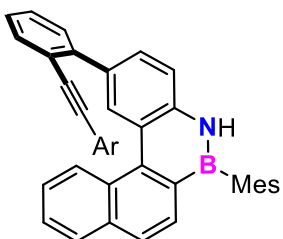

Ar = *o*-(OMe)C<sub>6</sub>H<sub>4</sub>

Compound **5i** was synthesized following the general procedure from brominated BN-polyarene **4** (310 mg, 0.729 mmol, 1.0 equiv.), Pd<sub>2</sub>(dba)<sub>3</sub> (17 mg, 0.018 mmol, 2.5 mol%), S-Phos (45 mg, 0.109 mmol, 15.0 mol%) and arylzinc derivative **S15i** (1.822 mmol, 2.5 equiv.). Silica gel column chromatography (hexane/toluene 3:1 to 1:1) yielded the product (328 mg, 0.593 mmol, 81%) as a yellow solid.

<sup>1</sup>H NMR (300 MHz, CDCl<sub>3</sub>) δ = 9.14 (d, *J* = 8.2 Hz, 1H), 9.05 (s, 1H), 7.96 – 7.83 (m, 3H), 7.80 – 7.72 (m, 2H), 7.67 (d, *J* = 8.3 Hz, 1H), 7.57 – 7.32 (m, 6H), 7.23 – 7.13 (m, 2H), 6.97 (s, 2H), 6.79 – 6.70 (m, 2H), 3.61 (s, 3H), 2.39 (s, 3H), 2.16 (s, 6H) ppm.

<sup>13</sup>C NMR (101 MHz, CDCl<sub>3</sub>) δ = 160.0 (1Cq), 143.9 (1Cq), 140.6 (2Cq), 139.4 (1Cq), 138.5 (1Cq), 137.9 (1Cq), 136.3 (1Cq), 133.8 (1Cq), 133.5 (1CH), 133.4 (1CH), 131.2 (1CH), 131.1

(1CH), 129.90 (1Cq), 129.88 (1CH), 129.7 (1CH), 129.0 (1CH), 128.6 (1CH), 128.5 (1CH), 128.4 (1CH), 127.3 (2CH), 126.90 (1CH), 126.87 (1CH), 126.7 (1CH), 125.8 (1CH), 123.5 (1Cq), 122.4 (1Cq), 120.4 (1CH), 118.6 (1CH), 112.8 (1Cq), 110.7 (1CH), 93.9 (1Cq), 89.0 (1Cq), 55.6 (1CH<sub>3</sub>), 23.1 (2CH<sub>3</sub>), 21.4 (1CH<sub>3</sub>) ppm. The carbon atoms bonded to boron are not observed.

**<sup>11</sup>B NMR** (161 MHz, CDCl<sub>3</sub>)  $\delta$  = 39.71 ppm.

**IR (ATR)**  $\tilde{\nu}$  = 3368, 2911, 1607, 1548, 1471, 1428, 1275, 1244, 1023, 905, 821, 748, 725 cm<sup>-1</sup>.

**HRMS** calcd  $m/z$  for C<sub>40</sub>H<sub>32</sub>BNNaO [M+Na]<sup>+</sup>: 576.2476; found (ESI): 576.2463

**M. p.** = 125 °C

Compound **5j**

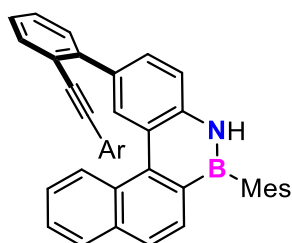

Compound **5j** was synthesized following the general procedure from brominated BN-polyarene **4** (100 mg, 0.235 mmol, 1.0 equiv.), Pd<sub>2</sub>(dba)<sub>3</sub> (5 mg, 0.006 mmol, 2.5 mol%), S-Phos (14 mg, 0.035 mmol, 15.0 mol%) and arylzinc derivative **S15j** (0.587 mmol, 2.5 equiv.). Silica gel column chromatography (hexane/toluene 5:1 to 3:1) yielded the product (43 mg, 0.078 mmol, 33%) as a white solid.

Ar = *m*-(OMe)C<sub>6</sub>H<sub>4</sub>

**<sup>1</sup>H NMR** (400 MHz, CDCl<sub>3</sub>)  $\delta$  = 9.12 (d,  $J$  = 8.7 Hz, 1H), 9.05 (s, 1H), 7.93 (d,  $J$  = 8.1 Hz, 1H), 7.89 (br. s, 1H), 7.82 (dd,  $J$  = 8.4, 1.8 Hz, 1H), 7.78 – 7.71 (m, 2H), 7.68 (d,  $J$  = 7.9 Hz, 1H), 7.54 (t,  $J$  = 7.5 Hz, 1H), 7.51 (dd,  $J$  = 7.8, 1.1 Hz, 1H), 7.48 – 7.41 (m, 3H), 7.37 (td,  $J$  = 7.5, 1.4 Hz, 1H), 7.07 (t,  $J$  = 7.9 Hz, 1H), 6.97 (s, 2H), 6.85 (d,  $J$  = 7.6 Hz, 1H), 6.82 – 6.79 (m, 1H), 6.79 – 6.75 (m, 1H), 3.62 (s, 3H), 2.39 (s, 3H), 2.16 (s, 6H) ppm.

**<sup>13</sup>C NMR** (101 MHz, CDCl<sub>3</sub>)  $\delta$  = 159.3 (1Cq), 144.1 (1Cq), 140.6 (2Cq), 139.5 (1Cq), 138.3 (1Cq), 137.9 (1Cq), 136.3 (1Cq), 133.7 (1Cq), 133.4 (1CH), 131.2 (1CH), 131.1 (1CH), 129.9 (1CH), 129.8 (1Cq), 129.4 (1CH), 128.9 (1CH), 128.8 (1CH), 128.5 (1CH), 128.4 (1CH), 127.3 (2CH), 127.0 (1CH), 126.9 (1CH), 126.8 (1CH), 125.9 (1CH), 124.4 (1Cq), 124.1 (1CH), 123.5 (1Cq), 121.9 (1Cq), 118.7 (1CH), 116.2 (1CH), 115.0 (1CH), 92.4 (1Cq), 89.8 (1Cq), 55.2 (1CH<sub>3</sub>), 23.1 (2CH<sub>3</sub>), 21.4 (1CH<sub>3</sub>) ppm. The carbon atoms bonded to boron are not observed.

**<sup>11</sup>B NMR** (161 MHz, CDCl<sub>3</sub>)  $\delta$  = 40.61 ppm.

**IR (ATR)**  $\tilde{\nu}$  = 3366, 2960, 2907, 1576, 1548, 1473, 1427, 1321, 1260, 1221, 1035, 820, 751, 685, 668 cm<sup>-1</sup>.

**HRMS** calcd  $m/z$  for C<sub>40</sub>H<sub>32</sub>BNNaO [M+Na]<sup>+</sup>: 576.2476; found (ESI): 576.2486

**M. p.** = 119 °C

### Compound **S5b(BPh)**

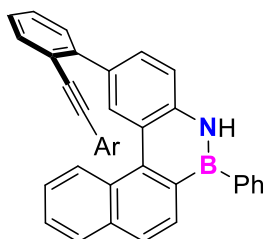

Ar = *p*-(Me)C<sub>6</sub>H<sub>4</sub>

Compound **S5b(BPh)** was synthesized following the general procedure from brominated BN-polyarene **S4(BPh)** (300 mg, 0.783 mmol, 1.0 equiv.), Pd<sub>2</sub>(dba)<sub>3</sub> (18 mg, 0.019 mmol, 2.5 mol%), S-Phos (48 mg, 0.117 mmol, 15.0 mol%) and arylzinc derivative **S15b** (1.957 mmol, 2.5 equiv.). Silica gel column chromatography (hexane/toluene 5:1 to 3:1) yielded the product (226 mg, 0.456 mmol, 58%) as a white solid.

<sup>1</sup>H NMR (300 MHz, CD<sub>2</sub>Cl<sub>2</sub>) δ = 9.09 (d, *J* = 8.6 Hz, 1H), 9.05 (d, *J* = 1.8 Hz, 1H), 8.18 (d, *J* = 8.2 Hz, 1H), 8.13 (br. s, 1H), 8.00 (d, *J* = 8.0 Hz, 1H), 7.94 – 7.79 (m, 4H), 7.70 (dd, *J* = 7.5, 1.5 Hz, 1H), 7.62 – 7.50 (m, 6H), 7.48 – 7.40 (m, 2H), 7.37 (td, *J* = 7.5, 1.5 Hz, 1H), 7.06 (d, *J* = 8.2 Hz, 2H), 6.97 (d, *J* = 8.0 Hz, 2H), 2.26 (s, 3H) ppm.

<sup>13</sup>C NMR (101 MHz, CD<sub>2</sub>Cl<sub>2</sub>) δ = 144.1 (1Cq), 139.7 (1Cq), 139.4 (1Cq), 139.0 (1Cq), 136.4 (1Cq), 133.94 (1Cq), 133.89 (2CH), 133.5 (1CH), 131.5 (2CH), 131.4 (1CH), 131.3 (1CH), 130.1 (1CH), 130.0 (1Cq), 129.4 (2CH), 129.3 (1CH), 129.1 (1CH), 129.0 (1CH), 128.7 (1CH), 128.6 (1CH), 128.5 (2CH), 127.3 (2CH), 126.8 (1CH), 126.1 (1CH), 123.5 (1Cq), 122.2 (1Cq), 120.4 (1Cq), 119.0 (1CH), 92.8 (1Cq), 89.4 (1Cq), 21.5 (1CH<sub>3</sub>) ppm. The carbon atoms bonded to boron are not observed.

<sup>11</sup>B NMR (161 MHz, CD<sub>2</sub>Cl<sub>2</sub>) δ = 37.28 ppm.

IR (ATR)  $\tilde{\nu}$  = 3375, 3049, 2210, 1509, 1548, 1471, 815, 737, 691 cm<sup>-1</sup>.

HRMS calcd *m/z* for C<sub>37</sub>H<sub>26</sub>BN [M]<sup>+</sup>: 495.2159; found (ESI): 495.2163.

M. p. = 130 °C

### Compound **S5b(NMe)**

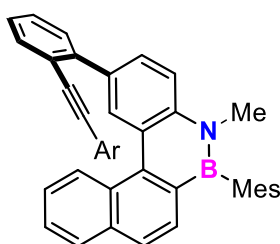

Ar = *p*-(Me)C<sub>6</sub>H<sub>4</sub>

Compound **S5b(NMe)** was synthesized following the general procedure from brominated BN-polyarene **S4(NMe)** (88 mg, 0.200 mmol, 1.0 equiv.), Pd<sub>2</sub>(dba)<sub>3</sub> (5 mg, 0.005 mmol, 2.5 mol%), S-Phos (12 mg, 0.030 mmol, 15.0 mol%) and arylzinc derivative **S15b** (0.500 mmol, 2.5 equiv.). Silica gel column chromatography (hexane/toluene 5:1 to 3:1) yielded the product (70 mg, 0.127 mmol, 63%) as a white solid.

<sup>1</sup>H NMR (600 MHz, CDCl<sub>3</sub>) δ = 9.07 (d, *J* = 2.1 Hz, 1H), 9.05 (d, *J* = 8.4 Hz, 1H), 7.94 (dd, *J* = 8.6, 2.1 Hz, 1H), 7.91 (d, *J* = 8.0 Hz, 1H), 7.82 (d, *J* = 8.7 Hz, 1H), 7.73 – 7.69 (m, 2H), 7.54 – 7.50 (m, 2H), 7.50 (d, *J* = 8.1 Hz, 1H), 7.44 – 7.38 (m, 2H), 7.36 (dd, *J* = 7.6, 1.4 Hz, 1H), 7.12 (d, *J* = 8.2 Hz, 2H), 6.98 – 6.95 (m, 4H), 3.63 (s, 3H), 2.41 (s, 3H), 2.28 (s, 3H), 2.06 (s, 6H) ppm.

<sup>13</sup>C NMR (101 MHz, CDCl<sub>3</sub>) δ = 143.7 (1Cq), 141.7 (1Cq), 139.8 (2Cq), 138.3 (1Cq), 138.1 (1Cq), 137.4 (1Cq), 136.3 (1Cq), 133.4 (1CH), 133.3 (1Cq), 131.5 (1CH), 131.4 (2CH), 131.2 (1CH), 129.9 (1CH), 129.5 (1Cq), 129.1 (2CH), 128.8 (1CH), 128.60 (1CH), 128.59 (1CH), 128.4 (1CH), 127.3 (2CH), 126.9 (1CH), 126.7 (1CH), 126.6 (1CH), 125.8 (1CH), 124.8 (1Cq),

122.1 (1Cq), 120.4 (1Cq), 115.1 (1CH), 92.7 (1Cq), 89.3 (1Cq), 36.7 (1CH<sub>3</sub>), 22.7 (2CH<sub>3</sub>), 21.6 (1CH<sub>3</sub>), 21.5 (1CH<sub>3</sub>) ppm. The carbon atoms bonded to boron are not observed.

<sup>11</sup>B NMR (161 MHz, CDCl<sub>3</sub>) δ = 41.07 ppm.

IR (ATR)  $\tilde{\nu}$  = 3049, 2910, 2851, 1608, 1547, 1508, 1469, 1291, 814, 751 cm<sup>-1</sup>.

HRMS calcd *m/z* for C<sub>41</sub>H<sub>34</sub>BNNa [M+Na]<sup>+</sup>: 574.2683; found (ESI): 574.2698

M. p. = 125 °C

#### Compound **7b**

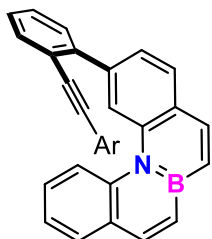

Compound **7b** was synthesized following the general procedure from chlorinated BN-polyarene **6** (400 mg, 1.520 mmol, 1.0 equiv.), Pd<sub>2</sub>(dba)<sub>3</sub> (35 mg, 0.038 mmol, 2.5 mol%), S-Phos (94 mg, 0.228 mmol, 15.0 mol%) and arylzinc derivative **S15b** (3.801 mmol, 2.5 equiv.). Silica gel column chromatography (hexane/toluene 10:1) yielded the product (354 mg, 0.845 mmol, 56%) as a yellow solid.

Ar = *p*-(Me)C<sub>6</sub>H<sub>4</sub> <sup>1</sup>H NMR (400 MHz, CDCl<sub>3</sub>) δ = 8.80 (d, *J* = 1.5 Hz, 1H), 8.65 (dd, *J* = 7.8, 1.3 Hz, 1H), 8.09 (d, *J* = 11.2 Hz, 1H), 8.01 (d, *J* = 11.2 Hz, 1H), 7.86 (d, *J* = 8.1 Hz, 1H), 7.73 (dd, *J* = 7.2, 2.1 Hz, 1H), 7.70 – 7.66 (m, 1H), 7.63 (dd, *J* = 7.9, 1.6 Hz, 1H), 7.44 – 7.33 (m, 3H), 7.29 – 7.19 (m, 4H), 7.14 (d, *J* = 8.2 Hz, 2H), 7.01 (d, *J* = 8.0 Hz, 2H), 2.29 (s, 3H) ppm.

<sup>13</sup>C NMR (101 MHz, CDCl<sub>3</sub>) δ = 143.6 (1Cq), 143.2 (1CH), 143.0 (1CH), 139.4 (1Cq), 138.9 (1Cq), 138.7 (1Cq), 138.5 (1Cq), 133.2 (1CH), 131.4 (2CH), 129.9 (1CH), 129.8 (1CH), 129.6 (1Cq), 129.5 (1CH), 129.2 (2CH), 128.8 (1Cq), 128.5 (1CH), 127.4 (1CH), 126.7 (1CH), 124.3 (1CH), 123.0 (1CH), 122.2 (1Cq), 122.1 (1CH), 121.5 (1CH), 120.2 (1Cq), 92.9 (1Cq), 89.0 (1Cq), 21.6 (1CH<sub>3</sub>) ppm. The carbon atoms bonded to boron are not observed.

<sup>11</sup>B NMR (161 MHz, CDCl<sub>3</sub>) δ = 31.36 ppm.

IR (ATR)  $\tilde{\nu}$  = 3019, 2918, 2862, 1592, 1555, 1532, 1509, 1475, 1431, 1342, 1282, 1263, 1213, 1165, 894, 828, 817, 799, 753, 735 cm<sup>-1</sup>.

HRMS calcd *m/z* for C<sub>31</sub>H<sub>22</sub>BNNa [M+Na]<sup>+</sup>: 442.1743; found (ESI): 442.1763

#### Compound **7c**

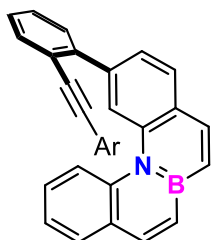

Compound **7c** was synthesized following the general procedure from chlorinated BN-polyarene **6** (100 mg, 0.380 mmol, 1.0 equiv.), Pd<sub>2</sub>(dba)<sub>3</sub> (9 mg, 0.009 mmol, 2.5 mol%), S-Phos (23 mg, 0.057 mmol, 15.0 mol%) and arylzinc derivative **S15c** (0.950 mmol, 2.5 equiv.). Silica gel column chromatography (hexane/toluene 10:1) yielded the product (69 mg, 0.159 mmol, 42%) as a white solid.

Ar = *p*-(OMe)C<sub>6</sub>H<sub>4</sub> <sup>1</sup>H NMR (400 MHz, CDCl<sub>3</sub>) δ = 8.81 (d, *J* = 1.2 Hz, 1H), 8.65 (dd, *J* = 7.7, 1.4 Hz, 1H), 8.09 (d, *J* = 11.2 Hz, 1H), 8.01 (d, *J* = 11.0 Hz, 1H), 7.86 (d, *J*

= 8.1 Hz, 1H), 7.75 – 7.71 (m, 1H), 7.68 – 7.65 (m, 1H), 7.63 (dd,  $J = 8.0, 1.6$  Hz, 1H), 7.44 – 7.41 (m, 1H), 7.40 – 7.32 (m, 2H), 7.29 – 7.19 (m, 4H), 7.17 (d,  $J = 8.9$  Hz, 2H), 6.73 (d,  $J = 8.9$  Hz, 2H), 3.76 (s, 3H) ppm.

$^{13}\text{C}$  NMR (101 MHz,  $\text{CDCl}_3$ )  $\delta = 159.7$  (1Cq), 143.4 (1Cq), 143.1 (1CH), 143.0 (1CH), 139.4 (1Cq), 138.9 (1Cq), 138.6 (1Cq), 133.1 (1CH), 133.0 (2CH), 129.84 (1CH), 129.77 (1CH), 129.6 (1Cq), 129.5 (1CH), 128.8 (1Cq), 128.3 (1CH), 127.4 (1CH), 126.7 (1CH), 124.3 (1CH), 123.0 (1CH), 122.4 (1Cq), 122.1 (1CH), 121.5 (1CH), 115.4 (1Cq), 114.1 (2CH), 92.7 (1Cq), 88.4 (1Cq), 55.4 (1CH<sub>3</sub>) ppm. The carbon atoms bonded to boron are not observed.

$^{11}\text{B}$  NMR (128 MHz,  $\text{CDCl}_3$ )  $\delta = 30.69$  ppm.

HRMS calcd  $m/z$  for  $\text{C}_{31}\text{H}_{23}\text{BNO}$   $[\text{M}+\text{H}]^+$ : 436.1869; found (ESI): 436.1872

### Compound 7e

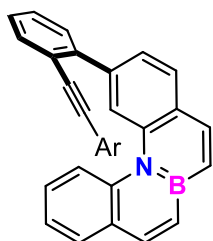

Compound **7e** was synthesized following the general procedure from chlorinated BN-polyarene **6** (50 mg, 0.190 mmol, 1.0 equiv.),  $\text{Pd}_2(\text{dba})_3$  (4 mg, 0.005 mmol, 2.5 mol%), S-Phos (12 mg, 0.028 mmol, 15.0 mol%) and arylzinc derivative **S15e** (0.475 mmol, 2.5 equiv.). HPLC purification (acetonitrile:H<sub>2</sub>O 90:10→100:0 over 10 min, flow rate 1.0 mL/min at 295 K) yielded the product (44 mg, 0.104 mmol, 55%) as a white solid.

Ar =  $p\text{-(F)C}_6\text{H}_4$   $^1\text{H}$  NMR (400 MHz,  $\text{CDCl}_3$ )  $\delta = 8.81$  (s, 1H), 8.62 – 8.57 (m, 1H), 8.06 (d,  $J = 11.2$  Hz, 1H), 7.99 (d,  $J = 11.2$  Hz, 1H), 7.83 (d,  $J = 8.1$  Hz, 1H), 7.73 – 7.68 (m, 1H), 7.63 (dd,  $J = 7.5, 1.4$  Hz, 1H), 7.58 (dd,  $J = 8.1, 1.6$  Hz, 1H), 7.43 (dd,  $J = 7.6, 1.6$  Hz, 1H), 7.38 (td,  $J = 7.5, 1.5$  Hz, 1H), 7.32 (td,  $J = 7.4, 1.7$  Hz, 1H), 7.25 – 7.17 (m, 4H), 7.13 (dd,  $J = 8.8, 5.4$  Hz, 2H), 6.85 (t,  $J = 8.8$  Hz, 2H) ppm.

$^{13}\text{C}$  NMR (101 MHz,  $\text{CDCl}_3$ )  $\delta = 162.52$  (d,  $^1J_{\text{C-F}} = 249.7$  Hz, 1Cq), 143.67 (1Cq), 143.16 (1CH), 142.92 (1CH), 139.16 (1Cq), 138.81 (1Cq), 138.64 (1Cq), 133.31 (d,  $^3J_{\text{C-F}} = 8.4$  Hz, 2CH), 133.19 (1CH), 129.86 (1CH), 129.83 (1CH), 129.67 (1Cq), 129.57 (1CH), 128.87 (1Cq), 128.78 (1CH), 127.46 (1CH), 126.63 (1CH), 124.25 (1CH), 123.06 (1CH), 121.96 (1CH), 121.81 (1Cq), 121.41 (1CH), 119.36 (d,  $^4J_{\text{Cq-F}} = 3.3$  Hz, 1Cq), 115.71 (d,  $^2J_{\text{C-F}} = 22.1$  Hz, 2CH), 91.62 (1Cq), 89.28 (d,  $^5J_{\text{Cq-F}} = 1.4$  Hz, 1Cq) ppm. The carbon atoms bonded to boron are not observed.

$^{11}\text{B}$  NMR (161 MHz,  $\text{CDCl}_3$ )  $\delta = 30.83$  ppm.

$^{19}\text{F}$  NMR (282 MHz,  $\text{CDCl}_3$ )  $\delta = -110.82$  ppm.

IR (ATR)  $\tilde{\nu} = 3014, 1591, 1550, 1506, 1473, 1219, 1154, 1092, 834, 810, 757, 736$  cm<sup>-1</sup>.

HRMS calcd  $m/z$  for  $\text{C}_{30}\text{H}_{19}\text{BFNNa}$   $[\text{M}+\text{Na}]^+$ : 446.1492; found (ESI): 446.1490

## Compound **7h**

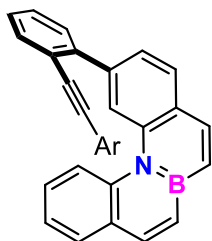

Compound **7h** was synthesized following the general procedure from chlorinated BN-polyarene **6** (50 mg, 0.190 mmol, 1.0 equiv.), Pd<sub>2</sub>(dba)<sub>3</sub> (4 mg, 0.005 mmol, 2.5 mol%), S-Phos (12 mg, 0.028 mmol, 15.0 mol%) and arylzinc derivative **S15h** (0.475 mmol, 2.5 equiv.). Silica gel column chromatography (hexane/toluene 10:1) yielded the product (58 mg, 0.123 mmol, 64%) as a white solid.

Ar = *p*-(CF<sub>3</sub>)C<sub>6</sub>H<sub>4</sub>

**<sup>1</sup>H NMR** (400 MHz, CDCl<sub>3</sub>) δ = 8.84 (d, *J* = 1.5 Hz, 1H), 8.63 – 8.58 (m, 1H), 8.09 (d, *J* = 11.1 Hz, 1H), 8.02 (d, *J* = 11.3 Hz, 1H), 7.87 (d, *J* = 8.0 Hz, 1H), 7.76 – 7.72 (m, 1H), 7.69 (dd, *J* = 7.6, 1.0 Hz, 1H), 7.62 (dd, *J* = 8.0, 1.6 Hz, 1H), 7.51 – 7.42 (m, 4H), 7.38 (td, *J* = 7.4, 1.7 Hz, 1H), 7.31 – 7.23 (m, 6H) ppm.

**<sup>13</sup>C NMR** (126 MHz, CDCl<sub>3</sub>) δ = 144.0 (1Cq), 143.2 (1CH), 142.9 (1CH), 138.9 (1Cq), 138.8 (1Cq), 138.7 (1Cq), 133.4 (1CH), 131.6 (2CH), 131.1 (br, 1CH-B), 130.7 (br, 1CH-B), 129.90 (1CH), 129.88 (1CH), 129.85 (q, <sup>2</sup>*J*<sub>C-F</sub> = 32.8 Hz, 1Cq), 129.7 (1Cq), 129.6 (1CH), 129.3 (1CH), 129.0 (1Cq), 127.5 (1CH), 127.0 (1Cq), 126.6 (1CH), 125.3 (q, <sup>3</sup>*J*<sub>C-F</sub> = 3.8 Hz, 2CH), 124.2 (1CH), 124.0 (q, <sup>1</sup>*J*<sub>C-F</sub> = 272.1 Hz, 1Cq), 123.1 (1CH), 121.9 (1CH), 121.4 (1CH), 121.3 (1Cq), 92.0 (1Cq), 91.3 (1Cq) ppm.

**<sup>11</sup>B NMR** (161 MHz, CDCl<sub>3</sub>) δ = 31.22 ppm.

**<sup>19</sup>F NMR** (377 MHz, CDCl<sub>3</sub>) δ = -62.85 ppm.

**IR (ATR)**  $\tilde{\nu}$  = 1590, 1320, 1166, 1101, 1065, 1015, 949, 908, 836, 811, 754, 744 cm<sup>-1</sup>.

**HRMS** calcd *m/z* for C<sub>31</sub>H<sub>19</sub>BF<sub>3</sub>NNa [M+Na]<sup>+</sup>: 496.1460; found (ESI): 496.1455

**M. p.** = 130 °C

## 2.4. Au-catalyzed hydroarylation reaction towards azabora[5]helicenes **1a-j**, **1b(BPh)**, **1b(NMe)** and **2b-h**

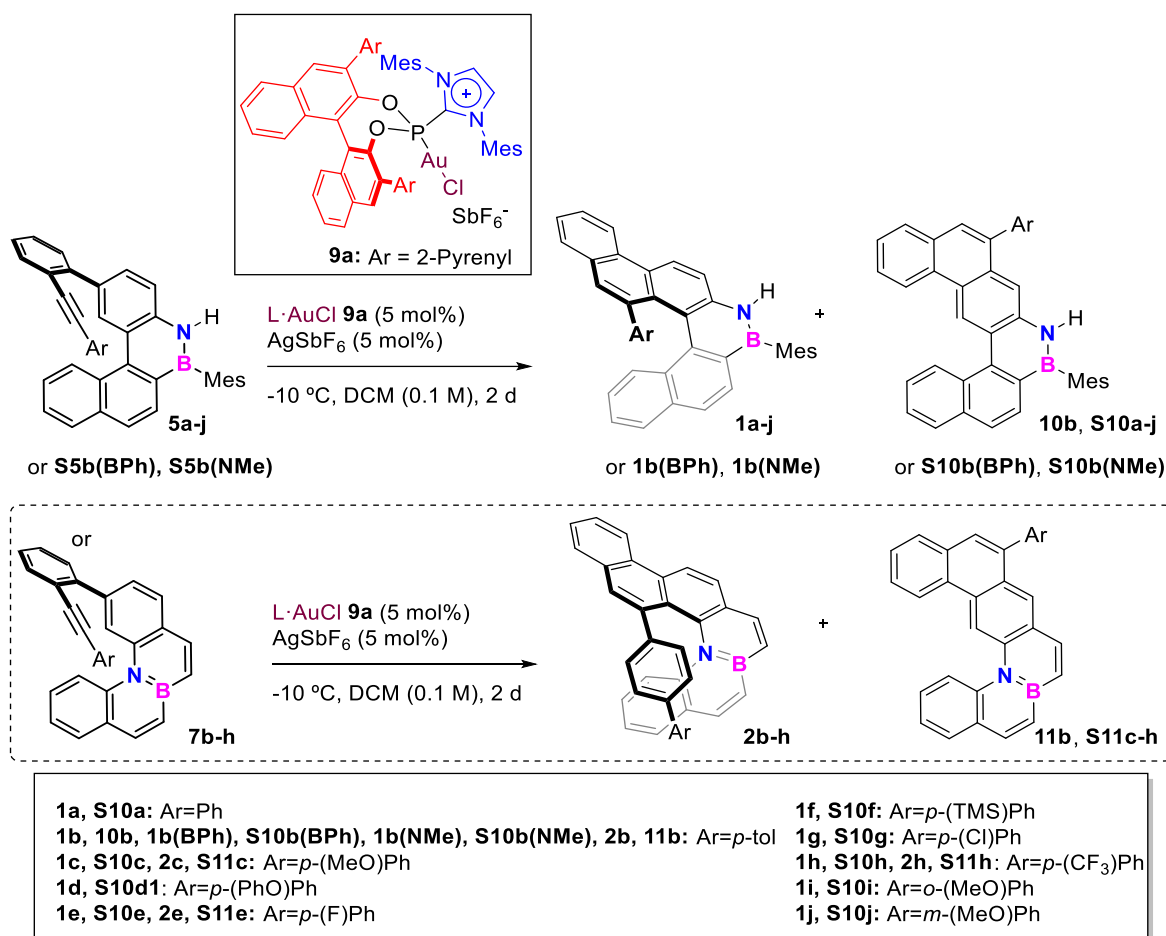

### Scheme S5 Synthesis of azabora[5]helicenes with chiral gold catalyst **9a**.

**General protocol.** In a Schlenk flask equipped with a stirring bar, the respective helicene precursors (25  $\mu\text{mol}$ , 1.0 equiv.) and the chiral gold catalyst **9a** (1.8 mg, 5.0 mol%) were thoroughly dried under vacuo for 30 min. The mixture was dissolved in anhydrous DCM (0.1M, 0.25 mL) and cooled to the desired temperature (-10  $^\circ\text{C}$ , unless otherwise stated). A freshly prepared solution of  $\text{AgSbF}_6$  (0.05 M in DCM, 25  $\mu\text{L}$ , 5.0 mol%) was added dropwise. The reaction mixture was stirred for 48 h, then filtered through a plug of silica using DCM as eluent. The solvent was removed under reduced pressure and purification by preparative HPLC afforded the isolated helicenes.

For enantiomeric excess (ee) determination, racemic reactions were performed with achiral gold catalyst  $\text{Au}(\text{PPh}_3)\text{Cl}$ <sup>[18]</sup> under the same procedure except the reaction were performed at room temperature.

### Azabora[5]helicene (+)-**1a**

The product was obtained following the general procedure from **5a** (13.1 mg, 25  $\mu\text{mol}$ ). NMR analysis of the crude mixture showed a regioselectivity of 88:12 (**1a**:**S10a**). The product was isolated as a white solid (10.5 mg, 20  $\mu\text{mol}$ , 80%) with **93% ee** after purification by HPLC (acetonitrile:H<sub>2</sub>O 95:5 $\rightarrow$ 100:0 over 5 min, flow rate 1.0 mL/min at 295 K).

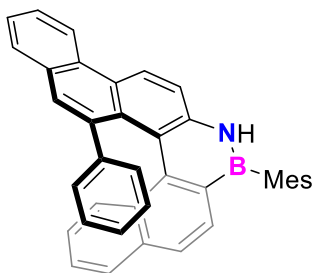

**<sup>1</sup>H NMR** (500 MHz, CD<sub>2</sub>Cl<sub>2</sub>, -35 °C)  $\delta$  = 8.88 (d,  $J$  = 8.9 Hz, 1H), 8.78 (d,  $J$  = 8.3 Hz, 1H), 8.13 (s, 1H), 7.95 (d,  $J$  = 7.5 Hz, 1H), 7.75 (d,  $J$  = 8.6 Hz, 1H), 7.72 (ddd,  $J$  = 8.3, 7.0, 1.4 Hz, 1H), 7.62 (ddd,  $J$  = 7.9, 7.0, 0.8 Hz, 1H), 7.54 (d,  $J$  = 7.8 Hz, 1H), 7.52 – 7.48 (m, 2H), 7.36 (ddd,  $J$  = 8.0, 6.8, 1.1 Hz, 1H), 7.34 (d,  $J$  = 8.0 Hz, 1H), 7.31 (d,  $J$  = 8.2 Hz, 1H), 7.09 (ddd,  $J$  = 8.3, 6.8, 1.4 Hz, 1H), 6.96 (s, 1H), 6.92 (s, 1H), 6.68 (td,  $J$  = 7.5, 1.1 Hz, 1H), 6.62 (tt,  $J$  = 7.4, 1.2 Hz, 1H), 6.55 (d,  $J$  = 7.6 Hz, 1H), 6.31 (td,  $J$  = 7.6, 1.1 Hz, 1H), 5.95 (d,  $J$  = 7.8 Hz, 1H), 2.34 (s, 3H), 2.27 (s, 3H), 2.03 (s, 3H) ppm.

**<sup>1</sup>H NMR** (300 MHz, CD<sub>2</sub>Cl<sub>2</sub>)  $\delta$  = 8.89 (d,  $J$  = 8.9 Hz, 1H), 8.79 (d,  $J$  = 8.3 Hz, 1H), 8.06 (s, 1H), 7.96 (d,  $J$  = 7.8 Hz, 1H), 7.78 – 7.69 (m, 2H), 7.63 (t,  $J$  = 7.1 Hz, 1H), 7.59 – 7.48 (m, 3H), 7.43 – 7.30 (m, 3H), 7.11 (t,  $J$  = 7.8 Hz, 1H), 6.99 (s, 1H), 6.94 (s, 1H), 6.68 – 6.61 (m, 1H), 6.78 – 5.88 (m, 4H), 2.37 (s, 3H), 2.31 (s, 3H), 2.07 (s, 3H) ppm.

**<sup>13</sup>C NMR** (126 MHz, CD<sub>2</sub>Cl<sub>2</sub>, -35 °C)  $\delta$  = 141.7 (1Cq), 140.5 (1Cq), 140.1 (1Cq), 139.4 (1Cq), 139.1 (1Cq), 138.8 (1Cq), 137.6 (1Cq), 135.8 (br, 1Cq-B), 133.9 (1Cq), 131.2 (br, 1Cq-B), 131.1 (1Cq), 130.3 (1Cq), 129.9 (1Cq), 129.82 (1CH), 129.76 (1Cq), 129.0 (1CH), 128.5 (1CH), 127.6 (1CH), 127.2 (1CH), 127.1 (1CH), 127.0 (1CH), 126.9 (1CH), 126.8 (1CH), 126.7 (1CH), 126.3 (1Cq), 126.1 (2CH), 126.0 (1CH), 125.9 (1CH), 125.6 (1CH), 125.0 (1CH), 124.9 (1CH), 122.9 (1CH), 122.5 (1CH), 118.7 (1CH), 116.9 (1Cq), 22.7 (1CH<sub>3</sub>), 22.6 (1CH<sub>3</sub>), 21.1 (1CH<sub>3</sub>) ppm.

**<sup>11</sup>B NMR** (161 MHz, CD<sub>2</sub>Cl<sub>2</sub>)  $\delta$  = 40.26 ppm.

**IR (ATR)**  $\tilde{\nu}$  = 3369, 2915, 2848, 1550, 1489, 1457, 1276, 1258, 750 cm<sup>-1</sup>.

**HRMS** calcd  $m/z$  for C<sub>39</sub>H<sub>30</sub>BNNa [M+Na]<sup>+</sup>: 546.2370; found (ESI) 546.2352

**$[\alpha]_{25}^D$** : +615° (c = 0.07 in DCM) for **93% ee**.

### Azabora[5]helicene (+)-1b

The product was obtained following the general procedure from **5b** (13.0 mg, 25  $\mu$ mol). NMR analysis of the crude mixture showed a regioselectivity of 85:15 (**1b**:**10b**). The product was isolated as a white solid (9.0 mg, 17  $\mu$ mol, 70%) with **97% ee** after purification by HPLC (acetonitrile:H<sub>2</sub>O 95:5→100:0 over 5 min, flow rate 1.0 mL/min at 295 K).

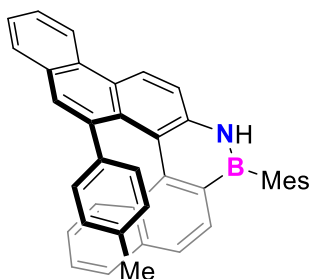

**<sup>1</sup>H NMR** (600 MHz, CD<sub>2</sub>Cl<sub>2</sub>, -35 °C)  $\delta$  = 8.86 (d,  $J$  = 9.2 Hz, 1H), 8.77 (d,  $J$  = 8.2 Hz, 1H), 8.11 (s, 1H), 7.93 (d,  $J$  = 7.8 Hz, 1H), 7.73 (d,  $J$  = 8.6 Hz, 1H), 7.70 (ddd,  $J$  = 8.3, 6.9, 1.4 Hz, 1H), 7.61 (ddd,  $J$  = 7.9, 6.9, 1.0 Hz, 1H), 7.54 (dd,  $J$  = 8.1, 0.8 Hz, 1H), 7.50 (s, 1H), 7.46 (d,  $J$  = 8.4 Hz, 1H), 7.36 – 7.32 (m, 3H), 7.06 (ddd,  $J$  = 8.3, 6.7, 1.3 Hz, 1H), 6.97 (s, 1H), 6.93 (s, 1H), 6.46 (d,  $J$  = 7.9 Hz, 1H), 6.41 (dd,  $J$  = 7.8, 2.0 Hz, 1H), 6.07 (d,  $J$  = 7.9 Hz, 1H), 5.80 (dd,  $J$  = 7.8, 2.0 Hz, 1H), 2.34 (s, 3H), 2.27 (s, 3H), 2.04 (s, 3H), 2.00 (s, 3H) ppm.

**<sup>1</sup>H NMR** (300 MHz, CD<sub>2</sub>Cl<sub>2</sub>)  $\delta$  = 8.88 (d,  $J$  = 8.9 Hz, 1H), 8.78 (d,  $J$  = 8.5 Hz, 1H), 8.04 (s, 1H), 7.95 (d,  $J$  = 8.0 Hz, 1H), 7.78 – 7.68 (m, 2H), 7.66 – 7.49 (m, 4H), 7.43 – 7.33 (m, 3H),

7.09 (ddd,  $J = 8.3, 6.9, 1.2$  Hz, 1H), 6.99 (s, 1H), 6.95 (s, 1H), 6.12 (br. m, 4H), 2.38 (s, 3H), 2.31 (s, 3H), 2.07 (s, 3H), 2.03 (s, 3H) ppm.

$^{13}\text{C}$  NMR (151 MHz,  $\text{CD}_2\text{Cl}_2$ ,  $-35$  °C)  $\delta = 140.5$  (1Cq), 140.0 (1Cq), 139.3 (1Cq), 139.0 (1Cq), 138.7 (1Cq), 138.6 (1Cq), 137.6 (1Cq), 135.9 (br, 1Cq-B), 134.4 (1Cq), 133.8 (1Cq), 131.1 (1Cq), 131.0 (br, 1Cq-B), 130.4 (1Cq), 130.0 (1Cq), 129.8 (1Cq), 129.3 (1CH), 129.0 (1CH), 128.3 (1CH), 127.5 (1CH), 127.4 (1CH), 127.0 (1CH), 126.9 (1CH), 126.8 (1CH), 126.6 (1CH), 126.5 (1CH), 126.30 (1Cq), 126.25 (1CH), 126.02 (1CH), 125.97 (1CH), 125.74 (1CH), 125.70 (1CH), 125.0 (1CH), 122.9 (1CH), 122.5 (1CH), 118.6 (1CH), 116.9 (1Cq), 22.65 (1CH<sub>3</sub>), 22.57 (1CH<sub>3</sub>), 21.1 (1CH<sub>3</sub>), 20.4 (1CH<sub>3</sub>) ppm.

$^{11}\text{B}$  NMR (161 MHz,  $\text{CD}_2\text{Cl}_2$ )  $\delta = 39.25$  ppm.

IR (ATR)  $\tilde{\nu} = 3375, 3043, 2915, 2853, 1608, 1550, 1490, 1457, 1411, 1329, 1245, 1043, 814$   $\text{cm}^{-1}$ .

HRMS calcd  $m/z$  for  $\text{C}_{40}\text{H}_{32}\text{BNNa}$  [ $\text{M}+\text{Na}$ ]<sup>+</sup>: 560.2527; found (ESI) 560.2535

$[\alpha]_{25}^D$ : + 598° ( $c = 0.02$  in DCM) for 97% *ee*.

### Azabora[5]helicene (+)-1c

The product was obtained following the general procedure from **5c** (13.8 mg, 25  $\mu\text{mol}$ ). NMR analysis of the crude mixture showed a regioselectivity of 71:29 (**1c**:**S10c**). The product was isolated as a white solid (9.0 mg, 16  $\mu\text{mol}$ , 65%) with 95% *ee* after purification by HPLC (acetonitrile:H<sub>2</sub>O 95:5→100:0 over 5 min, flow rate 1.0 mL/min at 295 K).

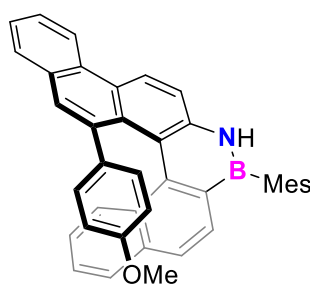

$^1\text{H}$  NMR (600 MHz,  $\text{CD}_2\text{Cl}_2$ ,  $-35$  °C)  $\delta = 8.86$  (d,  $J = 9.2$  Hz, 1H), 8.76 (d,  $J = 8.3$  Hz, 1H), 8.13 (s, 1H), 7.93 (d,  $J = 7.5$  Hz, 1H), 7.74 (d,  $J = 8.6$  Hz, 1H), 7.70 (ddd,  $J = 8.4, 7.0, 1.4$  Hz, 1H), 7.61 (ddd,  $J = 7.8, 7.1, 1.0$  Hz, 1H), 7.58 (d,  $J = 8.1$  Hz, 1H), 7.48 – 7.45 (m, 2H), 7.39 – 7.34 (m, 3H), 7.07 (ddd,  $J = 8.3, 6.8, 1.3$  Hz, 1H), 6.96 (s, 1H), 6.93 (s, 1H), 6.47 (dd,  $J = 8.4, 2.3$  Hz, 1H), 6.21 (dd,  $J = 8.4, 2.7$  Hz, 1H), 5.86 (dd,  $J = 8.5, 2.4$  Hz, 1H), 5.81 (dd,  $J = 8.5, 2.8$  Hz, 1H), 3.56 (s, 3H), 2.34 (s, 3H), 2.27 (s, 3H), 2.04 (s, 3H) ppm.

$^1\text{H}$  NMR (300 MHz,  $\text{CD}_2\text{Cl}_2$ )  $\delta = 8.88$  (d,  $J = 8.7$  Hz, 1H), 8.78 (d,  $J = 8.9$  Hz, 1H), 8.05 (s, 1H), 7.94 (d,  $J = 7.9$  Hz, 1H), 7.77 – 7.67 (m, 2H), 7.66 – 7.57 (m, 2H), 7.55 – 7.48 (m, 2H), 7.45 – 7.34 (m, 3H), 7.14 – 7.06 (m, 1H), 6.99 (s, 1H), 6.95 (s, 1H), 6.00 (br. m, 4H), 3.59 (s, 3H), 2.37 (s, 3H), 2.31 (s, 3H), 2.07 (s, 3H) ppm.

$^{13}\text{C}$  NMR (151 MHz,  $\text{CD}_2\text{Cl}_2$ ,  $-35$  °C)  $\delta = 156.6$  (1Cq), 140.5 (1Cq), 140.1 (1Cq), 139.3 (1Cq), 139.1 (1Cq), 138.3 (1Cq), 137.6 (1Cq), 135.8 (br, 1Cq-B), 134.4 (1Cq), 133.9 (1Cq), 131.1 (1Cq), 130.5 (1Cq), 130.1 (1Cq), 129.7 (1Cq), 129.14 (1CH), 129.11 (1CH), 128.3 (1CH), 128.0 (1CH), 127.6 (1CH), 127.05 (1CH), 127.03 (1CH), 126.9 (1CH), 126.6 (1CH), 126.5 (1CH), 126.3 (1Cq), 126.1 (1CH), 126.0 (1CH), 125.8 (1CH), 125.0 (1CH), 122.9 (1CH), 122.5 (1CH), 118.6 (1CH), 116.8 (1Cq), 112.1 (1CH), 111.1 (1CH), 55.1 (1CH<sub>3</sub>), 22.7 (1CH<sub>3</sub>), 22.6 (1CH<sub>3</sub>), 21.1 (1CH<sub>3</sub>) ppm. One carbon atom bonded to boron is not observed.

$^{11}\text{B}$  NMR (161 MHz,  $\text{CD}_2\text{Cl}_2$ )  $\delta = 39.54$  ppm.

**IR (ATR)**  $\tilde{\nu}$  = 3371, 3041, 2925, 1609, 1549, 1507, 1489, 1456, 1332, 1242, 1174, 1041, 818, 805, 745  $\text{cm}^{-1}$ .

**HRMS** calcd  $m/z$  for  $\text{C}_{40}\text{H}_{32}\text{BNNaO}$   $[\text{M}+\text{Na}]^+$ : 576.2476; found (ESI) 576.2487

$[\alpha]_{25}^D$ : + 559° ( $c = 0.02$  in DCM) for **95% ee**.

### Azabora[5]helicene (+)-1d

The product was obtained following the general procedure from **5d** (15.4 mg, 25  $\mu\text{mol}$ ). NMR analysis of the crude mixture showed a regioselectivity of 81:19 (**1d**:**S10d**). The product was isolated as a white solid (11.5 mg, 19  $\mu\text{mol}$ , 75%) with **93% ee** after purification by HPLC (acetonitrile:H<sub>2</sub>O 95:5→100:0 over 5 min, flow rate 1.0 mL/min at 295 K).

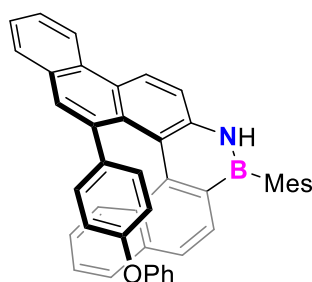

**<sup>1</sup>H NMR** (500 MHz, THF, -35 °C)  $\delta$  = 10.10 (s, 1H), 9.02 (d,  $J = 9.0$  Hz, 1H), 8.90 (d,  $J = 8.2$  Hz, 1H), 7.99 (d,  $J = 7.5$  Hz, 1H), 7.91 (d,  $J = 8.7$  Hz, 1H), 7.78 – 7.68 (m, 2H), 7.64 – 7.57 (m, 3H), 7.56 (s, 1H), 7.52 (d,  $J = 8.0$  Hz, 1H), 7.43 – 7.36 (m, 3H), 7.16 (t,  $J = 7.1$  Hz, 1H), 7.06 (t,  $J = 7.3$  Hz, 1H), 6.92 (d,  $J = 10.3$  Hz, 2H), 6.83 (d,  $J = 7.7$  Hz, 2H), 6.62 (dd,  $J = 8.3, 2.4$  Hz, 1H), 6.37 (dd,  $J = 8.5, 2.5$  Hz, 1H), 6.05 (dd,  $J = 8.4, 2.5$  Hz, 1H), 6.00 (dd,  $J = 8.4, 2.2$  Hz, 1H), 2.34 (s, 3H), 2.24 (s, 3H), 2.08 (s, 3H) ppm.

**<sup>1</sup>H NMR** (400 MHz, THF)  $\delta$  9.78 (s, 1H), 8.94 (d,  $J = 8.9$  Hz, 1H), 8.83 (d,  $J = 8.2$  Hz, 1H), 7.94 (d,  $J = 7.5$  Hz, 1H), 7.89 (d,  $J = 8.6$  Hz, 1H), 7.72 – 7.64 (m, 2H), 7.63 – 7.49 (m, 5H), 7.40 – 7.30 (m, 3H), 7.12 (ddd,  $J = 8.3, 6.9, 1.3$  Hz, 1H), 7.03 (tt,  $J = 7.4, 1.2$  Hz, 1H), 6.93 – 6.88 (m, 2H), 6.85 – 6.79 (m, 2H), 6.32 (br. m, 4H), 2.33 (s, 3H), 2.23 (s, 3H), 2.07 (s, 3H) ppm.

**<sup>13</sup>C NMR** (126 MHz, THF, -35 °C)  $\delta$  = 159.1 (1Cq), 154.9 (1Cq), 141.5 (1Cq), 141.0 (1Cq), 140.7 (2Cq), 139.4 (1Cq), 139.1 (1Cq), 137.9 (1Cq), 137.7 (br, 1Cq-B), 135.1 (1Cq), 132.8 (br, 1Cq-B), 132.4 (1Cq), 131.9 (1Cq), 131.4 (1Cq), 130.9 (1Cq), 130.5 (2CH), 130.4 (1CH), 129.7 (1CH), 129.5 (1CH), 128.8 (1CH), 128.5 (1CH), 128.1 (1CH), 128.0 (1CH), 127.9 (1CH), 127.8 (1CH), 127.5 (1Cq), 127.2 (1CH), 126.98 (1CH), 126.96 (1CH), 125.9 (1CH), 124.1 (1CH), 123.7 (1CH), 123.3 (2CH), 120.0 (1CH), 119.3 (1CH), 118.6 (2CH), 118.2 (1CH), 117.9 (1Cq), 23.4 (1CH<sub>3</sub>), 23.2 (1CH<sub>3</sub>), 21.7 (1CH<sub>3</sub>) ppm.

**<sup>11</sup>B NMR** (161 MHz, THF)  $\delta$  = 38.26 ppm.

**IR (ATR)**  $\tilde{\nu}$  = 3372, 3046, 2915, 2853, 1589, 1549, 1485, 1457, 1411, 1333, 1232, 748  $\text{cm}^{-1}$ .

**MS** calcd  $m/z$  for  $\text{C}_{45}\text{H}_{34}\text{BNO}$   $[\text{M}]^+$ : 615.3; found (MALDI): 615.4

$[\alpha]_{25}^D$ : + 713° ( $c = 0.05$  in DCM) for **93% ee**.

### Azabora[5]helicene (+)-1e

The product was obtained following the general procedure from **5e** (13.5 mg, 25  $\mu\text{mol}$ ). NMR analysis of the crude mixture showed a regioselectivity of 90:10 (**1e**: **S10e**). The product was

isolated as a white solid (10.8 mg, 20  $\mu$ mol, 80%) with **91% ee** after purification by HPLC (acetonitrile:H<sub>2</sub>O 95:5 $\rightarrow$ 100:0 over 5 min, flow rate 1.0 mL/min at 295 K).

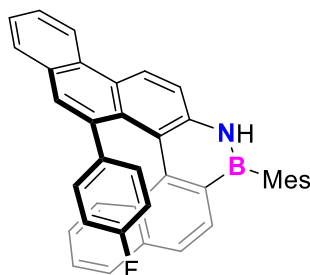

**<sup>1</sup>H NMR** (600 MHz, CD<sub>2</sub>Cl<sub>2</sub>, -35 °C)  $\delta$  = 8.87 (d,  $J$  = 8.7 Hz, 1H), 8.77 (d,  $J$  = 8.3 Hz, 1H), 8.14 (s, 1H), 7.94 (d,  $J$  = 7.7 Hz, 1H), 7.77 – 7.70 (m, 2H), 7.65 – 7.58 (m, 2H), 7.50 – 7.45 (m, 2H), 7.43 – 7.35 (m, 3H), 7.09 (t,  $J$  = 7.2 Hz, 1H), 6.97 (s, 1H), 6.93 (s, 1H), 6.55 – 6.50 (m, 1H), 6.39 (td,  $J$  = 8.8, 2.8 Hz, 1H), 6.01 (td,  $J$  = 8.6, 2.9 Hz, 1H), 5.95 – 5.90 (m, 1H), 2.34 (s, 3H), 2.26 (s, 3H), 2.03 (s, 3H) ppm.

**<sup>1</sup>H NMR** (300 MHz, CD<sub>2</sub>Cl<sub>2</sub>)  $\delta$  = 8.89 (d,  $J$  = 8.9 Hz, 1H), 8.79 (d,  $J$  = 8.2 Hz, 1H), 8.07 (s, 1H), 7.95 (d,  $J$  = 7.5 Hz, 1H), 7.78 – 7.70 (m, 2H), 7.67 – 7.60 (m, 2H), 7.55 – 7.48 (m, 2H), 7.46 – 7.35 (m, 3H), 7.12 (ddd,  $J$  = 8.2, 6.8, 1.3 Hz, 1H), 6.99 (s, 1H), 6.95 (s, 1H), 6.31 (br. m, 4H), 2.38 (s, 3H), 2.30 (s, 3H), 2.07 (s, 3H) ppm.

**<sup>13</sup>C NMR** (151 MHz, CD<sub>2</sub>Cl<sub>2</sub>, -35 °C)  $\delta$  = 160.1 (d,  $^1J_{C-F}$  = 243.5 Hz, 1Cq), 140.4 (1Cq), 140.1 (1Cq), 139.2 (1Cq), 139.1 (1Cq), 137.9 (d,  $^4J_{Cq-F}$  = 2.9 Hz, 1Cq), 137.7 (1Cq), 137.5 (1Cq), 135.7 (br, 1Cq-B), 133.8 (1Cq), 131.3 (br, 1Cq-B), 131.0 (1Cq), 130.3 (1Cq), 129.9 (1Cq), 129.73 (1Cq), 129.71 (1CH), 129.3 (1CH), 128.42 (1CH), 128.39 (d,  $^3J_{C-F}$  = 9.5 Hz, 1CH), 127.7 (1CH), 127.5 (d,  $^3J_{C-F}$  = 7.9 Hz, 1CH), 127.1 (1CH), 127.0 (1CH), 126.9 (1CH), 126.6 (1CH), 126.4 (1Cq), 126.22 (1CH), 126.15 (1CH), 125.9 (1CH), 125.2 (1CH), 123.0 (1CH), 122.5 (1CH), 118.8 (1CH), 116.7 (1Cq), 113.5 (d,  $^2J_{C-F}$  = 21.1 Hz, 1CH), 112.3 (d,  $^2J_{C-F}$  = 21.4 Hz, 1CH), 22.7 (1CH<sub>3</sub>), 22.6 (1CH<sub>3</sub>), 21.1 (1CH<sub>3</sub>) ppm.

**<sup>11</sup>B NMR** (161 MHz, CD<sub>2</sub>Cl<sub>2</sub>)  $\delta$  = 39.54 ppm.

**<sup>19</sup>F NMR** (282 MHz, CD<sub>2</sub>Cl<sub>2</sub>)  $\delta$  = -118.83 ppm.

**IR (ATR)**  $\tilde{\nu}$  = 3375, 3040, 2918, 2856, 1605, 1548, 1506, 1492, 1456, 1411, 1332, 1228, 1157, 1044, 820, 749 cm<sup>-1</sup>.

**HRMS** calcd  $m/z$  for C<sub>39</sub>H<sub>30</sub>BFN [M+H]<sup>+</sup>: 542.2456; found (ESI): 542.2441

**$[\alpha]_{25}^D$** : + 583° (c = 0.03 in DCM) for **91% ee**.

### Azabora[5]helicene (+)-**1f**

The product was obtained following the general procedure from **5f** (14.9 mg, 25  $\mu$ mol). NMR analysis of the crude mixture showed a regioselectivity of 94:6 (**1f**: **S10f**). The product was isolated as a white solid (11.4 mg, 19  $\mu$ mol, 77%) with **99% ee** after purification by HPLC (acetonitrile:THF 95:5 $\rightarrow$ 85:15 over 20 min, flow rate 1.0 mL/min at 295 K).

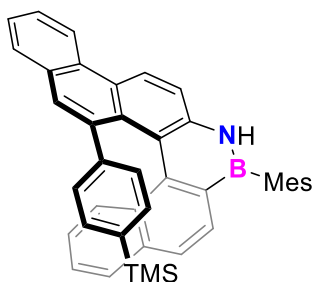

**<sup>1</sup>H NMR** (500 MHz, CD<sub>2</sub>Cl<sub>2</sub>, -35 °C)  $\delta$  = 8.88 (d,  $J$  = 9.0 Hz, 1H), 8.78 (d,  $J$  = 8.2 Hz, 1H), 8.13 (s, 1H), 7.94 (d,  $J$  = 7.7 Hz, 1H), 7.75 (d,  $J$  = 8.7 Hz, 1H), 7.72 (ddd,  $J$  = 8.3, 7.1, 1.4 Hz, 1H), 7.62 (ddd,  $J$  = 7.9, 7.2, 1.0 Hz, 1H), 7.53 (s, 1H), 7.48 (d,  $J$  = 7.9 Hz, 1H), 7.45 (d,  $J$  = 8.5 Hz, 1H), 7.36 – 7.31 (m, 2H), 7.25 (d,  $J$  = 8.1 Hz, 1H), 7.06 (ddd,  $J$  = 8.3, 6.7, 1.2 Hz, 1H), 6.98 (s, 1H), 6.92 (s, 1H), 6.81 (dd,  $J$  = 7.6, 0.8 Hz, 1H), 6.51 (dd,  $J$  = 7.6, 1.7 Hz, 1H), 6.39 (dd,  $J$  = 7.6, 1.0 Hz, 1H), 5.89 (dd,  $J$  = 7.6, 1.7 Hz, 1H), 2.34 (s, 3H), 2.28 (s, 3H), 2.04 (s, 3H), 0.12 (s, 9H) ppm.

**<sup>1</sup>H NMR** (300 MHz, CD<sub>2</sub>Cl<sub>2</sub>)  $\delta$  = 8.89 (d,  $J$  = 8.5 Hz, 1H), 8.79 (d,  $J$  = 8.2 Hz, 1H), 8.05 (s, 1H), 7.95 (d,  $J$  = 8.3 Hz, 1H), 7.79 – 7.69 (m, 2H), 7.62 (t,  $J$  = 7.4 Hz, 1H), 7.57 – 7.47 (m, 3H), 7.42 – 7.33 (m, 2H), 7.28 (d,  $J$  = 8.3 Hz, 1H), 7.09 (t,  $J$  = 7.7 Hz, 1H), 7.00 (s, 1H), 6.94 (s, 1H), 6.43 (br. m, 4H), 2.37 (s, 3H), 2.32 (s, 3H), 2.07 (s, 3H), 0.15 (s, 9H) ppm.

**<sup>13</sup>C NMR** (126 MHz, CD<sub>2</sub>Cl<sub>2</sub>, -35 °C)  $\delta$  = 141.8 (1Cq), 140.6 (1Cq), 140.1 (1Cq), 139.3 (1Cq), 139.1 (1Cq), 138.6 (1Cq), 137.6 (1Cq), 136.0 (1Cq), 135.9 (br, 1Cq-B), 133.8 (1Cq), 131.7 (1CH), 131.1 (br, 1Cq-B), 131.0 (1Cq), 130.5 (1CH), 130.2 (1Cq), 129.9 (1Cq), 129.8 (1Cq), 129.6 (1CH), 128.8 (1CH), 128.4 (1CH), 127.7 (1CH), 127.1 (1CH), 127.0 (1CH), 126.8 (1CH), 126.6 (1CH), 126.31 (1Cq), 126.30 (1CH), 126.26 (1CH), 126.1 (1CH), 126.0 (1CH), 125.1 (1CH), 124.9 (1CH), 122.9 (1CH), 122.5 (1CH), 118.7 (1CH), 116.9 (1Cq), 22.7 (1CH<sub>3</sub>), 22.6 (1CH<sub>3</sub>), 21.1 (1CH<sub>3</sub>), -1.6 (3CH<sub>3</sub>) ppm.

**<sup>11</sup>B NMR** (161 MHz, CD<sub>2</sub>Cl<sub>2</sub>)  $\delta$  = 38.79 ppm.

**IR (ATR)**  $\tilde{\nu}$  = 3368, 2952, 1550, 1489, 1457, 1412, 1331, 1246, 1111, 1042, 839, 818, 749 cm<sup>-1</sup>.

**HRMS** calcd  $m/z$  for C<sub>42</sub>H<sub>38</sub>BNNaSi [M+Na]<sup>+</sup>: 618.2766; found (ESI): 618.2752

**$[\alpha]_{25}^D$** : + 385° (c = 0.03 in DCM) for **99% ee**.

### Azabora[5]helicene (+)-1g

The product was obtained following the general procedure from **5g** (13.9 mg, 25  $\mu$ mol) at 0 °C. NMR analysis of the crude mixture showed a regioselectivity of 90:10 (**1g**: **S10g**). The product was isolated as a white solid (11.1 mg, 20  $\mu$ mol, 80%) with **88% ee** after purification by HPLC (acetonitrile:H<sub>2</sub>O 90:10→100:0 over 10 min, flow rate 1.0 mL/min at 295 K).

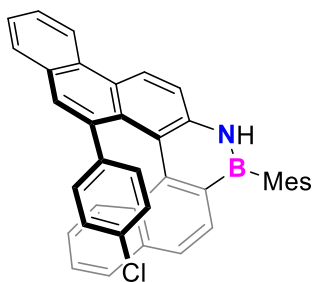

**<sup>1</sup>H NMR** (500 MHz, CD<sub>2</sub>Cl<sub>2</sub>, -35 °C)  $\delta$  = 8.88 (d,  $J$  = 9.1 Hz, 1H), 8.78 (d,  $J$  = 8.1 Hz, 1H), 8.15 (s, 1H), 7.94 (d,  $J$  = 7.3 Hz, 1H), 7.77 – 7.71 (m, 2H), 7.65 – 7.59 (m, 2H), 7.50 (s, 1H), 7.45 (d,  $J$  = 8.5 Hz, 1H), 7.44 – 7.35 (m, 3H), 7.09 (ddd,  $J$  = 8.2, 6.9, 1.1 Hz, 1H), 6.97 (s, 1H), 6.92 (s, 1H), 6.64 (dd,  $J$  = 8.3, 2.3 Hz, 1H), 6.49 (dd,  $J$  = 8.3, 2.4 Hz, 1H), 6.24 (dd,  $J$  = 8.3, 2.3 Hz, 1H), 5.88 (dd,  $J$  = 8.3, 2.2 Hz, 1H), 2.34 (s, 3H), 2.26 (s, 3H), 2.03 (s, 3H) ppm.

**<sup>1</sup>H NMR** (300 MHz, CD<sub>2</sub>Cl<sub>2</sub>)  $\delta$  = 8.89 (d,  $J$  = 9.0 Hz, 1H), 8.79 (d,  $J$  = 8.3 Hz, 1H), 8.08 (s, 1H), 7.95 (d,  $J$  = 7.8 Hz, 1H), 7.80 – 7.70 (m, 2H), 7.67 – 7.60 (m, 2H), 7.54 – 7.48 (m, 2H),

7.45 (s, 2H), 7.39 (ddd,  $J = 8.0, 6.9, 1.1$  Hz, 1H), 7.11 (ddd,  $J = 8.2, 6.8, 1.2$  Hz, 1H), 6.99 (s, 1H), 6.95 (s, 1H), 6.34 (br. m, 4H), 2.38 (s, 3H), 2.30 (s, 3H), 2.06 (s, 3H) ppm.

$^{13}\text{C}$  NMR (126 MHz,  $\text{CD}_2\text{Cl}_2$ ,  $-35$  °C)  $\delta = 140.4$  (1Cq), 140.2 (1Cq), 140.0 (1Cq), 139.2 (1Cq), 139.1 (1Cq), 137.7 (1Cq), 137.3 (1Cq), 135.7 (br, 1Cq-B), 133.8 (1Cq), 131.3 (br, 1Cq-B), 130.9 (1Cq), 130.3 (1Cq), 130.2 (1Cq), 130.0 (1Cq), 129.7 (1CH), 129.4 (1Cq), 129.3 (1CH), 128.5 (1CH), 128.0 (1CH), 127.7 (1CH), 127.2 (1CH), 127.1 (1CH), 127.0 (1CH), 126.9 (1CH), 126.8 (1CH), 126.6 (1CH), 126.4 (1Cq), 126.23 (1CH), 126.17 (1CH), 125.8 (1CH), 125.5 (1CH), 125.2 (1CH), 123.0 (1CH), 122.5 (1CH), 118.9 (1CH), 116.6 (1Cq), 22.6 (2 $\text{CH}_3$ ), 21.1 (1 $\text{CH}_3$ ) ppm.

$^{11}\text{B}$  NMR (161 MHz,  $\text{CD}_2\text{Cl}_2$ )  $\delta = 38.96$  ppm.

IR (ATR)  $\tilde{\nu} = 3370, 2910, 1610, 1548, 1487, 1453, 1408, 1328, 1277, 1090, 977, 818, 748$   $\text{cm}^{-1}$ .

HRMS calcd  $m/z$  for  $\text{C}_{39}\text{H}_{29}\text{BCINNa}$  [ $\text{M}+\text{Na}$ ] $^+$ : 580.1980; found (ESI): 580.1980

$[\alpha]_{25}^D$ : + 543° ( $c = 0.06$  in DCM) for 88% *ee*.

### Azabora[5]helicene (+)-1h

The product was obtained following the general procedure from **5h** (14.8 mg, 25  $\mu\text{mol}$ ). NMR analysis of the crude mixture showed a regioselectivity of 96:4 (**1h**: **S10h**). The product was isolated as a white solid (11.8 mg, 20  $\mu\text{mol}$ , 80%) with 86% *ee* after purification by HPLC (acetonitrile: $\text{H}_2\text{O}$  95:5 $\rightarrow$ 100:0 over 5 min, flow rate 1.0 mL/min at 295 K).

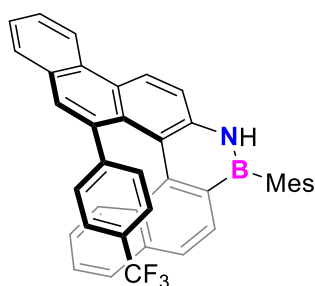

$^1\text{H}$  NMR (500 MHz,  $\text{CD}_2\text{Cl}_2$ ,  $-35$  °C)  $\delta = 8.90$  (d,  $J = 9.2$  Hz, 1H), 8.79 (d,  $J = 8.2$  Hz, 1H), 8.17 (s, 1H), 7.96 (d,  $J = 7.9$  Hz, 1H), 7.78 (d,  $J = 8.7$  Hz, 1H), 7.75 (ddd,  $J = 8.4, 7.1, 1.4$  Hz, 1H), 7.64 (ddd,  $J = 7.9, 7.0, 0.9$  Hz, 1H), 7.56 (s, 1H), 7.53 (d,  $J = 7.8$  Hz, 1H), 7.44 (d,  $J = 8.5$  Hz, 1H), 7.38 – 7.34 (m, 2H), 7.31 (d,  $J = 8.1$  Hz, 1H), 7.10 (ddd,  $J = 8.2, 6.8, 1.2$  Hz, 1H), 6.97 (s, 1H), 6.95 – 6.91 (m, 2H), 6.68 (d,  $J = 8.0$  Hz, 1H), 6.49 (dd,  $J = 8.1, 1.3$  Hz, 1H), 6.04 (d,  $J = 8.2$  Hz, 1H), 2.34 (s, 3H), 2.27 (s, 3H), 2.02 (s, 3H) ppm.

$^1\text{H}$  NMR (300 MHz,  $\text{CD}_2\text{Cl}_2$ )  $\delta = 8.91$  (d,  $J = 9.0$  Hz, 1H), 8.81 (d,  $J = 8.2$  Hz, 1H), 8.10 (s, 1H), 7.97 (d,  $J = 7.5$  Hz, 1H), 7.81 – 7.73 (m, 2H), 7.68 – 7.62 (m, 1H), 7.60 – 7.54 (m, 2H), 7.50 (d,  $J = 8.4$  Hz, 1H), 7.45 – 7.32 (m, 3H), 7.13 (ddd,  $J = 8.4, 7.0, 1.2$  Hz, 1H), 7.05 – 6.88 (m, 3H), 6.63 (br. m,  $J = 51.3$  Hz, 2H), 6.09 (br. s, 1H), 2.37 (s, 3H), 2.31 (s, 3H), 2.05 (s, 3H) ppm.

$^{13}\text{C}$  NMR (126 MHz,  $\text{CD}_2\text{Cl}_2$ ,  $-35$  °C)  $\delta = 145.2 - 145.1$  (m, 1Cq), 140.4 (1Cq), 140.1 (1Cq), 139.2 (1Cq), 139.0 (1Cq), 137.7 (1Cq), 137.0 (1Cq), 135.6 (br, 1Cq-B), 133.8 (1Cq), 131.3 (br, 1Cq-B), 130.8 (1Cq), 130.3 (1CH), 130.2 (1Cq), 130.0 (1Cq), 129.15 (1CH), 129.13 (1Cq), 128.6 (1CH), 127.8 (1CH), 127.3 (1CH), 127.1 (1CH), 126.9 (1CH), 126.71 (1CH), 126.66 (1CH), 126.4 (1Cq), 126.25 (1CH), 126.21 (1CH), 126.1 (1CH), 125.95 (1CH), 125.91 (q,  $^2J_{\text{C-F}} = 31.7$  Hz, 1Cq), 125.3 (1CH), 123.5 (q,  $^3J_{\text{C-F}} = 3.6$  Hz, 1CH), 123.14 (1CH), 123.11 (1Cq),

122.6 (1CH), 122.1 (q,  $^3J_{C-F} = 3.3$  Hz, 1CH), 118.9 (1CH), 116.4 (1Cq), 22.7 (1CH<sub>3</sub>), 22.6 (1CH<sub>3</sub>), 21.1 (1CH<sub>3</sub>) ppm.

$^{11}\text{B}$  NMR (161 MHz, CD<sub>2</sub>Cl<sub>2</sub>)  $\delta = 40.39$  ppm.

$^{19}\text{F}$  NMR (377 MHz, CDCl<sub>3</sub>)  $\delta = -62.79$  ppm.

IR (ATR)  $\tilde{\nu} = 3372, 3045, 2916, 2856, 1611, 1550, 1489, 1458, 1414, 1323, 1165, 1121, 1110, 1066, 836, 749$  cm<sup>-1</sup>.

HRMS calcd  $m/z$  for C<sub>40</sub>H<sub>29</sub>BF<sub>3</sub>NNa [M+Na]<sup>+</sup>: 614.2244; found (ESI): 614.2280

$[\alpha]_{25}^D : + 489^\circ$  (c = 0.02 in DCM) for **86%** *ee*.

### Azabora[5]helicene (+)-**1i**

The product was obtained following the general procedure from **5i** (13.8 mg, 25  $\mu$ mol) at 0 °C. NMR analysis of the crude mixture showed a regioselectivity of 65:35 (**1i**: **S10i**). The product was isolated as a white solid (7.0 mg, 12  $\mu$ mol, 50%) with **91%** *ee* after purification by HPLC (acetonitrile:H<sub>2</sub>O 95:5→100:0 over 5 min, flow rate 1.0 mL/min at 295 K).

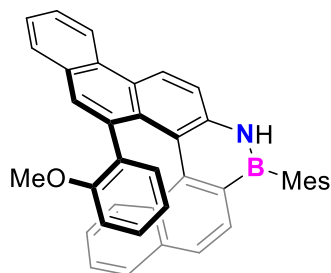

At room temperature two diastereoisomers are observed (dr=80:20, determined by  $^1\text{H}$  NMR)

$^1\text{H}$  NMR (400 MHz, C<sub>2</sub>D<sub>2</sub>Cl<sub>4</sub>, 140 °C, signals coalesce to a single species)  $\delta = 8.85$  (d,  $J = 8.9$  Hz, 1H), 8.80 (d,  $J = 7.9$  Hz, 1H), 7.96 (dd,  $J = 7.8, 1.5$  Hz, 1H), 7.86 (br.s, 1H), 7.78 – 7.46 (m, 7H), 7.42 – 7.37 (m, 2H), 7.16 (ddd,  $J = 8.5, 6.8, 1.4$  Hz, 1H), 7.02 (s, 1H), 6.95 (s, 1H), 6.70 (t,  $J = 7.6$  Hz, 1H), 6.54 – 6.03 (m, 3H), 3.60 – 2.77 (m, 3H), 2.45 – 2.41 (m, 6H), 2.01 (br.s, 3H) ppm.

$^{13}\text{C}$  NMR (101 MHz, CDCl<sub>3</sub>, 25 °C) of the major diastereoisomer:  $\delta = 153.87$  (1Cq), 141.06 (1Cq), 140.15 (1Cq), 139.26 (1Cq), 138.78 (1Cq), 137.78 (1Cq), 136.67 (1Cq), 133.94 (1Cq), 132.30 (1Cq), 131.96 (1Cq), 131.78 (1Cq), 131.47 (1Cq), 131.07 (1CH), 130.65 (1Cq), 129.41 (1CH), 128.78 (1CH), 128.61 (1CH), 128.00 (1CH), 127.51 (1CH), 127.16 (1CH), 127.01 (1CH), 126.84 (1CH), 126.71 (1CH), 126.04 (1CH), 125.91 (1CH), 125.85 (1CH), 125.82 (1Cq), 125.16 (1CH), 122.90 (1CH), 122.76 (1CH), 120.12 (1CH), 118.73 (1Cq), 118.54 (1CH), 109.48 (1CH), 54.42 (1CH<sub>3</sub>), 23.48 (1CH<sub>3</sub>), 22.97 (1CH<sub>3</sub>), 21.40 (1CH<sub>3</sub>) ppm. The carbon atoms bonded to boron are not observed.

$^{11}\text{B}$  NMR (128 MHz, CDCl<sub>3</sub>, 25 °C)  $\delta = 39.87$  ppm.

IR (ATR)  $\tilde{\nu} = 3368, 3044, 2916, 1549, 1489, 1459, 1412, 1331, 1245, 1166, 1116, 1031, 948, 886, 849, 748$  cm<sup>-1</sup>.

HRMS calcd  $m/z$  for C<sub>40</sub>H<sub>32</sub>BNNaO [M+Na]<sup>+</sup>: 576.2476; found (ESI): 576.2481

$[\alpha]_{25}^D : + 495^\circ$  (c = 0.06 in DCM) for **91%** *ee*.

### Azabora[5]helicene (+)-**1j**:

The product was obtained following the general procedure from **5j** (13.8 mg, 25  $\mu$ mol). NMR analysis of the crude mixture showed a regioselectivity of 85:15 (**1j**:**S10j**). The product was isolated as a white solid (11.0 mg, 20  $\mu$ mol, 80%) with **90% ee** after purification by HPLC (acetonitrile:H<sub>2</sub>O 95:5 $\rightarrow$ 100:0 over 5 min, flow rate 1.0 mL/min at 295 K).

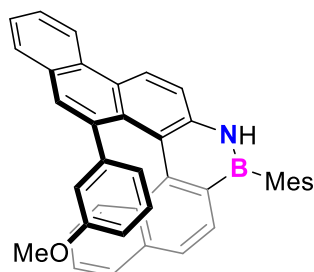

**<sup>1</sup>H NMR** (600 MHz, CDCl<sub>3</sub>, 60 °C)  $\delta$  = 8.86 (d,  $J$  = 8.9 Hz, 1H), 8.77 (d,  $J$  = 8.3 Hz, 1H), 7.94 (d,  $J$  = 7.8 Hz, 1H), 7.86 (br. s, 1H), 7.71 (ddd,  $J$  = 8.4, 7.0, 1.4 Hz, 1H), 7.67 (d,  $J$  = 8.5 Hz, 1H), 7.63 – 7.57 (m, 3H), 7.55 (s, 1H), 7.48 (d,  $J$  = 8.1 Hz, 1H), 7.40 – 7.36 (m, 2H), 7.11 (t,  $J$  = 7.6 Hz, 1H), 7.00 (s, 1H), 6.94 (s, 1H), 6.23 (dd,  $J$  = 7.9, 2.0 Hz, 1H), 6.70 – 5.49 (m, 3H), 3.52 (br. s, 3H), 2.40 (s, 3H), 2.35 (s, 3H), 2.05 (s, 3H) ppm.

**<sup>13</sup>C NMR** (126 MHz, CDCl<sub>3</sub>, 60 °C)  $\delta$  = 143.6 (1Cq), 140.7 (1Cq), 140.5 (1Cq), 140.2 (1Cq), 139.3 (1Cq), 137.9 (1Cq), 134.6 (1Cq), 131.6 (1Cq), 131.0 (1Cq), 130.6 (1Cq), 130.1 (1CH), 129.6 (1CH), 128.8 (1CH), 127.9 (1CH), 127.6 (1CH), 127.5 (1CH), 127.4 (1CH), 127.1 (1Cq), 127.0 (1CH), 126.3 (1CH), 126.23 (1CH), 126.20 (1CH), 124.9 (1CH), 123.2 (1CH), 122.7 (1CH), 118.7 (1CH), 117.8 (1Cq), 55.1 (1CH<sub>3</sub>), 23.0 (1CH<sub>3</sub>), 22.8 (1CH<sub>3</sub>), 21.4 (1CH<sub>3</sub>) ppm. The carbon atoms bonded to boron are not observed. and 4CH and 1Cq are suppressed due to rotation.

**<sup>11</sup>B NMR** (161 MHz, CD<sub>2</sub>Cl<sub>2</sub>)  $\delta$  = 39.72 ppm.

**IR (ATR)**  $\tilde{\nu}$  = 3377, 2909, 1606, 1575, 1549, 1484, 1457, 1411, 1331, 1278, 1042, 747 cm<sup>-1</sup>.

**HRMS** calcd  $m/z$  for C<sub>40</sub>H<sub>32</sub>BNNaO [M+Na]<sup>+</sup>: 576.2476; found (ESI) 576.2471

**$[\alpha]_{25}^D$** : + 453° (c = 0.07 in DCM) for **90% ee**.

### Azabora[5]helicene (+)-**1b(BPh)**

The product was obtained following the general procedure from precursor **S5b(BPh)** (12.4 mg, 25  $\mu$ mol). NMR analysis of the crude mixture showed a regioselectivity of 87:13 (**1b(BPh)**:**S10b(BPh)**). The product was isolated as a white solid (10.0 mg, 20  $\mu$ mol, 81%) with **98% ee** after purification by HPLC (acetonitrile:H<sub>2</sub>O 95:5 $\rightarrow$ 100:0 over 5 min, flow rate 1.0 mL/min at 295 K).

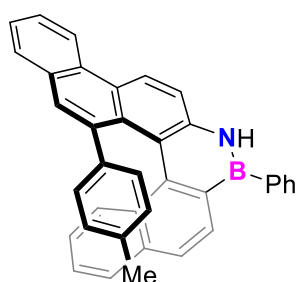

**<sup>1</sup>H NMR** (600 MHz, CD<sub>2</sub>Cl<sub>2</sub>, -50 °C)  $\delta$  = 8.90 (d,  $J$  = 8.5 Hz, 1H), 8.77 (d,  $J$  = 8.7 Hz, 1H), 8.21 (s, 1H), 7.96 – 7.90 (m, 4H), 7.81 (d,  $J$  = 8.6 Hz, 1H), 7.70 (t,  $J$  = 7.6 Hz, 1H), 7.61 (t,  $J$  = 7.4 Hz, 1H), 7.58 – 7.49 (m, 5H), 7.45 – 7.41 (m, 2H), 7.35 (t,  $J$  = 7.3 Hz, 1H), 7.05 (t,  $J$  = 7.6 Hz, 1H), 6.48 (d,  $J$  = 7.7 Hz, 1H), 6.39 (dd,  $J$  = 7.7, 1.7 Hz, 1H), 6.11 (d,  $J$  = 7.7 Hz, 1H), 5.82 (dd,  $J$  = 7.8, 1.8 Hz, 1H), 2.03 (s, 3H) ppm.

**<sup>1</sup>H NMR** (300 MHz, CD<sub>2</sub>Cl<sub>2</sub>)  $\delta$  = 8.91 (d,  $J$  = 9.0 Hz, 1H), 8.78 (d,  $J$  = 8.0 Hz, 1H), 8.14 (s, 1H), 7.99 – 7.88 (m, 4H), 7.80 (d,  $J$  = 8.7 Hz, 1H), 7.72 (ddd,  $J$  = 8.4, 7.0, 1.5 Hz, 1H), 7.65 –

7.43 (m, 8H), 7.37 (ddd,  $J = 8.2, 6.9, 1.3$  Hz, 1H), 7.08 (ddd,  $J = 8.3, 6.8, 1.5$  Hz, 1H), 6.34 (br. m, 4H), 2.06 (s, 3H) ppm.

$^{13}\text{C}$  NMR (126 MHz,  $\text{CD}_2\text{Cl}_2$ ,  $-35$  °C)  $\delta = 140.4$  (1Cq), 139.0 (1Cq), 138.75 (1Cq), 138.74 (1Cq), 134.3 (1Cq), 133.7 (2CH), 133.4 (1Cq), 131.1 (1Cq), 130.5 (1Cq), 130.0 (1Cq), 129.8 (1Cq), 129.7 (1CH), 129.2 (1CH), 128.9 (1CH), 128.3 (1CH), 128.1 (2CH), 127.54 (1CH), 127.45 (1CH), 126.7 (1CH), 126.61 (1CH), 126.55 (1CH), 126.5 (1Cq), 126.4 (1CH), 126.08 (1CH), 126.06 (1CH), 125.7 (1CH), 125.6 (1CH), 124.9 (1CH), 123.2 (1CH), 122.5 (1CH), 118.6 (1CH), 116.8 (1Cq), 20.5 (1CH<sub>3</sub>) ppm. The carbon atoms bonded to boron are not observed.

$^{11}\text{B}$  NMR (161 MHz,  $\text{CD}_2\text{Cl}_2$ )  $\delta = 37.31$  ppm.

IR (ATR)  $\tilde{\nu} = 3366, 3040, 2918, 2853, 1608, 1549, 1487, 1457, 1411, 1330, 1043, 814$  cm<sup>-1</sup>.

HRMS calcd  $m/z$  for  $\text{C}_{37}\text{H}_{26}\text{BNNa}$  [ $\text{M}+\text{Na}$ ]<sup>+</sup>: 518.2057; found (ESI): 518.2066

$[\alpha]_{25}^{\text{D}}$ : +531° ( $c = 0.02$  in DCM) for **98%** *ee*.

#### Azabora[5]helicene (+)-**1b**(NMe)

The product was obtained following the general procedure from **S5b**(NMe) (13.8 mg, 25 μmol). NMR analysis of the crude mixture showed a regioselectivity of 43:57 (**1b**(NMe): **S10b**(NMe)). The product was isolated as a white solid (5.2 mg, 9 μmol, 38%) with **97%** *ee* after purification by HPLC (acetonitrile:H<sub>2</sub>O 95:5→100:0 over 5 min, flow rate 1.0 mL/min at 295 K).

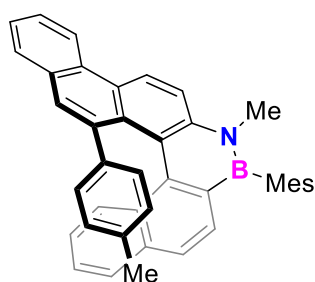

$^1\text{H}$  NMR (500 MHz,  $\text{CD}_2\text{Cl}_2$ ,  $-35$  °C)  $\delta = 8.98$  (d,  $J = 9.5$  Hz, 1H), 8.82 (d,  $J = 8.1$  Hz, 1H), 8.13 (d,  $J = 9.1$  Hz, 1H), 7.93 (d,  $J = 7.7$  Hz, 1H), 7.72 (ddd,  $J = 8.3, 7.0, 1.4$  Hz, 1H), 7.62 (ddd,  $J = 7.9, 7.1, 1.0$  Hz, 1H), 7.53 (d,  $J = 7.9$  Hz, 1H), 7.46 (s, 1H), 7.36 – 7.31 (m, 2H), 7.27 (d,  $J = 8.0$  Hz, 1H), 7.14 (d,  $J = 8.1$  Hz, 1H), 7.05 (ddd,  $J = 8.4, 6.8, 1.3$  Hz, 1H), 6.98 (s, 1H), 6.95 (s, 1H), 6.45 (d,  $J = 8.0$  Hz, 1H), 6.34 (dd,  $J = 7.8, 1.9$  Hz, 1H), 6.08 (d,  $J = 8.0$  Hz, 1H), 5.76 (dd,  $J = 7.9, 2.1$  Hz, 1H), 3.69 (s, 3H), 2.37 (s, 3H), 2.16 (s, 3H),

1.98 (s, 3H), 1.95 (s, 3H) ppm.

$^{13}\text{C}$  NMR (126 MHz,  $\text{CD}_2\text{Cl}_2$ ,  $-35$  °C)  $\delta = 141.4$  (1Cq), 139.7 (1Cq), 139.5 (1Cq), 139.1 (1Cq), 138.8 (1Cq), 138.6 (1Cq), 137.3 (br, 1Cq-B), 137.2 (1Cq), 134.4 (1Cq), 133.8 (1Cq), 131.2 (1Cq), 131.0 (br, 1Cq-B), 130.2 (1Cq), 129.8 (1Cq), 129.6 (1Cq), 129.4 (1CH), 129.1 (1CH), 128.3 (1CH), 127.6 (1CH), 127.4 (1CH), 127.01 (1CH), 126.95 (1CH), 126.9 (1CH), 126.7 (1CH), 126.6 (1CH), 126.4 (1CH), 126.1 (1CH), 125.82 (1CH), 125.78 (1CH), 125.7 (1Cq), 125.5 (1CH), 125.0 (1CH), 122.51 (1CH), 122.50 (1CH), 118.5 (1Cq), 114.9 (1CH), 36.4 (1CH<sub>3</sub>), 22.3 (1CH<sub>3</sub>), 22.2 (1CH<sub>3</sub>), 21.2 (1CH<sub>3</sub>), 20.4 (1CH<sub>3</sub>) ppm.

$^{11}\text{B}$  NMR (161 MHz,  $\text{CD}_2\text{Cl}_2$ )  $\delta = 40.39$  ppm.

IR (ATR)  $\tilde{\nu} = 2915, 2853, 1541, 1477, 1456, 1394, 1325, 1233, 1040, 811, 746$  cm<sup>-1</sup>.

**HRMS** calcd  $m/z$  for  $C_{41}H_{34}BN$   $[M]^+$ : 551.2786; found (ESI): 551.2758

$[\alpha]_{25}^D$ : + 442° (c = 0.03 in DCM) for **97%** *ee*.

### Azabora[5]helicene (+)-**2b**

The product was obtained following the general procedure from **7b** (10.5 mg, 25  $\mu$ mol). NMR analysis of the crude mixture showed a regioselectivity of 42:58 (**2b**:**11b**). The product was isolated as a white solid (4.2 mg, 10  $\mu$ mol, 40%) with **99%** *ee* after purification by HPLC (acetonitrile:H<sub>2</sub>O 95:5→100:0 over 5 min, flow rate 1.0 mL/min at 295 K).

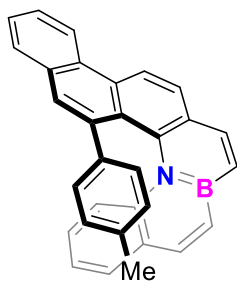

**<sup>1</sup>H NMR** (500 MHz, CD<sub>2</sub>Cl<sub>2</sub>, -35 °C)  $\delta$  = 8.83 (d,  $J$  = 8.2 Hz, 1H), 8.79 (d,  $J$  = 8.5 Hz, 1H), 8.22 (d,  $J$  = 11.0 Hz, 1H), 8.10 (d,  $J$  = 8.4 Hz, 1H), 7.91 (d,  $J$  = 7.7 Hz, 1H), 7.72 (t,  $J$  = 7.4 Hz, 1H), 7.65 (t,  $J$  = 7.3 Hz, 1H), 7.56 (d,  $J$  = 11.1 Hz, 1H), 7.43 (s, 1H), 7.36 (d,  $J$  = 11.0 Hz, 1H), 7.28 (d,  $J$  = 7.5 Hz, 1H), 7.07 (t,  $J$  = 7.2 Hz, 1H), 7.01 (d,  $J$  = 11.3 Hz, 1H), 6.88 (t,  $J$  = 7.7 Hz, 1H), 6.83 (d,  $J$  = 8.3 Hz, 1H), 6.68 (d,  $J$  = 7.8 Hz, 1H), 6.42 (dd,  $J$  = 7.6, 1.7 Hz, 1H), 6.33 (d,  $J$  = 7.7 Hz, 1H), 5.65 (dd,  $J$  = 7.7, 1.5 Hz, 1H), 2.16 (s, 3H) ppm.

**<sup>1</sup>H NMR** (300 MHz, CD<sub>2</sub>Cl<sub>2</sub>)  $\delta$  = 8.89 – 8.76 (m, 2H), 8.23 (d,  $J$  = 11.4 Hz, 1H), 8.10 (d,  $J$  = 8.5 Hz, 1H), 7.93 (d,  $J$  = 7.3 Hz, 1H), 7.78 – 7.62 (m, 2H), 7.58 (d,  $J$  = 11.1 Hz, 1H), 7.44 (s, 1H), 7.37 (d,  $J$  = 10.9 Hz, 1H), 7.30 (d,  $J$  = 7.8 Hz, 1H), 7.13 – 6.99 (m, 2H), 6.96 – 6.84 (m, 2H), 6.57 (br. m, 3H), 5.73 (br. s, 1H), 2.19 (s, 3H) ppm.

**<sup>13</sup>C NMR** (126 MHz, CD<sub>2</sub>Cl<sub>2</sub>, -35 °C)  $\delta$  = 143.1 (1CH), 142.7 (1CH), 139.1 (1Cq), 137.0 (1Cq), 136.9 (1Cq), 135.3 (1Cq), 134.8 (1Cq), 131.7 (1Cq), 130.6 (1Cq), 129.6 (1Cq), 129.3 (1CH), 128.9 (1CH), 128.4 (1CH), 128.3 (1Cq), 127.9 (1CH), 127.6 (1CH), 127.5 (1Cq), 127.4 (1CH), 127.0 (1CH), 126.7 (1CH), 126.6 (1CH), 126.1 (1CH), 124.9 (1CH), 123.3 (1CH), 122.6 (1Cq), 121.9 (1CH), 119.5 (1CH), 118.7 (1CH), 20.7 (1CH<sub>3</sub>) ppm. The carbon atoms bonded to boron are not observed.

**<sup>11</sup>B NMR** (161 MHz, CDCl<sub>3</sub>)  $\delta$  = 30.76 ppm.

**IR (ATR)**  $\tilde{\nu}$  = 3015, 1591, 1431, 1341, 1281, 1213, 827, 816, 798, 753 cm<sup>-1</sup>.

**HRMS** calcd  $m/z$  for  $C_{31}H_{22}BNNa$   $[M+Na]^+$ : 442.1743; found (ESI): 442.1731

$[\alpha]_{25}^D$ : + 311° (c = 0.07 in DCM) for **99%** *ee*.

### Azabora[5]helicene (+)-**2c**

The product was obtained following the general procedure from **7c** (10.9 mg, 25  $\mu$ mol). NMR analysis of the crude mixture showed a regioselectivity of 13:87 (**2c**:**S11c**). The product was isolated as a white solid (1.1 mg, 3  $\mu$ mol, 10%) with **84%** *ee* after purification by HPLC (acetonitrile:H<sub>2</sub>O 90:10→100:0 over 20 min, flow rate 1.0 mL/min at 295 K).

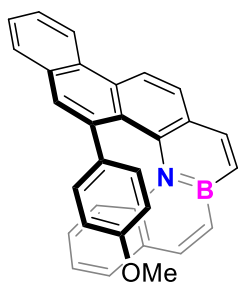

**<sup>1</sup>H NMR** (600 MHz, CDCl<sub>3</sub>, -35 °C)  $\delta$  = 8.84 (d,  $J$  = 7.9 Hz, 1H), 8.78 (d,  $J$  = 8.3 Hz, 1H), 8.21 (d,  $J$  = 10.8 Hz, 1H), 8.11 – 8.07 (m, 1H), 7.91 (d,  $J$  = 7.7 Hz, 1H), 7.74 (t,  $J$  = 7.5 Hz, 1H), 7.67 (t,  $J$  = 7.3 Hz, 1H), 7.61 (d,  $J$  = 11.1 Hz, 1H), 7.42 (s, 1H), 7.37 (d,  $J$  = 10.7 Hz, 1H), 7.32 (d,  $J$  = 7.5 Hz, 1H), 7.08 (t,  $J$  = 7.2 Hz, 1H), 7.04 (d,  $J$  = 11.1 Hz, 1H), 6.91 (t,  $J$  = 7.2 Hz, 1H), 6.87 (d,  $J$  = 8.2 Hz, 1H), 6.50 (d,  $J$  = 8.2 Hz, 1H), 6.44 (d,  $J$  = 8.4 Hz, 1H), 6.14 (d,  $J$  = 8.6 Hz, 1H), 5.77 (d,  $J$  = 8.6 Hz, 1H), 3.72 (s, 3H) ppm.

**<sup>13</sup>C NMR** (151 MHz, CDCl<sub>3</sub>, -35 °C)  $\delta$  = 157.4 (1Cq), 143.1 (1CH), 142.9 (1CH), 139.2 (1Cq), 136.6 (1Cq), 134.8 (1Cq), 132.9 (1Cq), 131.7 (1Cq), 130.7 (1Cq), 129.64 (1Cq), 129.56 (1CH), 129.4 (1CH), 128.9 (1CH), 128.5 (1CH), 128.3 (1Cq), 127.9 (1CH), 127.48 (1Cq), 127.47 (1CH), 127.0 (1CH), 126.7 (1CH), 126.3 (1CH), 126.2 (1CH), 123.4 (1CH), 122.8 (1Cq), 122.0 (1CH), 119.6 (1CH), 118.8 (1CH), 112.9 (1CH), 112.1 (1CH), 55.5 (1CH<sub>3</sub>) ppm. The carbon atoms bonded to boron are not observed.

**<sup>11</sup>B NMR** (128 MHz, CDCl<sub>3</sub>)  $\delta$  = 31.17 ppm.

**HRMS** calcd  $m/z$  for C<sub>31</sub>H<sub>23</sub>BNO [M+H]<sup>+</sup>: 436.1868; found (APCI): 436.1868

#### Azabora[5]helicene (+)-2e

The product was obtained following the general procedure from **7e** (10.6 mg, 25  $\mu$ mol). NMR analysis of the crude mixture showed a regioselectivity of 57:43 (**2e**: **S11e**). The product was isolated as a white solid (5.2 mg, 12  $\mu$ mol, 50%) with **97% ee** after purification by HPLC (acetonitrile:H<sub>2</sub>O 90:10→100:0 over 10 min, flow rate 1.0 mL/min at 295 K).

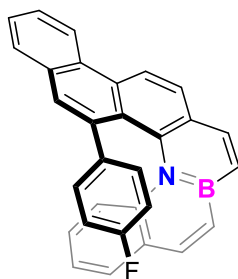

**<sup>1</sup>H NMR** (500 MHz, CDCl<sub>3</sub>, -35 °C)  $\delta$  = 8.84 (d,  $J$  = 8.2 Hz, 1H), 8.79 (d,  $J$  = 8.6 Hz, 1H), 8.21 (d,  $J$  = 10.9 Hz, 1H), 8.09 (d,  $J$  = 8.4 Hz, 1H), 7.92 (dd,  $J$  = 7.8, 1.1 Hz, 1H), 7.76 (ddd,  $J$  = 8.3, 7.0, 1.4 Hz, 1H), 7.68 (ddd,  $J$  = 7.9, 7.0, 1.0 Hz, 1H), 7.64 (d,  $J$  = 11.1 Hz, 1H), 7.40 (s, 1H), 7.38 (d,  $J$  = 10.9 Hz, 1H), 7.34 (dd,  $J$  = 7.7, 1.3 Hz, 1H), 7.10 (ddd,  $J$  = 7.9, 7.0, 1.2 Hz, 1H), 7.06 (d,  $J$  = 11.0 Hz, 1H), 6.93 (ddd,  $J$  = 8.4, 6.8, 1.5 Hz, 1H), 6.87 (d,  $J$  = 8.4 Hz, 1H), 6.59 (td,  $J$  = 8.7, 2.7 Hz, 1H), 6.55 – 6.50 (m, 1H), 6.29 (td,  $J$  = 8.7, 2.7 Hz, 1H), 5.82 – 5.78 (m, 1H) ppm.

**<sup>1</sup>H NMR** (300 MHz, CDCl<sub>3</sub>)  $\delta$  = 8.83 (d,  $J$  = 8.2 Hz, 1H), 8.78 (d,  $J$  = 8.6 Hz, 1H), 8.20 (d,  $J$  = 11.1 Hz, 1H), 8.08 (d,  $J$  = 8.5 Hz, 1H), 7.91 (dd,  $J$  = 7.8, 1.5 Hz, 1H), 7.74 (ddd,  $J$  = 8.4, 7.0, 1.5 Hz, 1H), 7.70 – 7.60 (m, 2H), 7.40 – 7.27 (m, 3H), 7.13 – 7.03 (m, 2H), 6.96 – 6.86 (m, 2H), 6.55 (br. s, 2H), 6.30 (br. s, 1H), 5.83 (br. s, 1H) ppm.

**<sup>13</sup>C NMR** (126 MHz, CDCl<sub>3</sub>, -35 °C)  $\delta$  = 161.0 (d, <sup>1</sup> $J_{C-F}$  = 244.4 Hz, 1Cq), 143.2 (1CH), 142.9 (1CH), 139.1 (1Cq), 136.1 (d, <sup>4</sup> $J_{Cq-F}$  = 3.2 Hz, 1Cq), 135.9 (1Cq), 134.6 (1Cq), 131.9 (br, 1CH-B), 131.5 (1Cq), 130.6 (1Cq), 129.8 (1Cq), 129.5 (1CH), 129.3 (1CH), 128.8 (br, 1CH-B), 128.6 (1CH), 128.4 (1Cq), 128.2 (d, <sup>3</sup> $J_{C-F}$  = 8.3 Hz, 1CH), 127.6 (1CH), 127.5 (1Cq), 127.2 (1CH), 127.0 (1CH), 126.7 (d, <sup>3</sup> $J_{C-F}$  = 8.0 Hz, 1CH), 126.3 (1CH), 123.4 (1CH), 122.5 (1Cq), 122.1 (1CH), 119.8 (1CH), 118.9 (1CH), 114.0 (d, <sup>2</sup> $J_{C-F}$  = 21.2 Hz, 1CH), 113.8 (d, <sup>2</sup> $J_{C-F}$  = 21.6 Hz, 1CH) ppm.

**<sup>11</sup>B NMR** (161 MHz, CDCl<sub>3</sub>)  $\delta$  = 30.64 ppm.

$^{19}\text{F}$  NMR (282 MHz,  $\text{CDCl}_3$ )  $\delta = -117.53$  ppm.

IR (ATR)  $\tilde{\nu} = 3019, 1593, 1555, 1532, 1505, 1482, 1431, 1342, 1282, 1219, 1156, 828, 799, 754, 728$   $\text{cm}^{-1}$ .

HRMS calcd  $m/z$  for  $\text{C}_{30}\text{H}_{20}\text{BFN}$   $[\text{M}+\text{H}]^+$ : 424.1673; found (ESI): 424.1662

$[\alpha]_{25}^D$ : + 916° (c = 0.06 M in DCM) for 97% *ee*.

### Azabora[5]helicene (+)-2h

The product was obtained following the general procedure from **7h** (11.8 mg, 25  $\mu\text{mol}$ ). NMR analysis of the crude mixture showed a regioselectivity of 84:16 (**2h**: **S11h**). The product was isolated as a white solid (3.6 mg, 7  $\mu\text{mol}$ , 30%) with 88% *ee* after purification by HPLC (acetonitrile: $\text{H}_2\text{O}$  90:10 $\rightarrow$ 100:0 over 10 min, flow rate 1.0 mL/min at 295 K).

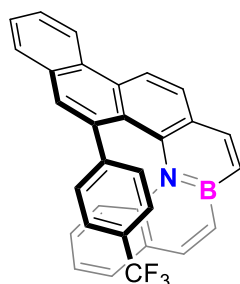

$^1\text{H}$  NMR (500 MHz,  $\text{CDCl}_3$ ,  $-35$  °C)  $\delta = 8.86$  (d,  $J = 8.2$  Hz, 1H), 8.81 (d,  $J = 8.6$  Hz, 1H), 8.21 (d,  $J = 11.0$  Hz, 1H), 8.11 (d,  $J = 8.2$  Hz, 1H), 7.94 (d,  $J = 7.9$  Hz, 1H), 7.78 (t,  $J = 7.7$  Hz, 1H), 7.70 (t,  $J = 7.3$  Hz, 1H), 7.52 (d,  $J = 11.2$  Hz, 1H), 7.48 (s, 1H), 7.38 (d,  $J = 10.9$  Hz, 1H), 7.28 – 7.27 (m, 1H), 7.14 (d,  $J = 8.0$  Hz, 1H), 7.09 (t,  $J = 7.2$  Hz, 1H), 7.04 (d,  $J = 11.1$  Hz, 1H), 6.96 – 6.91 (m, 1H), 6.87 (d,  $J = 8.4$  Hz, 1H), 6.82 (d,  $J = 8.2$  Hz, 1H), 6.68 (d,  $J = 8.0$  Hz, 1H), 5.94 (d,  $J = 8.2$  Hz, 1H) ppm.

$^1\text{H}$  NMR (300 MHz,  $\text{CDCl}_3$ )  $\delta = 8.85$  (d,  $J = 8.6$  Hz, 1H), 8.80 (d,  $J = 8.5$  Hz, 1H), 8.21 (d,  $J = 11.0$  Hz, 1H), 8.10 (d,  $J = 8.5$  Hz, 1H), 7.93 (dd,  $J = 7.8, 1.1$  Hz, 1H), 7.77 (ddd,  $J = 8.4, 7.2, 1.5$  Hz, 1H), 7.68 (ddd,  $J = 8.0, 7.0, 0.9$  Hz, 1H), 7.53 (d,  $J = 11.4$  Hz, 1H), 7.47 (s, 1H), 7.39 (d,  $J = 11.0$  Hz, 1H), 7.31 – 7.27 (m, 1H), 7.18 – 7.01 (m, 3H), 6.98 – 6.80 (m, 3H), 6.69 (br. m, 1H), 5.97 (br. m, 1H) ppm.

$^{13}\text{C}$  NMR (126 MHz,  $\text{CDCl}_3$ ,  $-35$  °C)  $\delta = 143.3$  (1CH), 143.1 (1Cq), 143.0 (1CH), 138.7 (1Cq), 135.6 (1Cq), 134.4 (1Cq), 131.3 (1Cq), 130.7 (1Cq), 130.1 (1Cq), 129.7 (1CH), 129.6 (1CH), 128.8 (1CH), 128.6 (1Cq), 127.9 (1CH), 127.5 (1Cq), 127.4 (1CH), 127.3 (1CH), 127.28 – 126.96 (m, 1Cq), 126.8 (1CH), 126.4 (1CH), 125.6 – 123.0 (m, 1Cq), 125.2 (1CH), 124.0 (q,  $^3J_{\text{C-F}} = 3.6$  Hz, 1CH), 123.8 (q,  $^3J_{\text{C-F}} = 3.8$  Hz, 1CH), 123.5 (1CH), 122.2 (1CH), 122.1 (1Cq), 120.1 (1CH), 119.0 (1CH) ppm. The carbon atoms bonded to boron are not observed.

$^{11}\text{B}$  NMR (161 MHz,  $\text{CDCl}_3$ )  $\delta = 30.76$  ppm.

$^{19}\text{F}$  NMR (282 MHz,  $\text{CDCl}_3$ )  $\delta = -62.52$  ppm.

IR (ATR)  $\tilde{\nu} = 3021, 1593, 1323, 1281, 1164, 1120, 1066, 1015, 831, 756$   $\text{cm}^{-1}$ .

HRMS calcd  $m/z$  for  $\text{C}_{31}\text{H}_{19}\text{BF}_3\text{NNa}$   $[\text{M}+\text{Na}]^+$ : 496.1457; found (ESI): 496.2685

$[\alpha]_{25}^D$ : + 560° (c = 0.03 in DCM) for 88% *ee*.

## Compound **S10a**

Compound **S10a** was prepared following the general procedure from **5a** (13.1 mg, 25  $\mu$ mol). NMR analysis of the crude mixture showed a regioselectivity of 88:12 (**1a**: **S10a**). The product was isolated as a white solid (1.0 mg, 2  $\mu$ mol, 7%) after purification by HPLC (acetonitrile:H<sub>2</sub>O 95:5 $\rightarrow$ 100:0 over 5 min, flow rate 1.0 mL/min at 295 K).

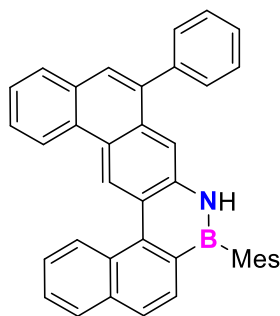

**<sup>1</sup>H NMR** (300 MHz, CDCl<sub>3</sub>)  $\delta$  = 10.19 (s, 1H), 9.24 (d,  $J$  = 8.8 Hz, 1H), 8.79 (d,  $J$  = 8.1 Hz, 1H), 8.06 (d,  $J$  = 7.7 Hz, 1H), 7.93 (d,  $J$  = 7.9 Hz, 1H), 7.87 – 7.46 (m, 14H), 6.92 (s, 2H), 2.36 (s, 3H), 2.12 (s, 6H) ppm.

**<sup>13</sup>C NMR** (126 MHz, CDCl<sub>3</sub>)  $\delta$  = 140.8 (1Cq), 140.4 (1Cq), 138.9 (1Cq), 138.2 (1Cq), 137.9 (1Cq), 137.8 (1Cq), 136.6 (1Cq), 131.4 (1CH), 131.2 (1Cq), 131.0 (1Cq), 130.8 (1Cq), 130.2 (1Cq), 130.1 (2CH), 129.1 (1CH), 129.0 (1CH), 128.7 (2CH), 128.5 (1CH), 128.0 (1CH), 127.8 (1CH), 127.28 (2CH), 127.26 (1CH), 127.24 (1CH), 127.0 (1CH), 126.4 (2CH), 125.2 (1CH), 125.1 (1Cq), 125.0 (1Cq), 123.6 (1Cq), 122.3 (1CH), 114.3 (1CH), 23.0 (2CH<sub>3</sub>), 21.4 (1CH<sub>3</sub>) ppm.

**<sup>11</sup>B NMR** (161 MHz, CDCl<sub>3</sub>)  $\delta$  = 41.95 ppm.

**IR (ATR)**  $\tilde{\nu}$  = 3364, 3051, 2918, 2851, 1614, 1550, 1469, 1431, 972, 748, 701 cm<sup>-1</sup>.

**HRMS** calcd  $m/z$  for C<sub>39</sub>H<sub>31</sub>BN [M+H]<sup>+</sup>: 524.2551; found (ESI): 524.2550

## Compound **10b**

Compound **10b** was prepared following the general procedure from **5b** (13.0 mg, 25  $\mu$ mol). NMR analysis of the crude mixture showed a regioselectivity of 85:15 (**1b**:**10b**). The product was isolated as a white solid (1.0 mg, 2  $\mu$ mol, 8%) after purification by HPLC (acetonitrile:H<sub>2</sub>O 95:5 $\rightarrow$ 100:0 over 5 min, flow rate 1.0 mL/min at 295 K).

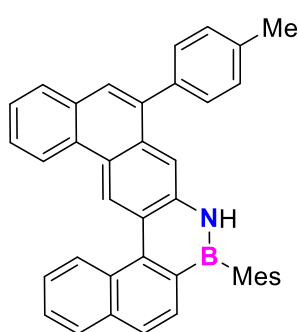

**<sup>1</sup>H NMR** (400 MHz, CD<sub>2</sub>Cl<sub>2</sub>)  $\delta$  = 10.19 (s, 1H), 9.25 (d,  $J$  = 8.5 Hz, 1H), 8.80 (d,  $J$  = 8.2 Hz, 1H), 8.07 (dd,  $J$  = 8.1, 1.4 Hz, 1H), 7.97 – 7.92 (m, 2H), 7.88 – 7.85 (m, 2H), 7.80 (ddd,  $J$  = 8.5, 6.9, 1.6 Hz, 1H), 7.75 – 7.70 (m, 3H), 7.67 – 7.60 (m, 2H), 7.56 (d,  $J$  = 8.0 Hz, 2H), 7.39 (d,  $J$  = 7.8 Hz, 2H), 6.92 (s, 2H), 2.49 (s, 3H), 2.35 (s, 3H), 2.11 (s, 6H) ppm.

**<sup>13</sup>C NMR** (101 MHz, CD<sub>2</sub>Cl<sub>2</sub>)  $\delta$  = 140.1 (2Cq), 138.9 (1Cq), 138.0 (1Cq), 137.8 (1Cq), 137.7 (1Cq), 137.6 (1Cq), 137.5 (1Cq), 136.5 (1Cq), 131.2 (1Cq), 131.1 (1CH), 131.0 (1Cq), 130.5 (1Cq), 130.1 (1Cq), 129.9 (2CH), 129.2 (2CH), 128.9 (1CH), 128.8 (1CH), 128.2 (1CH), 127.8 (1CH), 127.12 (3CH), 127.07 (1CH), 127.0 (1CH), 126.4 (1CH), 126.3 (1CH), 125.0 (1CH), 124.9 (1Cq), 123.4 (1Cq), 122.2 (1CH), 114.4 (1CH), 22.6 (2CH<sub>3</sub>), 21.1 (1CH<sub>3</sub>), 21.0 (1CH<sub>3</sub>) ppm. The carbon atoms bonded to the boron were not observed.

**<sup>11</sup>B NMR** (161 MHz, CD<sub>2</sub>Cl<sub>2</sub>)  $\delta$  = 41.15 ppm.

**IR (ATR)**  $\tilde{\nu}$  = 3364, 3025, 2912, 2851, 1610, 1550, 1469, 1428, 1336, 997, 820, 746 728  $\text{cm}^{-1}$ .

**HRMS** calcd  $m/z$  for  $\text{C}_{40}\text{H}_{33}\text{BN}$   $[\text{M}+\text{H}]^+$ : 538.2707; found (ESI): 538.2709

**M.p.** = 186 °C

### Compound **S10c**

Compound **S10c** was prepared following the general procedure from **5c** (13.8 mg, 25  $\mu\text{mol}$ ). NMR analysis of the crude mixture showed a regioselectivity of 71:29 (**1c**: **S10c**). The product was isolated as a white solid (2.2 mg, 4  $\mu\text{mol}$ , 17%) after purification by HPLC (acetonitrile: $\text{H}_2\text{O}$  95:5 $\rightarrow$ 100:0 over 5 min, flow rate 1.0 mL/min at 295 K).

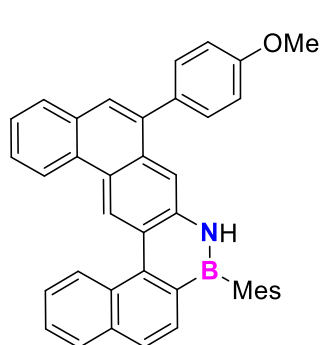

**$^1\text{H}$  NMR** (400 MHz,  $\text{CD}_2\text{Cl}_2$ )  $\delta$  = 10.19 (s, 1H), 9.25 (d,  $J$  = 8.5 Hz, 1H), 8.80 (d,  $J$  = 8.2 Hz, 1H), 8.07 (dd,  $J$  = 8.0, 1.4 Hz, 1H), 7.97 (br. s, 1H), 7.94 (dd,  $J$  = 7.8, 1.3 Hz, 1H), 7.88 – 7.85 (m, 2H), 7.80 (ddd,  $J$  = 8.5, 6.8, 1.6 Hz, 1H), 7.76 – 7.69 (m, 3H), 7.68 – 7.58 (m, 4H), 7.15 – 7.07 (m, 2H), 6.93 – 6.91 (m, 2H), 3.91 (s, 3H), 2.35 (s, 3H), 2.11 (s, 6H) ppm.

**$^{13}\text{C}$  NMR** (101 MHz,  $\text{CD}_2\text{Cl}_2$ )  $\delta$  = 159.4 (1Cq), 140.2 (3 Cq), 138.9 (1Cq), 138.0 (1Cq), 137.7 (1Cq), 137.4 (1Cq), 136.5 (1Cq), 132.9 (1Cq), 131.21 (1Cq), 131.15 (3CH), 130.5 (1Cq), 130.1 (1Cq), 128.9 (1CH), 128.8 (1CH), 128.2 (1CH), 127.8 (1CH), 127.1 (3CH), 127.02 (1CH), 126.97 (1CH), 126.4 (1CH), 126.3 (1CH), 125.01 (1CH), 124.95 (1Cq), 123.4 (1Cq), 122.2 (1CH), 114.4 (1CH), 114.0 (2CH), 55.5 (1 $\text{CH}_3$ ), 22.6 (2 $\text{CH}_3$ ), 21.0 (1 $\text{CH}_3$ ) ppm. The carbon atoms bonded to the boron were not observed.

**$^{11}\text{B}$  NMR** (161 MHz,  $\text{CD}_2\text{Cl}_2$ )  $\delta$  = 41.02 ppm.

**IR (ATR)**  $\tilde{\nu}$  = 3364, 3043, 2915, 2832, 1608, 1605, 1550, 1509, 1469, 1430, 1335, 1287, 1245, 1173, 1034, 827, 737  $\text{cm}^{-1}$ .

**HRMS**: calcd  $m/z$  for  $\text{C}_{40}\text{H}_{32}\text{BNO}$   $[\text{M}]^+$ : 553.2572; found (ESI): 553.2570

### Compound **S10d**

Compound **S10d** was prepared following the general procedure from **5d** (15.4 mg, 25  $\mu\text{mol}$ ). NMR analysis of the crude mixture showed a regioselectivity of 81:19 (**1d**: **S10d**). The product was isolated as a white solid (2.0 mg, 3  $\mu\text{mol}$ , 10%) after purification by HPLC (acetonitrile: $\text{H}_2\text{O}$  95:5 $\rightarrow$ 100:0 over 5 min, flow rate 1.0 mL/min at 295 K).

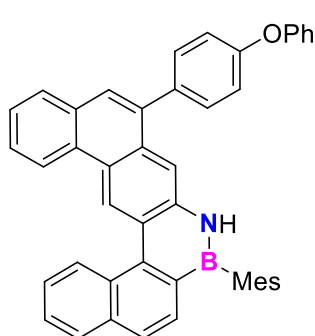

**$^1\text{H NMR}$**  (300 MHz,  $\text{CD}_2\text{Cl}_2$ )  $\delta$  = 10.20 (s, 1H), 9.25 (d,  $J$  = 8.4 Hz, 1H), 8.81 (d,  $J$  = 8.2 Hz, 1H), 8.08 (d,  $J$  = 7.9 Hz, 1H), 8.00 (br. s, 1H), 7.95 (d,  $J$  = 8.1 Hz, 1H), 7.90 – 7.85 (m, 2H), 7.81 (ddd,  $J$  = 8.5, 6.8, 1.5 Hz, 1H), 7.77 – 7.60 (m, 7H), 7.45 – 7.37 (m, 2H), 7.24 – 7.12 (m, 5H), 6.93 (s, 2H), 2.36 (s, 3H), 2.12 (s, 6H) ppm.

**$^{13}\text{C NMR}$**  (101 MHz,  $\text{CD}_2\text{Cl}_2$ )  $\delta$  = 157.6 (1Cq), 157.4 (1Cq), 140.5 (2Cq), 139.3 (1Cq), 138.4 (1Cq), 138.0 (1Cq), 137.5 (1Cq), 136.9 (1Cq), 135.9 (1Cq), 131.8 (2CH), 131.49 (1CH), 131.46 (1Cq), 131.3 (1Cq), 130.9 (1Cq), 130.4 (1Cq), 130.3 (2CH), 129.3 (1CH), 129.2 (1CH), 128.7 (1CH), 128.2 (1CH), 127.51 (2CH), 127.48 (2CH), 127.3 (1CH), 126.8 (1CH), 126.7 (1CH), 125.4 (1CH), 125.3 (1Cq), 123.9 (1CH), 123.8 (1Cq), 122.6 (1CH), 119.4 (2CH), 119.2 (2CH), 114.6 (1CH), 22.9 (2CH<sub>3</sub>), 21.4 (1CH<sub>3</sub>) ppm. The carbon atoms bonded to the boron were not observed.

**$^{11}\text{B NMR}$**  (161 MHz,  $\text{CD}_2\text{Cl}_2$ )  $\delta$  = 40.99 ppm.

**IR (ATR)**  $\tilde{\nu}$  = 3369, 3040, 2912, 2853, 1618, 1608, 1588, 1550, 1503, 1488, 1470, 1431, 1236  $\text{cm}^{-1}$ .

**HRMS** calcd  $m/z$  for  $\text{C}_{45}\text{H}_{35}\text{BNO}$   $[\text{M}+\text{H}]^+$ : 616.2814; found (ESI): 616.2796

#### Compound **S10e**

Compound **S10e** was prepared following the general procedure from **5e** (13.5 mg, 25  $\mu\text{mol}$ ). NMR analysis of the crude mixture showed a regioselectivity of 90:10 (**1e**: **S10e**). The product was isolated as a white solid (1.0 mg, 2  $\mu\text{mol}$ , 7%) after purification by HPLC (acetonitrile: $\text{H}_2\text{O}$  95:5 $\rightarrow$ 100:0 over 5 min, flow rate 1.0 mL/min at 295 K).

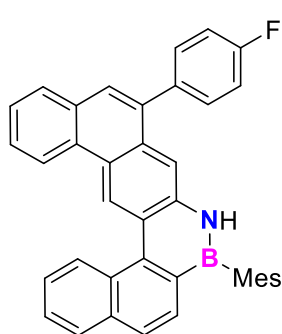

**$^1\text{H NMR}$**  (500 MHz,  $\text{CD}_2\text{Cl}_2$ )  $\delta$  = 10.20 (s, 1H), 9.24 (d,  $J$  = 8.5 Hz, 1H), 8.81 (d,  $J$  = 8.3 Hz, 1H), 8.08 (dd,  $J$  = 8.0, 1.0 Hz, 1H), 7.96 (br. s, 1H), 7.95 (dd,  $J$  = 7.9, 0.9 Hz, 1H), 7.87 (d,  $J$  = 8.1 Hz, 1H), 7.82 – 7.78 (m, 2H), 7.76 – 7.71 (m, 3H), 7.67 – 7.62 (m, 4H), 7.30 – 7.25 (m, 2H), 6.92 (s, 2H), 2.35 (s, 3H), 2.11 (s, 6H) ppm.

**$^{13}\text{C NMR}$**  (126 MHz,  $\text{CD}_2\text{Cl}_2$ )  $\delta$  = 162.9 (d,  $J$  = 245.8 Hz, 1Cq), 140.5 (2Cq), 139.3 (1Cq), 138.3 (1Cq), 138.0 (1Cq), 137.1 (1Cq), 137.0 (1Cq), 136.9 (1Cq), 132.12 (1CH), 132.05 (1CH), 131.5 (1CH), 131.3 (1Cq), 131.2 (1Cq), 131.0 (1Cq), 130.4 (1Cq), 129.3 (1CH), 129.2 (1CH), 128.9 (1CH), 128.1 (1CH), 127.6 (1CH), 127.54 (1CH), 127.47 (2CH), 127.3 (1CH), 126.8 (1CH), 126.7 (1CH), 125.4 (1CH), 125.2 (1Cq), 123.9 (1Cq), 122.6 (1CH), 115.8 (1CH), 115.7 (1CH), 114.5 (1CH), 22.9 (2CH<sub>3</sub>), 21.4 (1CH<sub>3</sub>) ppm. The carbon atoms bonded to boron were not observed.

**$^{11}\text{B NMR}$**  (161 MHz,  $\text{CD}_2\text{Cl}_2$ )  $\delta$  = 41.40 ppm.

**$^{19}\text{F NMR}$**  (282 MHz,  $\text{CD}_2\text{Cl}_2$ )  $\delta$  = -115.64 ppm.

**IR (ATR)**  $\tilde{\nu}$  = 3373, 3045, 2920, 2854, 1608, 1550, 1507, 1470, 1431, 1226, 1157, 836, 750  $\text{cm}^{-1}$ .

**HRMS** calcd  $m/z$  for  $C_{39}H_{29}BFN$   $[M+H]^+$ : 542.2456; found (ESI): 542.2437

### Compound **S10i**

Compound **S10i** was prepared following the general procedure from **5i** (13.8 mg, 25  $\mu$ mol) at 0 °C. NMR analysis of the crude mixture showed a regioselectivity of 65:35 (**1i**: **S10i**). The product was isolated as a white solid (4.1 mg, 7  $\mu$ mol, 30%) after purification by HPLC (acetonitrile:H<sub>2</sub>O 95:5→100:0 over 5 min, flow rate 1.0 mL/min at 295 K).

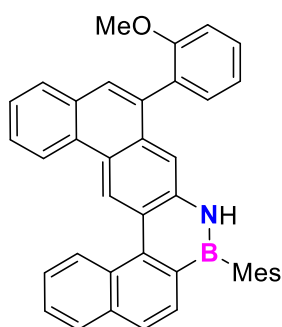

**<sup>1</sup>H NMR** (300 MHz, CD<sub>2</sub>Cl<sub>2</sub>)  $\delta$  = 10.17 (s, 1H), 9.25 (d,  $J$  = 8.8 Hz, 1H), 8.81 (d,  $J$  = 8.0 Hz, 1H), 8.07 (d,  $J$  = 8.2 Hz, 1H), 7.95 – 7.89 (m, 2H), 7.86 (d,  $J$  = 8.1 Hz, 1H), 7.83 – 7.58 (m, 6H), 7.54 – 7.47 (m, 2H), 7.44 (dd,  $J$  = 7.3, 1.6 Hz, 1H), 7.19 – 7.11 (m, 2H), 6.92 (s, 2H), 3.75 (s, 3H), 2.34 (s, 3H), 2.11 (s, 3H), 2.10 (s, 3H) ppm.

**<sup>13</sup>C NMR** (126 MHz, CDCl<sub>3</sub>)  $\delta$  = 157.67 (1Cq), 140.42 (1Cq), 140.39 (1Cq), 138.85 (1Cq), 138.33 (1Cq), 137.74 (1Cq), 136.59 (1Cq), 134.84 (1Cq), 132.10 (1CH), 131.37 (1CH), 131.36 (1Cq), 131.28 (1Cq), 130.95 (1Cq), 130.20 (1Cq), 129.50 (1Cq), 129.49 (1CH), 129.08 (1CH), 128.95 (1CH), 128.90 (1CH), 128.06 (1CH), 127.28 (1CH), 127.23 (1CH), 127.11 (1CH), 127.07 (1CH), 126.94 (1CH), 126.27 (1CH), 126.15 (1CH), 125.04 (1CH), 124.80 (1Cq), 123.53 (1Cq), 122.33 (1CH), 120.96 (1CH), 114.32 (1CH), 111.30 (1CH), 55.87 (1CH<sub>3</sub>), 23.02 (1CH<sub>3</sub>), 22.97 (1CH<sub>3</sub>), 21.41 (1CH<sub>3</sub>) ppm. The carbon atoms bonded to boron were not observed.

**<sup>11</sup>B NMR** (128 MHz, CDCl<sub>3</sub>)  $\delta$  = 41.08 ppm.

**IR (ATR)**  $\tilde{\nu}$  = 3372, 3046, 2927, 2856, 1618, 1550, 1470, 1432, 1247, 1028 cm<sup>-1</sup>.

**HRMS**: calcd  $m/z$  for  $C_{40}H_{32}BNNaO$   $[M+Na]^+$ : 576.2476; found (ESI) 576.2459

### Compound **S10j**

Compound **S10j** was prepared following the general procedure from **5j** (13.8 mg, 25  $\mu$ mol). NMR analysis of the crude mixture showed a regioselectivity of 85:15 (**1j**: **S10j**). The product was isolated as a white solid (1.2 mg, 2  $\mu$ mol, 10 %) after purification by HPLC (acetonitrile:H<sub>2</sub>O 95:5→100:0 over 5 min, flow rate 1.0 mL/min at 295 K).

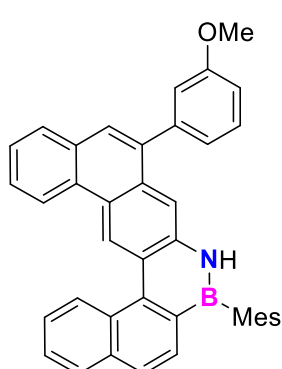

**<sup>1</sup>H NMR** (500 MHz, CD<sub>2</sub>Cl<sub>2</sub>)  $\delta$  = 10.19 (s, 1H), 9.24 (d,  $J$  = 8.5 Hz, 1H), 8.81 (d,  $J$  = 8.1 Hz, 1H), 8.07 (dd,  $J$  = 8.0, 1.5 Hz, 1H), 7.97 (br. s, 1H), 7.95 (dd,  $J$  = 7.7, 1.4 Hz, 1H), 7.88 – 7.85 (m, 2H), 7.80 (ddd,  $J$  = 8.5, 6.8, 1.5 Hz, 1H), 7.75 (s, 1H), 7.75 – 7.71 (m, 2H), 7.67 – 7.62 (m, 2H), 7.48 (ddd,  $J$  = 8.3, 7.5, 0.3 Hz, 1H), 7.25 (ddd,  $J$  = 7.5, 1.6, 1.0 Hz, 1H), 7.21 (dd,  $J$  = 2.5, 1.6 Hz, 1H), 7.04 (ddd,  $J$  = 8.3, 2.7, 1.0 Hz, 1H), 6.93 – 6.91 (m, 2H), 3.88 (s, 3H), 2.35 (s, 3H), 2.11 (s, 6H) ppm.

**<sup>13</sup>C NMR** (126 MHz, CD<sub>2</sub>Cl<sub>2</sub>)  $\delta$  = 160.3 (1Cq), 142.4 (1Cq), 140.5 (2Cq), 139.3 (1Cq), 138.3 (1Cq), 138.0 (2Cq), 136.9 (1Cq), 131.5 (1CH), 131.4 (1Cq), 131.1 (1Cq), 130.9 (1Cq), 130.4 (1Cq), 129.9 (1CH), 129.3 (1CH), 129.1 (1CH), 128.6 (1CH), 128.2 (1CH), 127.6 (1CH), 127.49 (1CH), 127.46 (2CH), 127.3 (1CH),

126.75 (1CH), 126.67 (1CH), 125.3 (1CH), 125.2 (1Cq), 123.8 (1Cq), 122.8 (1CH), 122.6 (1CH), 116.0 (1CH), 114.7 (1CH), 113.5 (1CH), 55.8 (1CH<sub>3</sub>), 22.9 (2CH<sub>3</sub>), 21.4 (1CH<sub>3</sub>) ppm. The carbon atoms bonded to boron were not observed.

<sup>11</sup>B NMR (161 MHz, CD<sub>2</sub>Cl<sub>2</sub>)  $\delta$  = 40.26 ppm.

IR (ATR)  $\tilde{\nu}$  = 3366, 2923, 2851, 1608, 1550, 1469, 1430, 1041, 991 cm<sup>-1</sup>.

HRMS: calcd  $m/z$  for C<sub>40</sub>H<sub>32</sub>BNNaO [M+Na]<sup>+</sup>: 576.2476; found (ESI) 576.2454

#### Compound **S10b(BPh)**

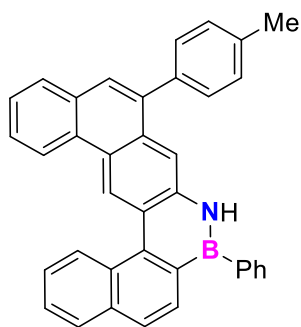

Compound **S10b(BPh)** was prepared following the general procedure from **S5b(BPh)** (12.4 mg, 25  $\mu$ mol). NMR analysis of the crude mixture showed a regioselectivity of 87:13 (**1b(BPh)**: **S10b(BPh)**). The product was isolated as a white solid (1.0 mg, 2  $\mu$ mol, 10 %) after purification by HPLC (acetonitrile:H<sub>2</sub>O 95:5 $\rightarrow$ 100:0 over 5 min, flow rate 1.0 mL/min at 295 K).

<sup>1</sup>H NMR (400 MHz, CDCl<sub>3</sub>)  $\delta$  = 10.14 (s, 1H), 9.20 (d,  $J$  = 8.4 Hz, 1H), 8.76 (d,  $J$  = 8.1 Hz, 1H), 8.21 (d,  $J$  = 8.2 Hz, 1H), 8.09 (dd,  $J$  = 8.1, 1.3 Hz, 1H), 7.96 – 7.89 (m, 3H), 7.85 (s, 1H), 7.82 – 7.68 (m, 6H), 7.61 (t,  $J$  = 7.3 Hz, 1H), 7.56 (d,  $J$  = 8.1 Hz, 2H), 7.53 – 7.46 (m, 3H), 7.40 (d,  $J$  = 7.9 Hz, 2H), 2.52 (s, 3H) ppm.

<sup>13</sup>C NMR (101 MHz, CDCl<sub>3</sub>)  $\delta$  = 139.1 (1Cq), 138.8 (1Cq), 137.9 (1Cq), 137.8 (1Cq), 137.5 (1Cq), 136.4 (1Cq), 133.5 (2CH), 131.4 (1CH), 131.3 (1Cq), 131.2 (1Cq), 130.7 (1Cq), 130.15 (1Cq), 130.05 (2CH), 129.4 (2CH), 129.0 (1CH), 128.9 (1CH), 128.8 (1CH), 128.4 (1CH), 128.2 (2CH), 128.1 (1CH), 127.2 (1CH), 127.1 (1CH), 127.0 (1CH), 126.4 (2CH), 125.3 (1CH), 125.1 (1Cq), 123.5 (1Cq), 122.3 (1CH), 114.5 (1CH), 21.5 (1CH<sub>3</sub>). The carbon atoms bonded to the boron were not observed.

<sup>11</sup>B NMR (161 MHz, CDCl<sub>3</sub>)  $\delta$  = 38.43 ppm.

IR (ATR)  $\tilde{\nu}$  = 3383, 3048, 3024, 2921, 2853, 1619, 1546, 1471, 1430, 1339, 821, 746, 704 cm<sup>-1</sup>.

HRMS calcd  $m/z$  for C<sub>37</sub>H<sub>26</sub>BNNa [M+Na]<sup>+</sup>: 518.2057; found (ESI): 518.2049

#### Compound **S10b(NMe)**

Compound **S10b(NMe)** was prepared following the general procedure from **S5b(NMe)** (13.8 mg, 25  $\mu$ mol). NMR analysis of the crude mixture showed a regioselectivity of 43:57 (**1b(NMe)**: **S10b(NMe)**). The product was isolated as a white solid (6.3 mg, 11  $\mu$ mol, 46%) after purification by HPLC (acetonitrile:H<sub>2</sub>O 95:5 $\rightarrow$ 100:0 over 5 min, flow rate 1.0 mL/min at 295 K).

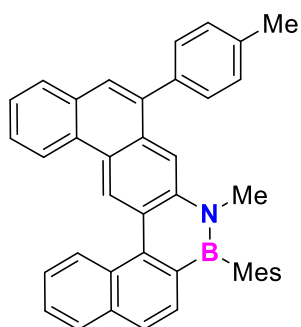

**$^1\text{H}$  NMR** (500 MHz,  $\text{CD}_2\text{Cl}_2$ )  $\delta$  = 10.12 (s, 1H), 9.12 (d,  $J$  = 8.5 Hz, 1H), 8.78 (d,  $J$  = 8.3 Hz, 1H), 8.25 (s, 1H), 8.04 (dd,  $J$  = 8.1, 1.1 Hz, 1H), 7.95 (dd,  $J$  = 8.0, 1.1 Hz, 1H), 7.81 – 7.74 (m, 3H), 7.73 – 7.68 (m, 2H), 7.65 – 7.60 (m, 3H), 7.42 (d,  $J$  = 8.0 Hz, 1H), 7.39 (d,  $J$  = 7.7 Hz, 2H), 6.93 (s, 2H), 3.43 (s, 3H), 2.47 (s, 3H), 2.34 (s, 3H), 1.98 (s, 6H) ppm.

**$^{13}\text{C}$  NMR** (126 MHz,  $\text{CD}_2\text{Cl}_2$ )  $\delta$  = 140.8 (1Cq), 139.5 (2Cq), 138.1 (1Cq), 137.54 (1Cq), 137.49 (1Cq), 137.44 (1Cq), 137.2 (1Cq), 137.1 (br, 1Cq-B), 136.1 (1Cq), 131.9 (br, 1Cq-B), 130.98 (1Cq), 130.96 (1CH), 130.3 (1Cq), 129.9 (1Cq), 129.7 (2CH), 129.4 (1Cq), 129.3 (2CH), 128.8 (1CH), 128.6 (1CH), 128.3 (1CH), 127.9 (1CH), 126.99 (2CH), 126.96 (1CH), 126.9 (1CH), 126.8 (1CH), 126.4 (1CH), 126.3 (1CH), 125.2 (1CH), 124.23 (1Cq), 124.17 (1Cq), 122.2 (1CH), 111.5 (1CH), 36.1 (1CH<sub>3</sub>), 22.3 (2CH<sub>3</sub>), 21.2 (1CH<sub>3</sub>), 21.1 (1CH<sub>3</sub>) ppm.

**$^{11}\text{B}$  NMR** (161 MHz,  $\text{CD}_2\text{Cl}_2$ )  $\delta$  = 40.37 ppm.

**IR (ATR)**  $\tilde{\nu}$  = 2918, 1605, 1550, 1507, 1468, 1418, 1354, 1308, 1280, 817, 747  $\text{cm}^{-1}$ .

**HRMS** calcd  $m/z$  for  $\text{C}_{41}\text{H}_{34}\text{BN}$  [ $\text{M}$ ]<sup>+</sup>: 551.2786; found (ESI): 551.2799

### Compound **11b**

Compound **11b** was prepared following the general procedure from **7b** (10.5 mg, 25  $\mu\text{mol}$ ). NMR analysis of the crude mixture showed a regioselectivity of 42:58 (**2b**:**11b**). The product was isolated as a white solid (5.2 mg, 12  $\mu\text{mol}$ , 50%) after purification by HPLC (acetonitrile:H<sub>2</sub>O 95:5→100:0 over 5 min, flow rate 1.0 mL/min at 295 K).

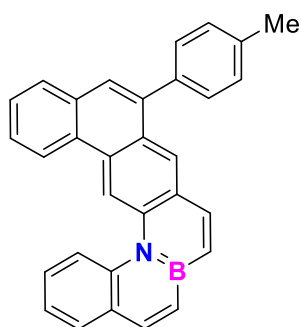

**$^1\text{H}$  NMR** (400 MHz,  $\text{CDCl}_3$ )  $\delta$  = 9.93 (s, 1H), 8.80 (d,  $J$  = 8.6 Hz, 1H), 8.63 – 8.58 (m, 1H), 8.30 (s, 1H), 8.09 (d,  $J$  = 11.3 Hz, 1H), 8.03 (d,  $J$  = 11.2 Hz, 1H), 7.93 – 7.89 (m, 1H), 7.86 (dd,  $J$  = 7.8, 1.6 Hz, 1H), 7.67 – 7.62 (m, 3H), 7.58 – 7.53 (m, 3H), 7.44 – 7.38 (m, 3H), 7.25 (d,  $J$  = 11.2 Hz, 1H), 7.21 (d,  $J$  = 11.2 Hz, 1H), 2.53 (s, 3H) ppm.

**$^{13}\text{C}$  NMR** (101 MHz,  $\text{CDCl}_3$ )  $\delta$  = 143.9 (1CH), 143.4 (1CH), 139.5 (1Cq), 138.6 (1Cq), 137.8 (1Cq), 137.5 (1Cq), 137.2 (1Cq), 132.4 (1Cq), 130.3 (1CH), 130.1 (2CH), 129.9 (1Cq), 129.8 (1Cq), 129.4 (2CH), 129.22 (1CH), 129.18 (1CH), 129.0 (1CH), 127.8 (1CH), 127.34 (1Cq), 127.31 (1CH), 127.0 (1CH), 126.8 (2CH), 123.0 (1CH), 122.8 (1CH), 120.6 (1CH), 114.8 (1CH), 21.5 (1CH<sub>3</sub>) ppm. The carbon atoms bonded to boron were not observed.

**$^{11}\text{B}$  NMR** (161 MHz,  $\text{CDCl}_3$ )  $\delta$  = 31.36 ppm.

**IR (ATR)**  $\tilde{\nu}$  = 3011, 2918, 2851, 1592, 1549, 1472, 1439, 1404, 1368, 1296, 1252, 1211, 1180, 905, 813, 785, 761, 746, 732  $\text{cm}^{-1}$ .

**HRMS**: calcd  $m/z$  for  $\text{C}_{31}\text{H}_{23}\text{BN}$  [ $\text{M}+\text{H}$ ]<sup>+</sup>: 420.1923; found (ESI) 420.1933

**M.p.** = 220 °C

## Compound S11c

Compound **S11c** was prepared following the general procedure from **7c** (10.9 mg, 25  $\mu$ mol). NMR analysis of the crude mixture showed a regioselectivity of 13:87 (**2c**: **S11c**). The product was isolated as a white solid (7.6 mg, 17  $\mu$ mol, 70%) after purification by HPLC (acetonitrile:H<sub>2</sub>O 90:10 $\rightarrow$ 100:0 over 20 min, flow rate 1.0 mL/min at 295 K).

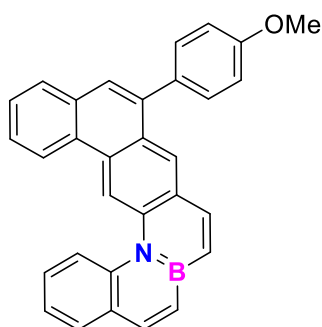

**<sup>1</sup>H NMR** (400 MHz, CDCl<sub>3</sub>)  $\delta$  = 9.92 (s, 1H), 8.79 (d,  $J$  = 8.7 Hz, 1H), 8.63 – 8.58 (m, 1H), 8.29 (s, 1H), 8.09 (d,  $J$  = 11.2 Hz, 1H), 8.03 (d,  $J$  = 11.4 Hz, 1H), 7.93 – 7.89 (m, 1H), 7.86 (dd,  $J$  = 7.8, 1.6 Hz, 1H), 7.67 – 7.52 (m, 6H), 7.41 (ddd,  $J$  = 7.9, 7.1, 1.0 Hz, 1H), 7.25 (d,  $J$  = 11.2 Hz, 1H), 7.21 (d,  $J$  = 11.3 Hz, 1H), 7.15 – 7.11 (m, 2H), 3.96 (s, 3H) ppm.

**<sup>13</sup>C NMR** (101 MHz, CDCl<sub>3</sub>)  $\delta$  = 159.4 (1Cq), 143.9 (1CH), 143.4 (1CH), 139.5 (1Cq), 138.3 (1Cq), 137.2 (1Cq), 133.1 (1Cq), 132.4 (1Cq), 131.3 (2CH), 130.3 (1CH), 129.82 (1Cq), 129.76 (1Cq), 129.23 (1Cq), 129.17 (1Cq), 128.9 (1CH), 127.8 (1CH), 127.5 (1Cq), 127.3 (1CH), 127.0 (1CH), 126.8 (2CH), 123.0 (1CH), 122.7 (1CH), 120.5 (1CH), 114.8 (1CH), 114.1 (2CH), 55.6 (1CH<sub>3</sub>) ppm.

**<sup>11</sup>B NMR** (128 MHz, CDCl<sub>3</sub>)  $\delta$  = 31.90 ppm.

**IR (ATR)**  $\tilde{\nu}$  = 3008, 2832, 1592, 1509, 1285, 1247, 1029, 831, 809, 756 cm<sup>-1</sup>.

**HRMS:** calcd  $m/z$  for C<sub>31</sub>H<sub>23</sub>BNO [M+H]<sup>+</sup>: 436.1867; found (ESI) 436.1871

## Compound S11e

Compound **S11e** was prepared following the general procedure from **7e** (10.6 mg, 25  $\mu$ mol). NMR analysis of the crude mixture showed a regioselectivity of 57:43 (**2e**: **S11e**). The product was isolated as a white solid (3.6 mg, 9  $\mu$ mol, 35%) after purification by HPLC (acetonitrile:H<sub>2</sub>O 90:10 $\rightarrow$ 100:0 over 10 min, flow rate 1.0 mL/min at 295 K).

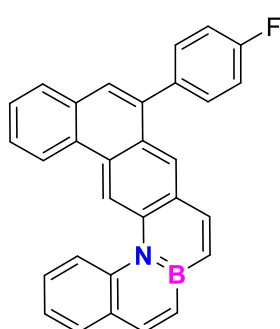

**<sup>1</sup>H NMR** (400 MHz, CDCl<sub>3</sub>)  $\delta$  = 9.93 (s, 1H), 8.78 (d,  $J$  = 8.6 Hz, 1H), 8.63 – 8.59 (m, 1H), 8.19 (s, 1H), 8.10 (d,  $J$  = 11.1 Hz, 1H), 8.02 (d,  $J$  = 11.2 Hz, 1H), 7.93 – 7.90 (m, 1H), 7.86 (dd,  $J$  = 7.8, 1.6 Hz, 1H), 7.69 – 7.59 (m, 5H), 7.56 (ddd,  $J$  = 8.6, 7.0, 1.7 Hz, 1H), 7.42 (ddd,  $J$  = 8.0, 7.2, 1.0 Hz, 1H), 7.30 – 7.21 (m, 4H) ppm.

**<sup>13</sup>C NMR** (101 MHz, CDCl<sub>3</sub>)  $\delta$  = 162.6 (d, <sup>1</sup>J<sub>C-F</sub> = 246.5 Hz, 1Cq), 144.0 (1CH), 143.3 (1CH), 139.5 (1Cq), 137.6 (1Cq), 137.3 (1Cq), 136.7 (d, <sup>4</sup>J<sub>Cq-F</sub> = 3.4 Hz, 1Cq), 132.2 (1Cq), 131.8 (d, <sup>3</sup>J<sub>C-F</sub> = 8.0 Hz, 2CH), 130.3 (1CH), 130.0 (1Cq), 129.8 (1Cq), 129.25 (1Cq), 129.19 (1Cq), 129.0 (1CH), 127.5 (1CH), 127.4 (1CH), 127.2 (1Cq), 127.08 (1CH), 127.07 (1CH), 127.05 (1CH), 123.1 (1CH), 122.8 (1CH), 120.5 (1CH), 115.6 (d, <sup>2</sup>J<sub>C-F</sub> = 21.3 Hz, 2CH), 114.9 (1CH) ppm. The carbon atoms bonded to boron were not observed.

**<sup>11</sup>B NMR** (161 MHz, CDCl<sub>3</sub>)  $\delta$  = 31.66 ppm.

$^{19}\text{F}$  NMR (282 MHz,  $\text{CDCl}_3$ )  $\delta = -114.83$  ppm.

IR (ATR)  $\tilde{\nu} = 3730, 3701, 3626, 3599, 3054, 3019, 2921, 2853, 1593, 1549, 1508, 1222, 901, 835, 817, 759, 747$   $\text{cm}^{-1}$ .

HRMS: calcd  $m/z$  for  $\text{C}_{30}\text{H}_{20}\text{BFN}$   $[\text{M}+\text{H}]^+$ : 424.1673; found (ESI) 424.1656

## 2.5. Post-modification reactions. Synthesis of **1b** and **13b**

### Bromination of helicene **1b**

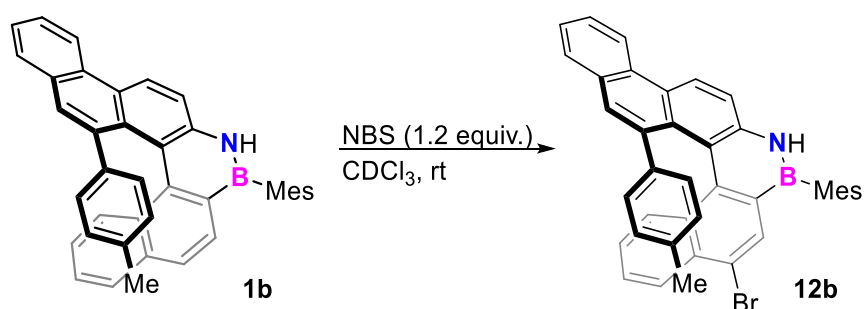

### *Scheme S6 Selective bromination of azabora[5]helicene towards compound **12b***

To a mixture of *rac*-**1b** (10.0 mg, 18  $\mu\text{mol}$ , 1.0 equiv.) in  $\text{CHCl}_3$  (2 mL), *N*-bromosuccinimide (3.95 mg, 22  $\mu\text{mol}$ , 1.2 equiv.) was added in one portion, and the resulting suspension was stirred at room temperature for 24 hours. Then, the reaction mixture was washed with  $\text{H}_2\text{O}$  ( $3 \times 2$  mL) and the organic phase dried over  $\text{Na}_2\text{SO}_4$ , filtered and concentrated under reduced pressure to afford the desired product *rac*-**12b** in 87% yield (10 mg, 16  $\mu\text{mol}$ ) as a white solid. Starting from (+)-**1b** (27 mg, 50  $\mu\text{mol}$ ), the product (+)-**12b** was obtained in 90% yield (28 mg, 45  $\mu\text{mol}$ ) without erosion of the enantiopurity (96% ee).

$^1\text{H}$  NMR (500 MHz,  $\text{CD}_2\text{Cl}_2$ ,  $-35$   $^\circ\text{C}$ )  $\delta = 8.88$  (d,  $J = 9.1$  Hz, 1H), 8.78 (d,  $J = 8.1$  Hz, 1H), 8.00 (d,  $J = 8.2$  Hz, 1H), 7.98 (br. s, 1H), 7.94 (dd,  $J = 8.0, 1.3$  Hz, 1H), 7.75 (ddd,  $J = 8.3, 7.0, 1.4$  Hz, 1H), 7.71 (s, 1H), 7.68 – 7.63 (m, 2H), 7.54 (s, 1H), 7.51 – 7.46 (m, 2H), 7.15 (ddd,  $J = 8.3, 6.9, 1.3$  Hz, 1H), 7.04 (s, 1H), 6.99 (s, 1H), 6.54 (d,  $J = 8.1$  Hz, 1H), 6.36 (dd,  $J = 7.8, 2.1$  Hz, 1H), 6.18 (dd,  $J = 7.9, 1.4$  Hz, 1H), 5.84 (dd,  $J = 7.9, 2.0$  Hz, 1H), 2.41 (s, 3H), 2.33 (s, 3H), 2.14 (s, 3H), 2.07 (s, 3H) ppm.

$^1\text{H}$  NMR (300 MHz,  $\text{CDCl}_3$ )  $\delta = 8.88$  (d,  $J = 9.0$  Hz, 1H), 8.76 (d,  $J = 8.1$  Hz, 1H), 8.03 (d,  $J = 7.9$  Hz, 1H), 7.97 – 7.89 (m, 2H), 7.77 – 7.59 (m, 4H), 7.56 – 7.43 (m, 3H), 7.14 (ddd,  $J = 8.3, 7.0, 1.2$  Hz, 1H), 7.02 (s, 1H), 6.97 (s, 1H), 6.23 (br. m, 4H), 2.41 (s, 3H), 2.33 (s, 3H), 2.14 (s, 3H), 2.08 (s, 3H) ppm.

$^{13}\text{C}$  NMR (126 MHz,  $\text{CD}_2\text{Cl}_2$ ,  $-35$   $^\circ\text{C}$ )  $\delta = 140.7$  (1Cq), 140.5 (1Cq), 139.6 (1Cq), 138.9 (1Cq), 138.5 (1Cq), 138.3 (1Cq), 138.1 (1Cq), 135.2 (br, 1Cq-B), 135.0 (1Cq), 132.1 (1CH), 131.8 (1Cq), 131.6 (1Cq), 131.5 (br, 1Cq-B), 131.1 (1Cq), 130.1 (1Cq), 129.83 (1CH), 129.82 (1Cq), 128.6 (1CH), 127.6 (1CH), 127.34 (1CH), 127.28 (1CH), 127.22 (1CH), 127.20 (1CH), 126.9 (1CH), 126.82 (1CH), 126.79 (1CH), 126.74 (1CH), 126.71 (1Cq), 126.2 (1CH), 125.9 (1CH),

125.7 (1CH), 123.5 (1CH), 122.6 (1CH), 121.1 (1Cq), 118.5 (1CH), 116.6 (1Cq), 23.1 (1CH<sub>3</sub>), 23.0 (1CH<sub>3</sub>), 21.5 (1CH<sub>3</sub>), 21.1 (1CH<sub>3</sub>) ppm.

<sup>11</sup>B NMR (161 MHz, CDCl<sub>3</sub>)  $\delta$  = 39.71 ppm.

IR (ATR)  $\tilde{\nu}$  = 3367, 2909, 2850, 1568, 1546, 1496, 1448, 1410, 1315, 1237, 1045, 904, 814, 724 cm<sup>-1</sup>.

HRMS: calcd  $m/z$  for C<sub>40</sub>H<sub>31</sub>BBrN [M]<sup>+</sup>: 615.1734; found (ESI) 615.1747

M. p. = 173 °C

#### Ring opening of **1b** to **13b**

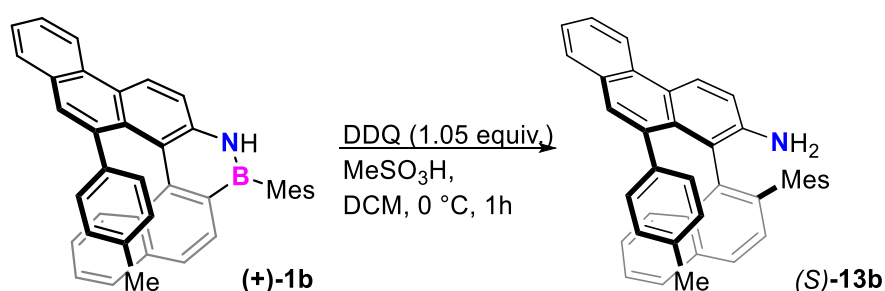

**Scheme S7** Synthesis of axially chiral aniline (*R*)-**13b**

To a solution of helicene (+)-**1b** (10 mg, 18.6  $\mu$ mol) in dry CH<sub>2</sub>Cl<sub>2</sub> (2 mL), under argon at 0 °C, MeSO<sub>3</sub>H (0.1 mL) and DDQ (4.5 mg, 19.8  $\mu$ mol, 1.05 equiv.) were added. The resulting mixture was stirred for 1 hour at the same temperature. Then, it was quenched with an aqueous solution of NaHCO<sub>3</sub>, and extracted with CH<sub>2</sub>Cl<sub>2</sub> (3  $\times$  2 mL). The combined organic phases were washed with H<sub>2</sub>O and brine, dried over Na<sub>2</sub>SO<sub>4</sub>, and concentrated under reduced pressure. The crude product was purified by Silica gel column chromatography (hexane/toluene 3:1) yielding the product (*S*)-**13b** (7 mg, 13.0  $\mu$ mol, 71%) as a white solid without erosion of the enantiopurity (96% ee).

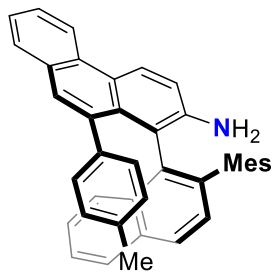

<sup>1</sup>H NMR (500 MHz, CDCl<sub>3</sub>, -35 °C)  $\delta$  = 8.51 (d,  $J$  = 8.4 Hz, 1H), 8.46 (d,  $J$  = 9.2 Hz, 1H), 7.69 – 7.65 (m, 2H), 7.60 – 7.56 (m, 3H), 7.47 (ddd,  $J$  = 7.8, 7.1, 0.9 Hz, 1H), 7.35 (ddd,  $J$  = 8.0, 6.7, 1.2 Hz, 1H), 7.30 – 7.26 (m, 1H), 7.21 (s, 1H), 7.15 (d,  $J$  = 8.4 Hz, 1H), 6.97 (d,  $J$  = 8.8 Hz, 1H), 6.83 (d,  $J$  = 7.4 Hz, 1H), 6.58 (s, 1H), 6.48 (d,  $J$  = 7.6 Hz, 1H), 6.36 (d,  $J$  = 7.4 Hz, 1H), 6.28 (s, 1H), 5.99 (d,  $J$  = 7.5 Hz, 1H), 3.56 (s, 2H), 2.00 (s, 3H), 1.99 (s, 3H), 1.86 (s, 3H), 1.58 (s, 3H) ppm.

<sup>1</sup>H NMR (400 MHz, CDCl<sub>3</sub>)  $\delta$  = 8.47 (d,  $J$  = 8.1 Hz, 1H), 8.42 (d,  $J$  = 9.1 Hz, 1H), 7.71 (d,  $J$  = 8.1 Hz, 1H), 7.66 (dd,  $J$  = 8.0, 1.2 Hz, 1H), 7.61 – 7.52 (m, 3H), 7.44 (ddd,  $J$  = 7.8, 7.1, 1.1 Hz, 1H), 7.34 (ddd,  $J$  = 8.2, 6.8, 1.4 Hz, 1H), 7.31 – 7.26 (m, 1H), 7.20 (s, 1H), 7.16 (d,  $J$  = 8.4 Hz, 1H), 6.94 (d,  $J$  = 8.9 Hz, 1H), 6.64 (br. s, 2H), 6.51 (s, 1H), 6.41 – 6.07 (m, 3H), 3.55 (s, 2H), 1.98 (s, 3H), 1.96 (s, 3H), 1.92 (s, 3H), 1.58 (s, 3H) ppm.

<sup>13</sup>C NMR (126 MHz, CDCl<sub>3</sub>, -35 °C)  $\delta$  = 143.8 (1Cq), 139.7 (1Cq), 138.9 (1Cq), 138.1 (1Cq), 136.9 (1Cq), 136.5 (1Cq), 135.7 (1Cq), 135.6 (1Cq), 135.4 (1Cq), 133.9 (1Cq), 133.5 (1Cq),

133.1 (1Cq), 131.7 (1Cq), 130.9 (1CH), 130.1 (1Cq), 130.0 (1CH), 129.3 (1CH), 129.2 (1Cq), 128.0 (1CH), 127.9 (1CH), 127.52 (1CH), 127.48 (1CH), 127.4 (1CH), 127.3 (1CH), 126.5 (1CH), 126.4 (1CH), 126.2 (1CH), 125.4 (1CH), 125.2 (1CH), 125.1 (1CH), 125.0 (1CH), 124.1 (1Cq), 123.7 (1CH), 121.8 (1CH), 118.0 (1Cq), 116.3 (1CH), 22.4 (1CH<sub>3</sub>), 21.1 (1CH<sub>3</sub>), 21.0 (1CH<sub>3</sub>), 20.8 (1CH<sub>3</sub>) ppm.

**IR (ATR)**  $\tilde{\nu}$  = 3385, 2920, 1609, 1456, 1377, 1276, 1260, 906, 811, 748 cm<sup>-1</sup>.

**HRMS:** calcd  $m/z$  for C<sub>40</sub>H<sub>33</sub>NNa [M+Na]<sup>+</sup>: 550.2505; found (ESI) 550.2505

**M. p.** = 131 °C

### 3. NMR-Spectra

#### $^1\text{H}$ NMR (300 MHz, $\text{CDCl}_3$ ) 3

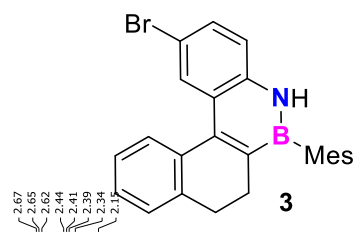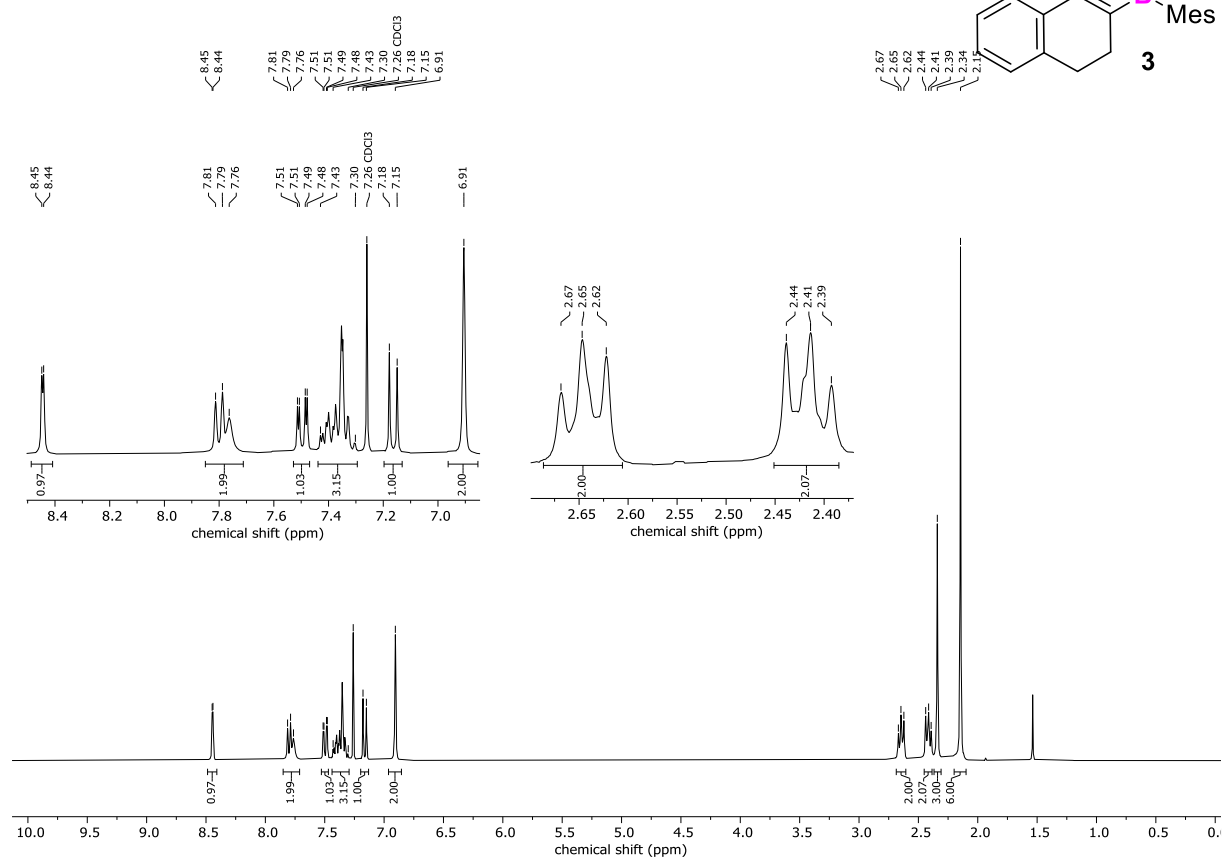

#### $^{13}\text{C}$ NMR (101 MHz, $\text{CDCl}_3$ )

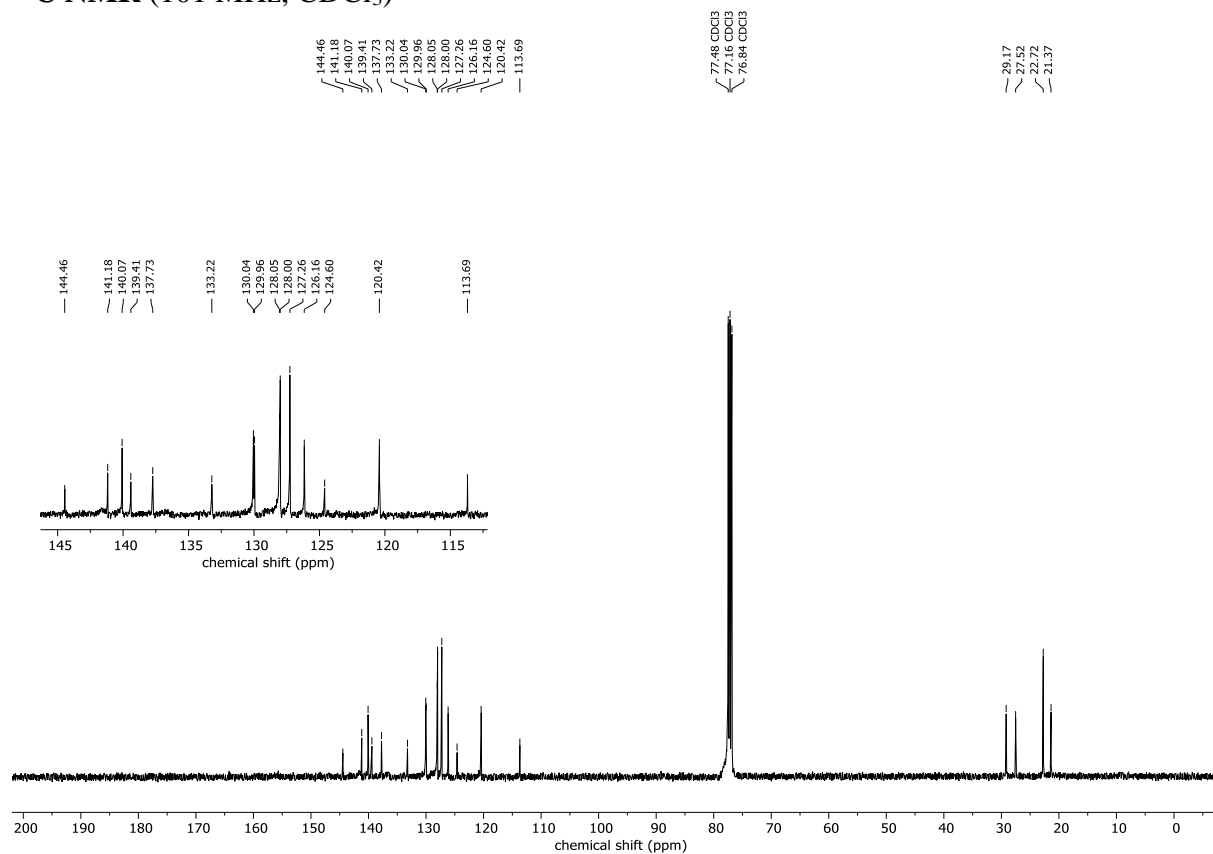

**$^{11}\text{B}$  NMR (161 MHz,  $\text{CDCl}_3$ )**

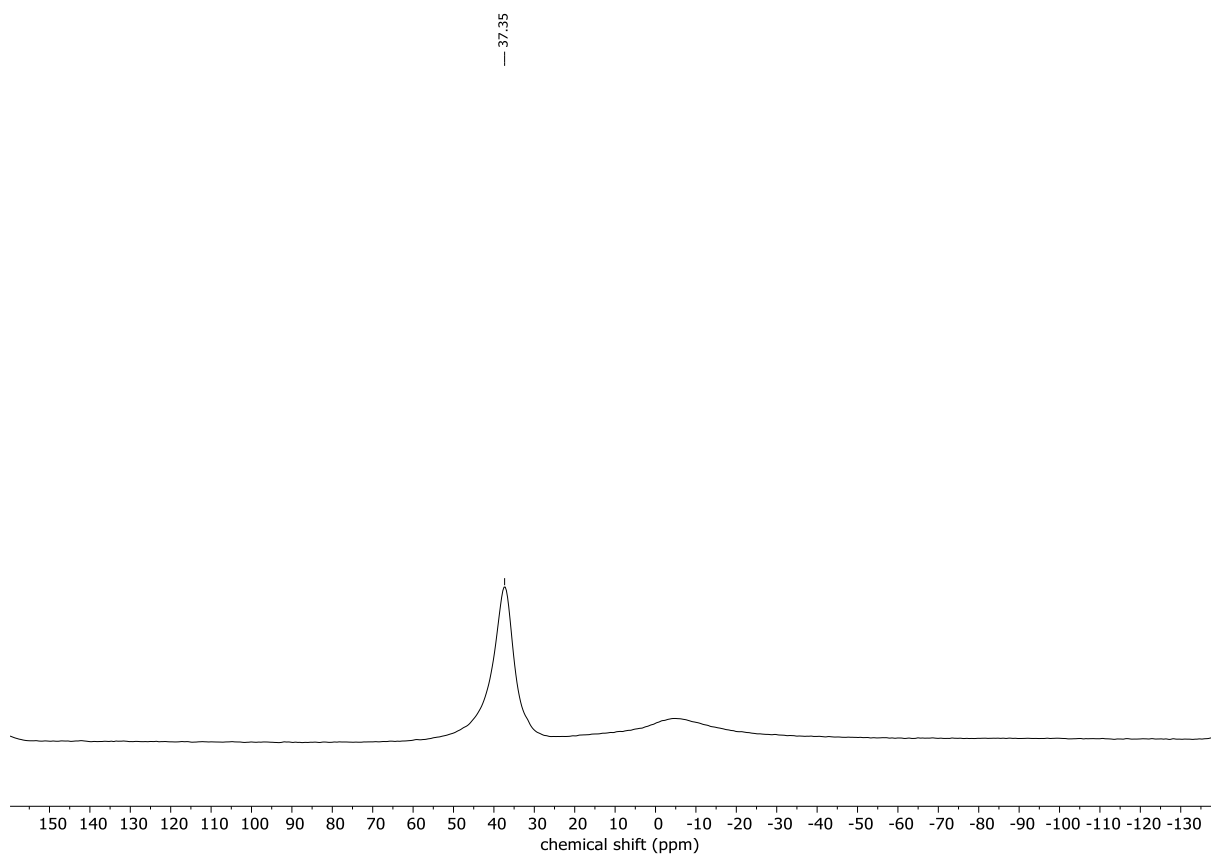

# $^1\text{H}$ NMR (300 MHz, $\text{CDCl}_3$ ) S3(BPh)

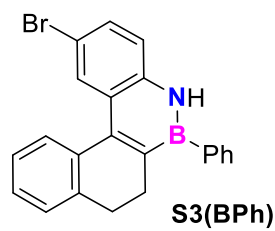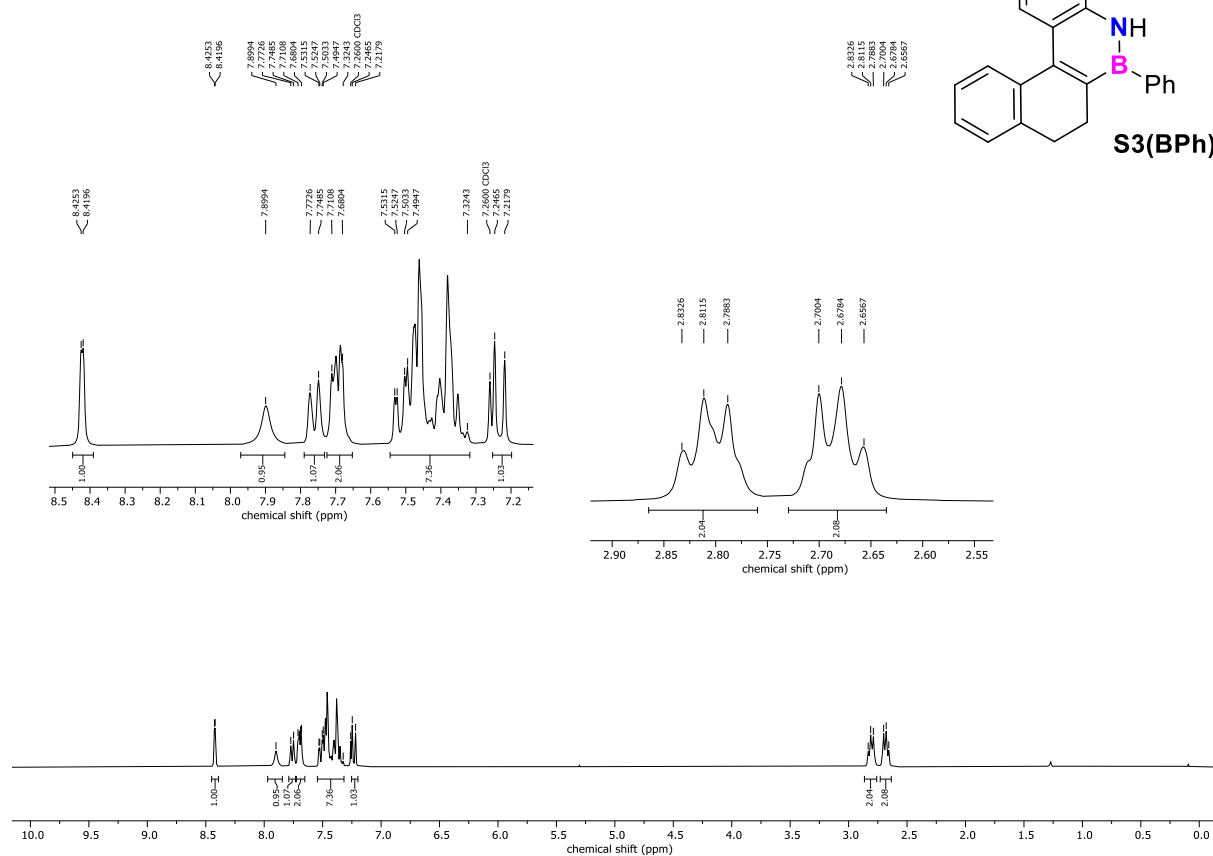

# $^{13}\text{C}$ NMR (101 MHz, $\text{CDCl}_3$ )

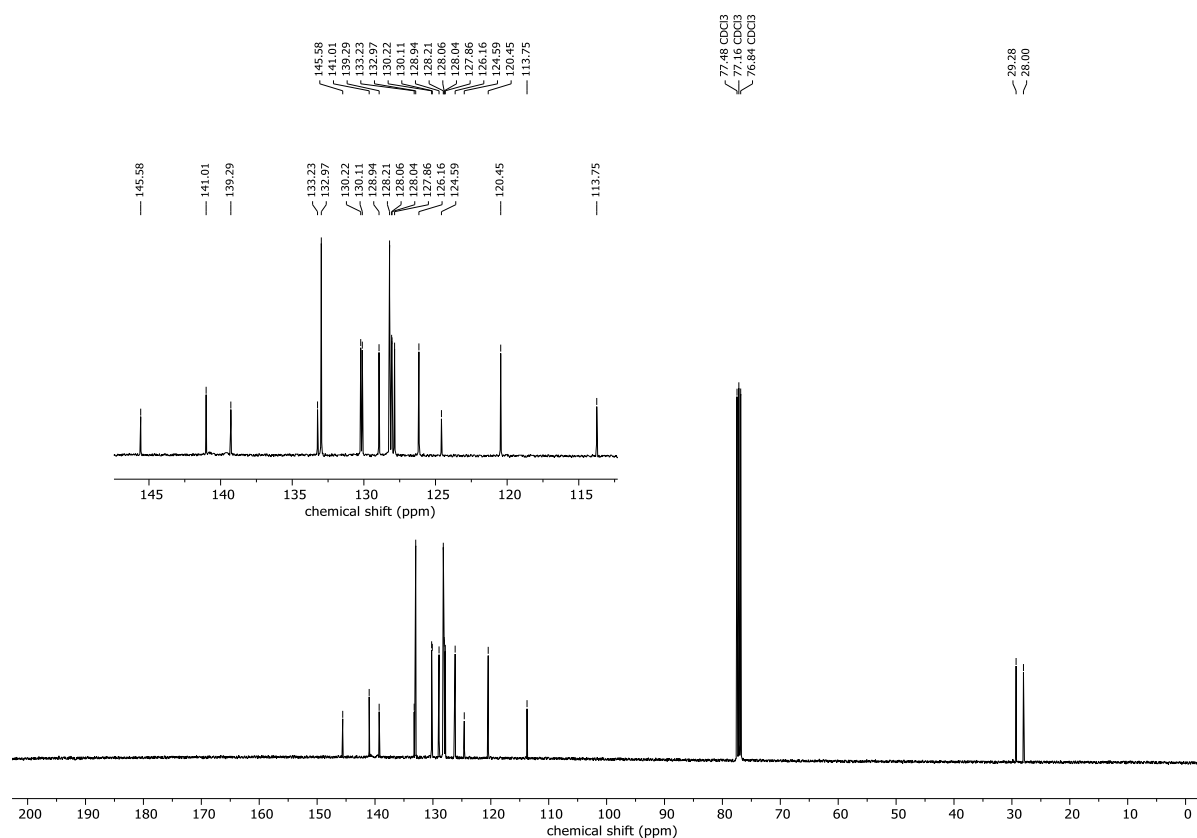

**$^{11}\text{B}$  NMR (128 MHz,  $\text{CDCl}_3$ )**

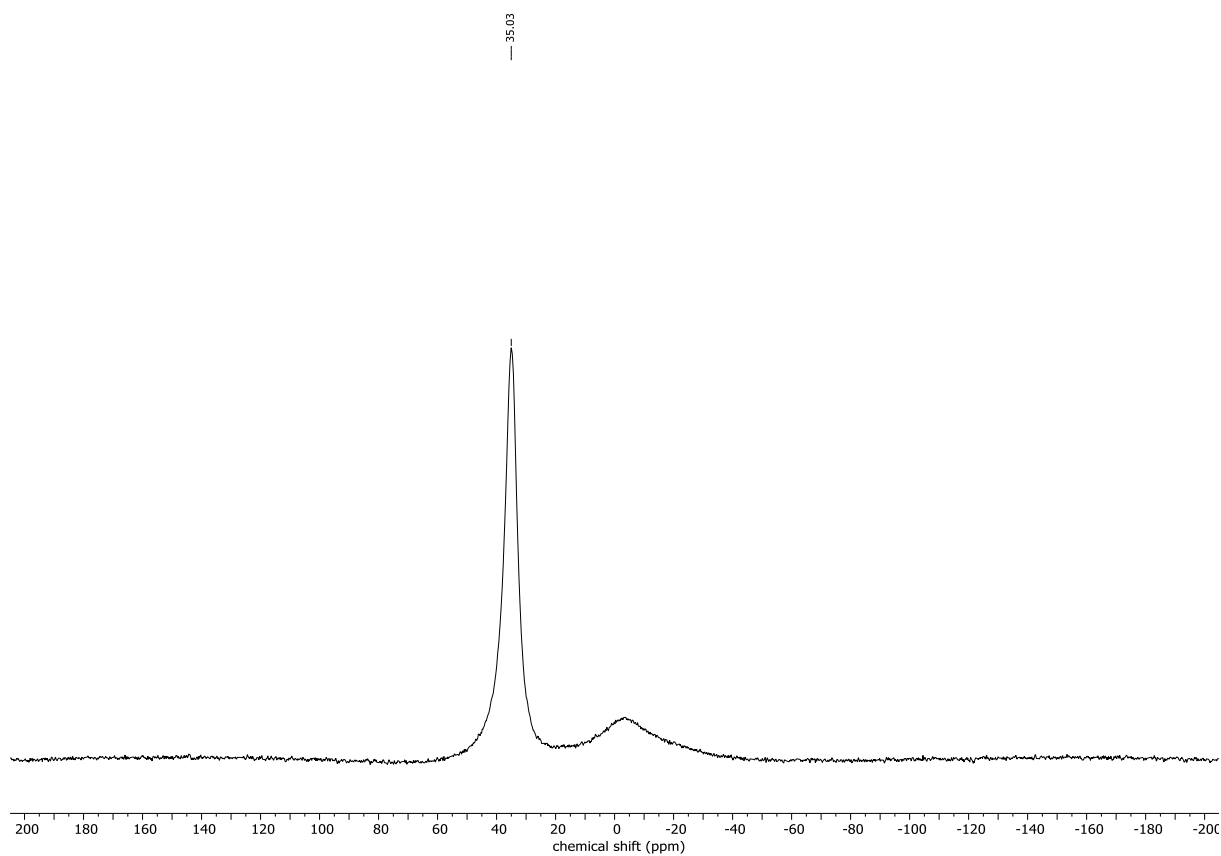

# <sup>1</sup>H NMR (300 MHz, CD<sub>2</sub>Cl<sub>2</sub>) 4

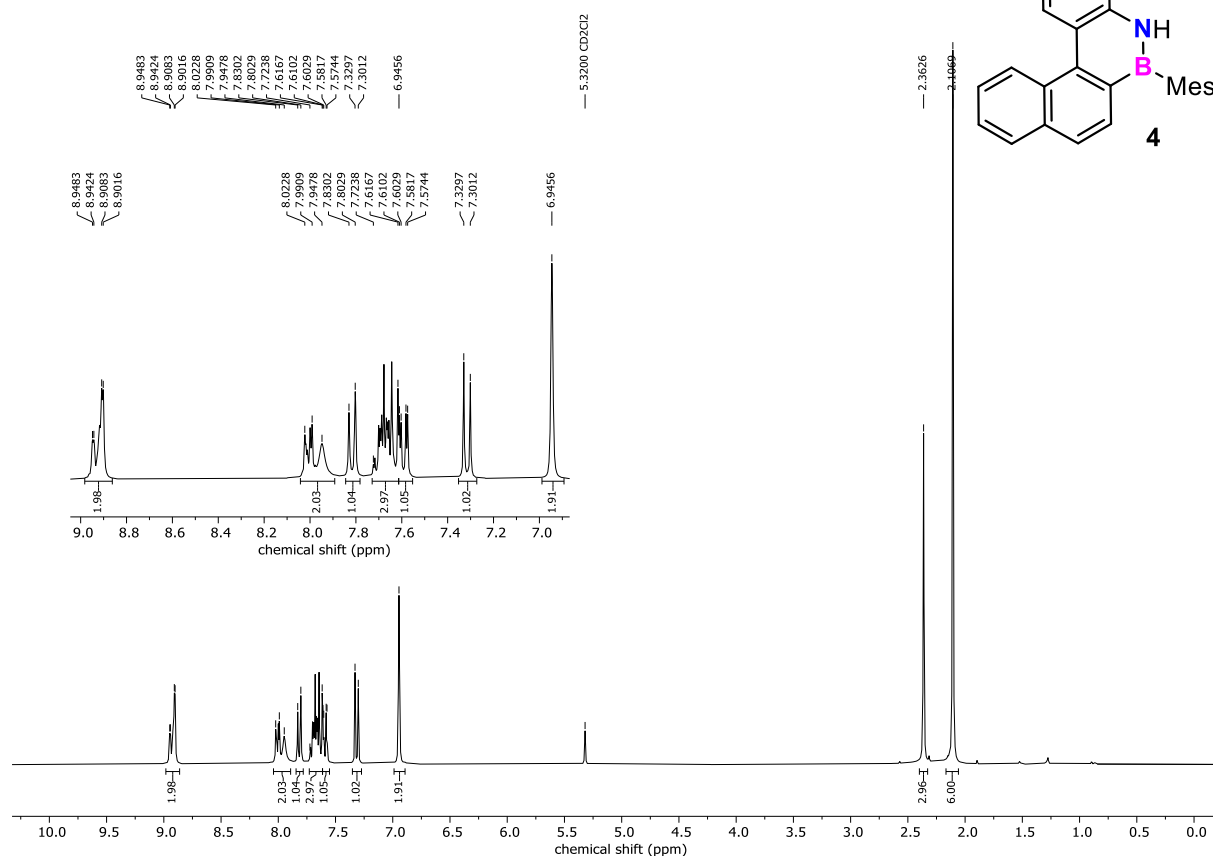

# <sup>13</sup>C NMR (101 MHz, CDCl<sub>3</sub>)

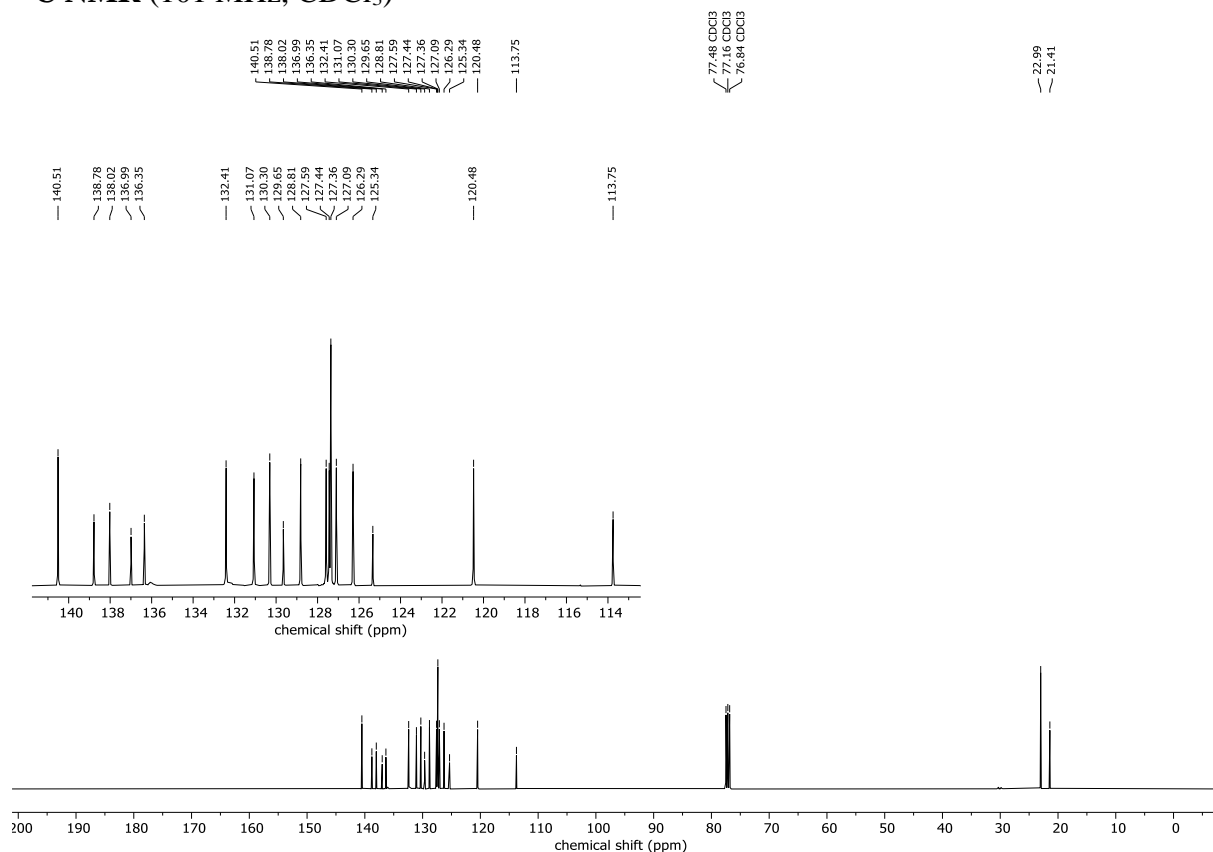

**$^{11}\text{B}$  NMR** (161 MHz,  $\text{CD}_2\text{Cl}_2$ )

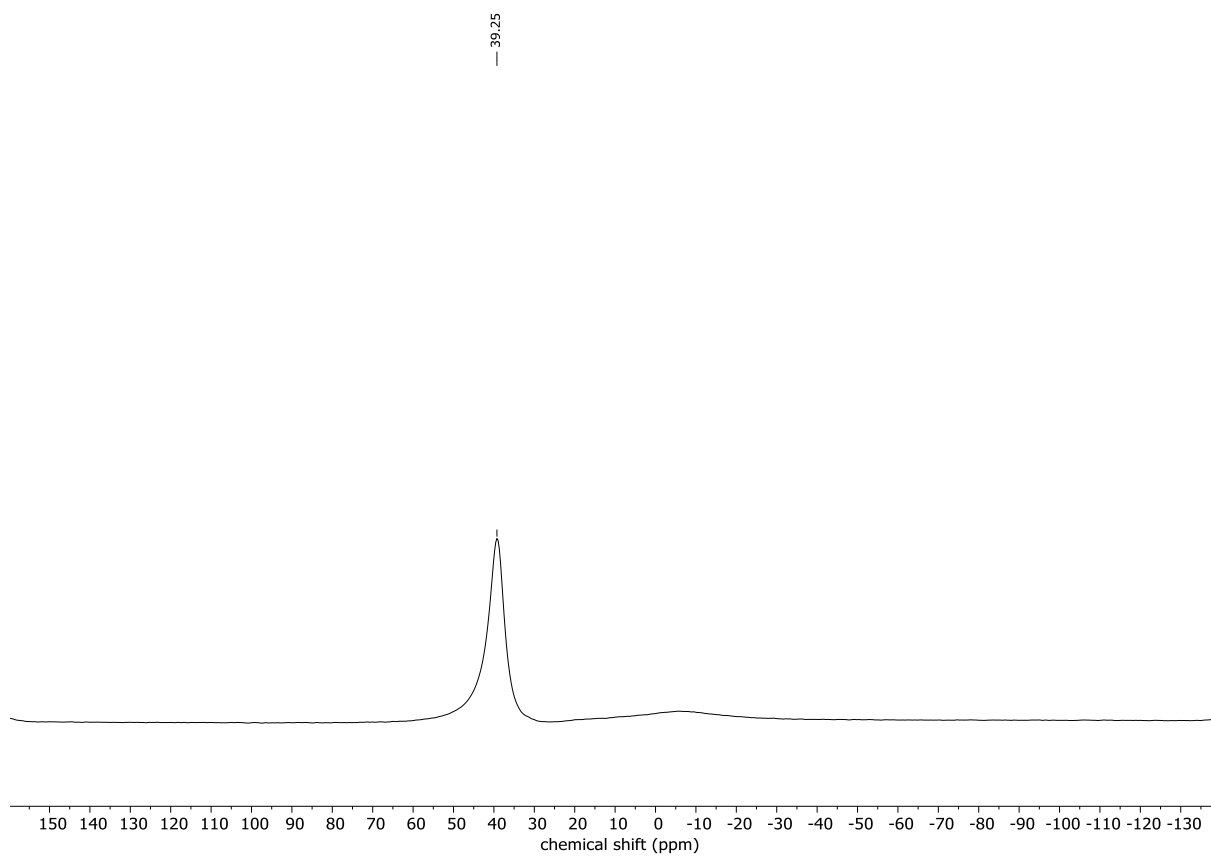

# <sup>1</sup>H NMR (400 MHz, CDCl<sub>3</sub>) S4(BPh)

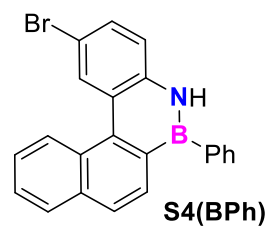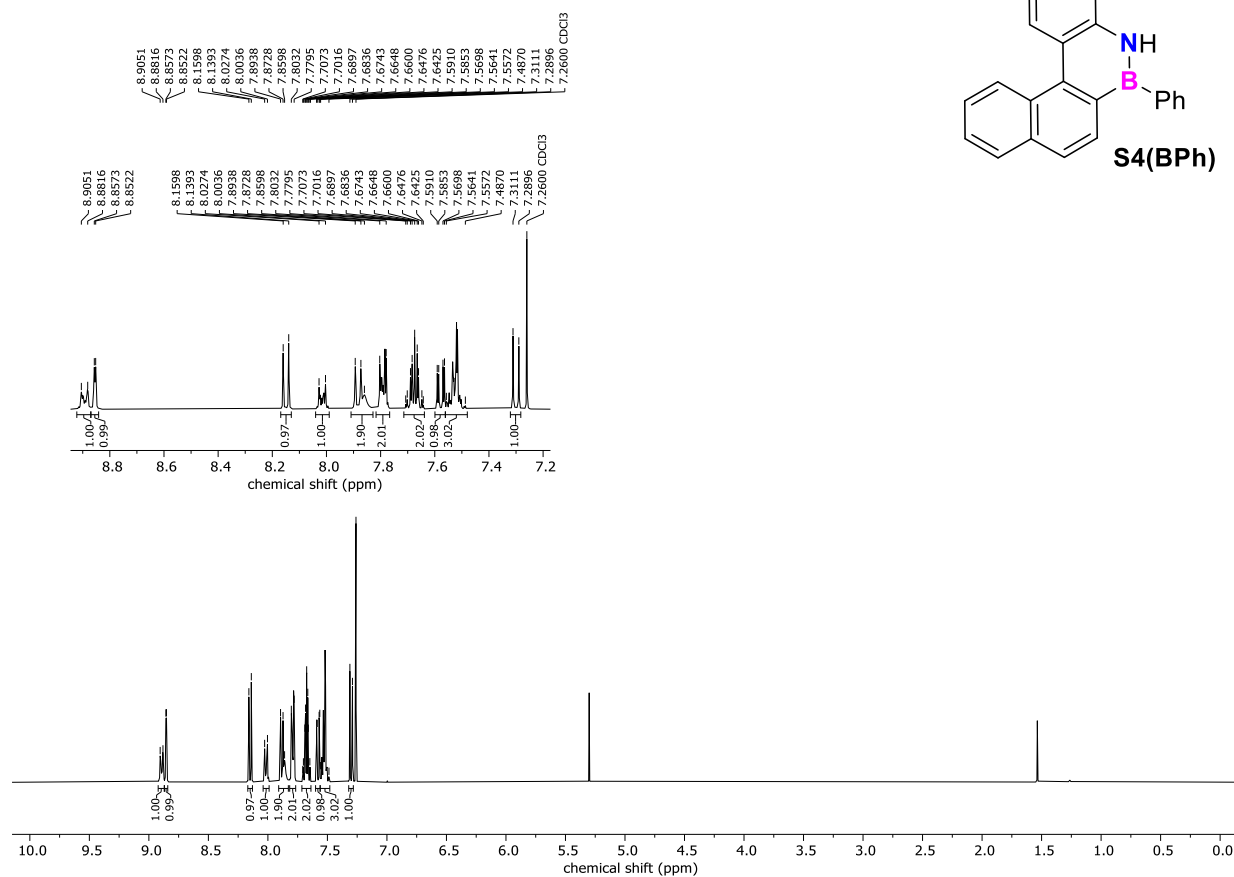

# <sup>13</sup>C NMR (101 MHz, CDCl<sub>3</sub>)

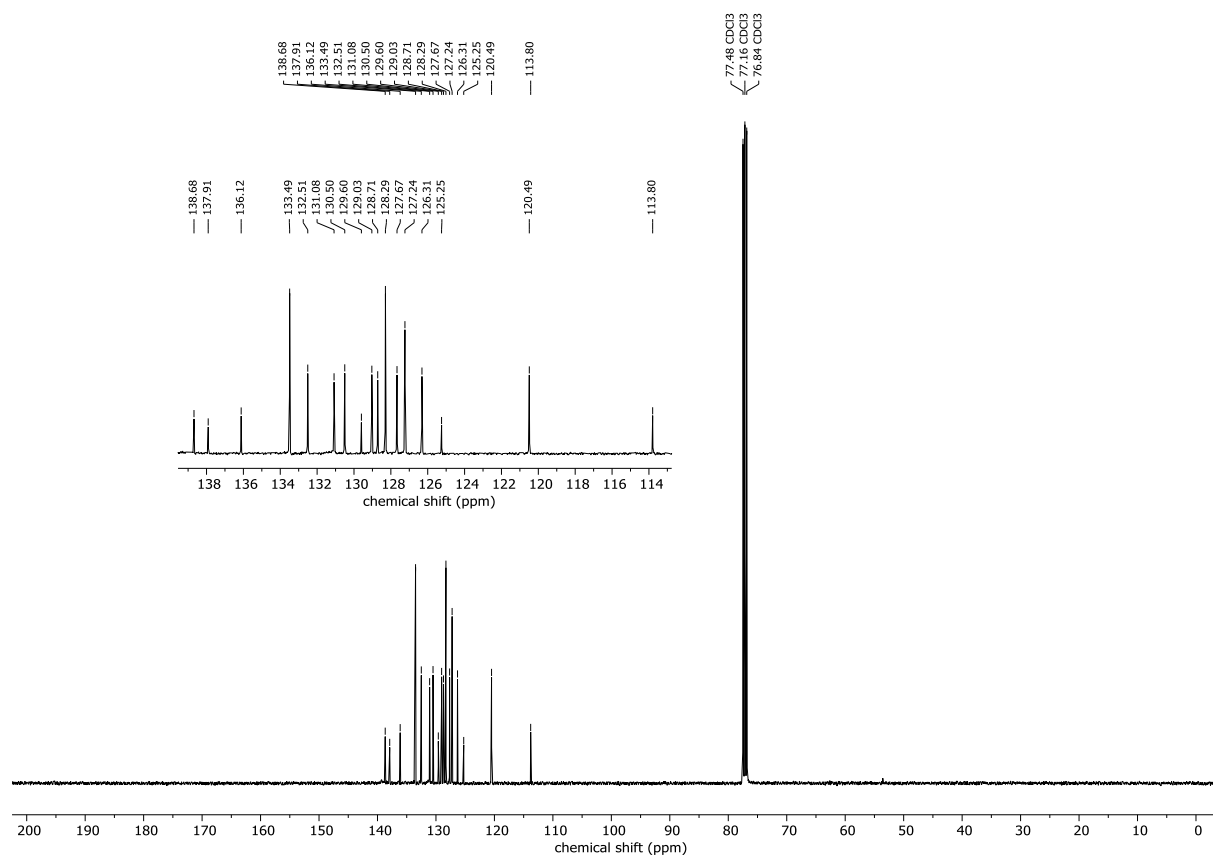

**$^{11}\text{B}$  NMR (128 MHz,  $\text{CDCl}_3$ )**

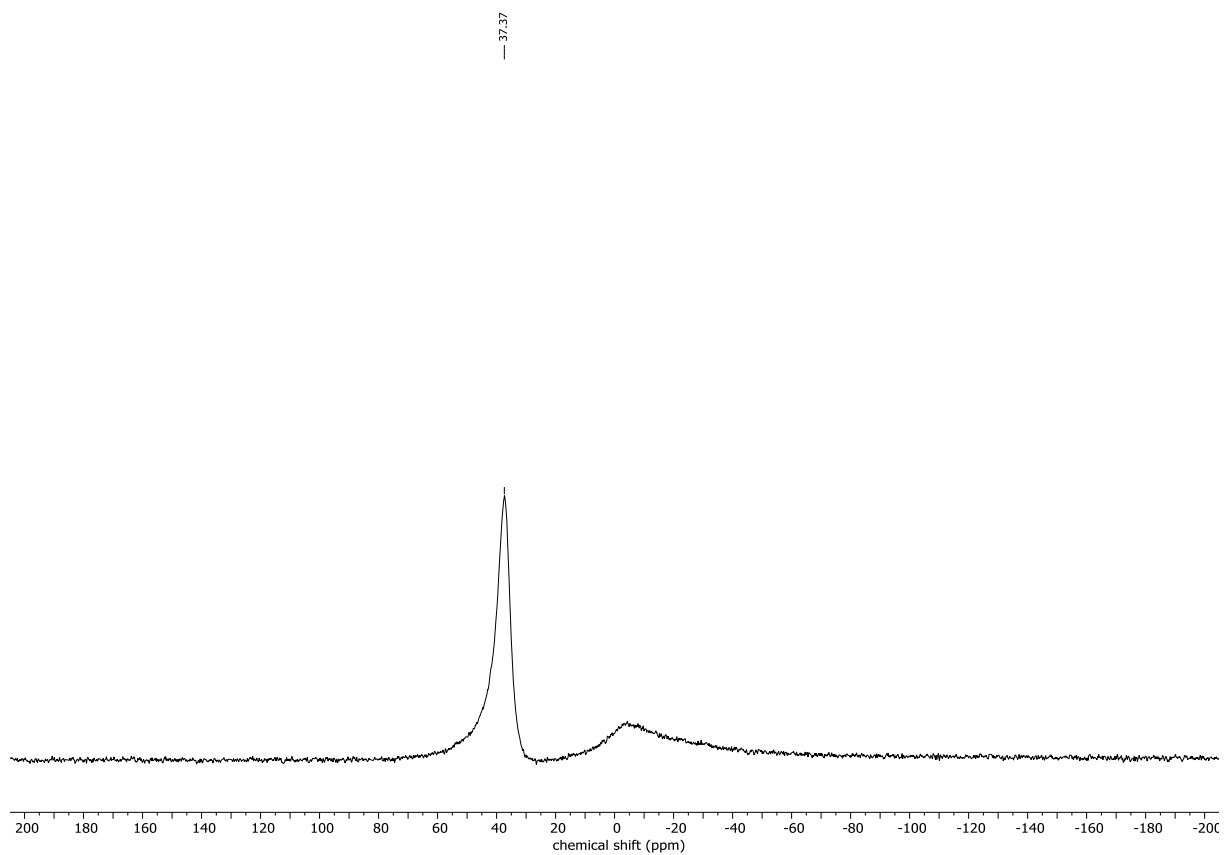

# <sup>1</sup>H NMR (300 MHz, CDCl<sub>3</sub>) S4(NMe)

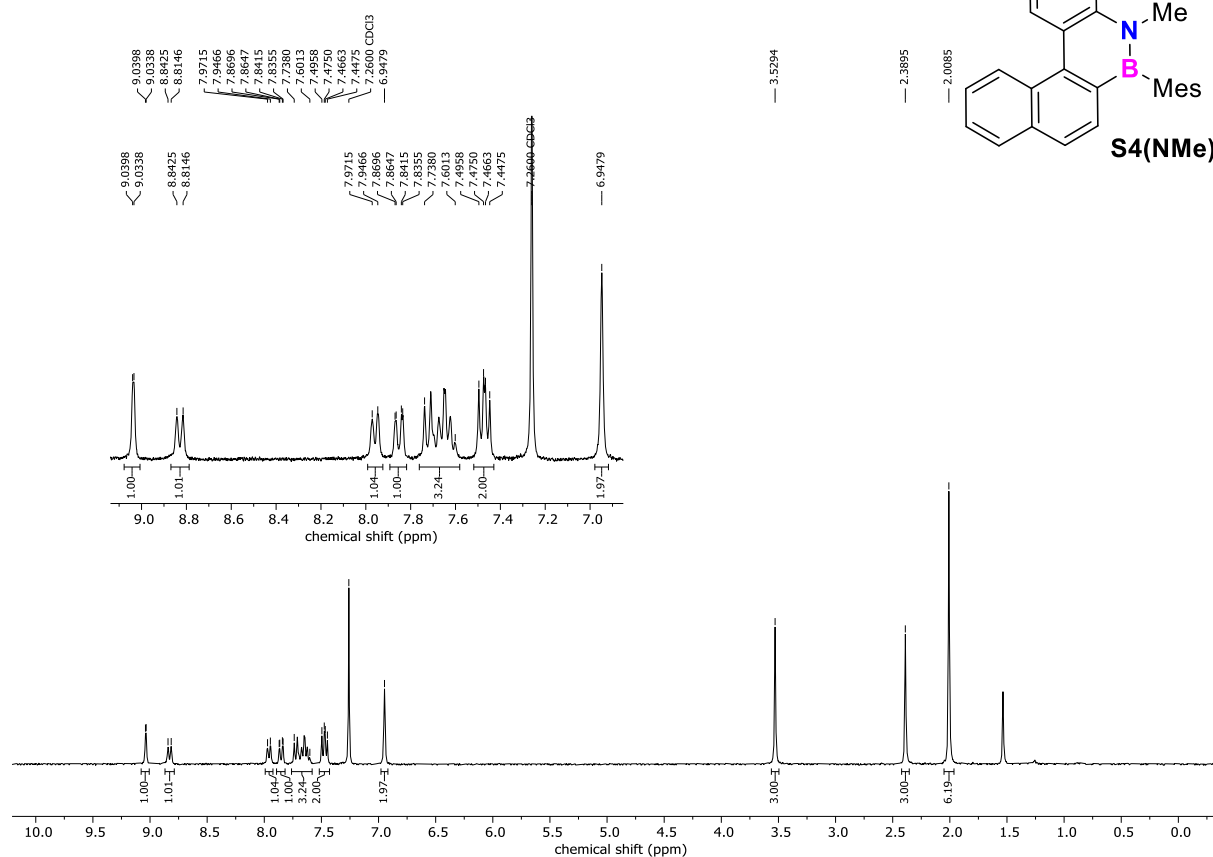

# <sup>13</sup>C NMR (101 MHz, CDCl<sub>3</sub>)

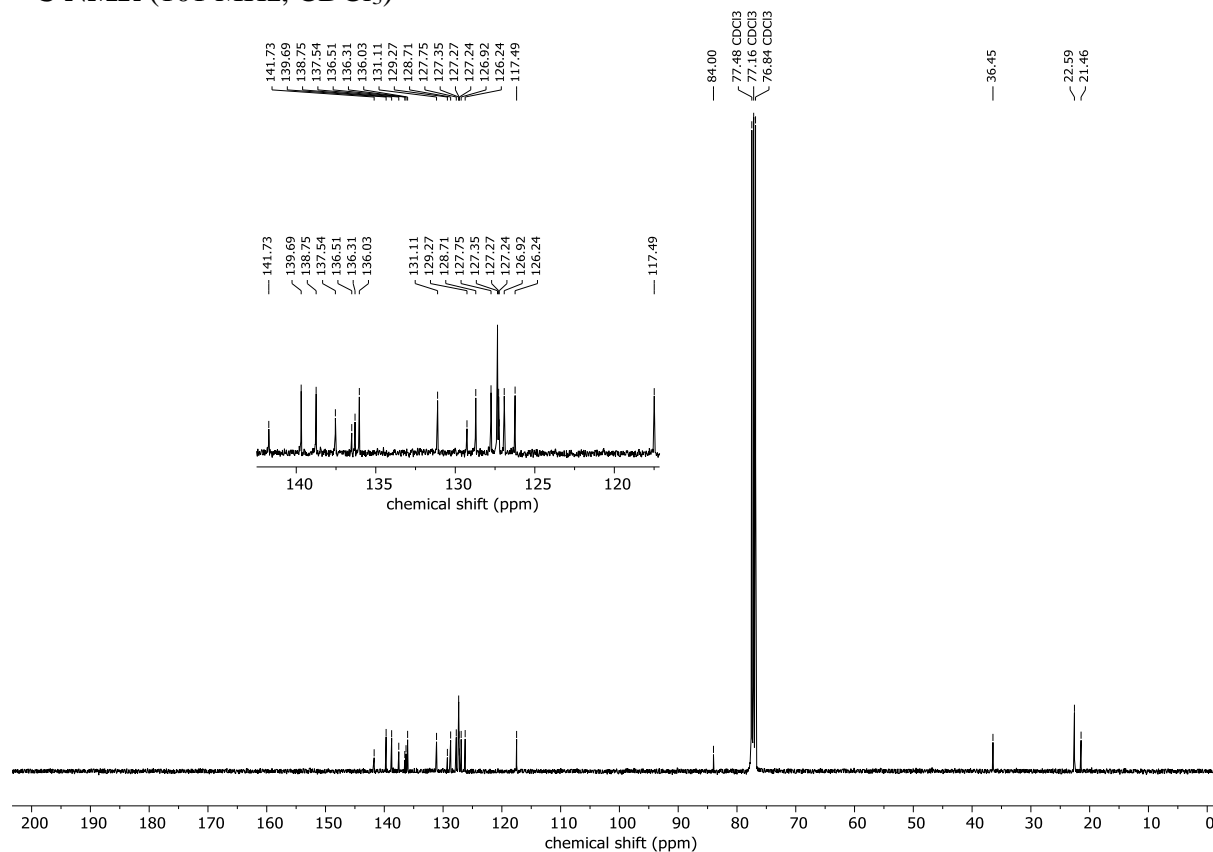

**$^{11}\text{B}$  NMR (161 MHz,  $\text{CDCl}_3$ )**

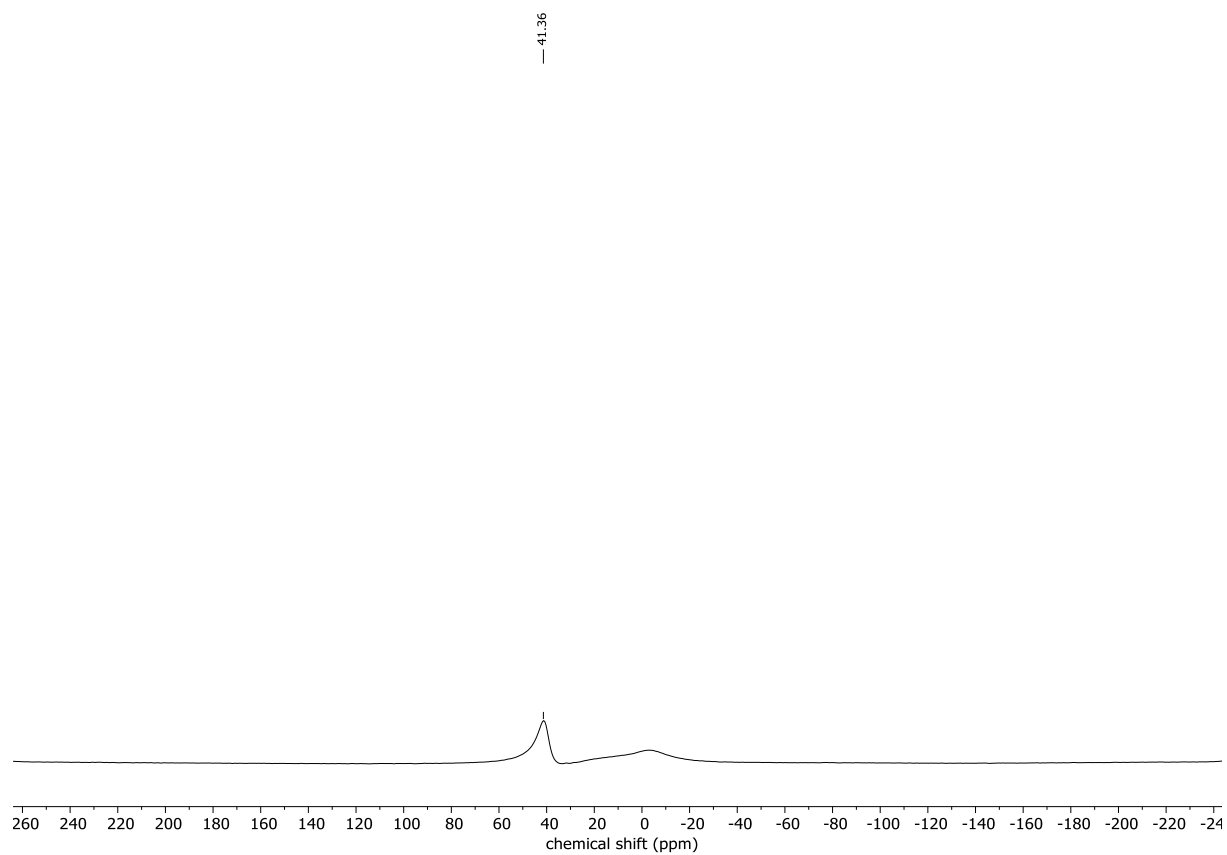

# <sup>1</sup>H-NMR (400 MHz, CDCl<sub>3</sub>) S9

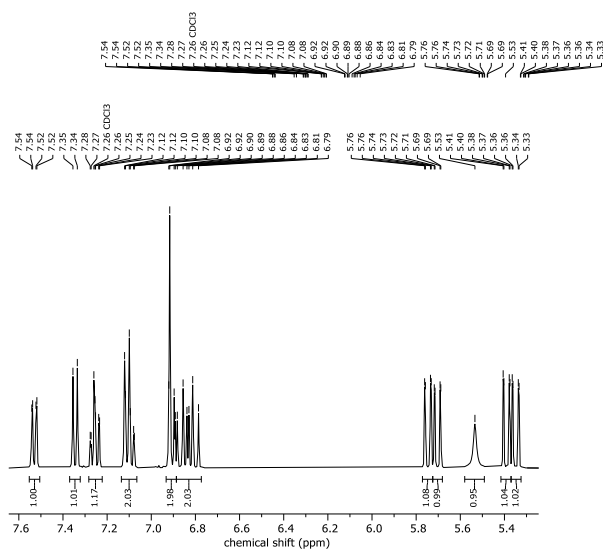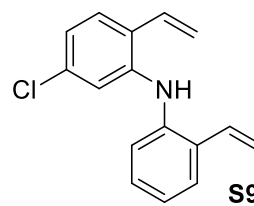

# <sup>13</sup>C-NMR (101 MHz, CDCl<sub>3</sub>)

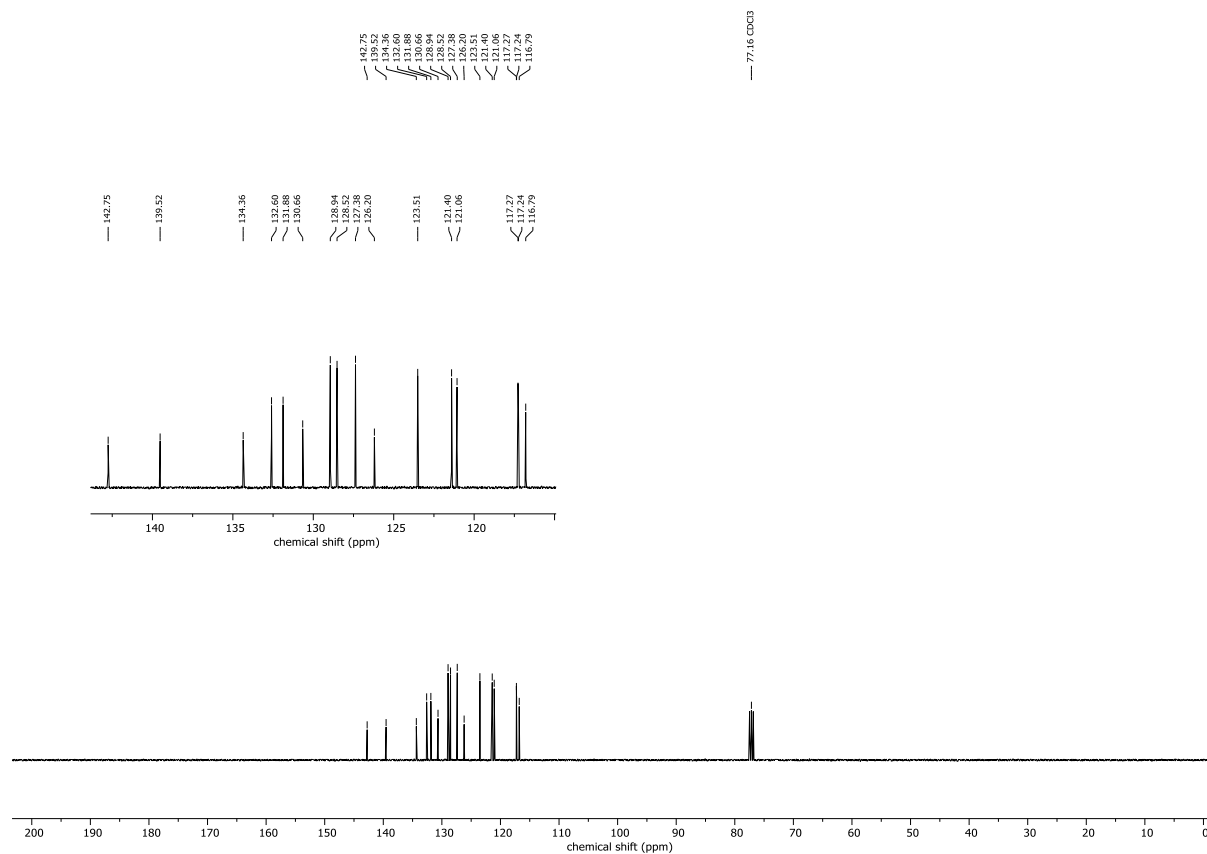

# <sup>1</sup>H-NMR (400 MHz, CDCl<sub>3</sub>) S12 and S13

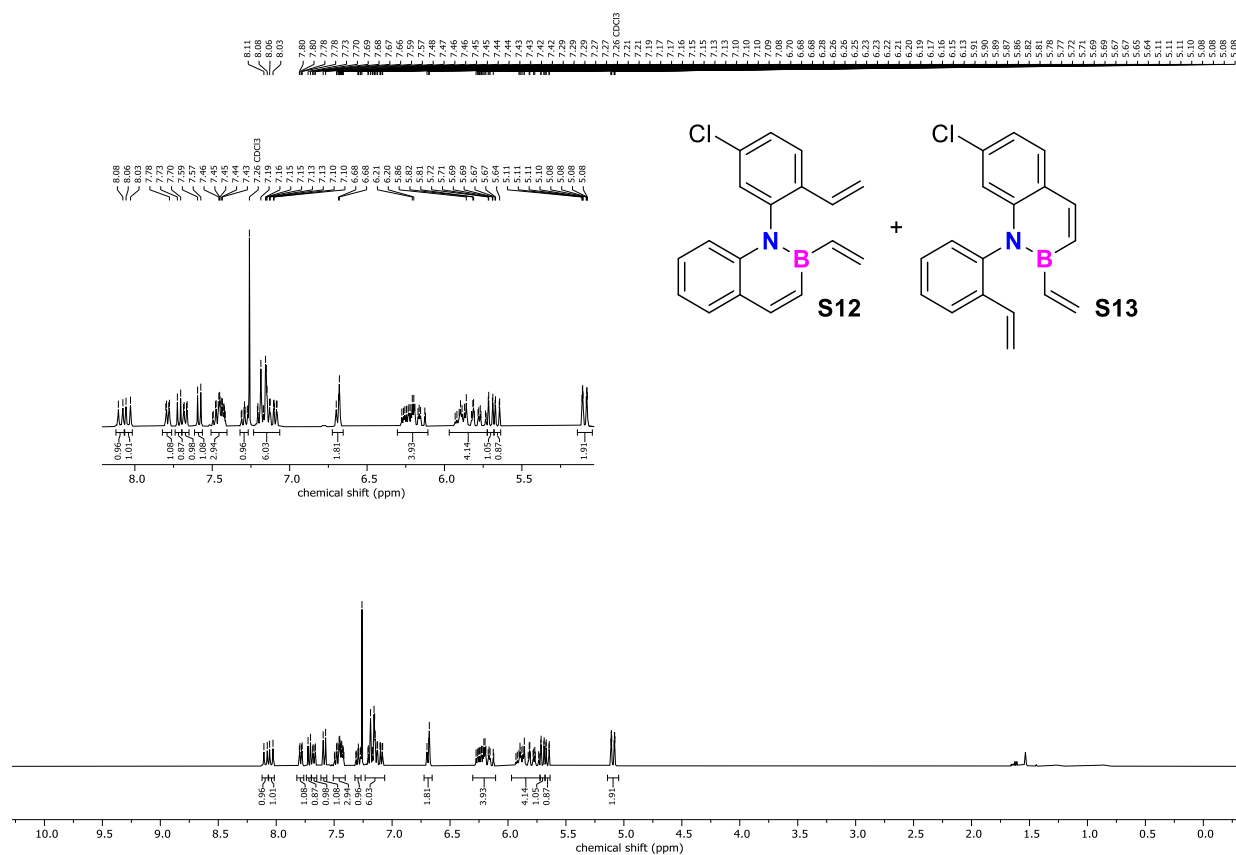

# <sup>13</sup>C-NMR (101 MHz, CDCl<sub>3</sub>)

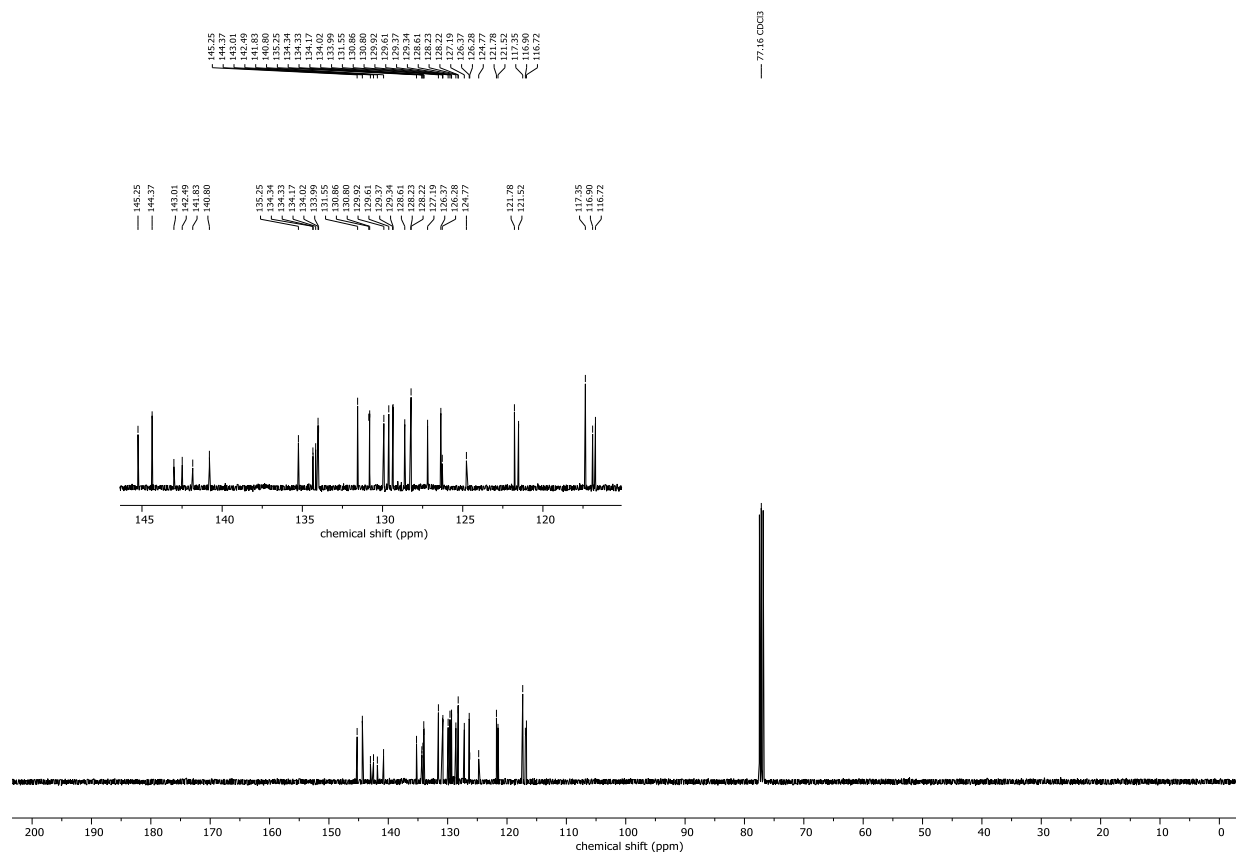

**$^{11}\text{B}$ -NMR (128 MHz,  $\text{CDCl}_3$ )**

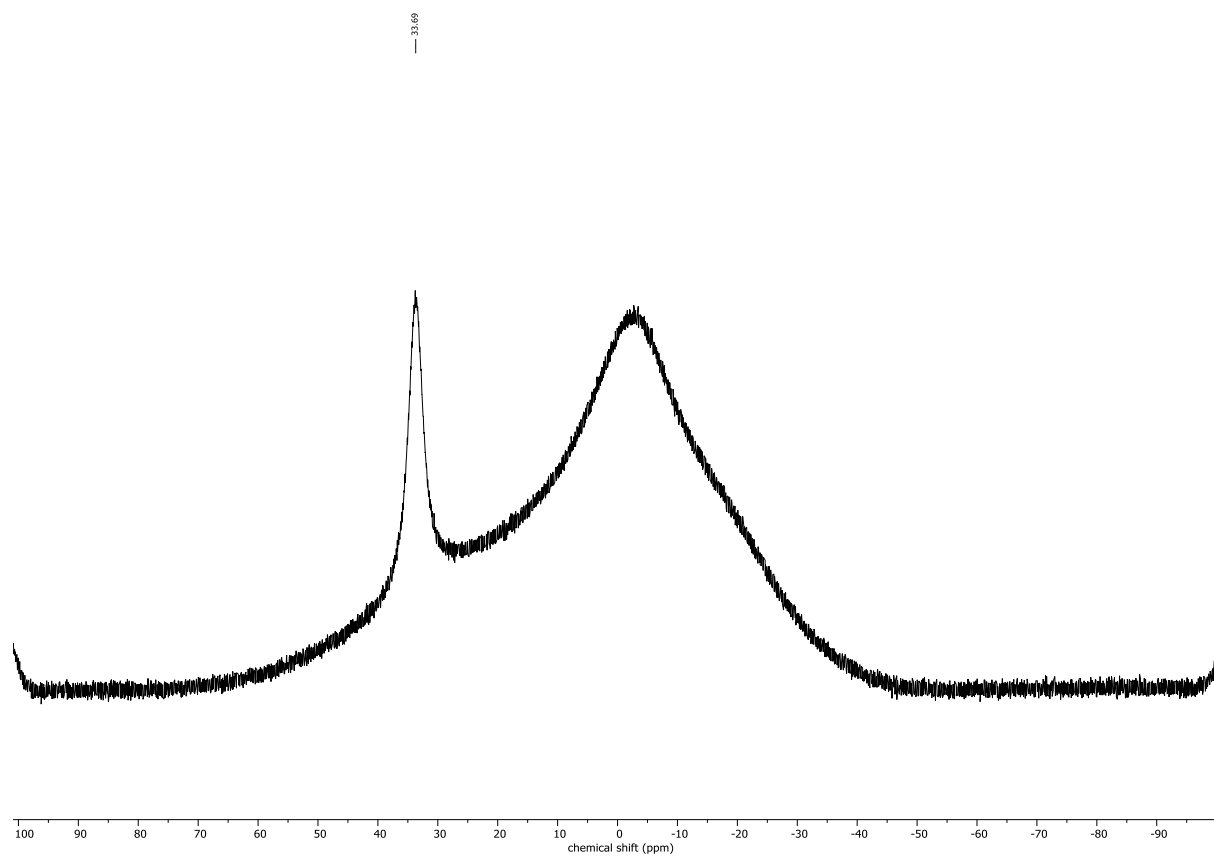

# <sup>1</sup>H-NMR (400 MHz, CDCl<sub>3</sub>) 6

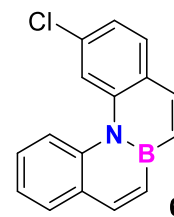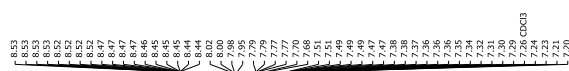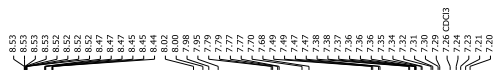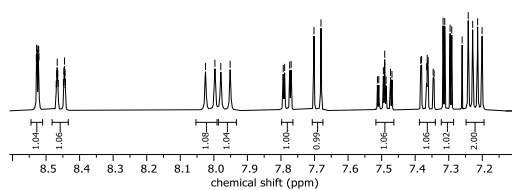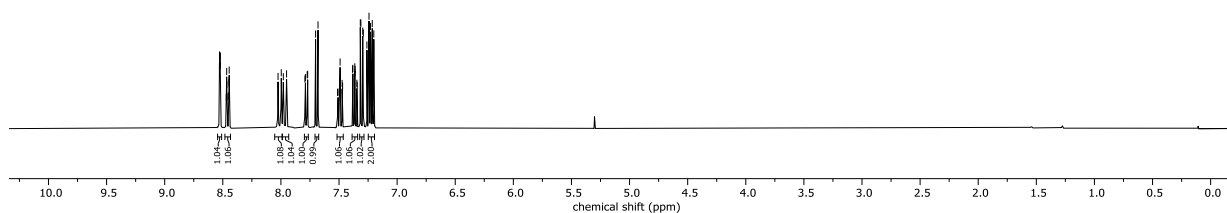

# <sup>13</sup>C-NMR (101 MHz, CDCl<sub>3</sub>)

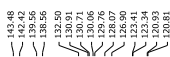

77.16 CDCl<sub>3</sub>

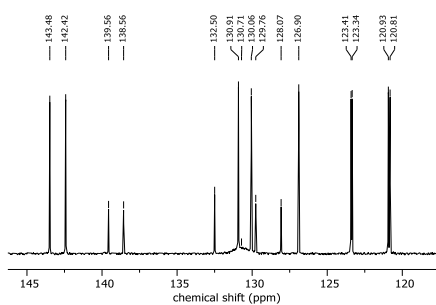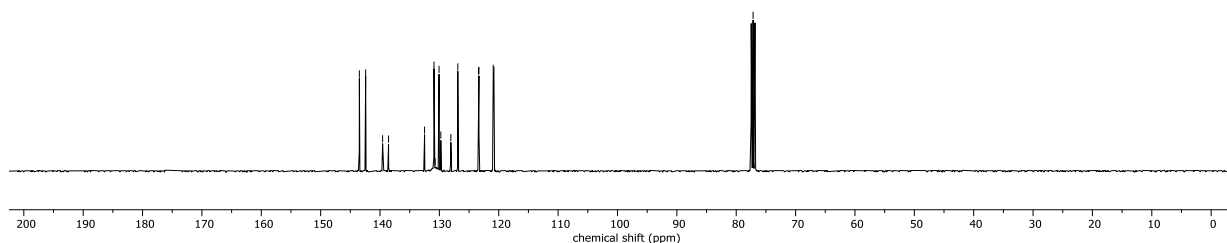

**$^{11}\text{B}$ -NMR (128 MHz,  $\text{CDCl}_3$ )**

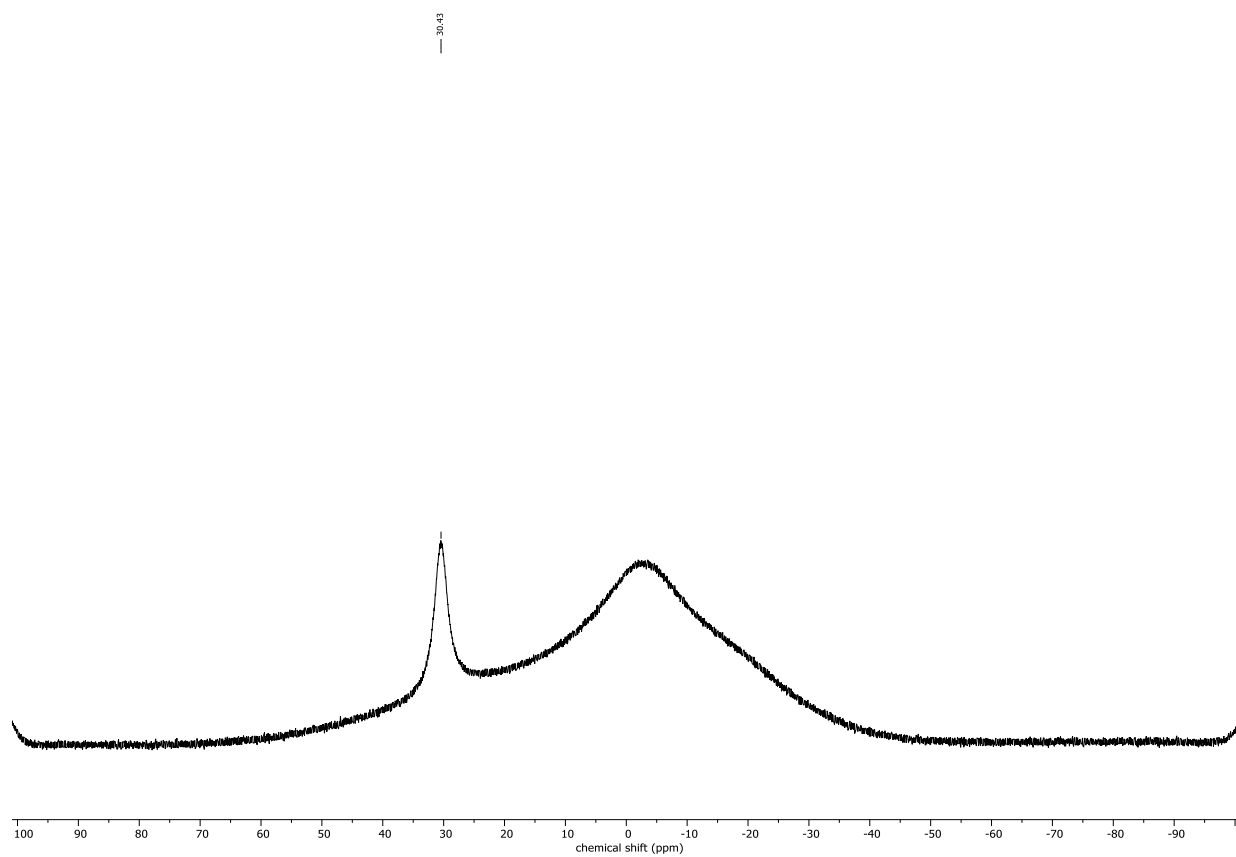

# <sup>1</sup>H NMR (400 MHz, CD<sub>2</sub>Cl<sub>2</sub>) 5a

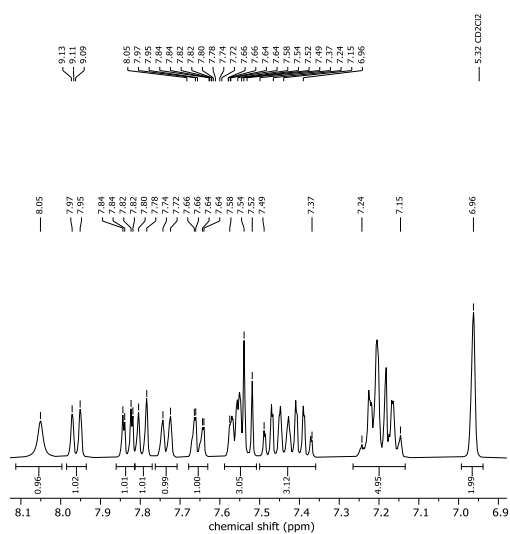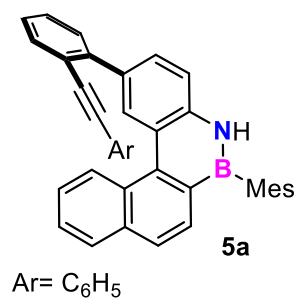

# <sup>13</sup>C NMR (101 MHz, CD<sub>2</sub>Cl<sub>2</sub>)

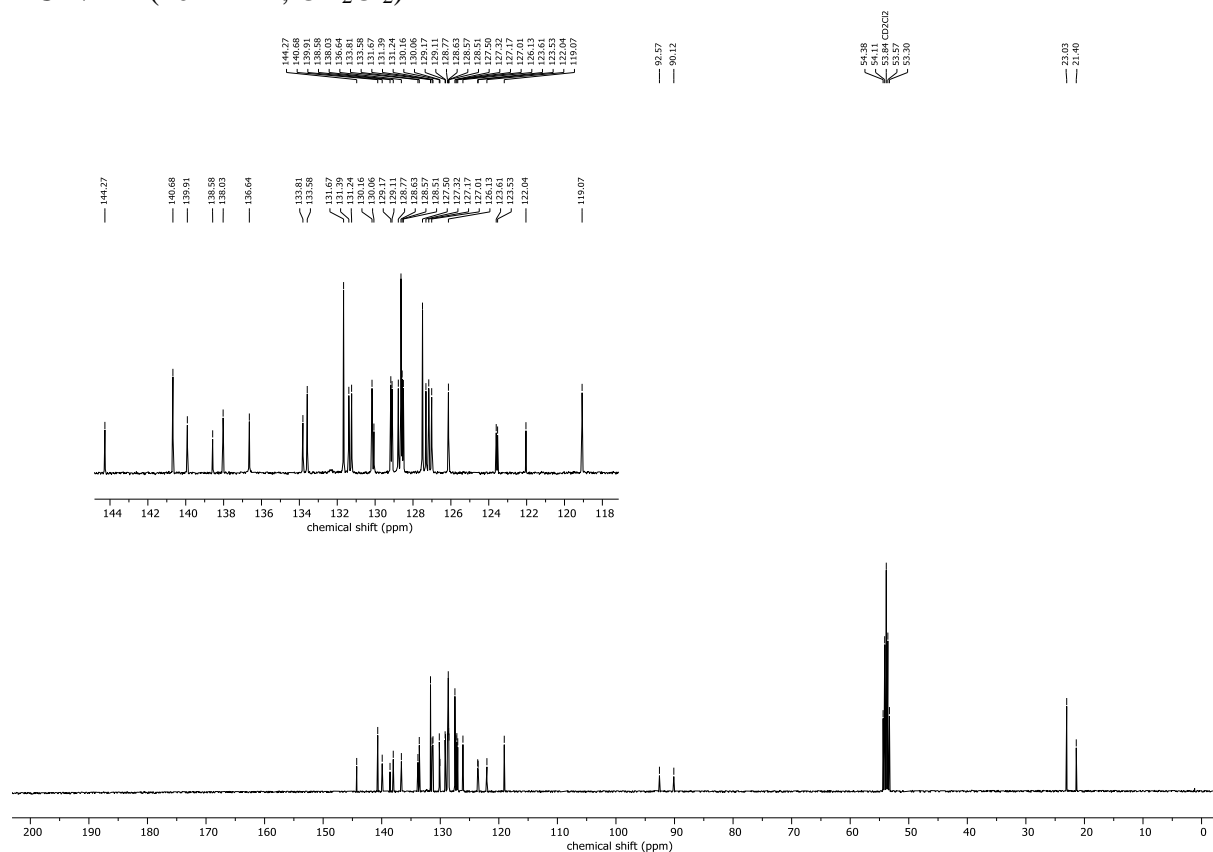

**$^{11}\text{B}$  NMR** (161 MHz,  $\text{CD}_2\text{Cl}_2$ )

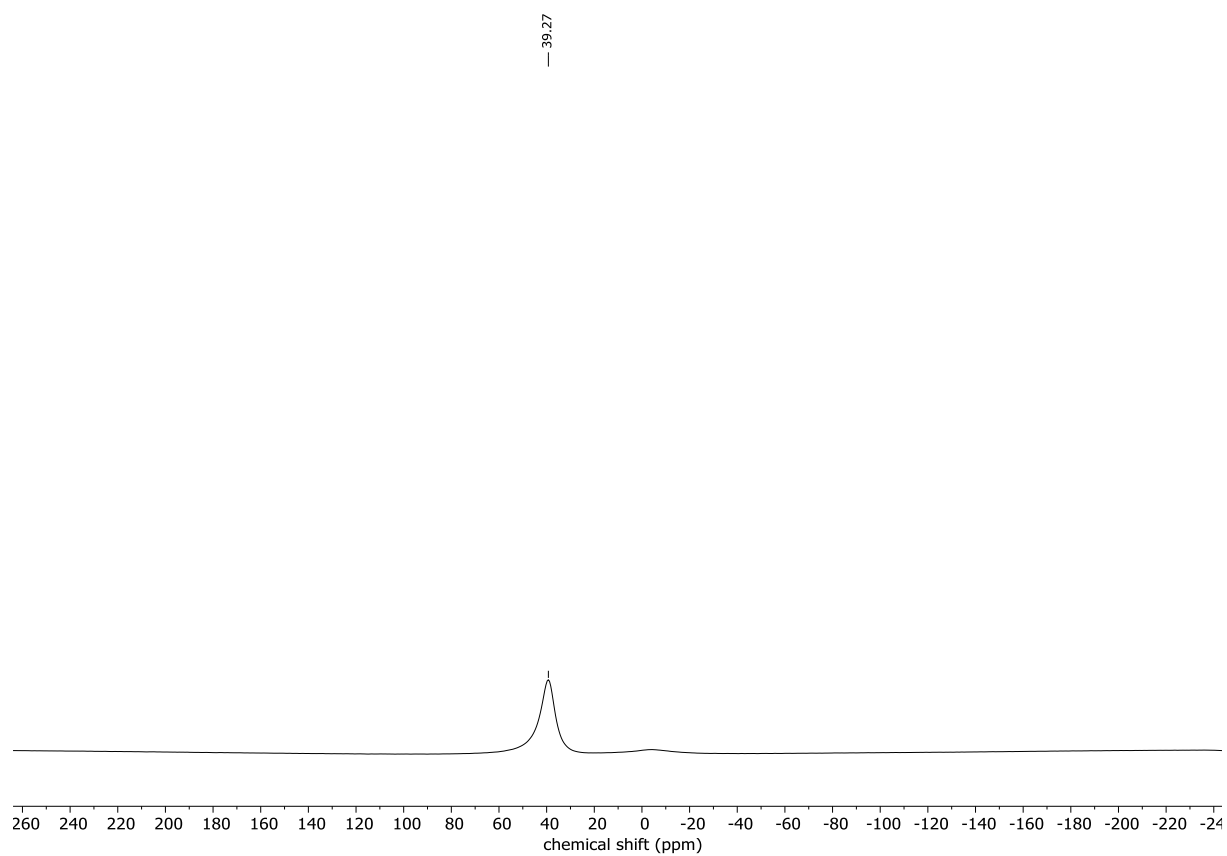

# <sup>1</sup>H NMR (400 MHz, CDCl<sub>3</sub>) 5b

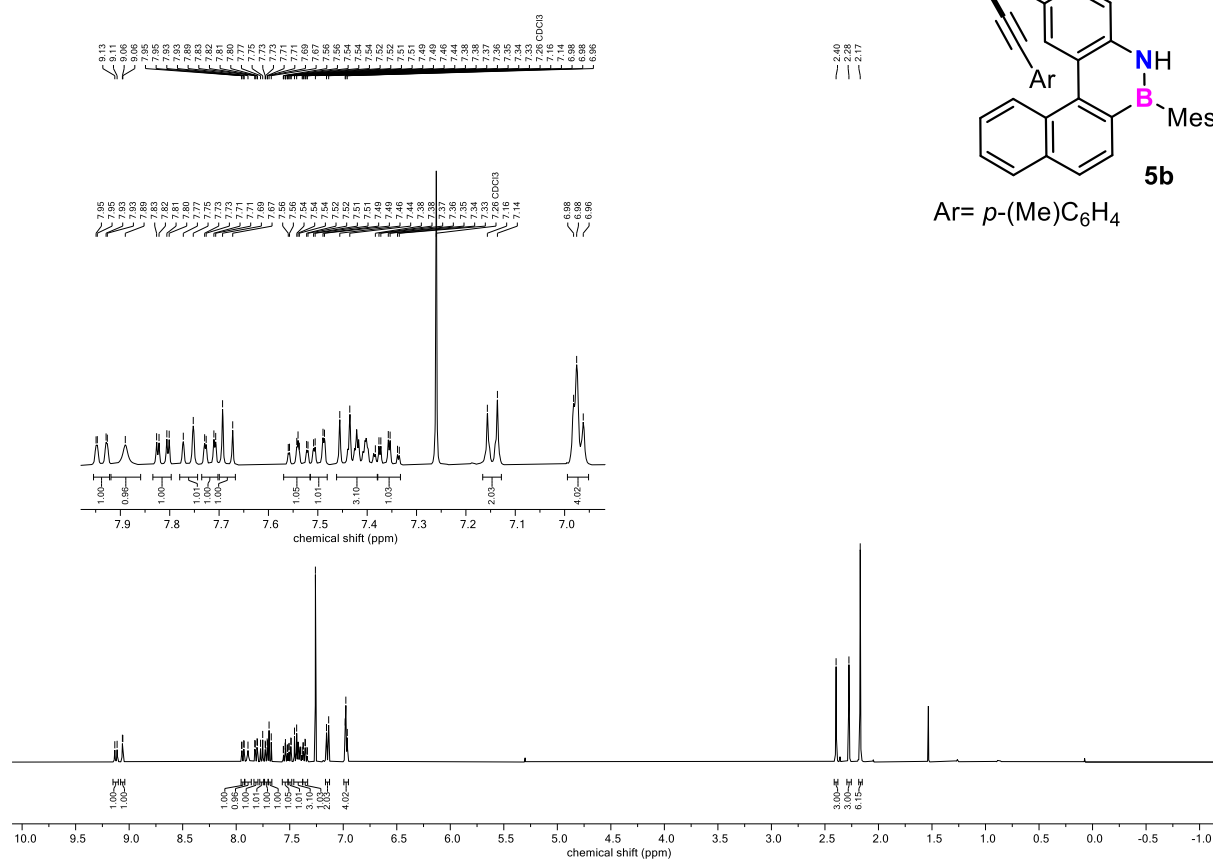

# <sup>13</sup>C NMR (101 MHz, CDCl<sub>3</sub>)

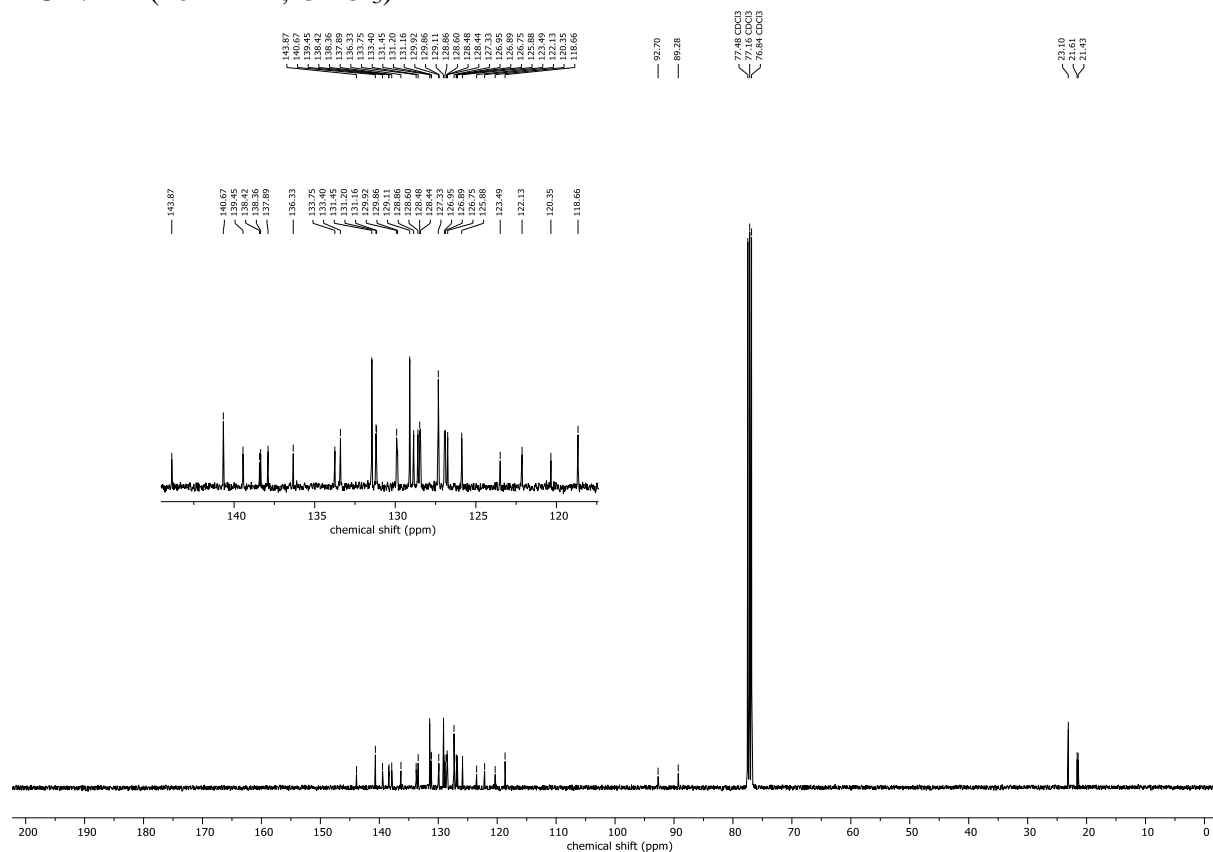

**$^{11}\text{B}$  NMR (161 MHz,  $\text{CDCl}_3$ )**

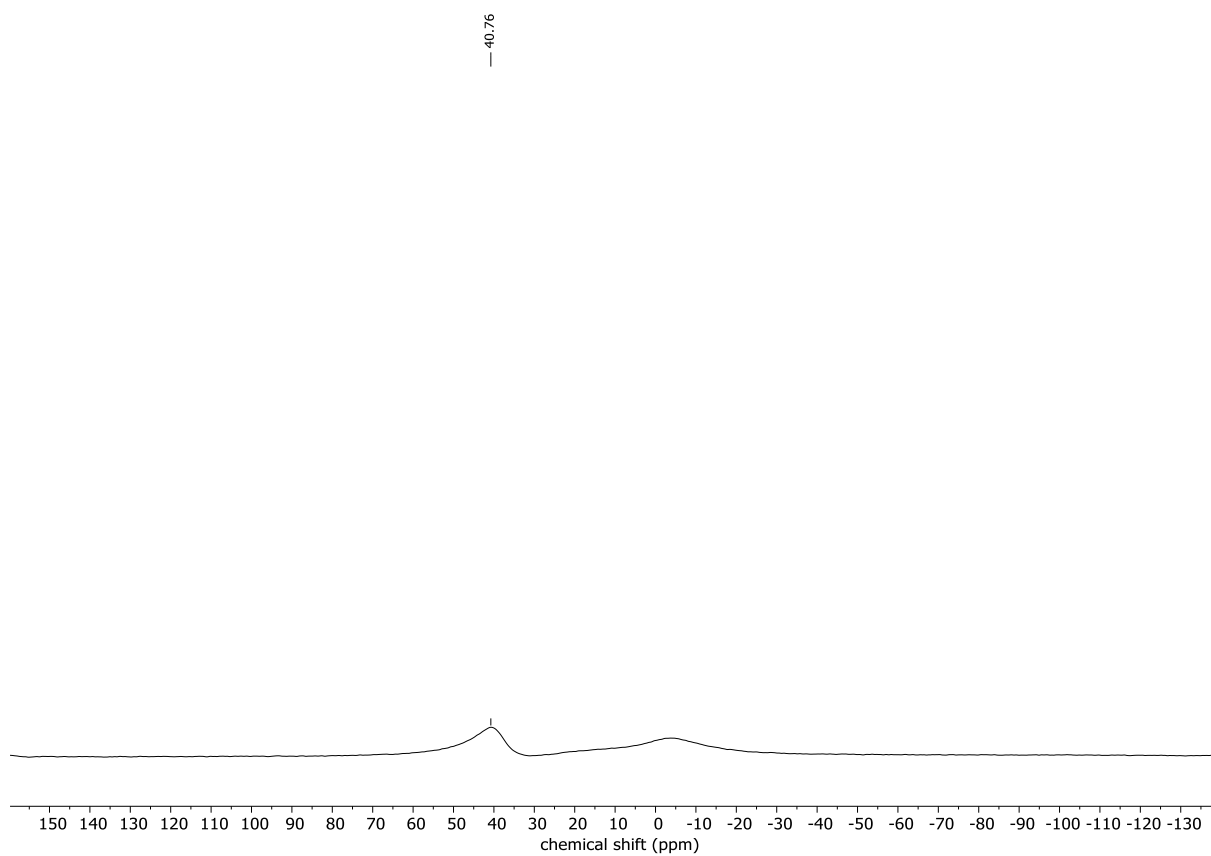

# <sup>1</sup>H NMR (400 MHz, CDCl<sub>3</sub>) 5c

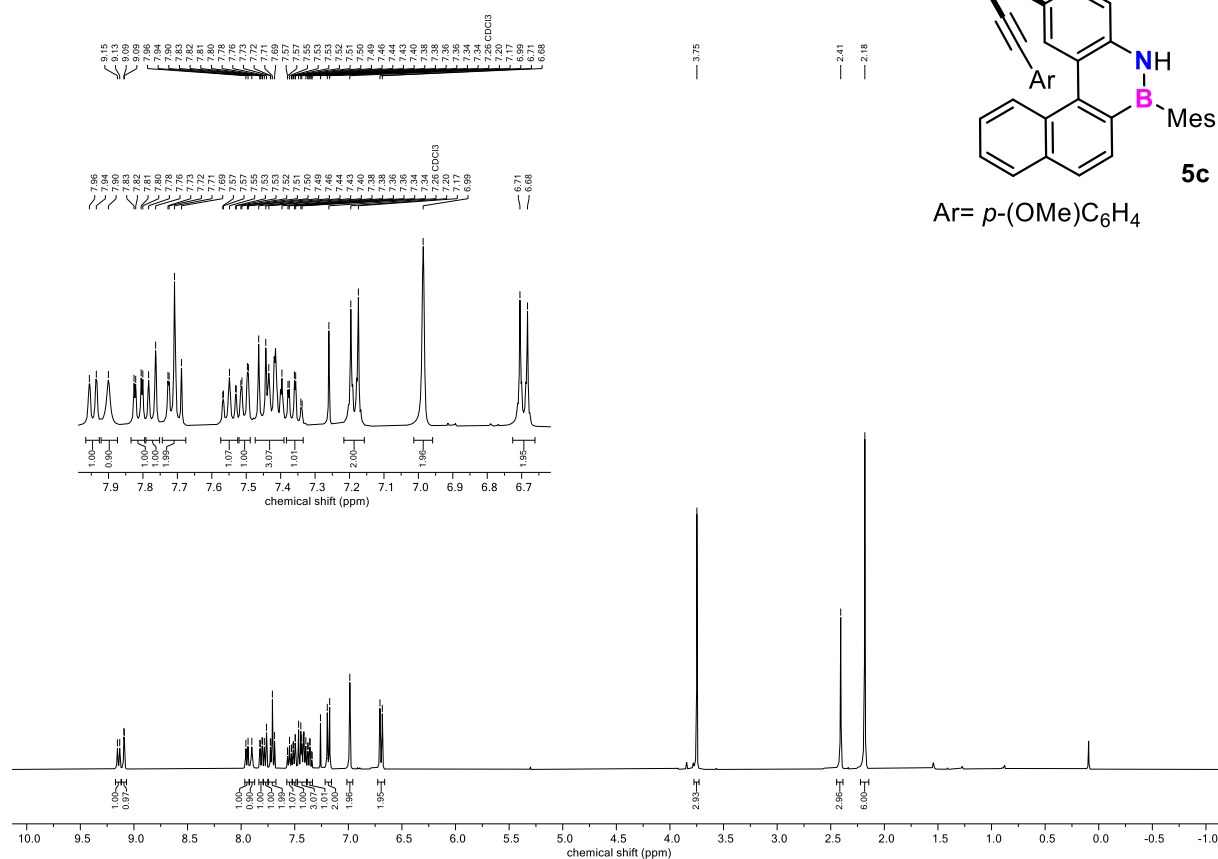

# <sup>13</sup>C NMR (101 MHz, CDCl<sub>3</sub>)

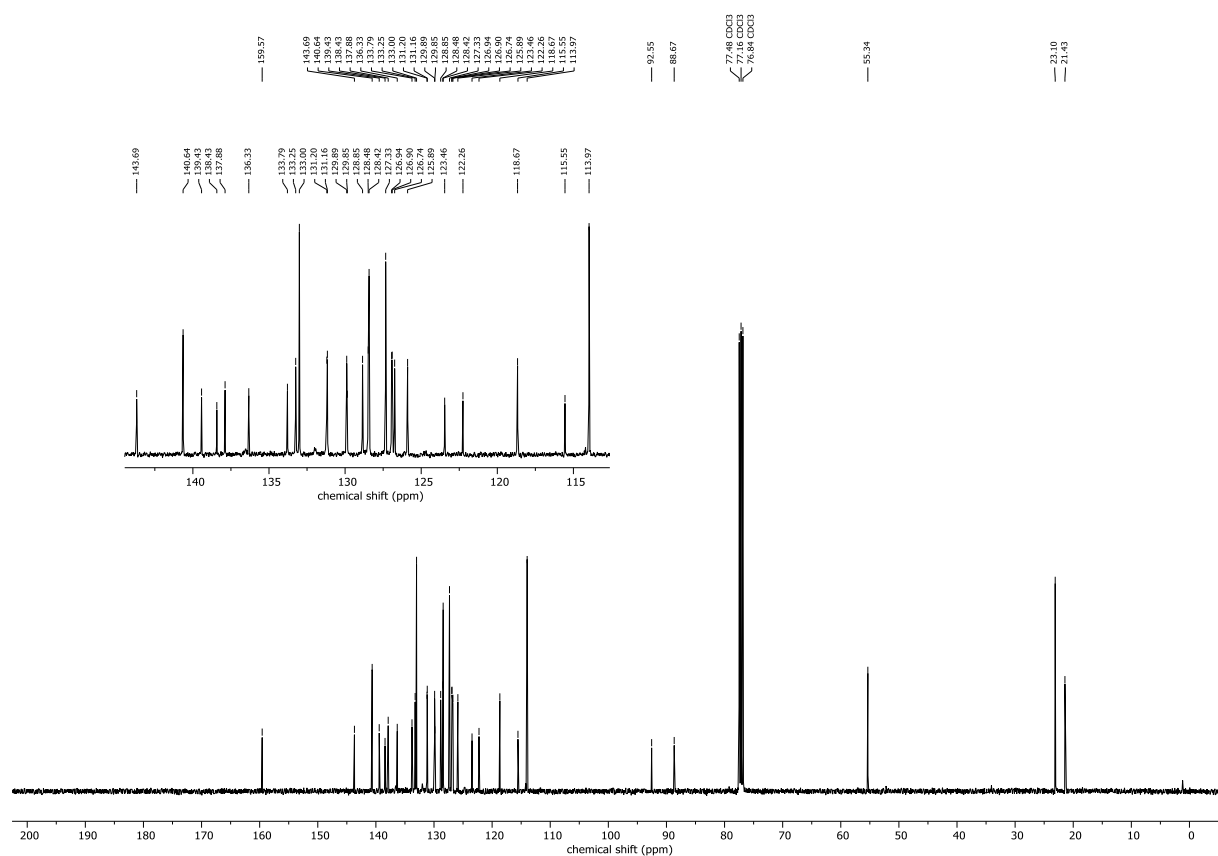

**$^{11}\text{B}$  NMR (161 MHz,  $\text{CDCl}_3$ )**

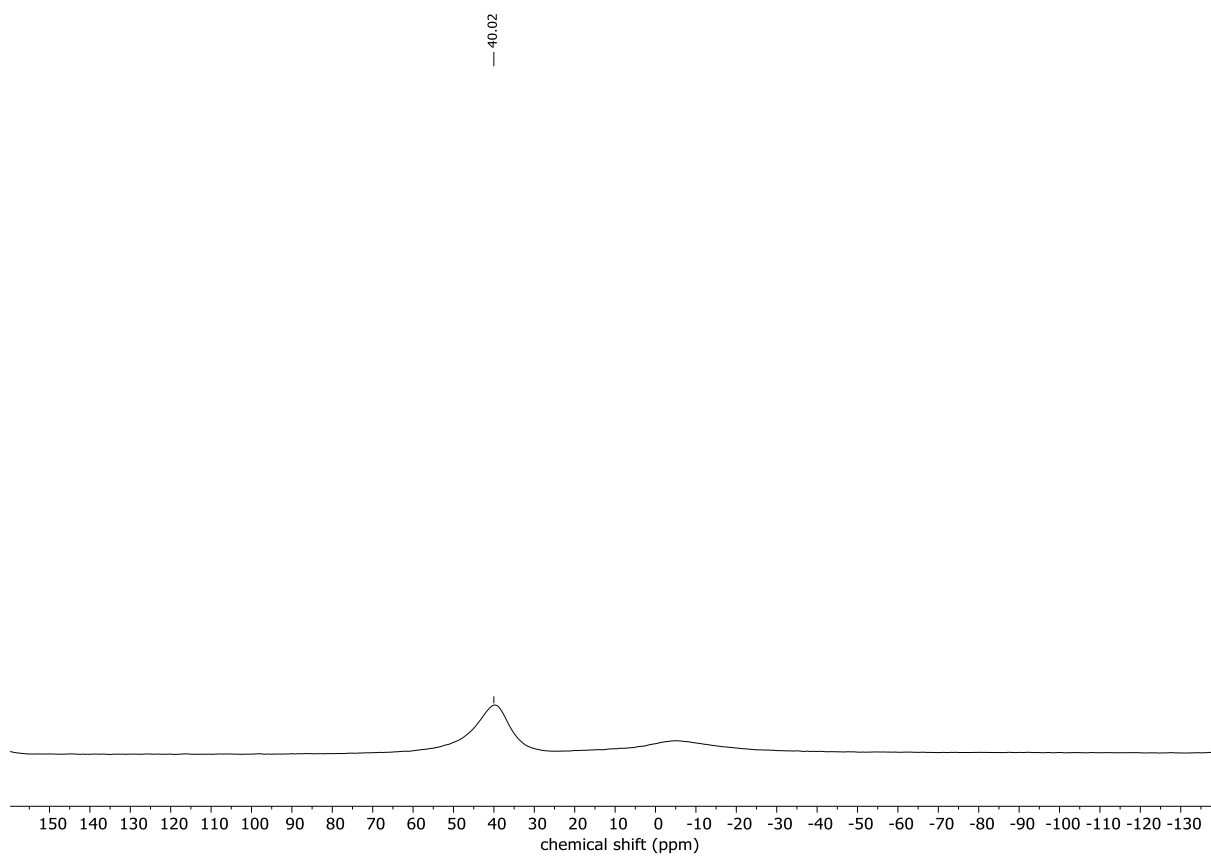

# <sup>1</sup>H NMR (400 MHz, CDCl<sub>3</sub>) 5d

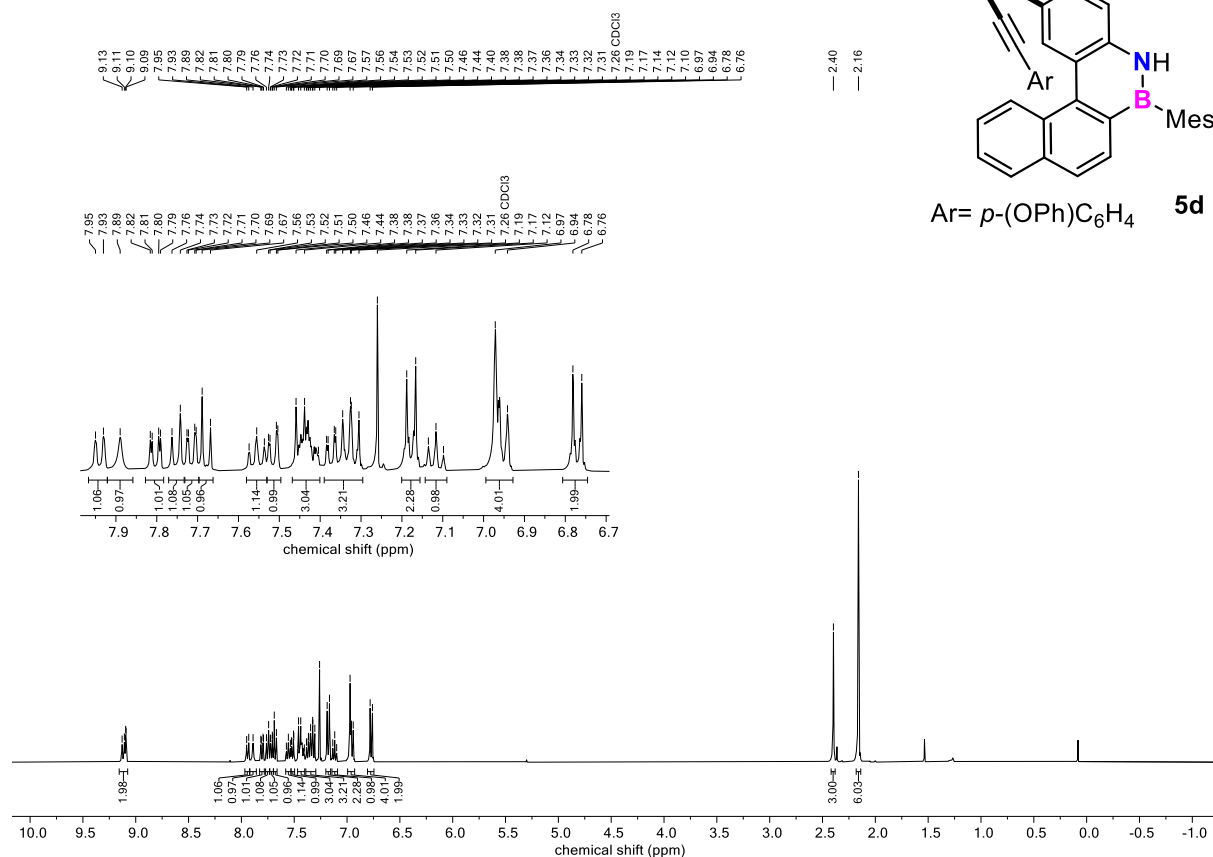

# <sup>13</sup>C NMR (101 MHz, CDCl<sub>3</sub>)

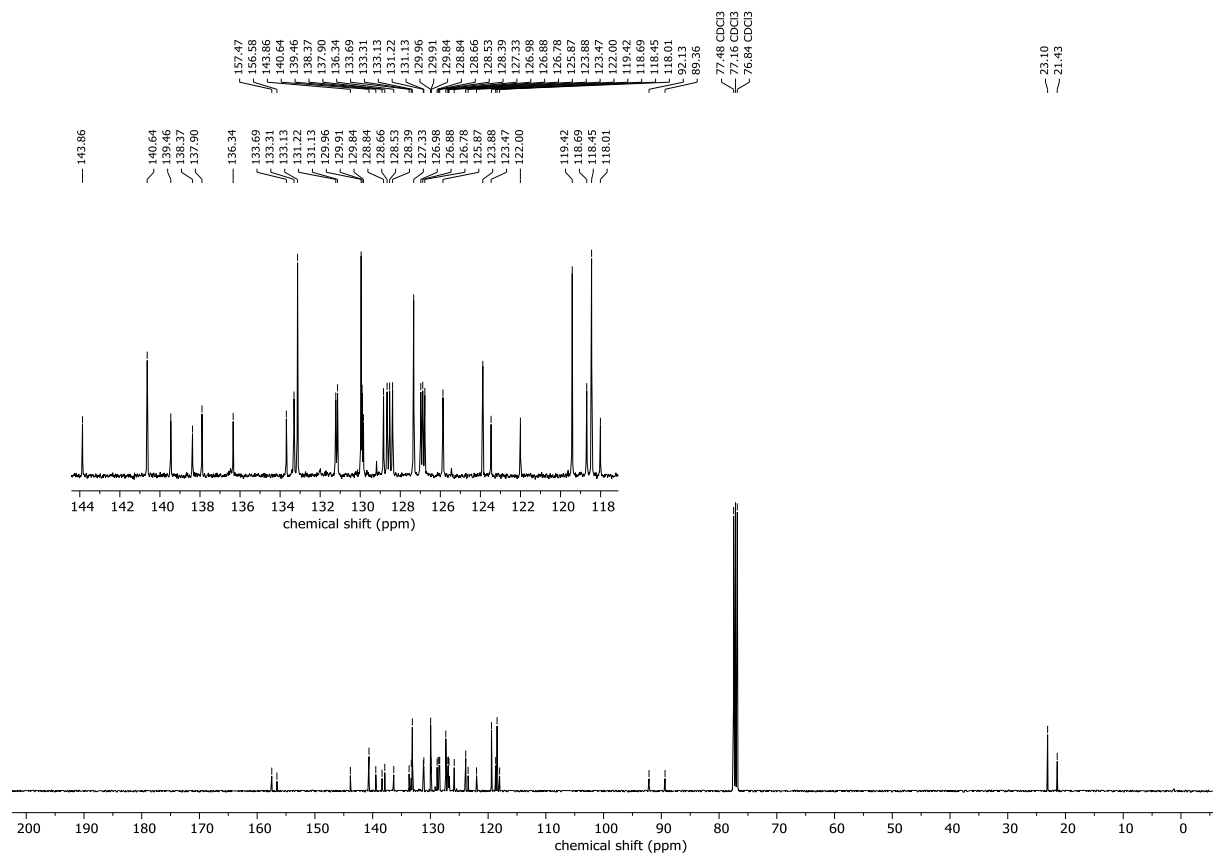

**$^{11}\text{B}$  NMR (161 MHz,  $\text{CDCl}_3$ )**

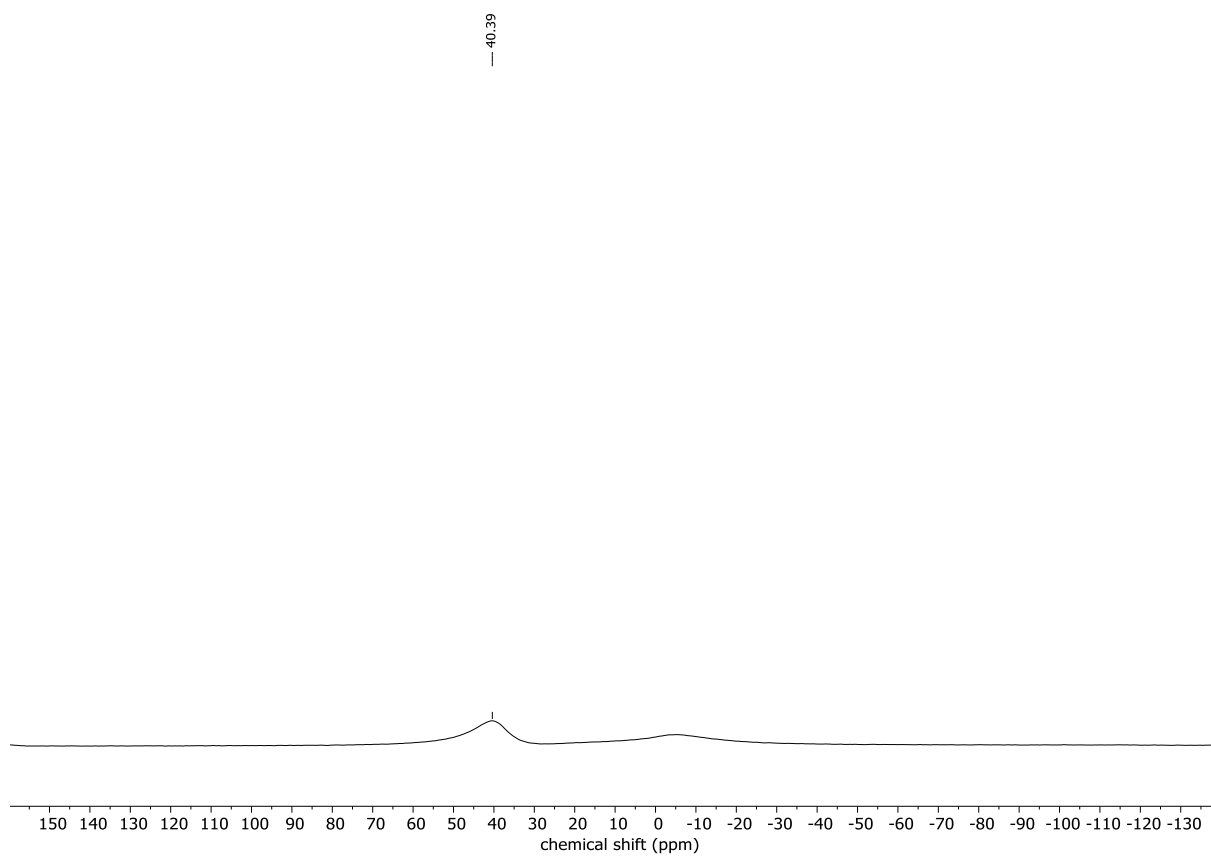

# <sup>1</sup>H NMR (400 MHz, CDCl<sub>3</sub>) 5e

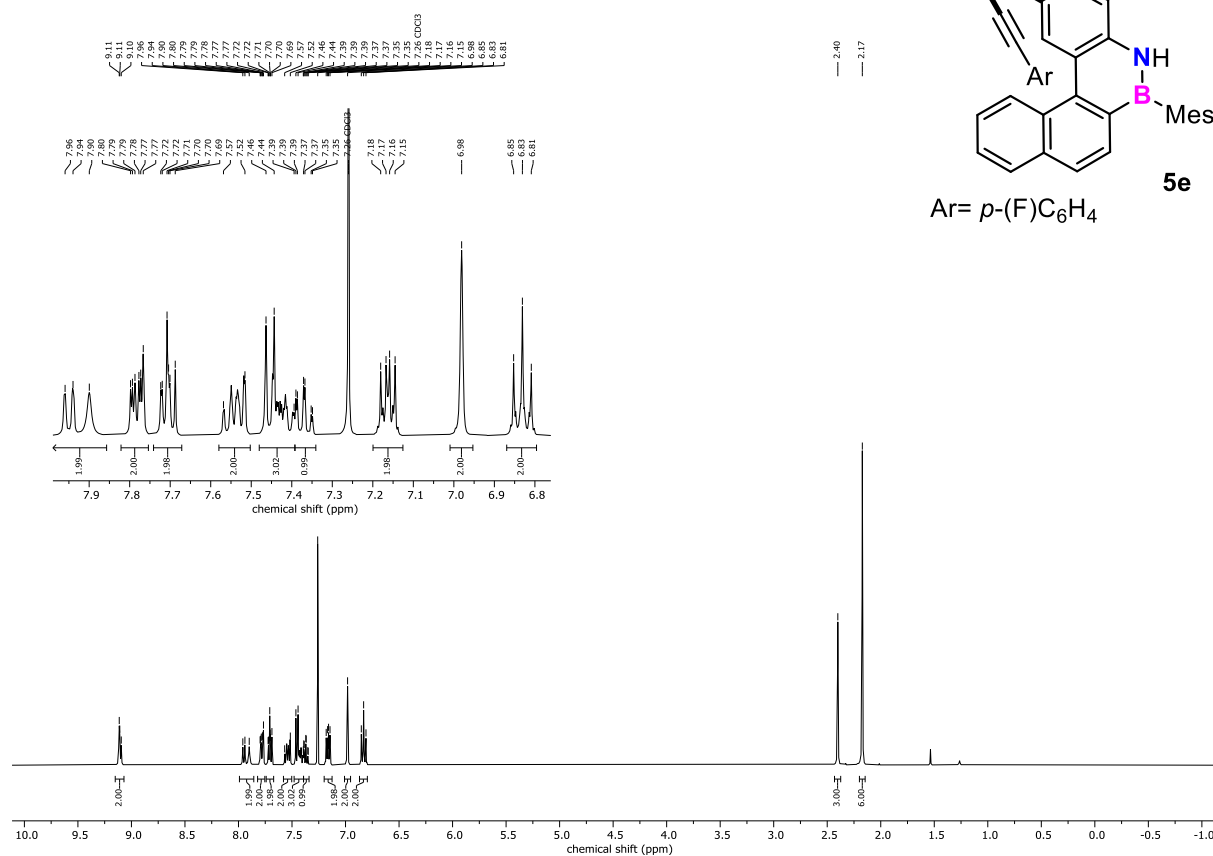

# <sup>13</sup>C NMR (101 MHz, CDCl<sub>3</sub>)

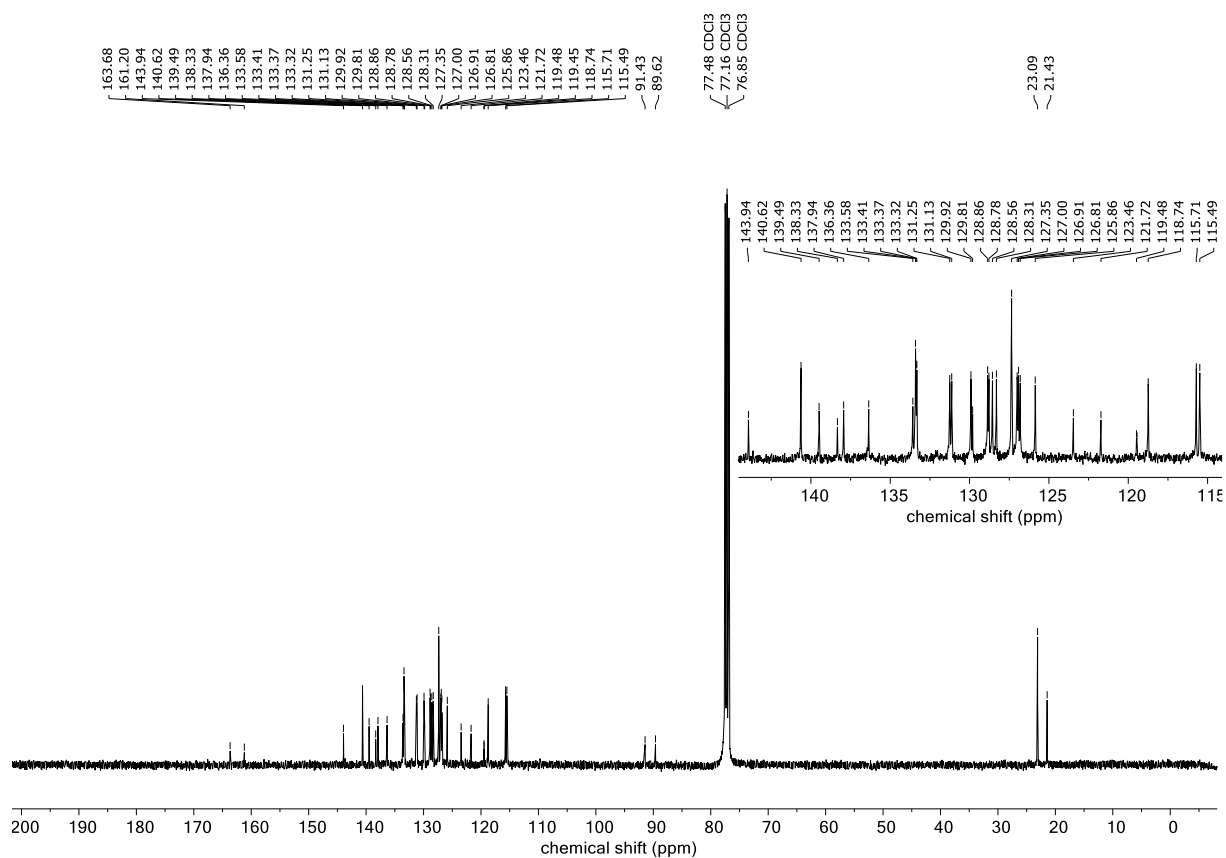

**$^{11}\text{B}$  NMR (161 MHz,  $\text{CDCl}_3$ )**

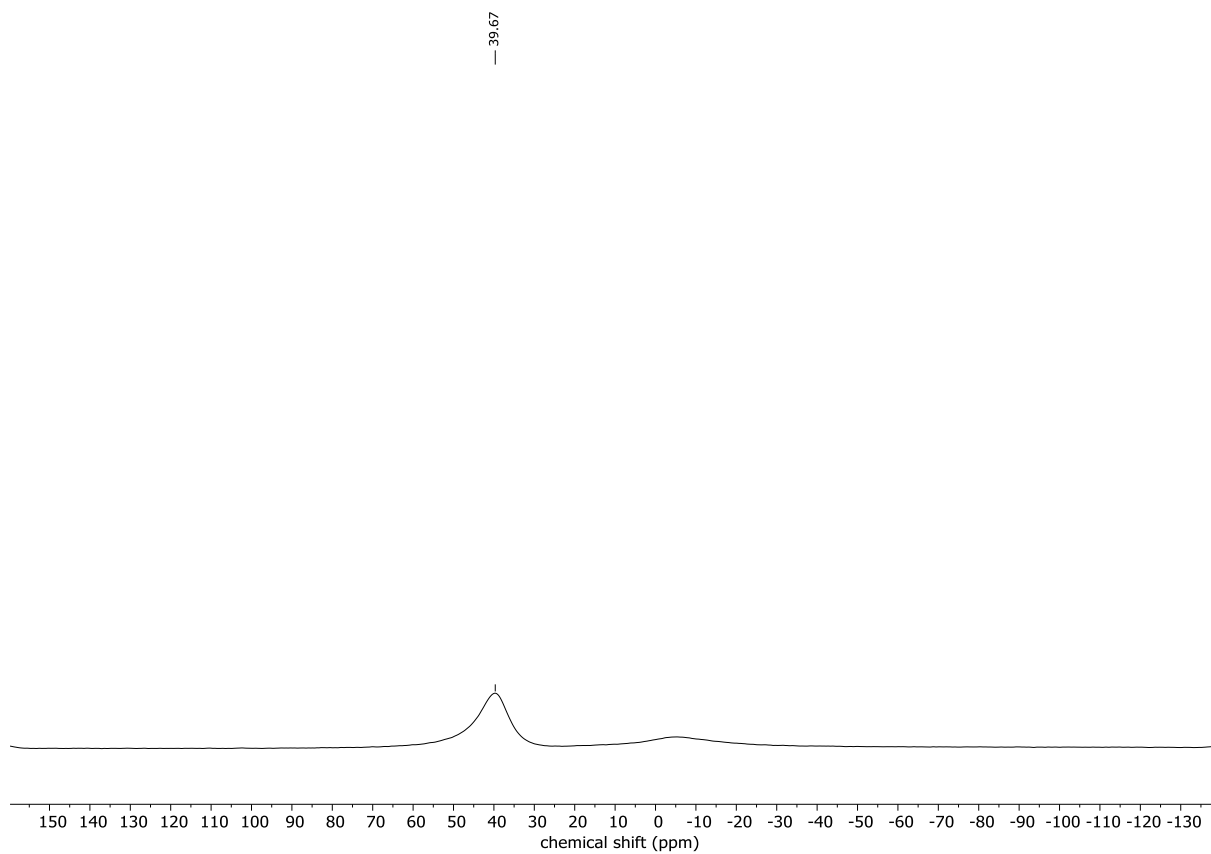

**$^{19}\text{F}$  NMR (282 MHz,  $\text{CDCl}_3$ )**

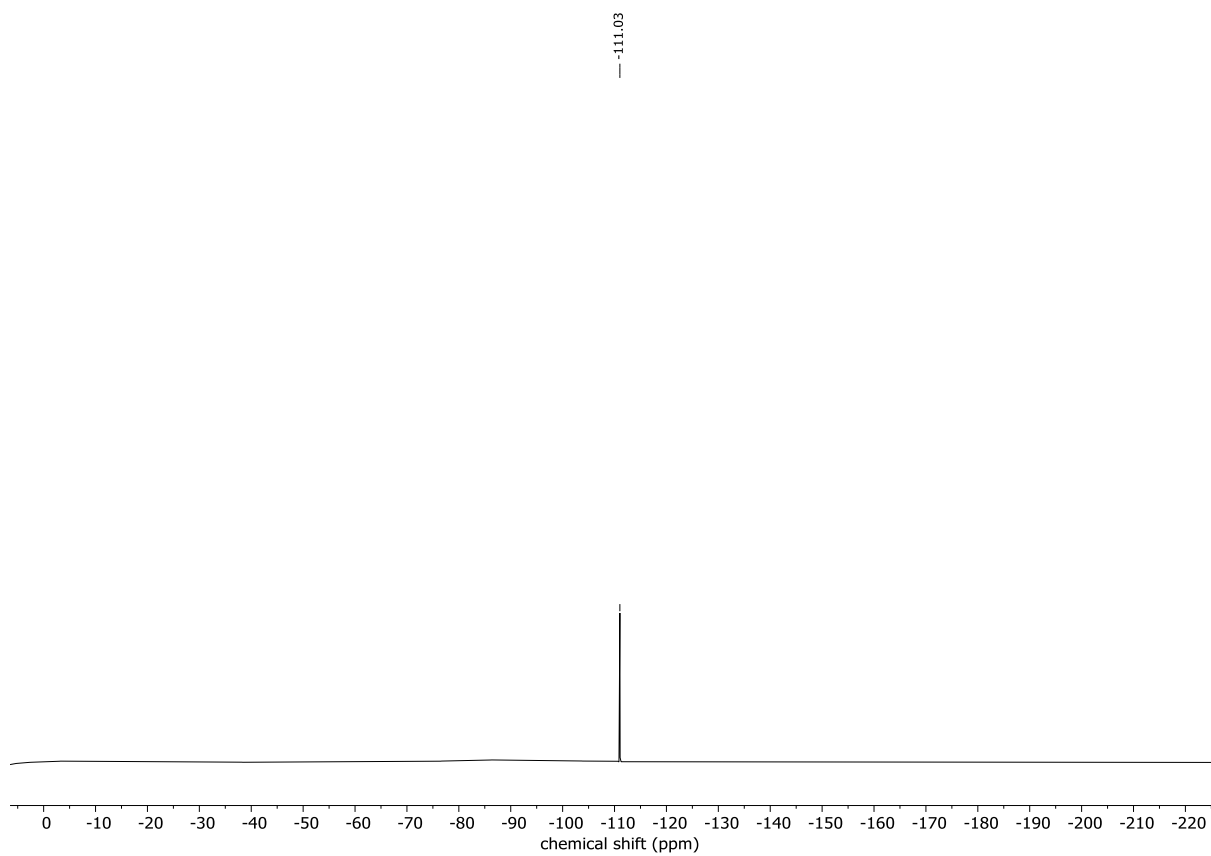

**$^1\text{H}$  NMR (300 MHz,  $\text{CDCl}_3$ ) 5f**

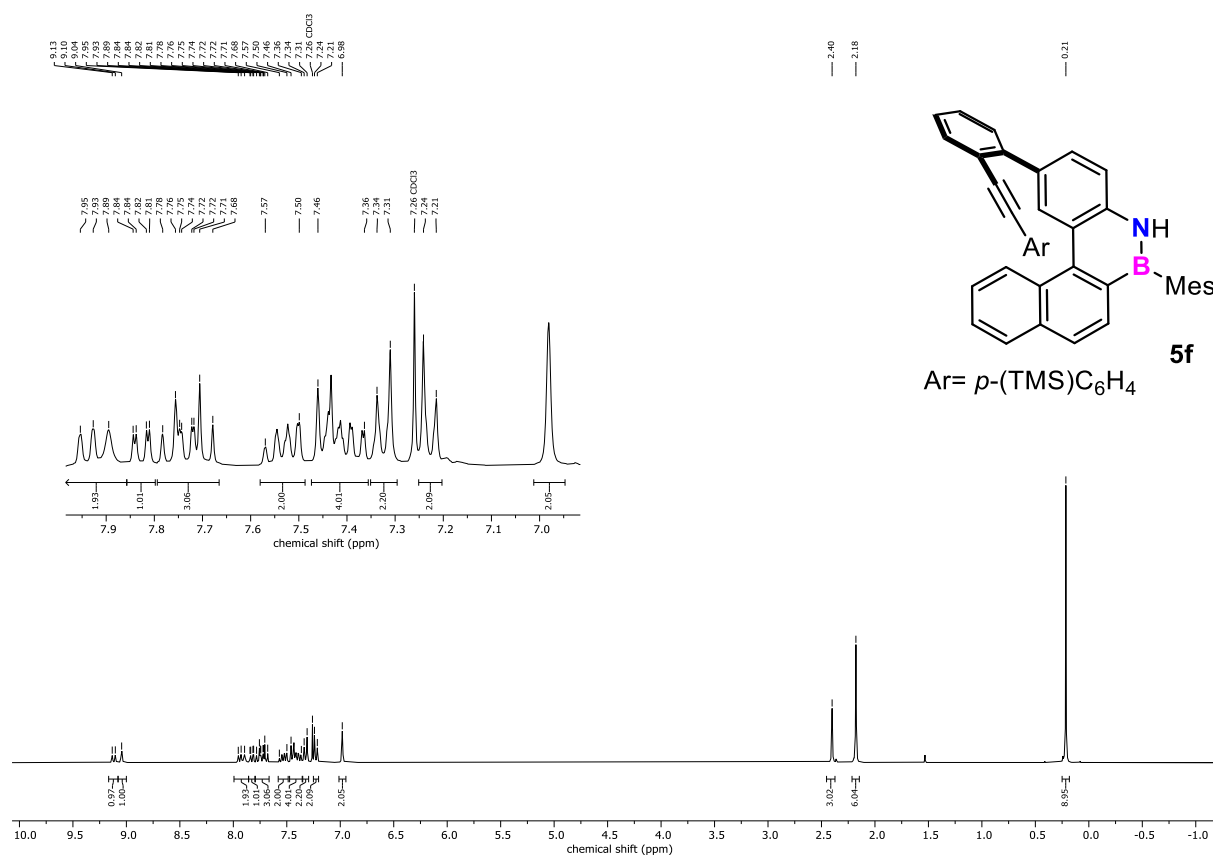

**$^{13}\text{C}$  NMR (101 MHz,  $\text{CDCl}_3$ )**

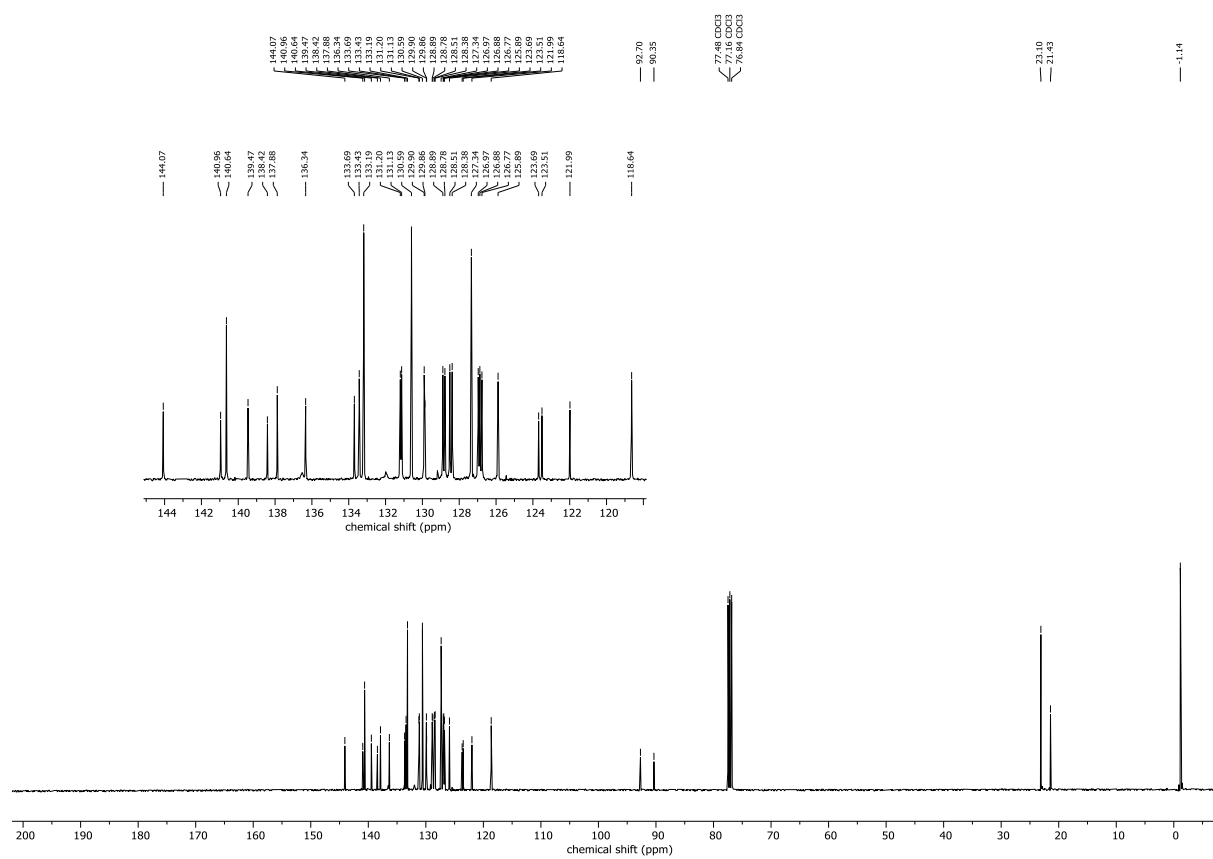

**$^{11}\text{B}$  NMR (161 MHz,  $\text{CDCl}_3$ )**

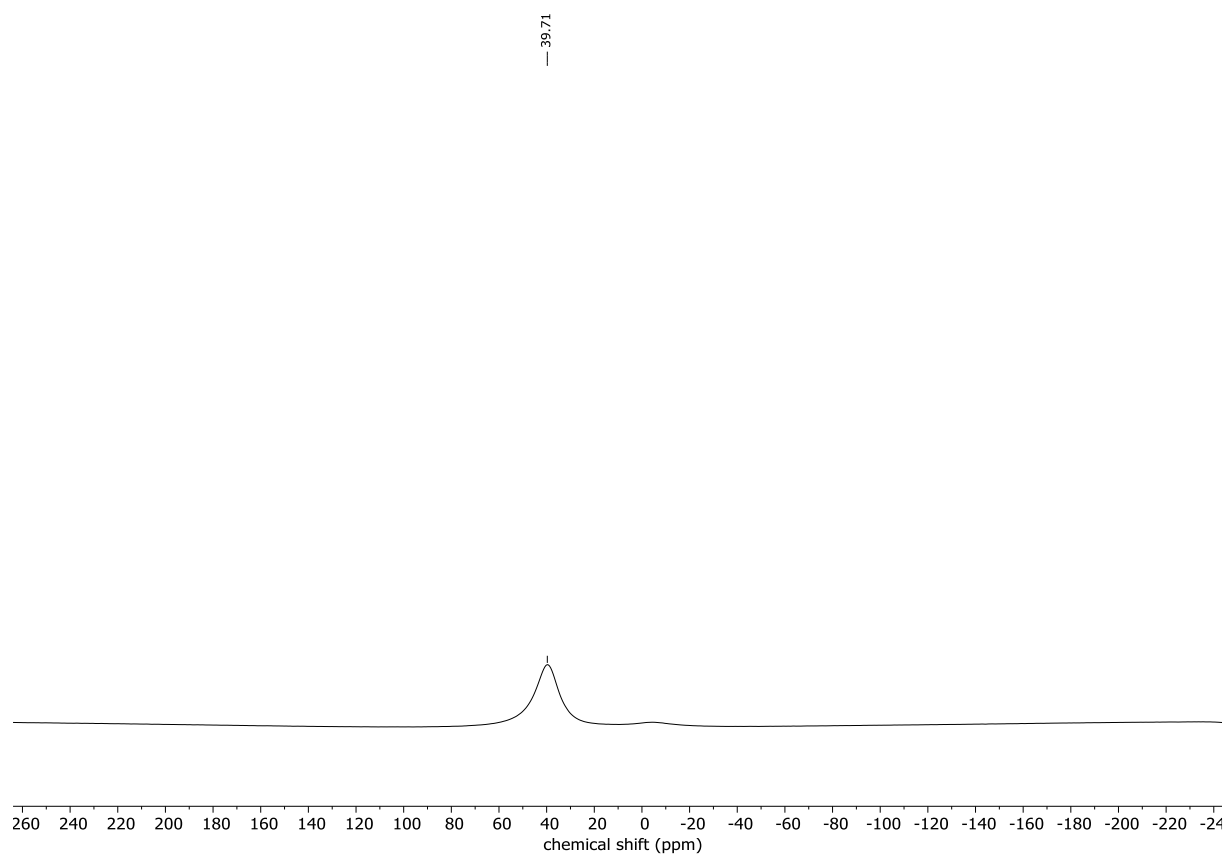

# $^1\text{H}$ NMR (600 MHz, $\text{CD}_2\text{Cl}_2$ ) 5g

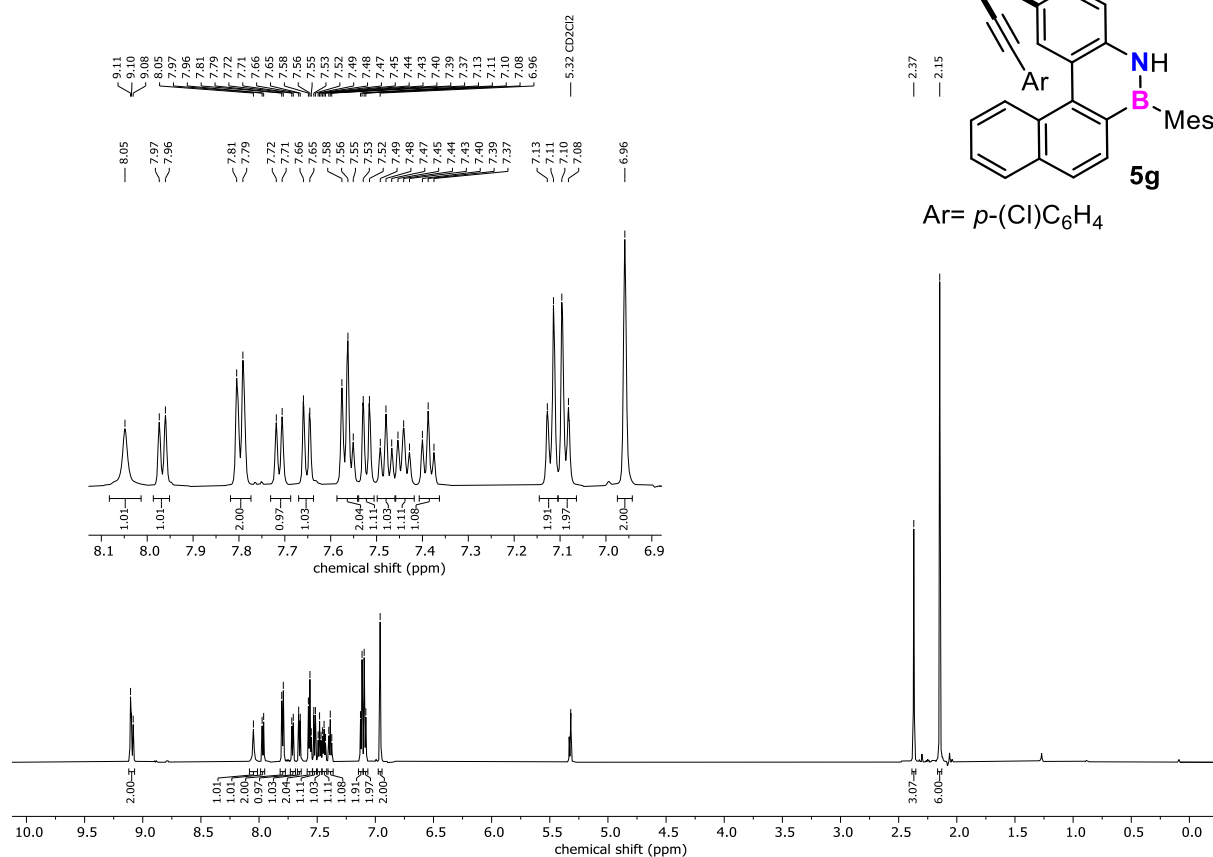

# $^{13}\text{C}$ NMR (101 MHz, $\text{CDCl}_3$ )

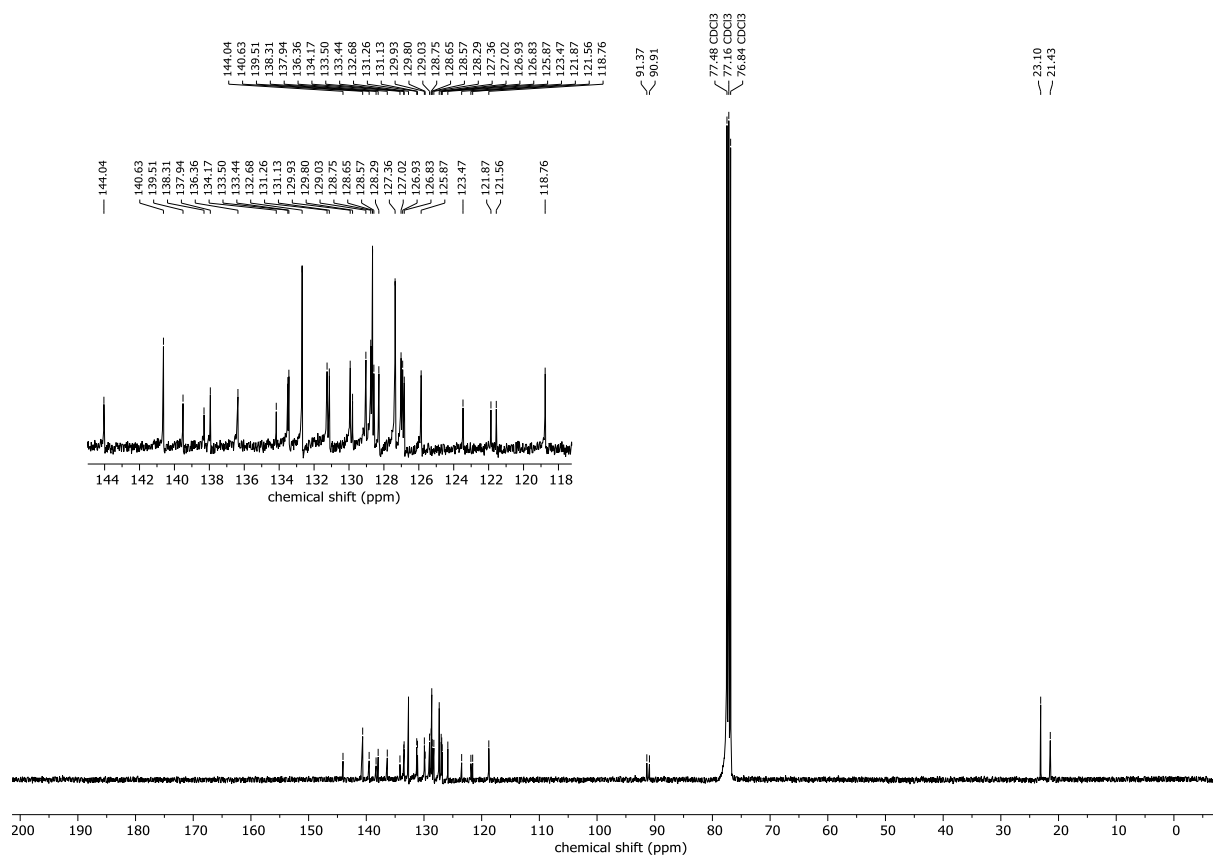

**$^{11}\text{B}$  NMR (161 MHz,  $\text{CDCl}_3$ )**

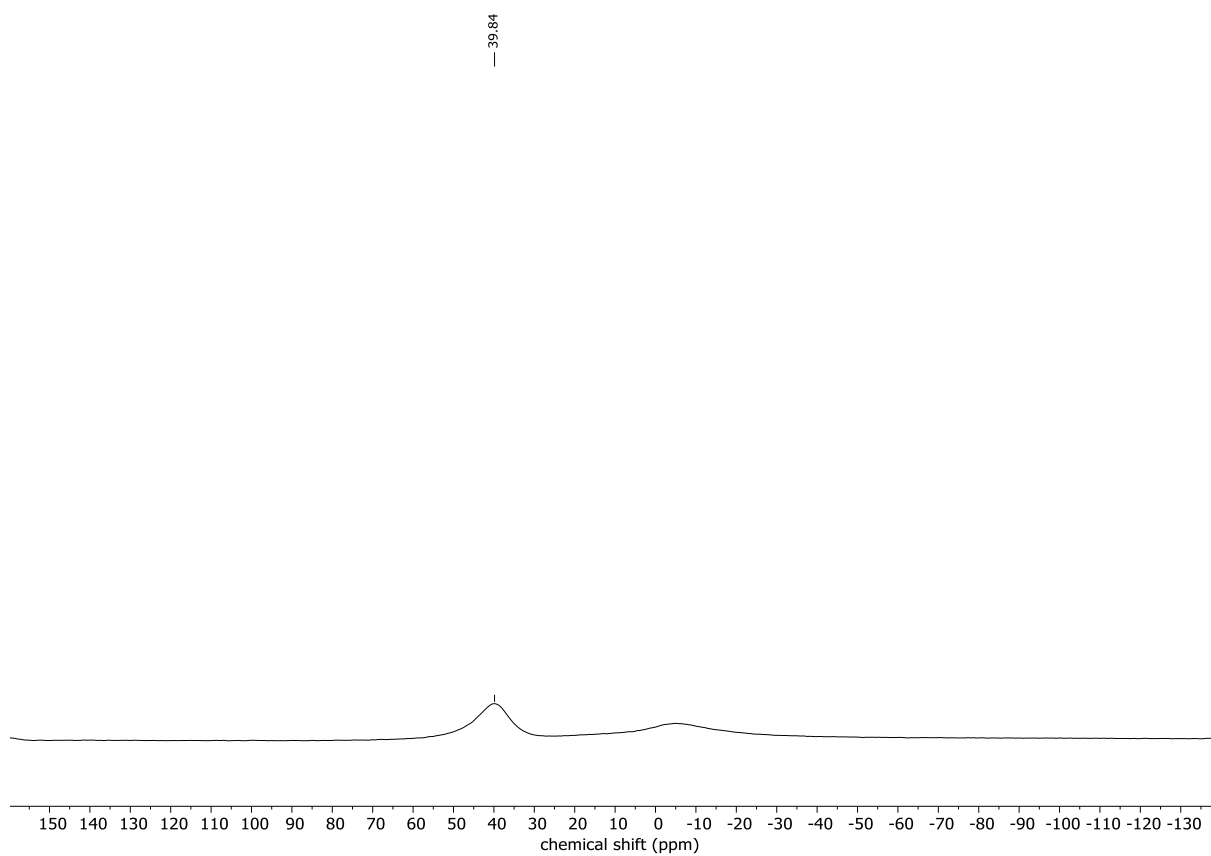

**$^1\text{H}$  NMR (300 MHz,  $\text{CDCl}_3$ ) 5h**

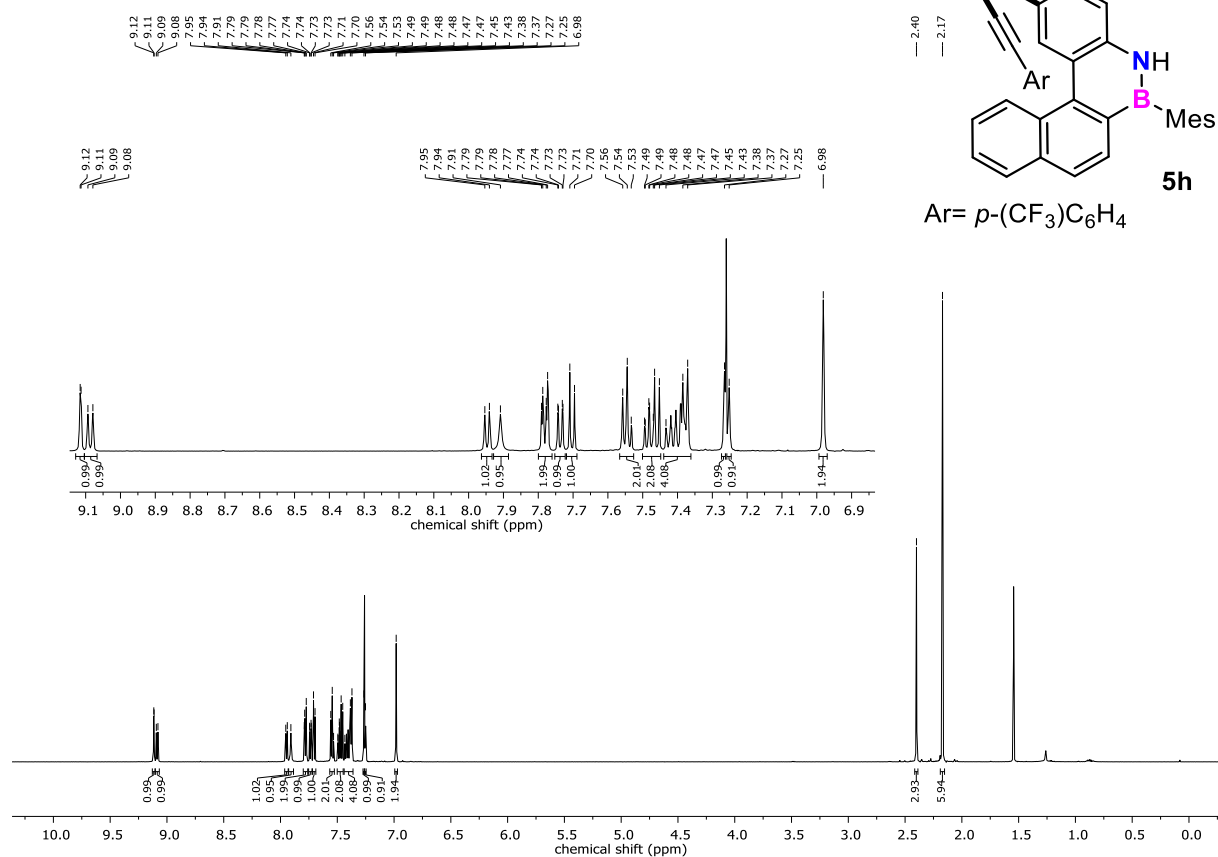

**$^{13}\text{C}$  NMR (126 MHz,  $\text{CDCl}_3$ )**

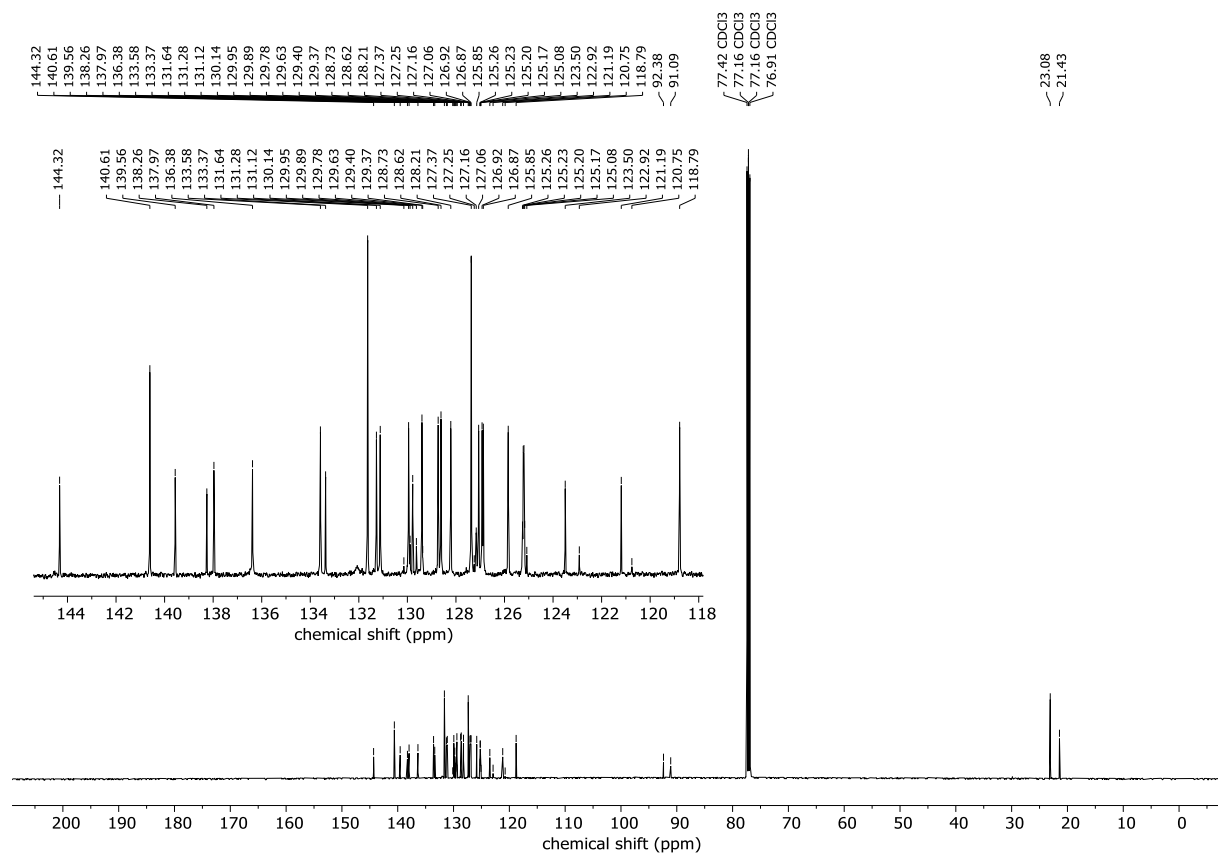

**$^{11}\text{B}$  NMR (161 MHz,  $\text{CDCl}_3$ )**

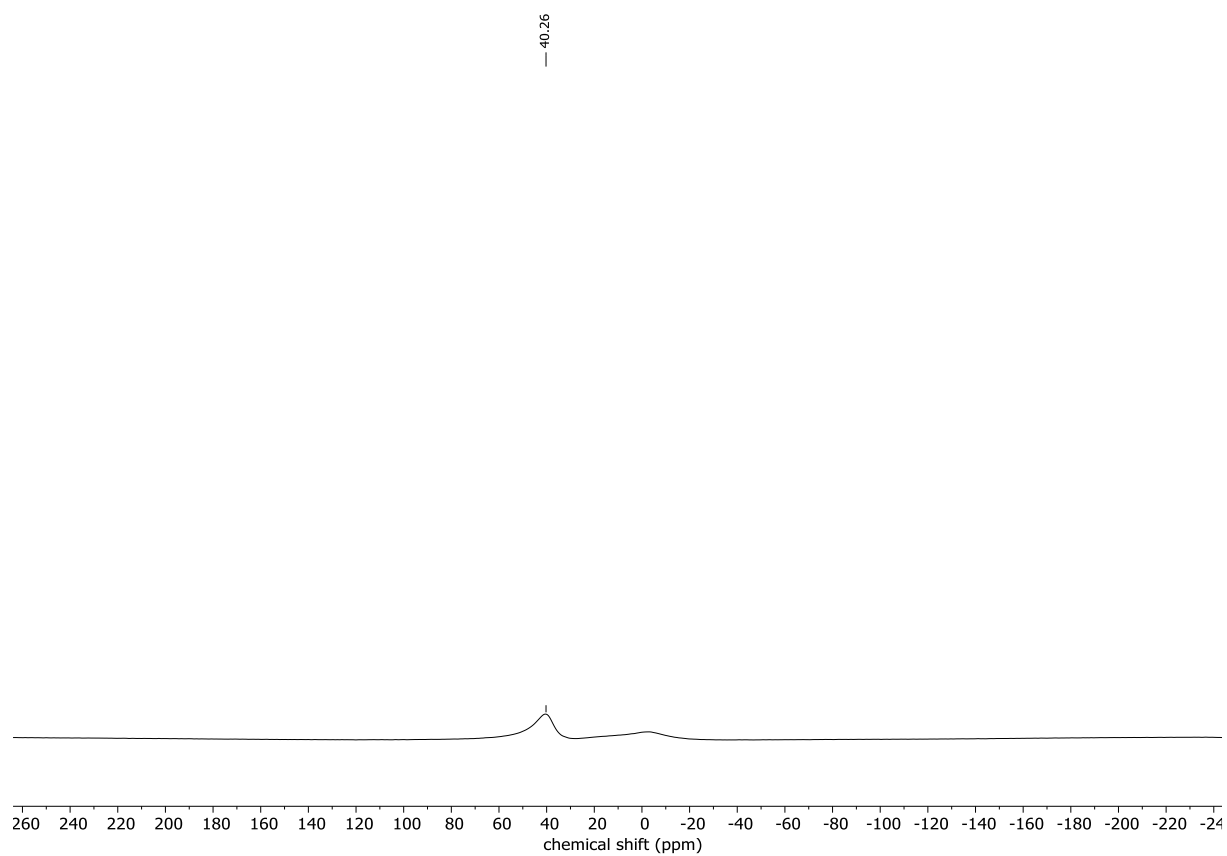

**$^{19}\text{F}$  NMR (377 MHz,  $\text{CDCl}_3$ )**

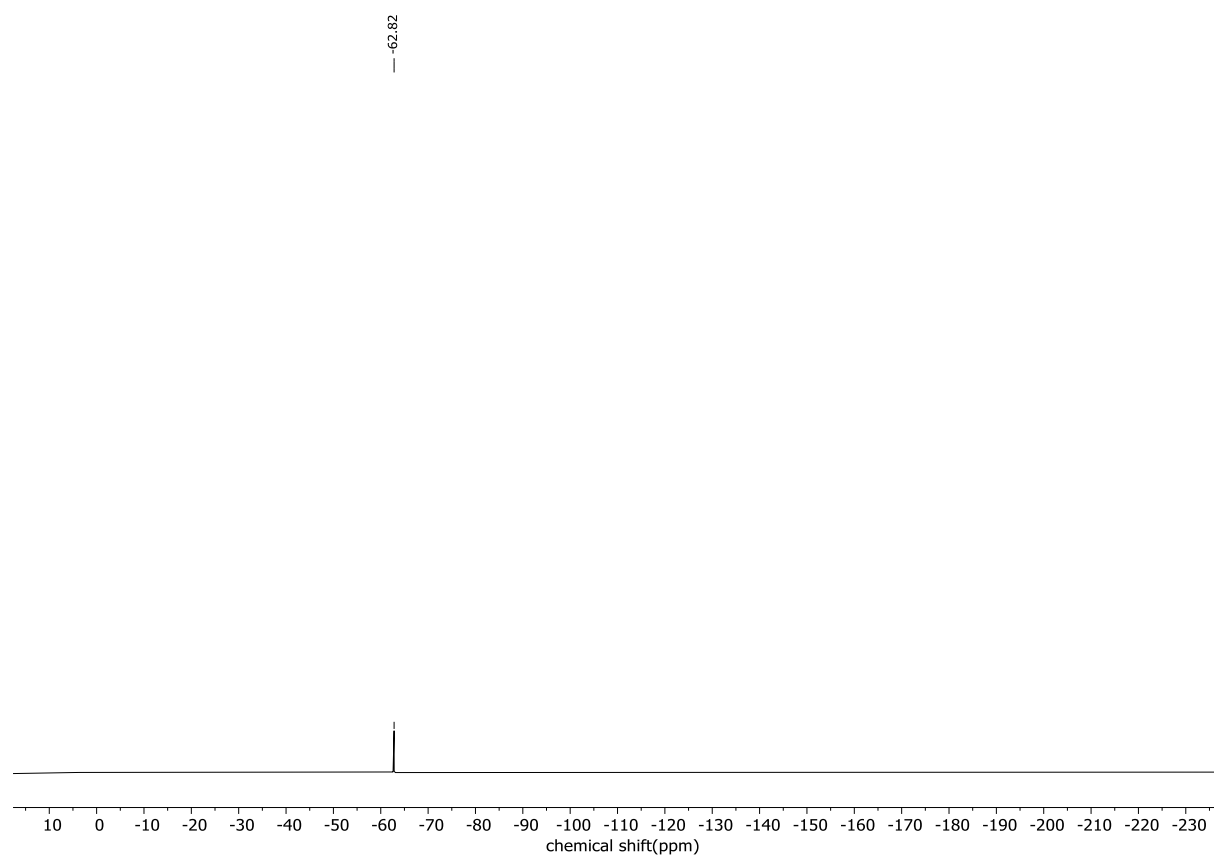

# $^1\text{H}$ NMR (300 MHz, $\text{CDCl}_3$ ) **5i**

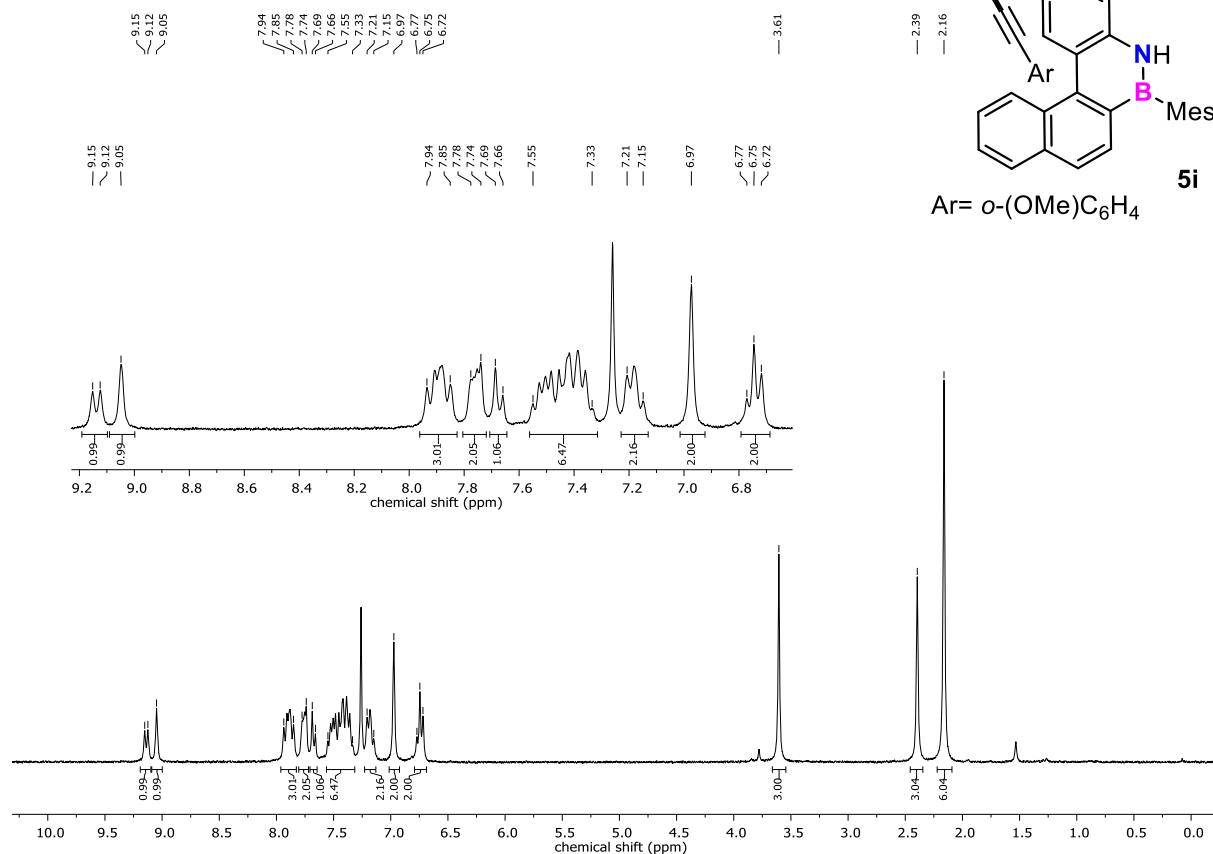

# $^{13}\text{C}$ NMR (101 MHz, $\text{CDCl}_3$ )

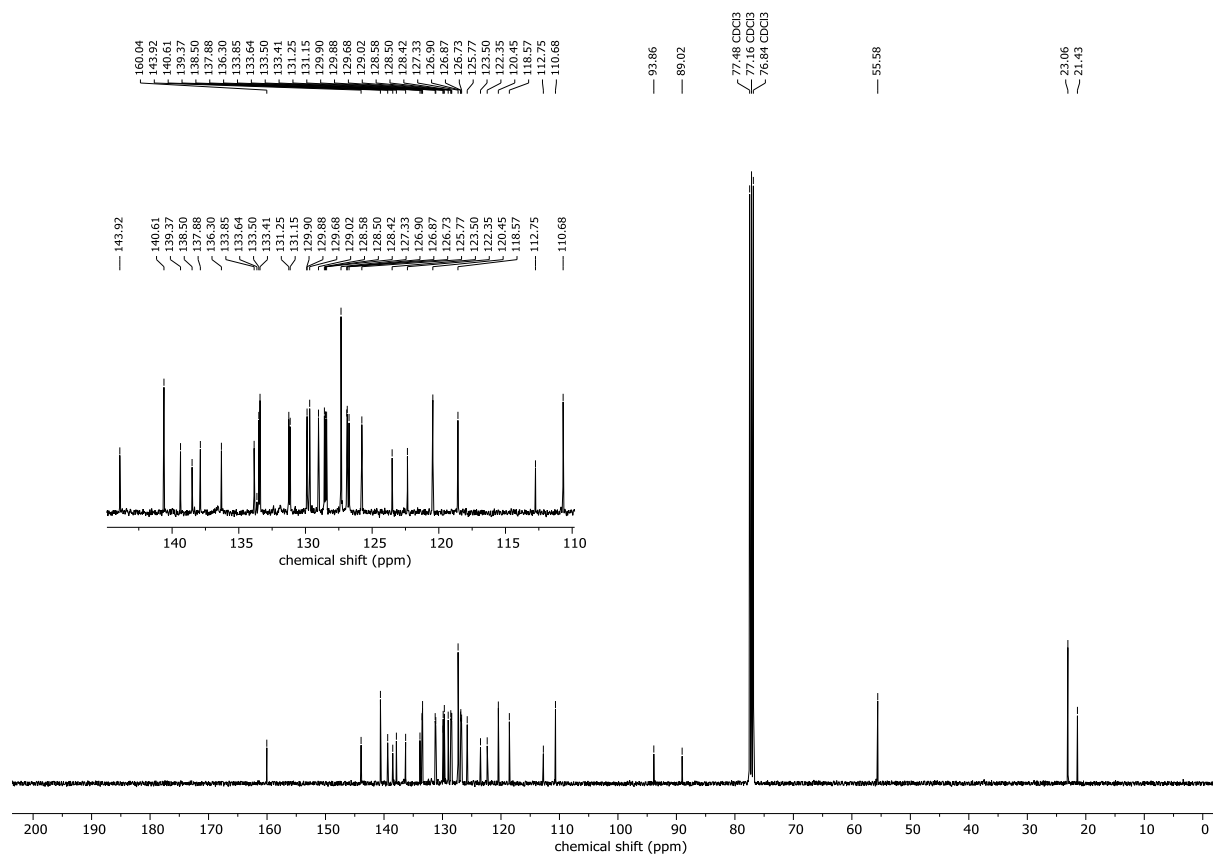

**$^{11}\text{B}$  NMR (161 MHz,  $\text{CDCl}_3$ )**

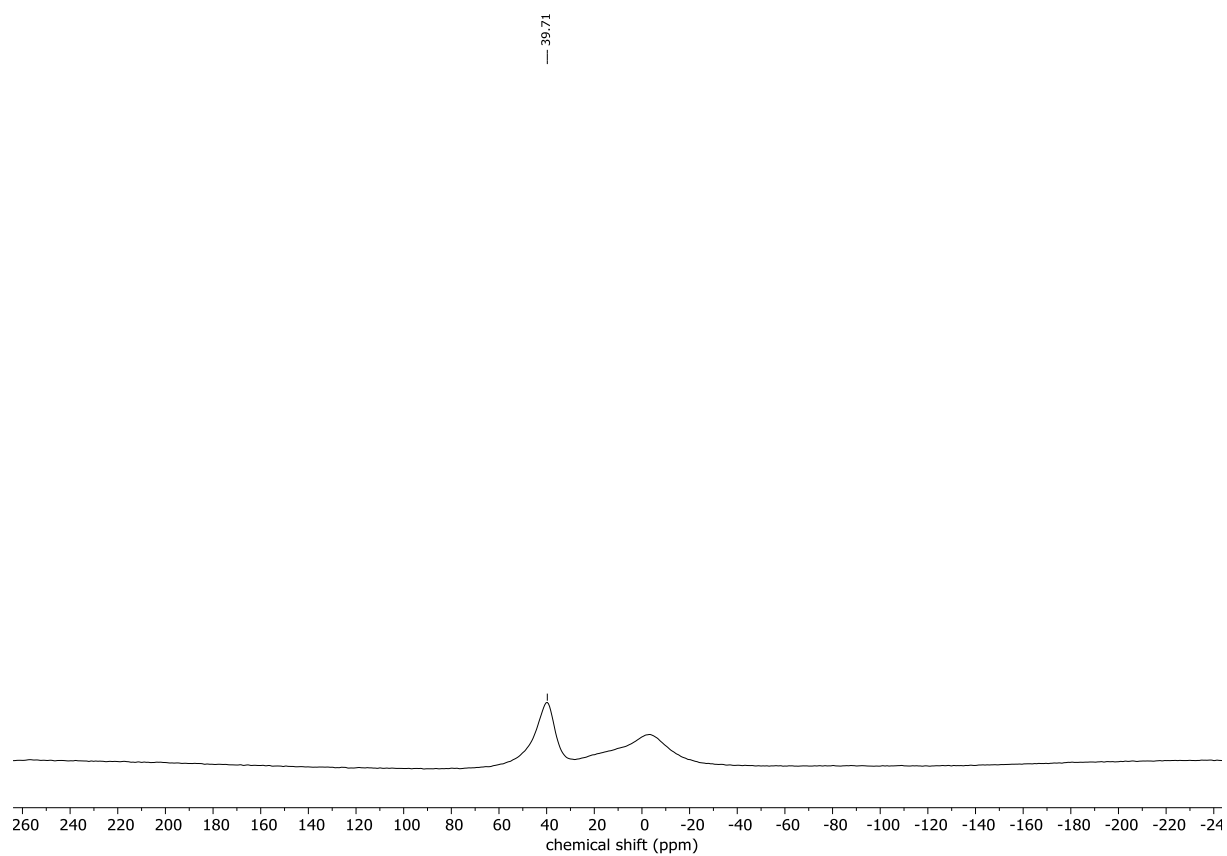

**<sup>1</sup>H NMR (400 MHz, CDCl<sub>3</sub>) 5j**

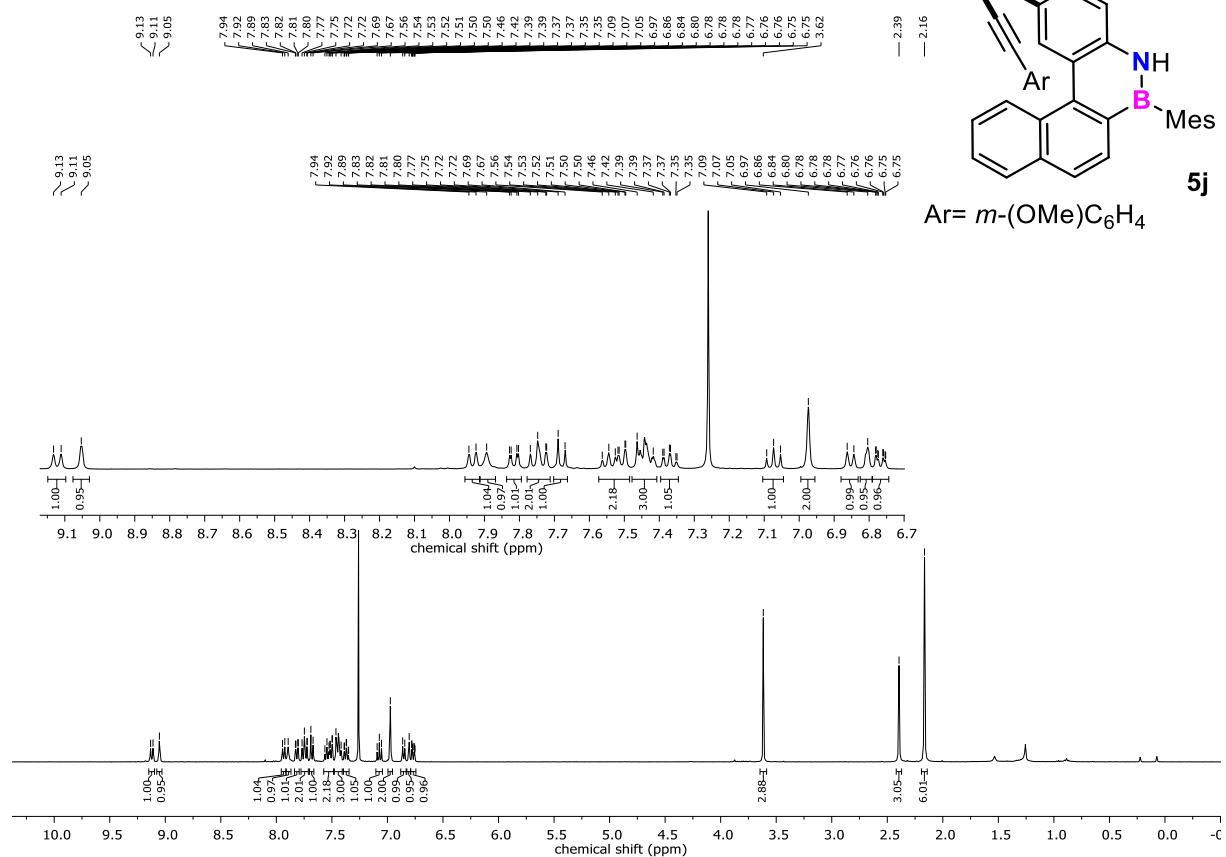

**<sup>13</sup>C NMR (101 MHz, CDCl<sub>3</sub>)**

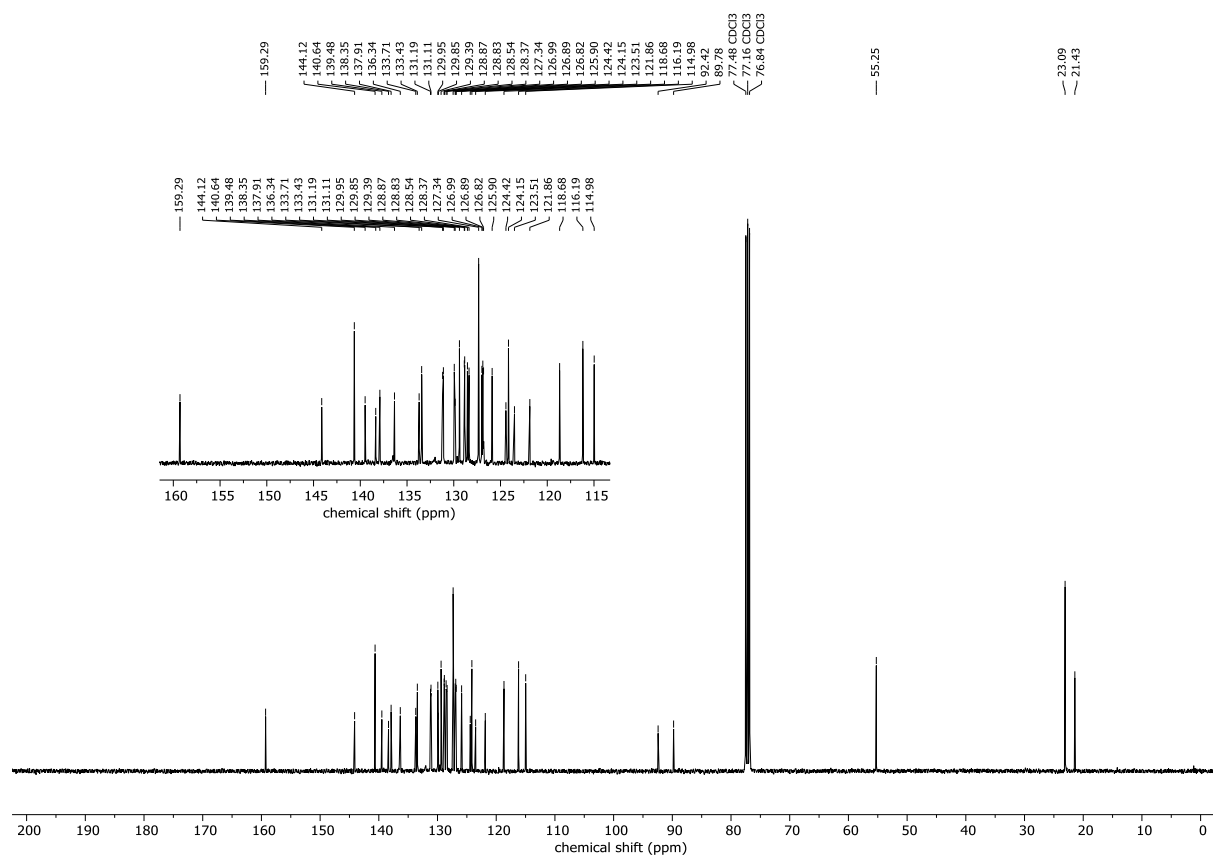

**$^{11}\text{B}$  NMR (161 MHz,  $\text{CDCl}_3$ )**

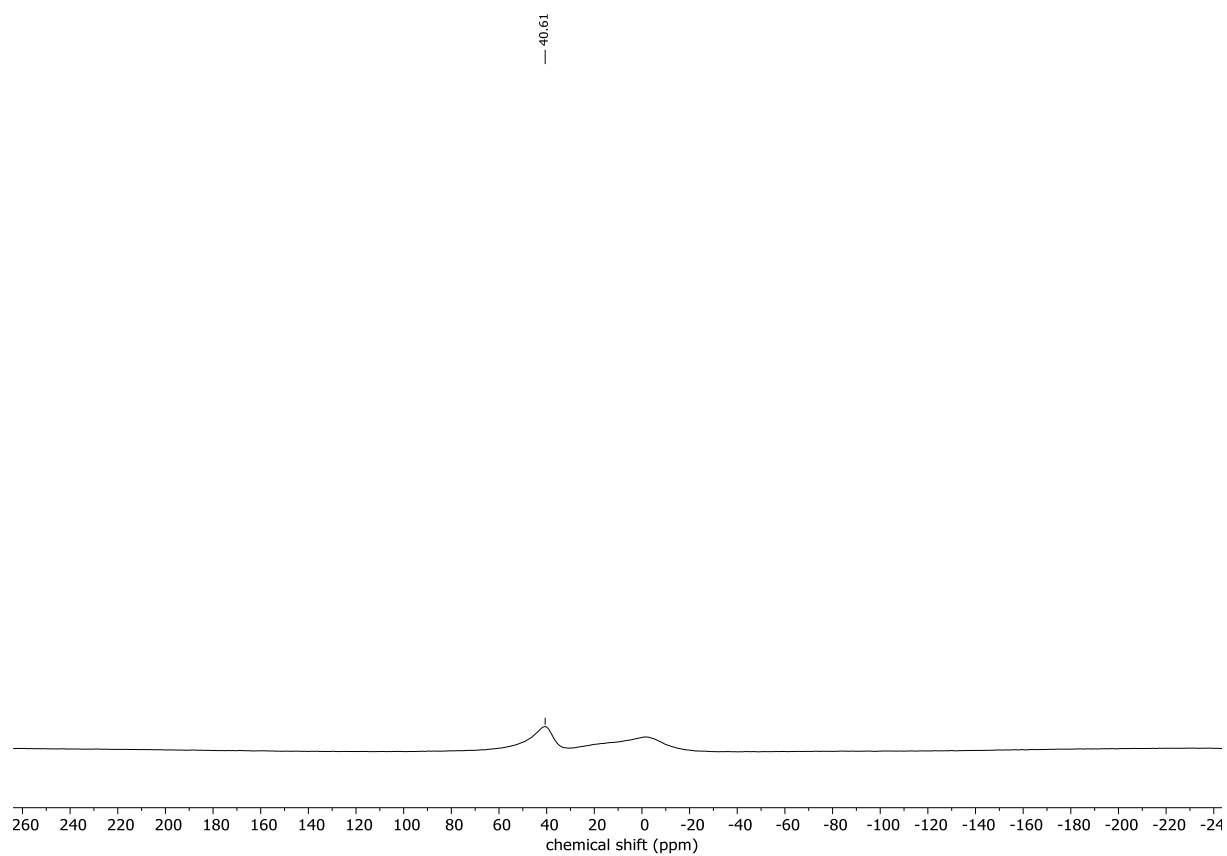

**<sup>1</sup>H NMR (300 MHz, CD<sub>2</sub>Cl<sub>2</sub>) S5b(BPh)**

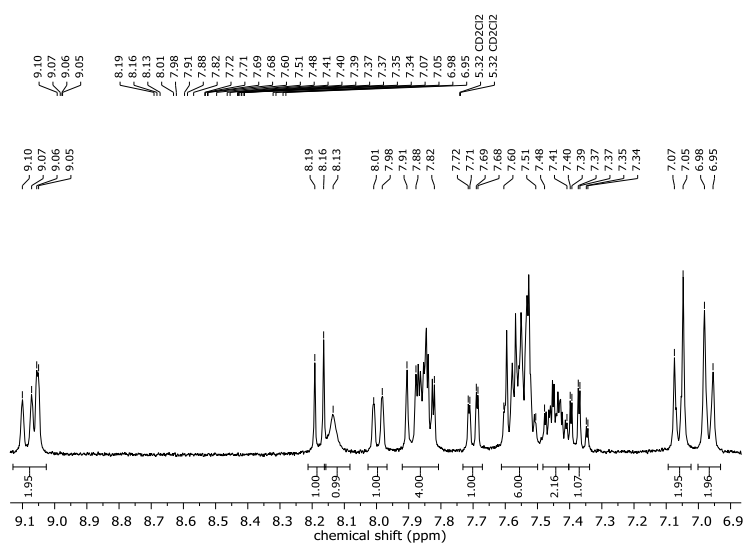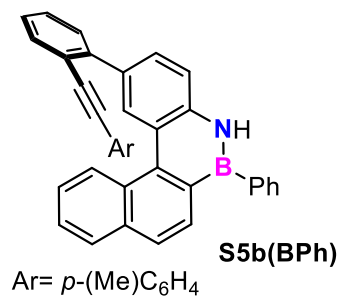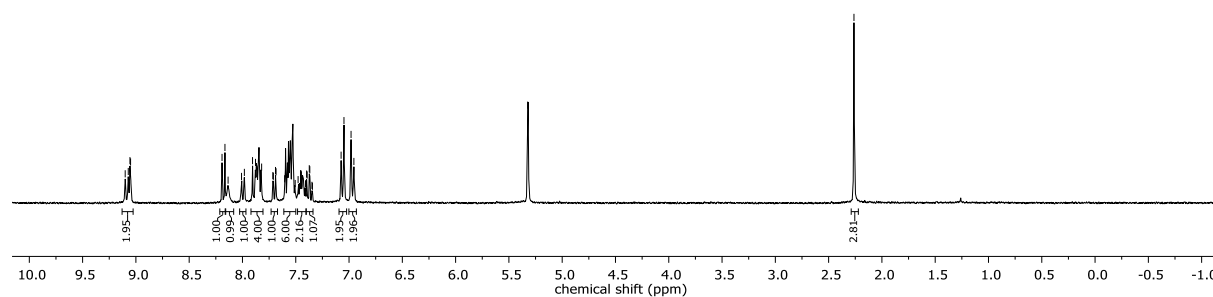

**<sup>13</sup>C NMR (101 MHz, CD<sub>2</sub>Cl<sub>2</sub>)**

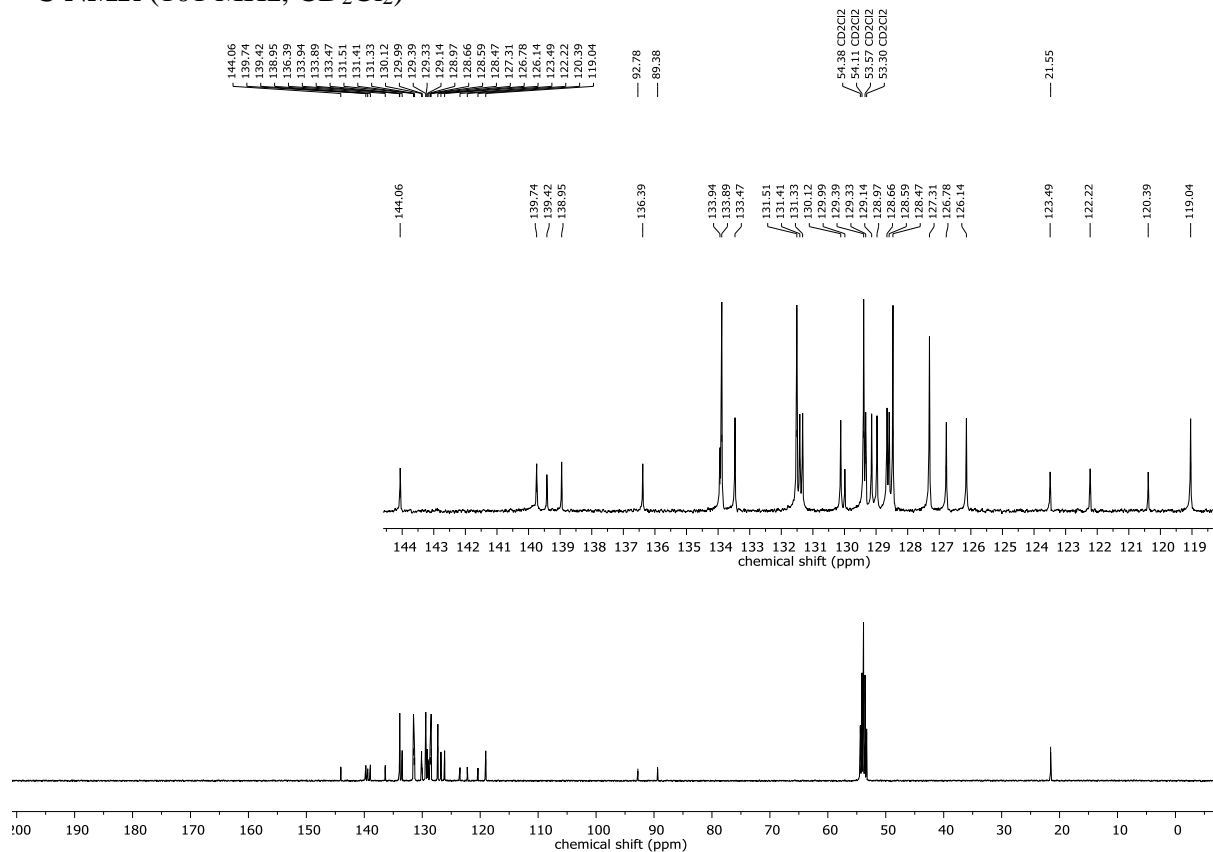

**$^{11}\text{B}$  NMR** (161 MHz,  $\text{CD}_2\text{Cl}_2$ )

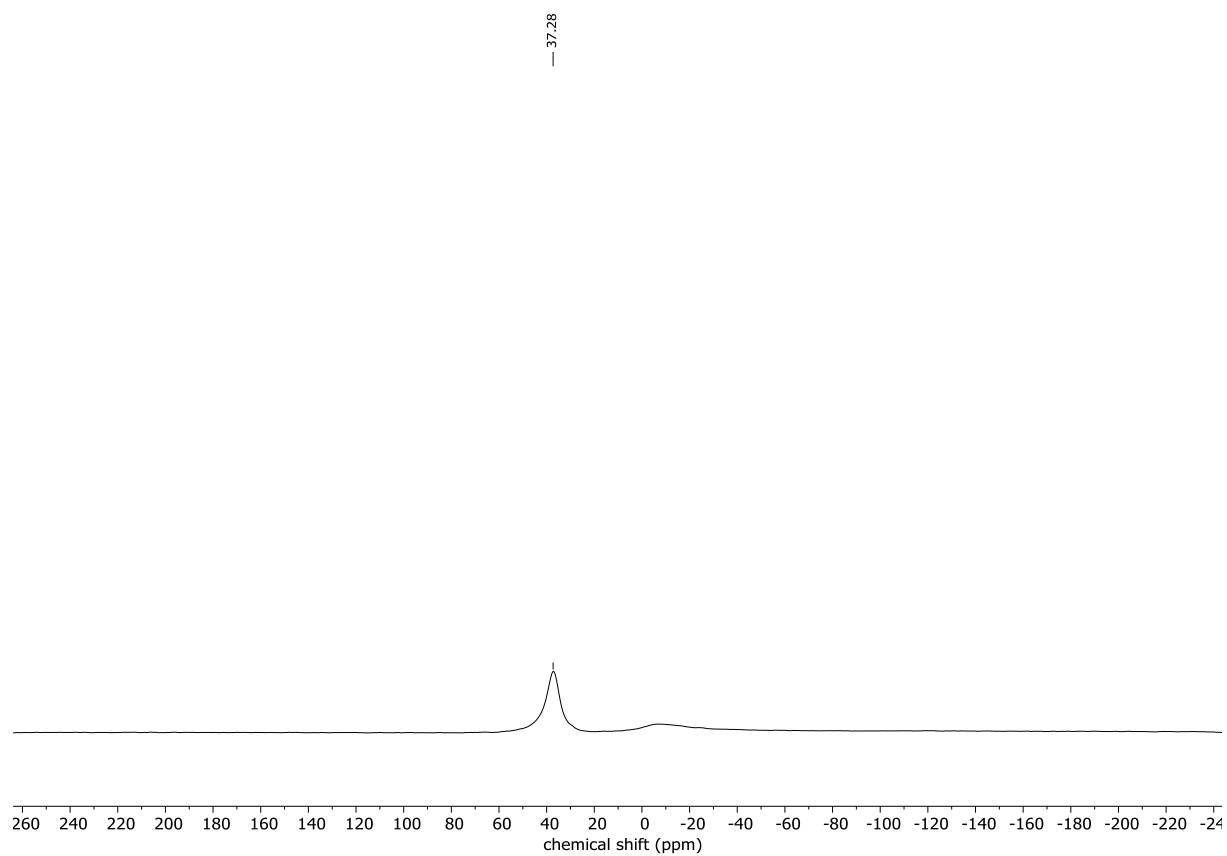

# <sup>1</sup>H NMR (600 MHz, CDCl<sub>3</sub>) S5b(NMe)

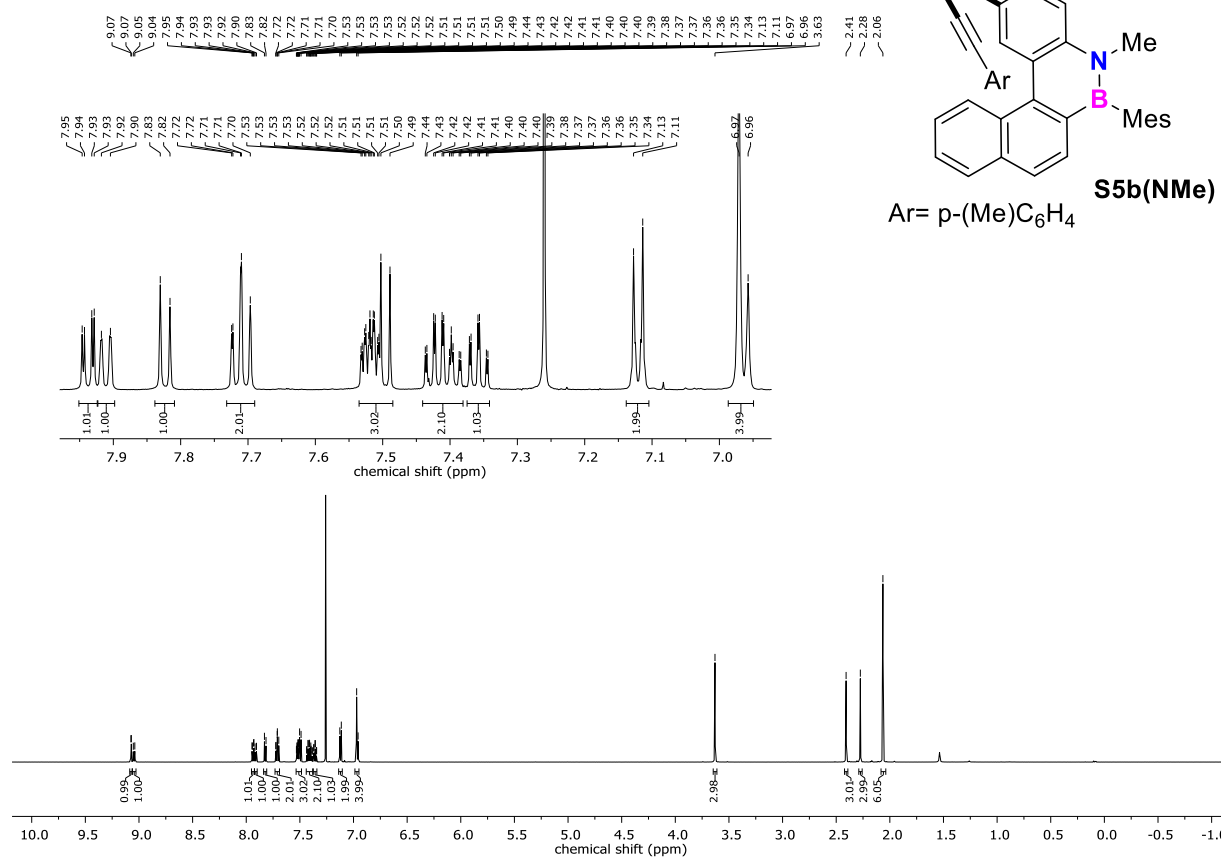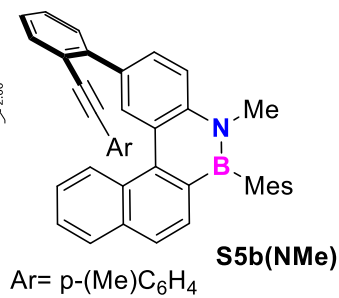

# <sup>13</sup>C NMR (101 MHz, CDCl<sub>3</sub>)

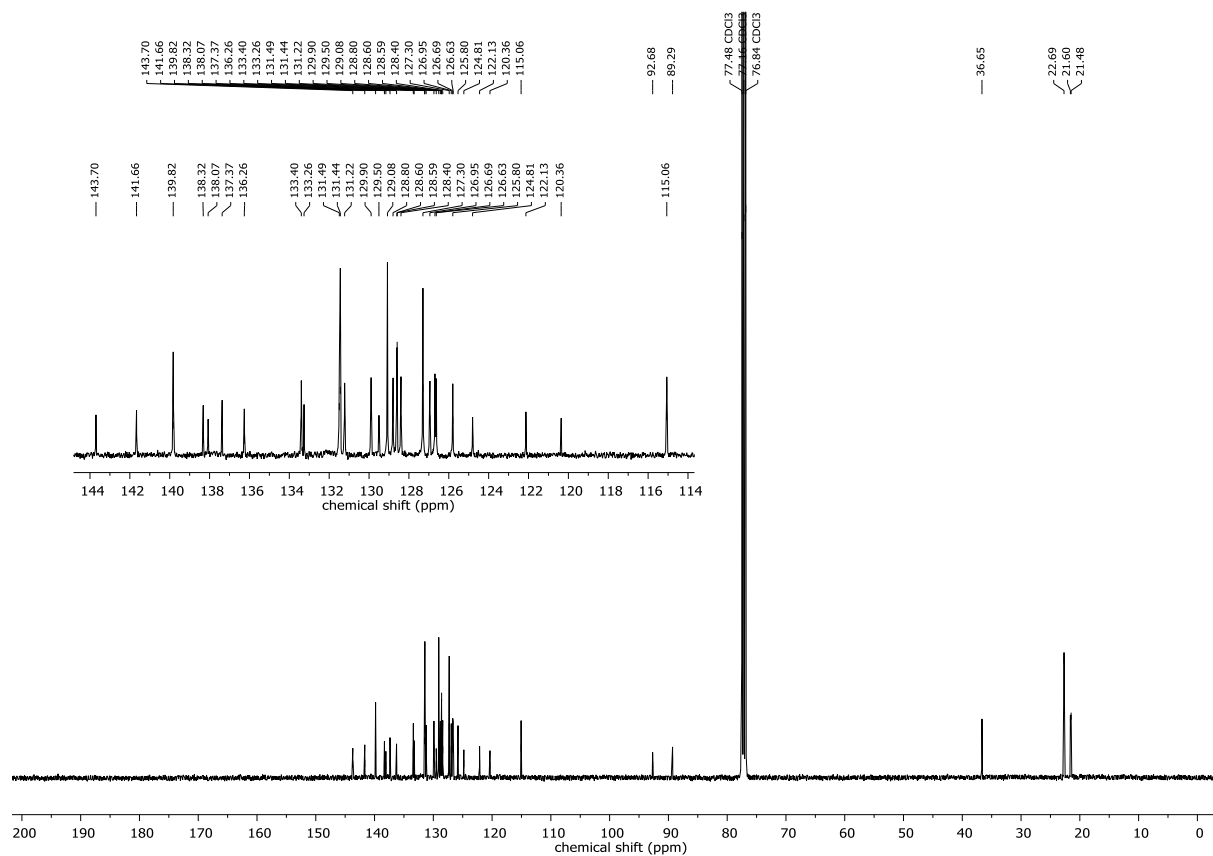

**$^{11}\text{B}$  NMR (161 MHz,  $\text{CDCl}_3$ )**

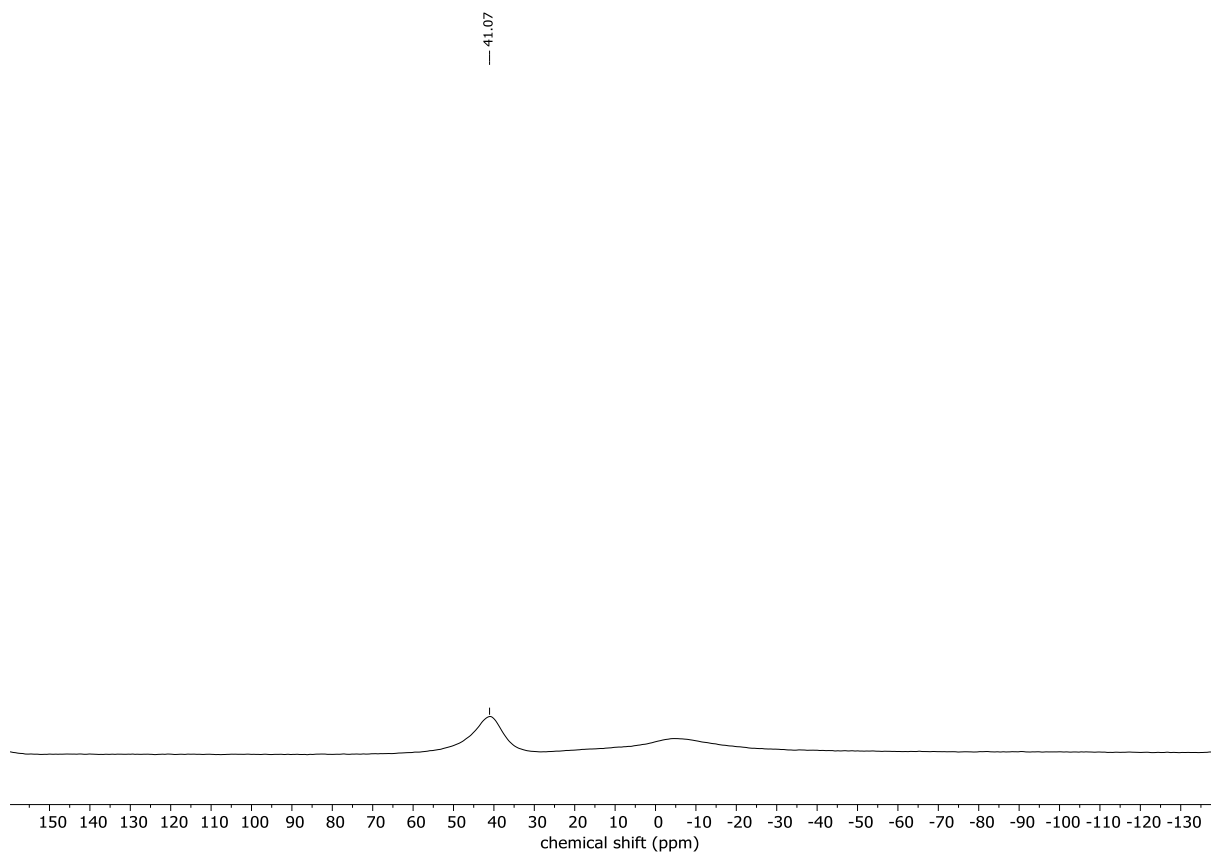

# <sup>1</sup>H NMR (400 MHz, CDCl<sub>3</sub>) **7b**

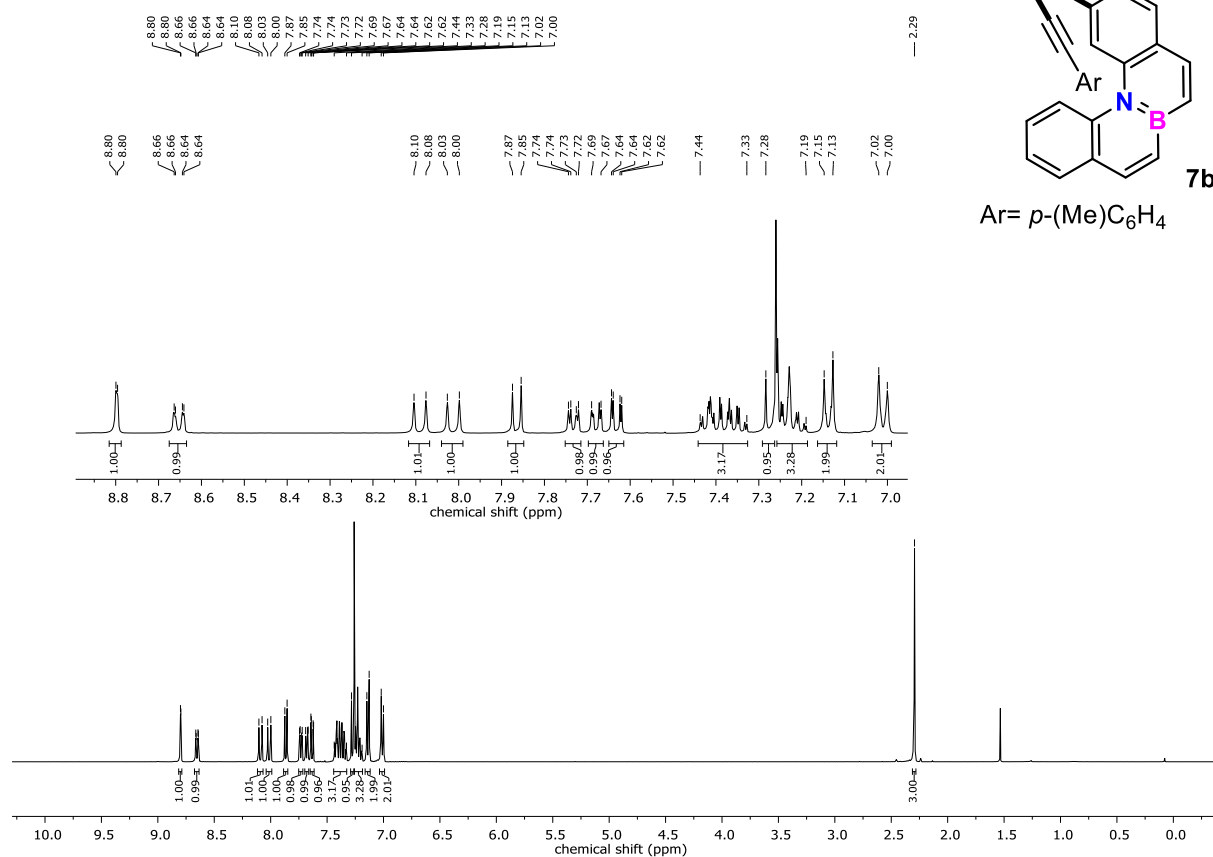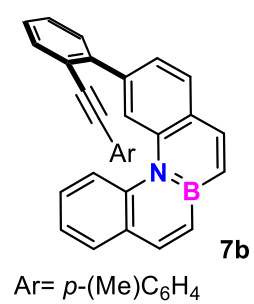

# <sup>13</sup>C NMR (101 MHz, CDCl<sub>3</sub>)

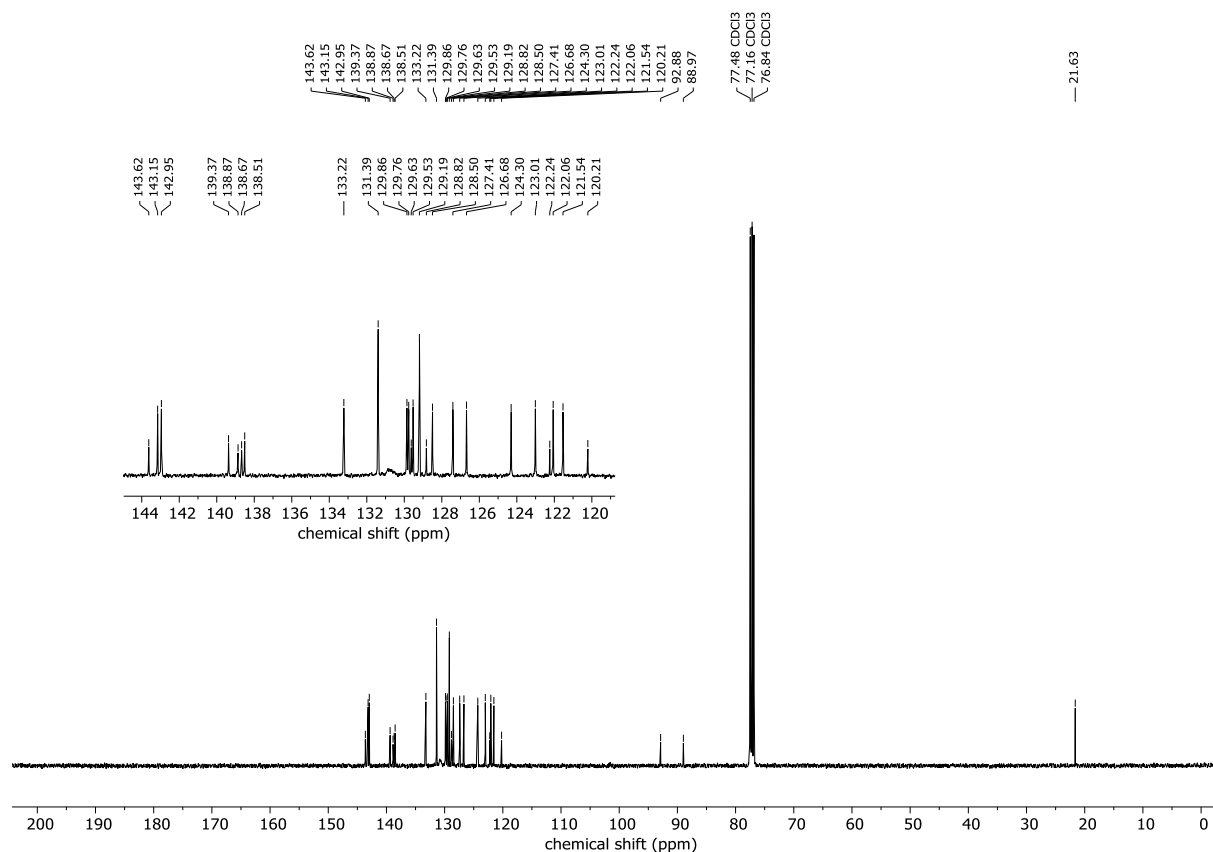

**$^{11}\text{B}$  NMR (161 MHz,  $\text{CDCl}_3$ )**

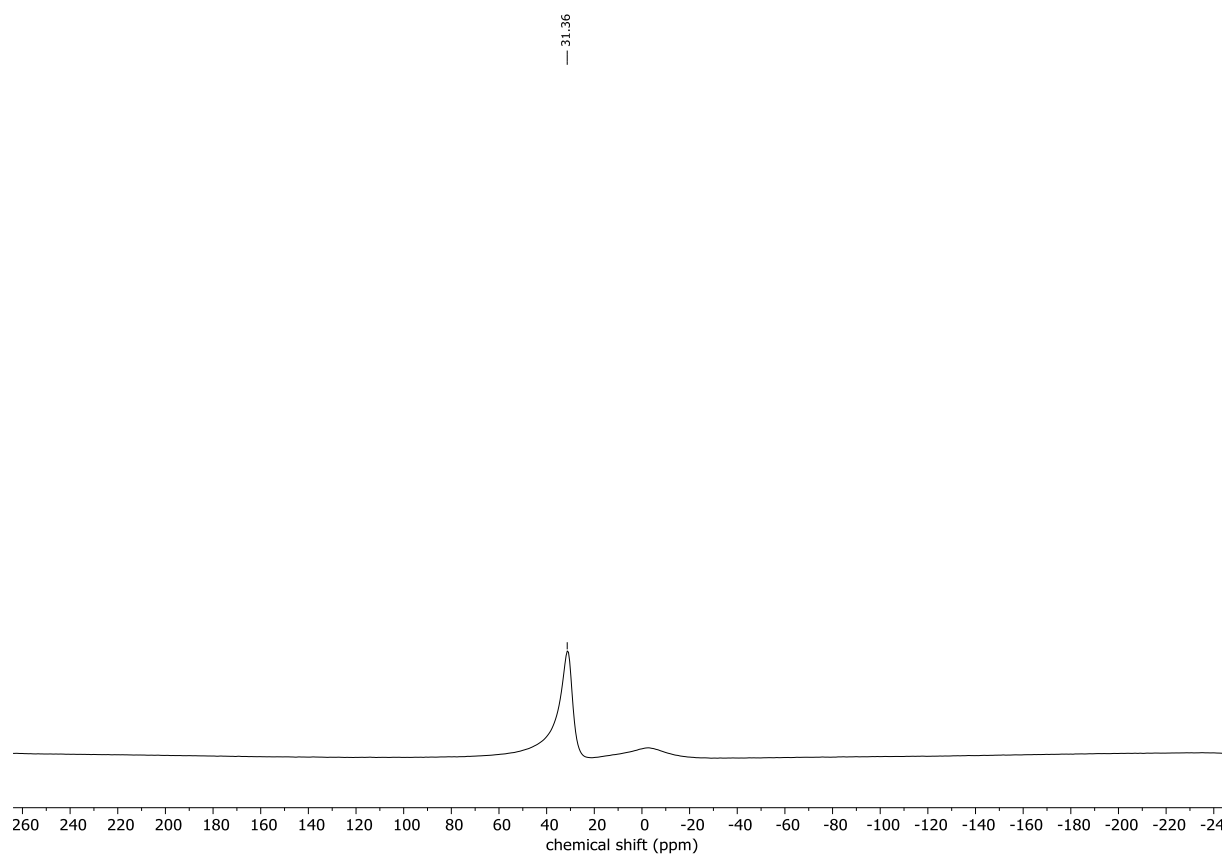

**<sup>1</sup>H NMR (400 MHz, CDCl<sub>3</sub>) 7c**

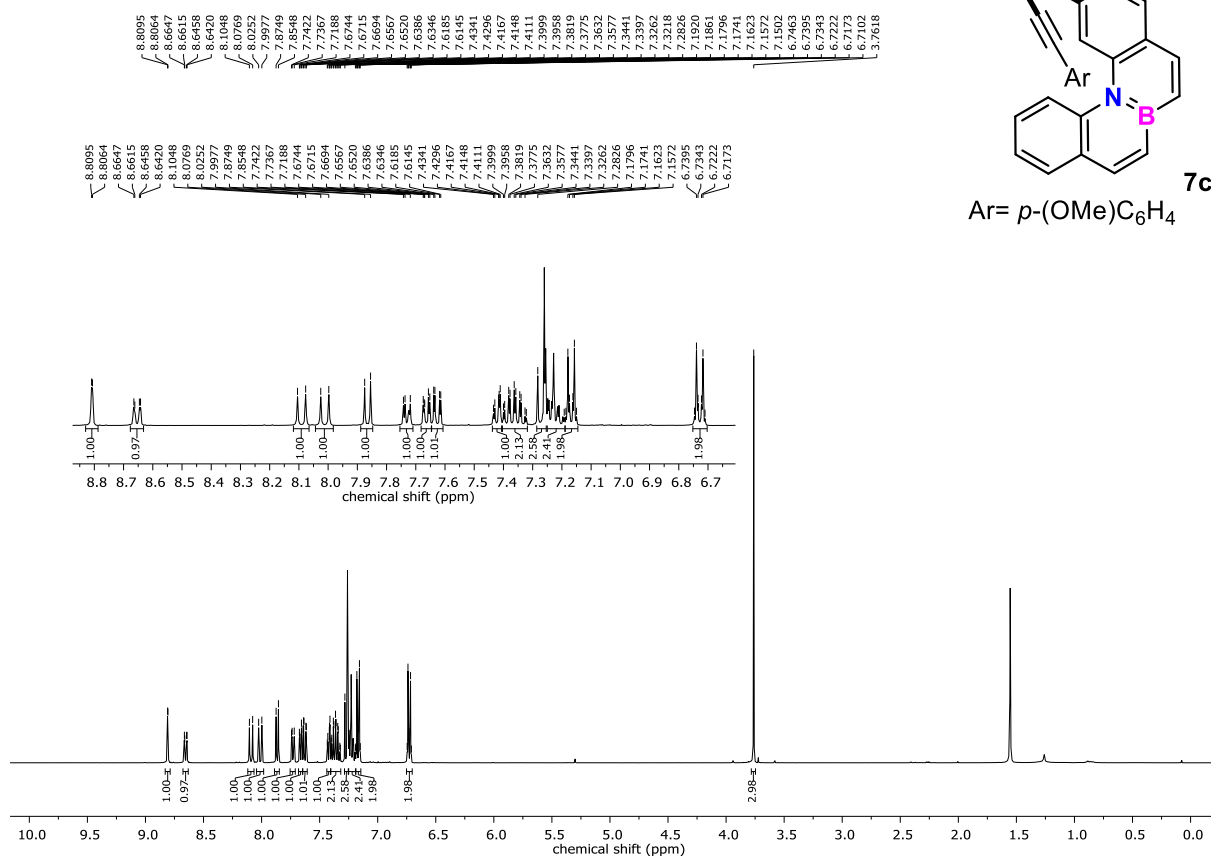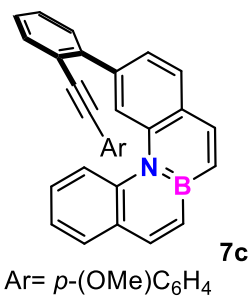

**<sup>13</sup>C NMR (101 MHz, CDCl<sub>3</sub>)**

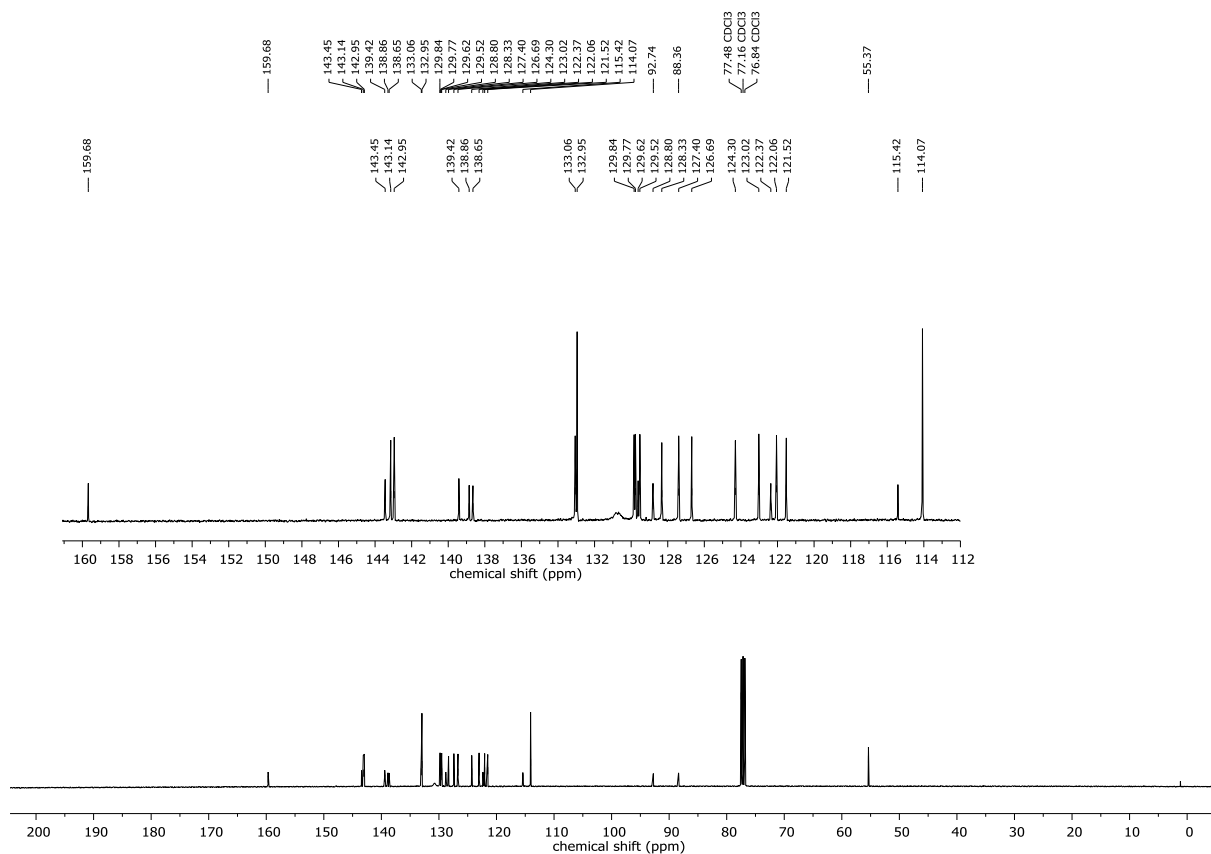

**$^{11}\text{B}$  NMR (128 MHz,  $\text{CDCl}_3$ )**

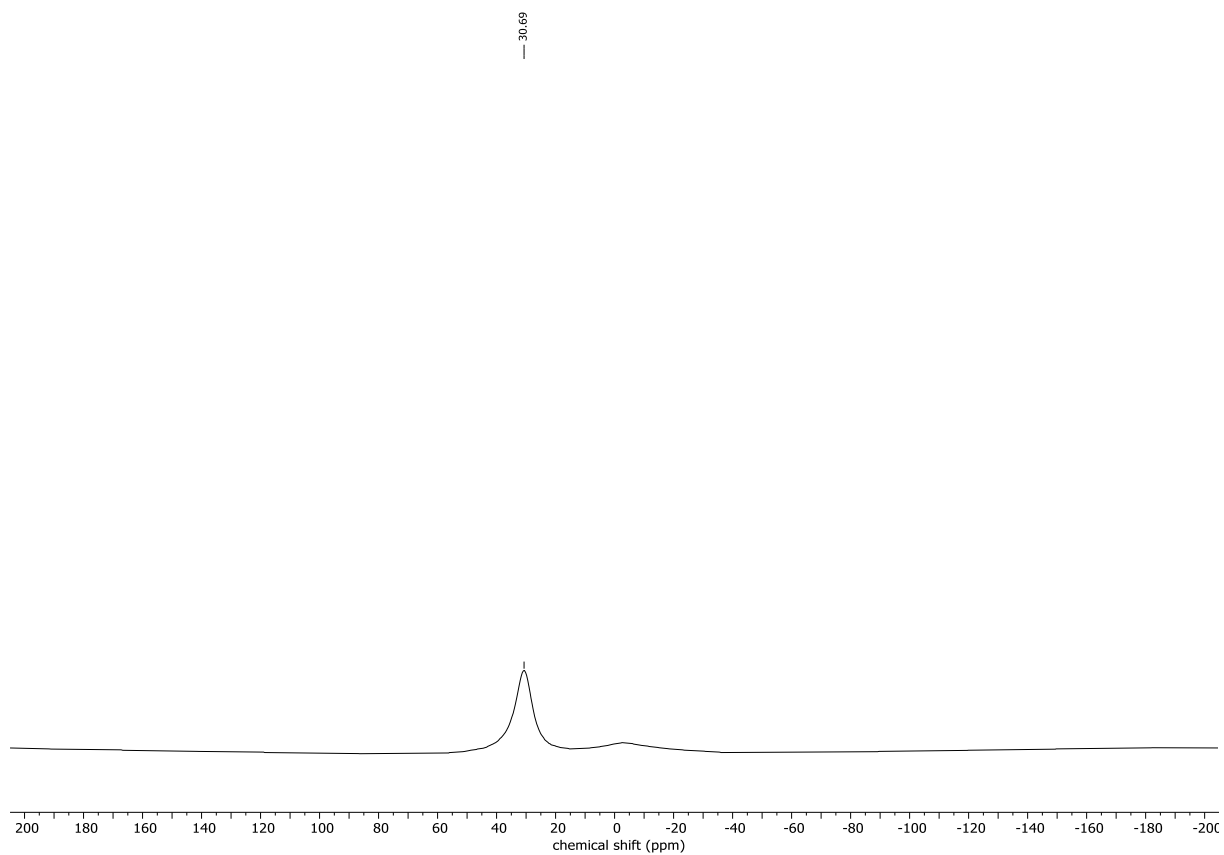

# <sup>1</sup>H NMR (400 MHz, CDCl<sub>3</sub>) 7e

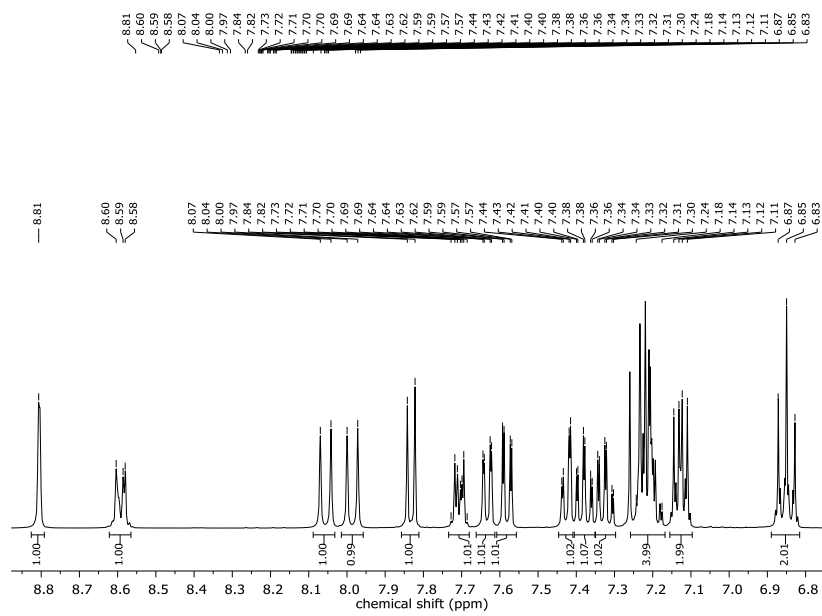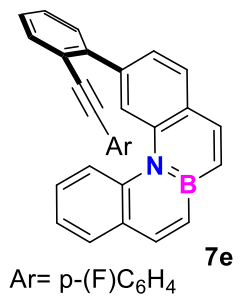

# <sup>13</sup>C NMR (101 MHz, CDCl<sub>3</sub>)

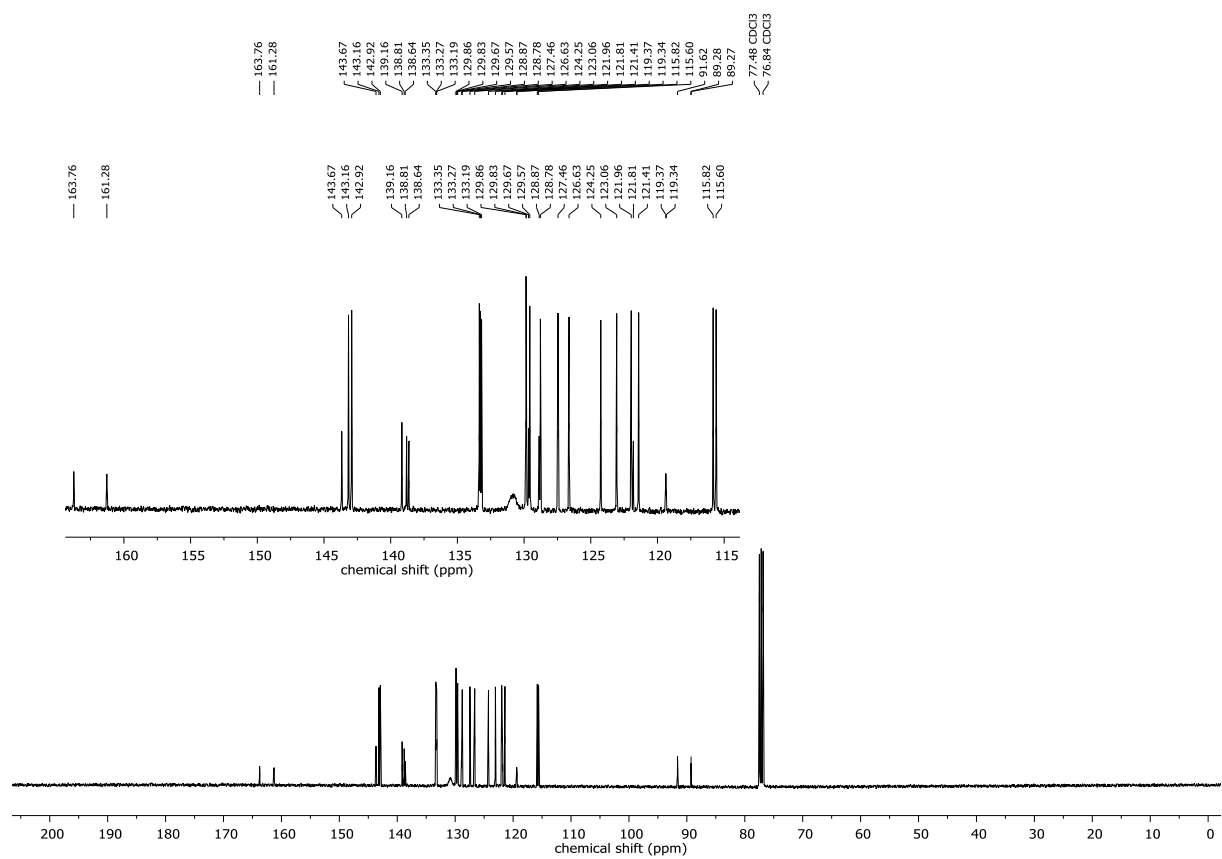

**$^{11}\text{B}$  NMR (161 MHz,  $\text{CDCl}_3$ )**

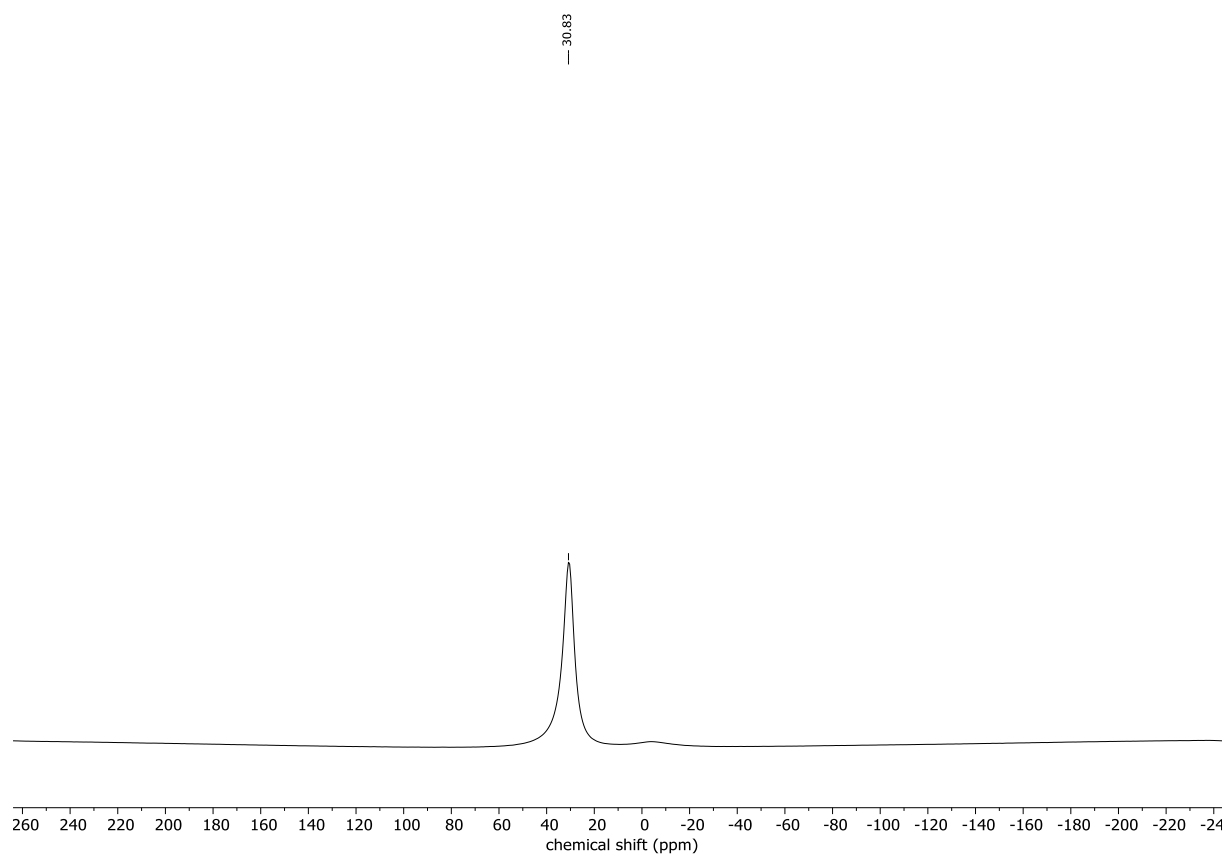

**$^{19}\text{F}$  NMR (282 MHz,  $\text{CDCl}_3$ )**

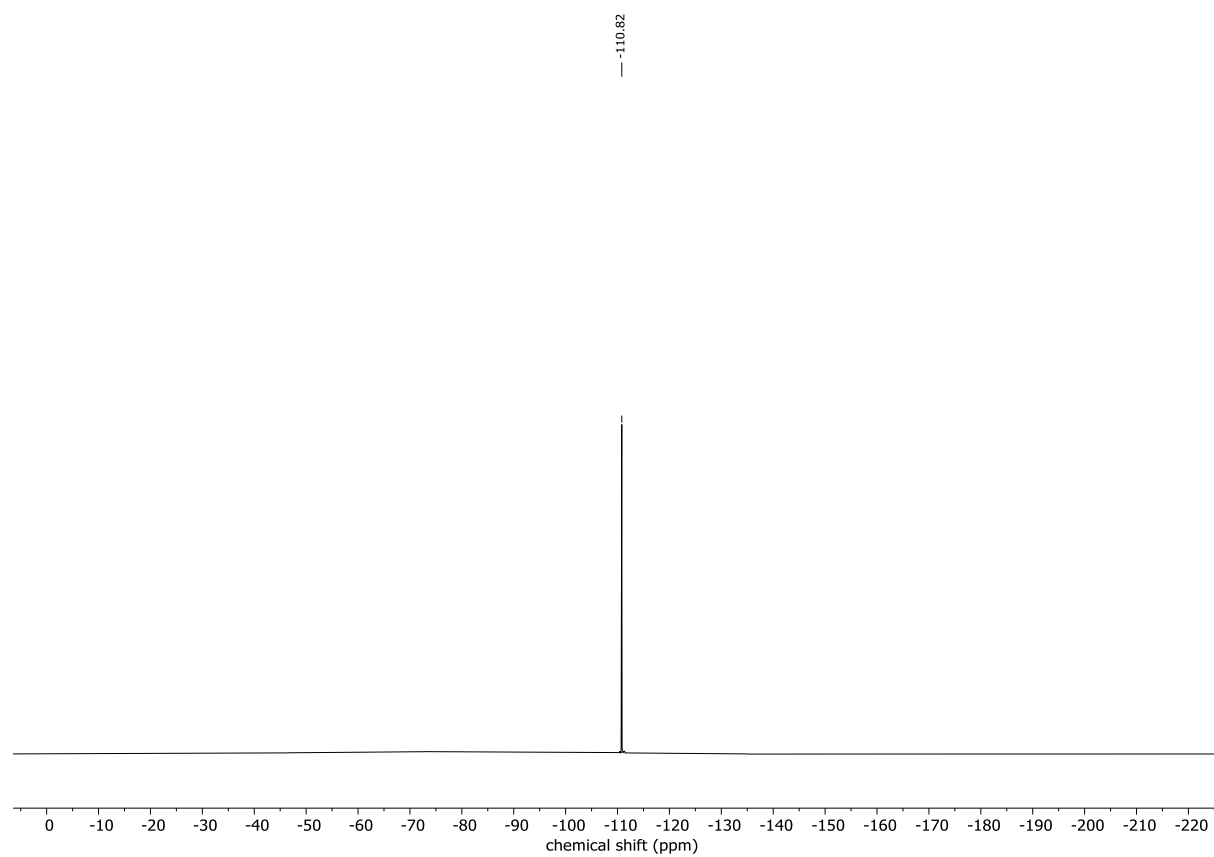

# <sup>1</sup>H NMR (400 MHz, CDCl<sub>3</sub>) 7h

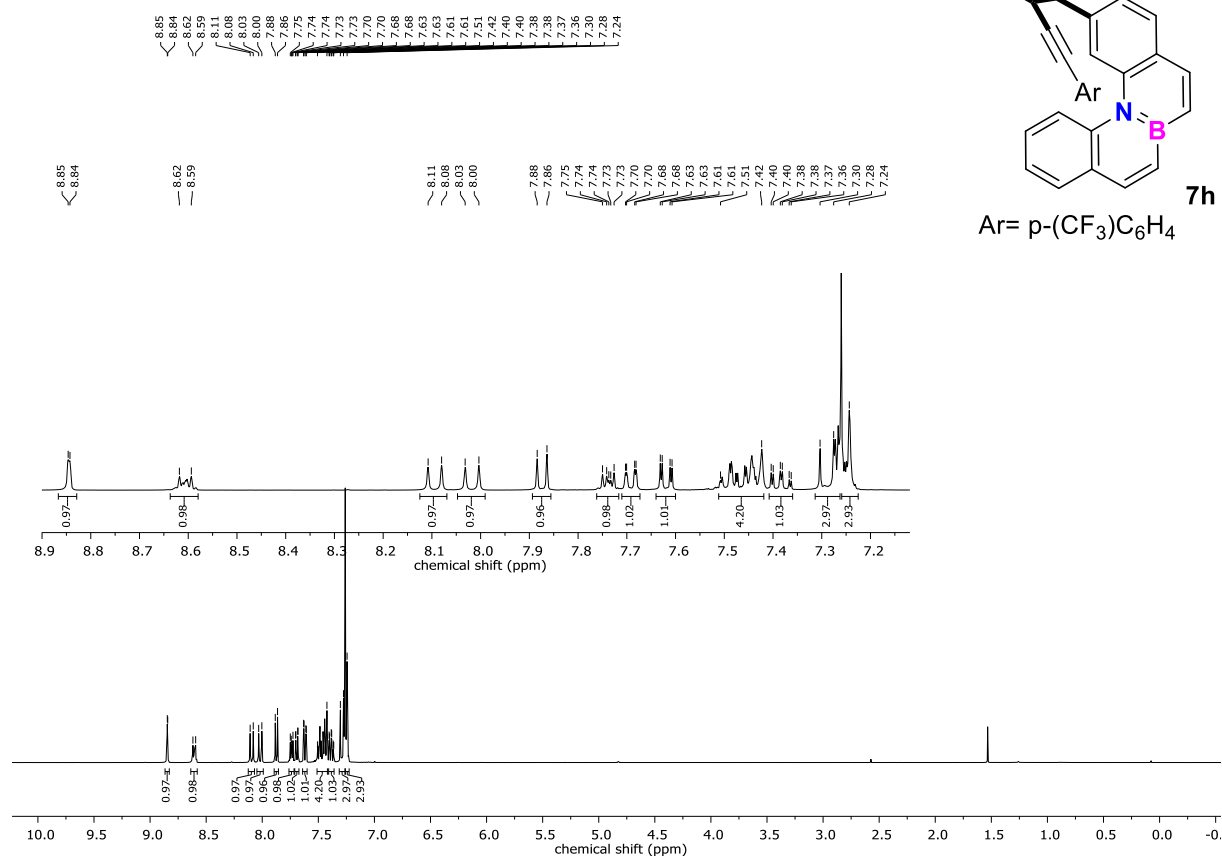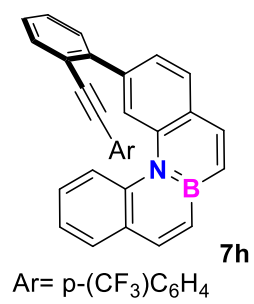

# <sup>13</sup>C NMR (126 MHz, CDCl<sub>3</sub>)

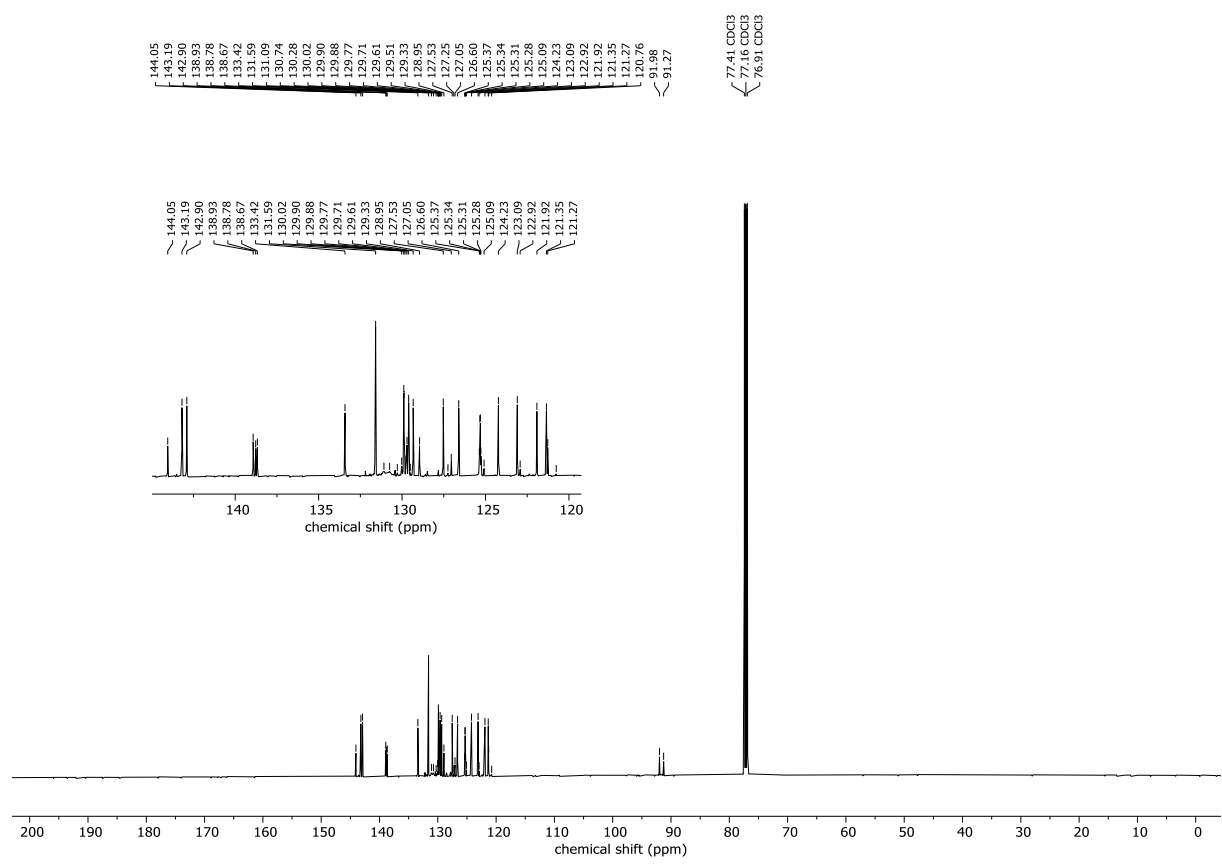

**$^{11}\text{B}$  NMR (161 MHz,  $\text{CDCl}_3$ )**

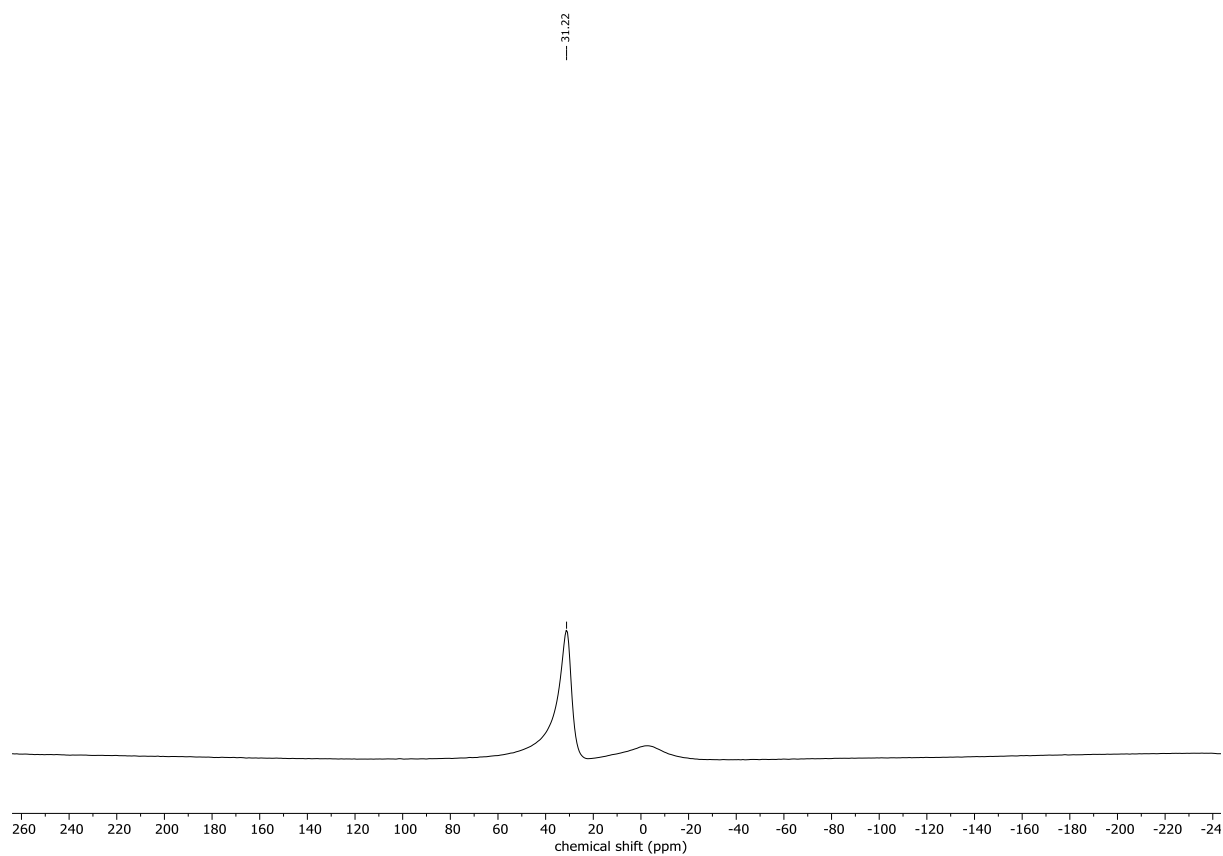

**$^{19}\text{F}$  NMR (377 MHz,  $\text{CDCl}_3$ )**

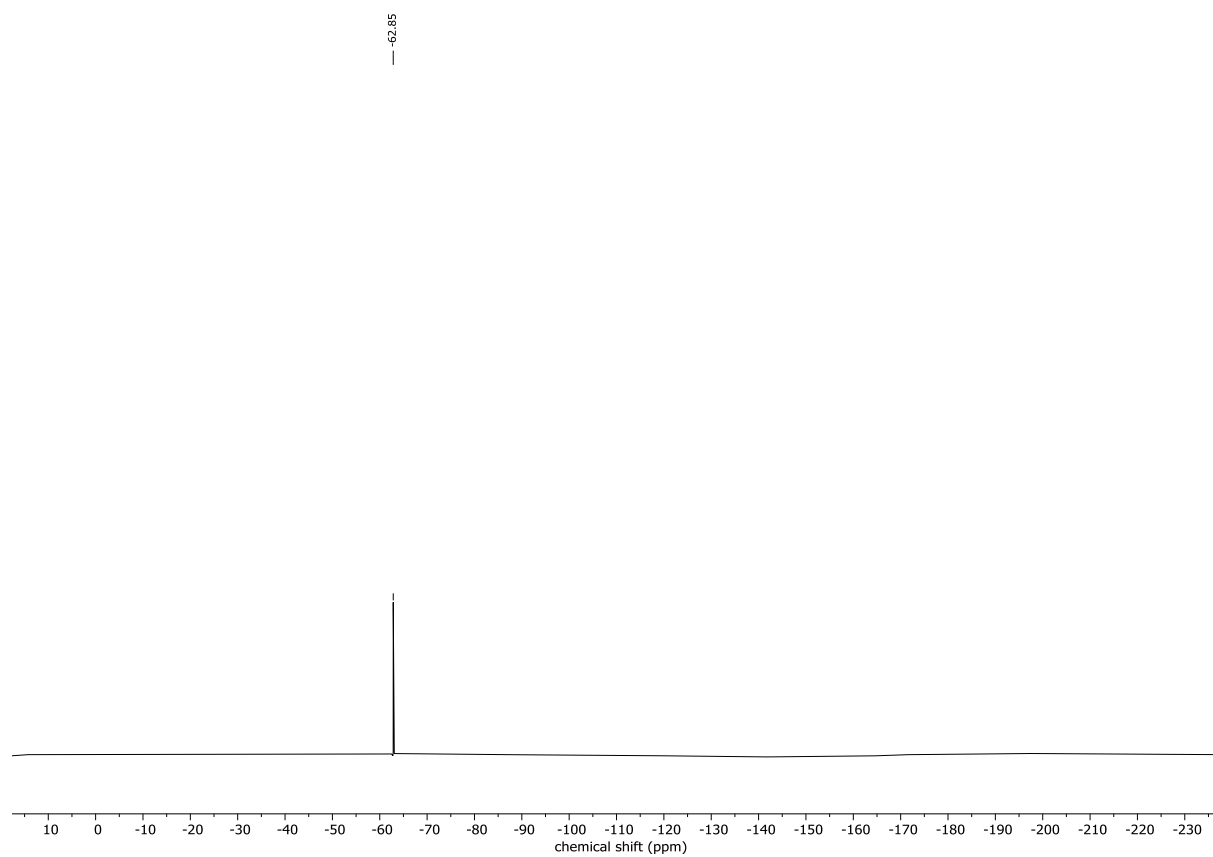

# $^1\text{H}$ NMR (500 MHz, $\text{CD}_2\text{Cl}_2$ , $-35\text{ }^\circ\text{C}$ ) 1a

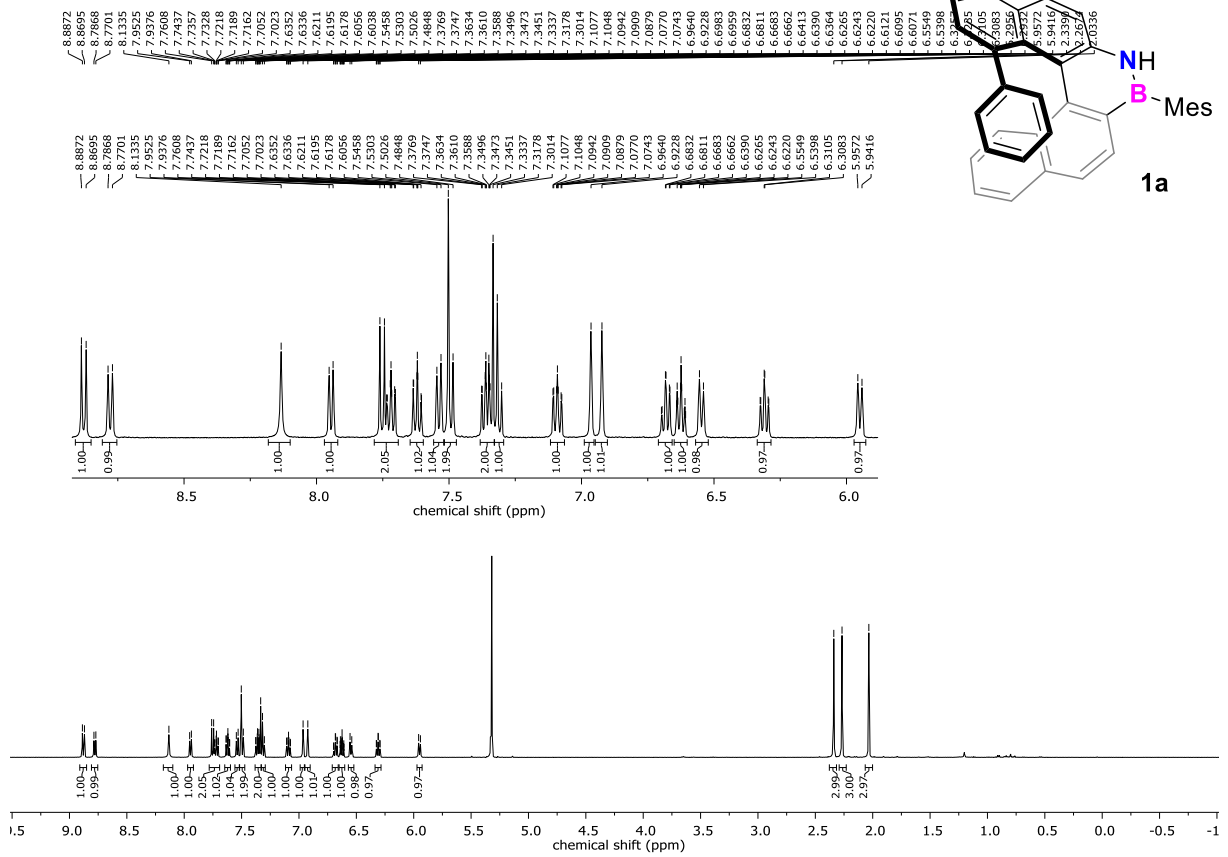

**$^{13}\text{C}$  NMR (126 MHz,  $\text{CD}_2\text{Cl}_2$ ,  $-35^\circ\text{C}$ )**

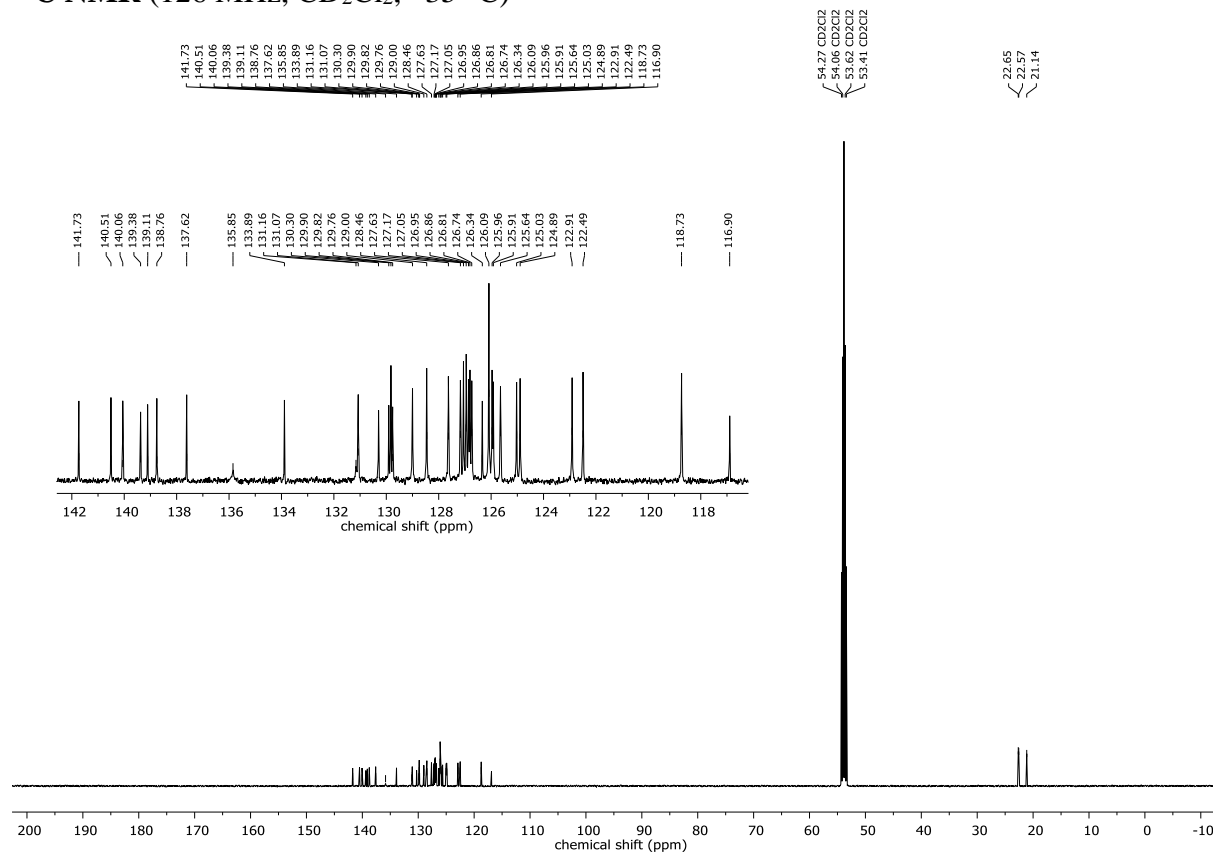

**$^{11}\text{B}$  NMR (161 MHz,  $\text{CD}_2\text{Cl}_2$ )**

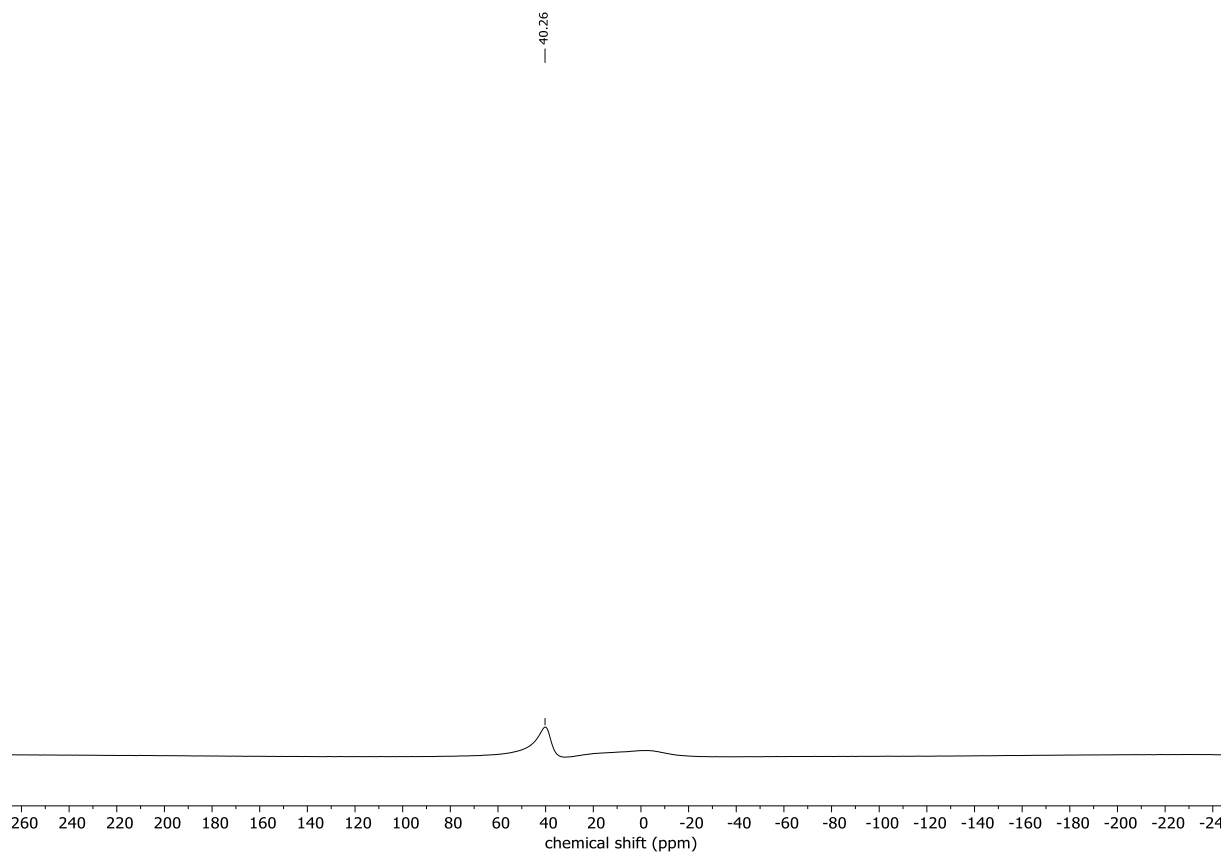

**<sup>1</sup>H NMR (600 MHz, CD<sub>2</sub>Cl<sub>2</sub>, -35°C) 1b**

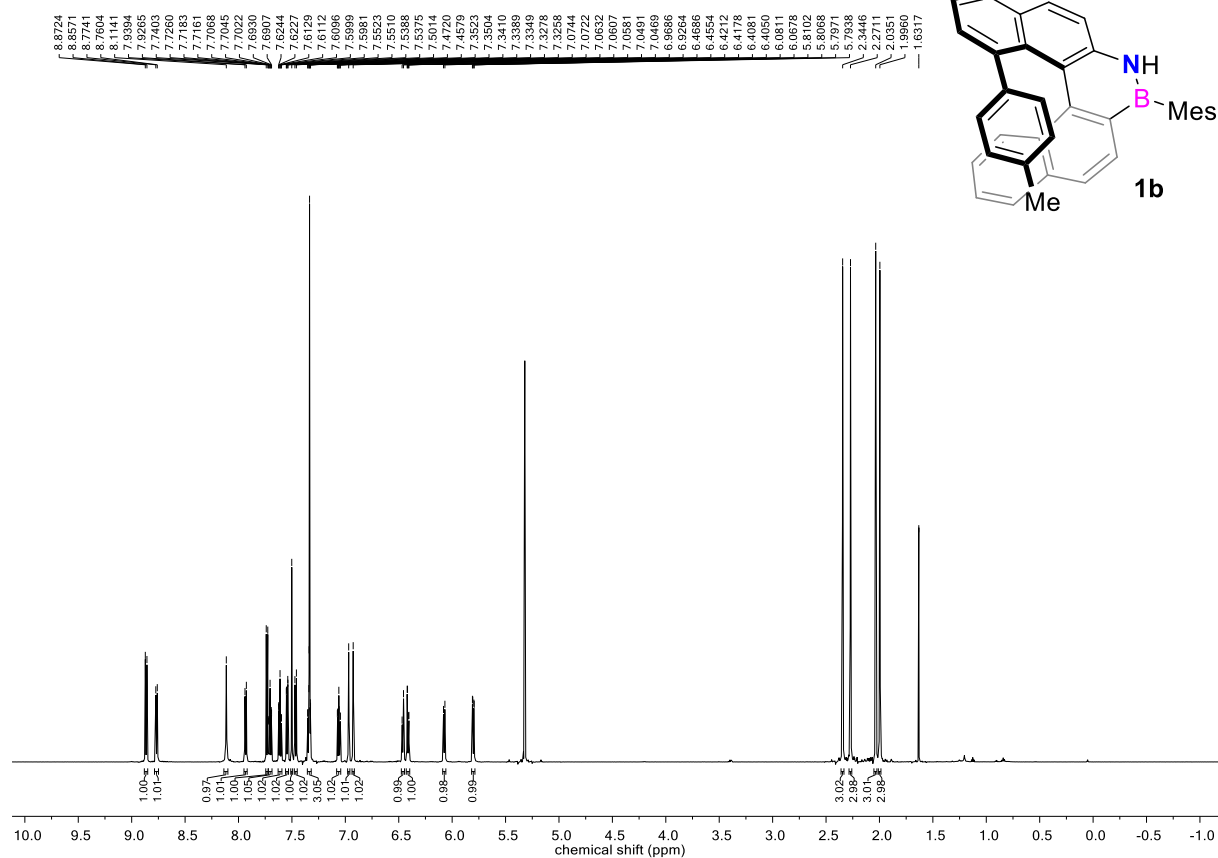

**<sup>1</sup>H NMR (300 MHz, CD<sub>2</sub>Cl<sub>2</sub>; rt)**

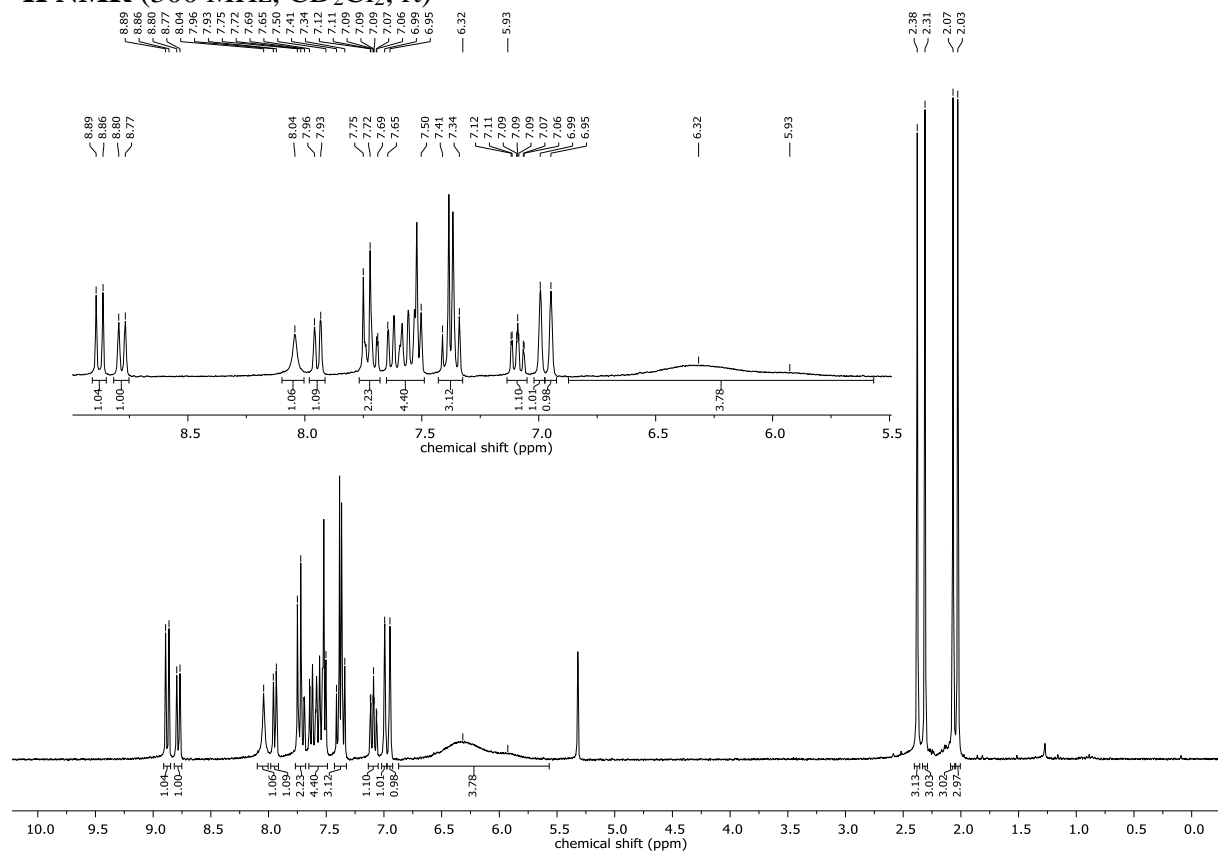

**$^{13}\text{C}$  NMR (151 MHz,  $\text{CD}_2\text{Cl}_2$ ,  $-35^\circ\text{C}$ )**

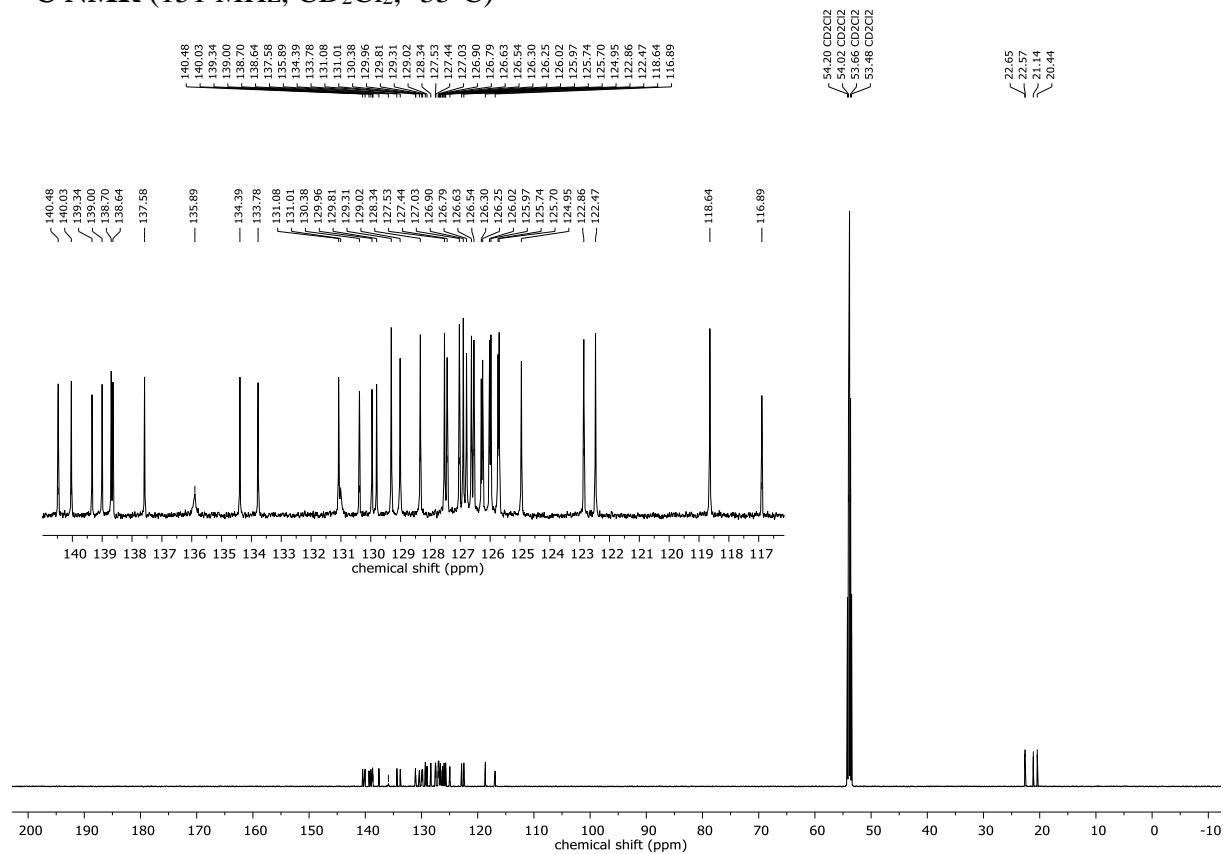

**$^{11}\text{B}$  NMR (161 MHz,  $\text{CD}_2\text{Cl}_2$ )**

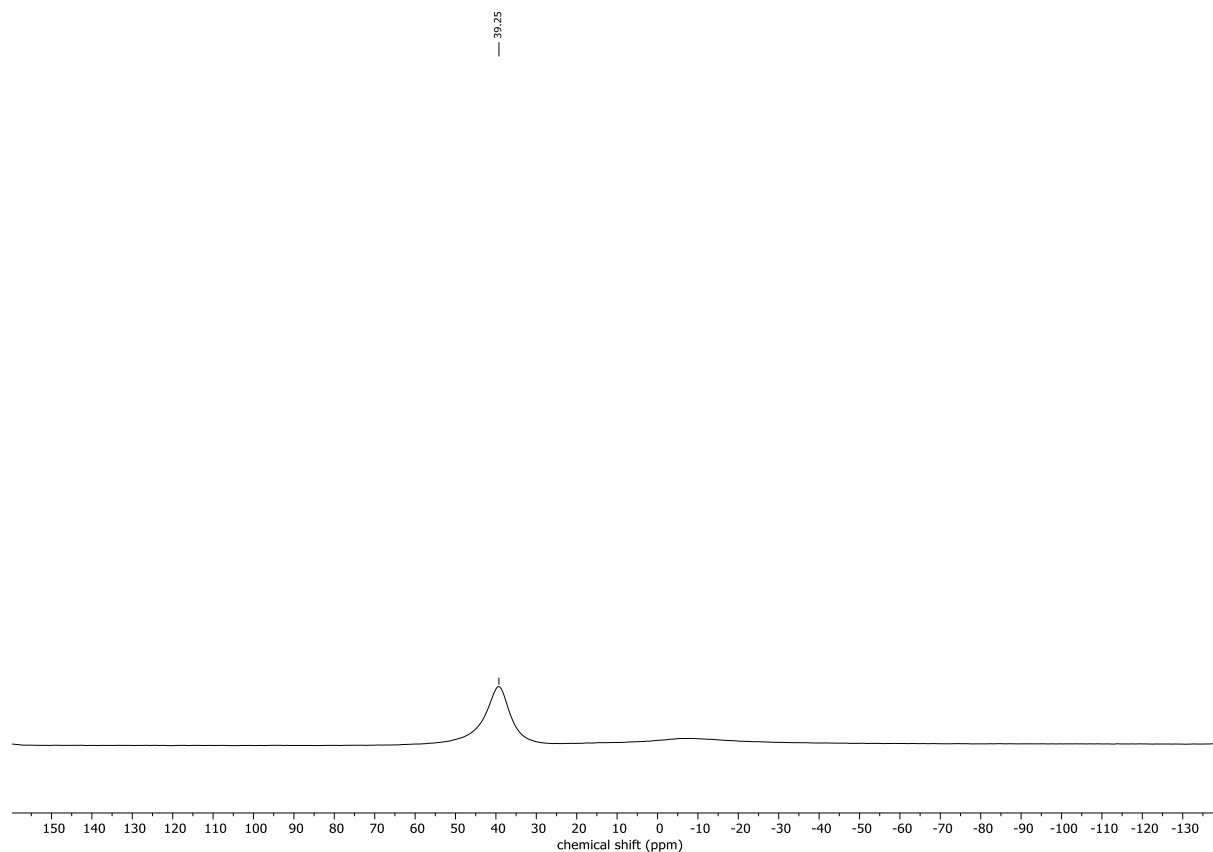



**$^{13}\text{C}$  NMR (151 MHz,  $\text{CD}_2\text{Cl}_2$ ,  $-35^\circ\text{C}$ )**

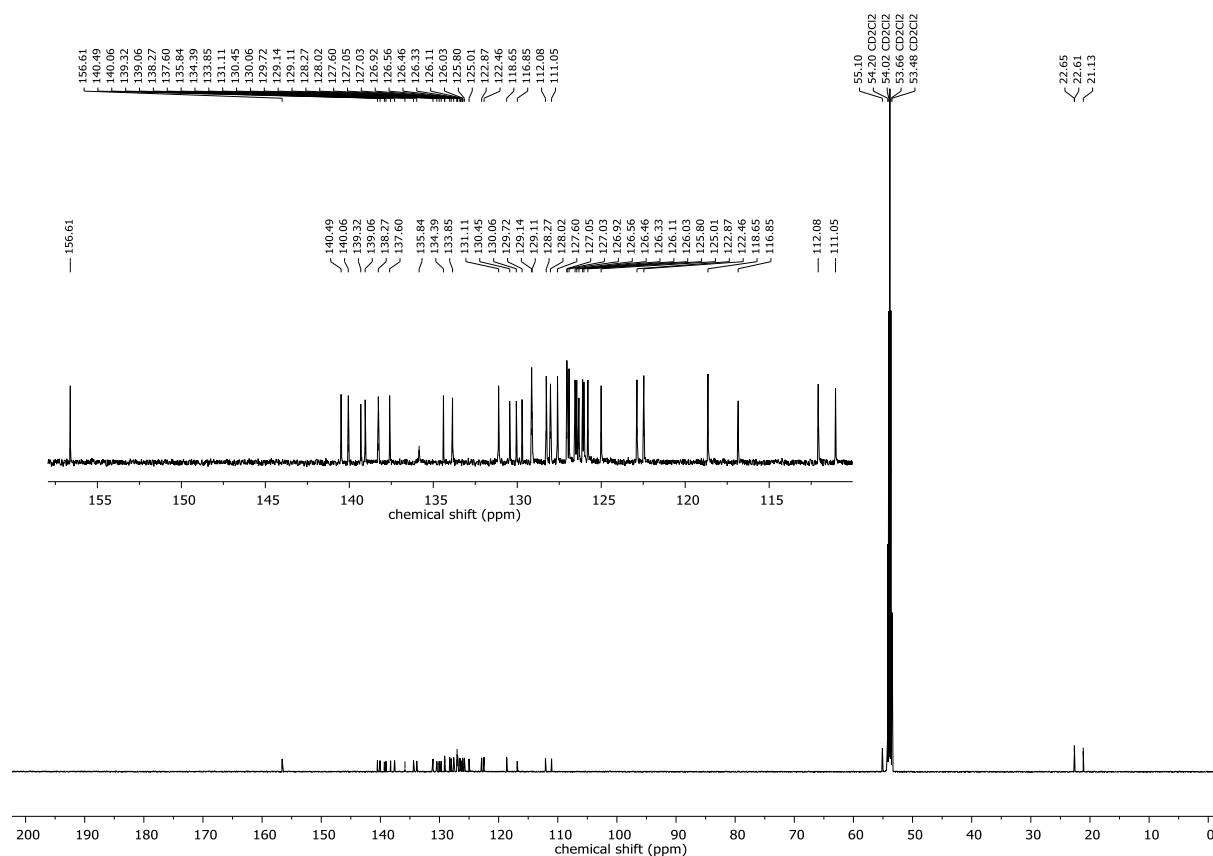

**$^{11}\text{B}$  NMR (161 MHz,  $\text{CD}_2\text{Cl}_2$ )**

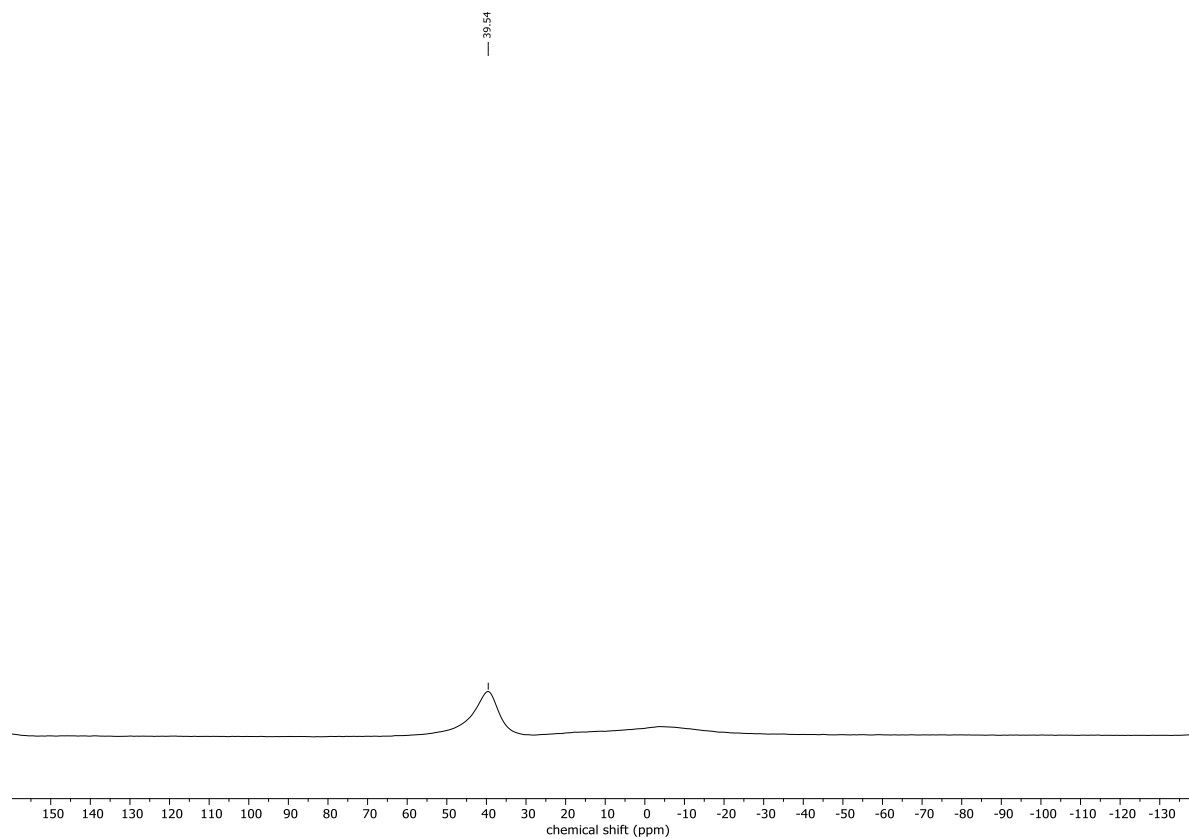

**<sup>1</sup>H NMR (500 MHz, THF, -35°C) 1d**

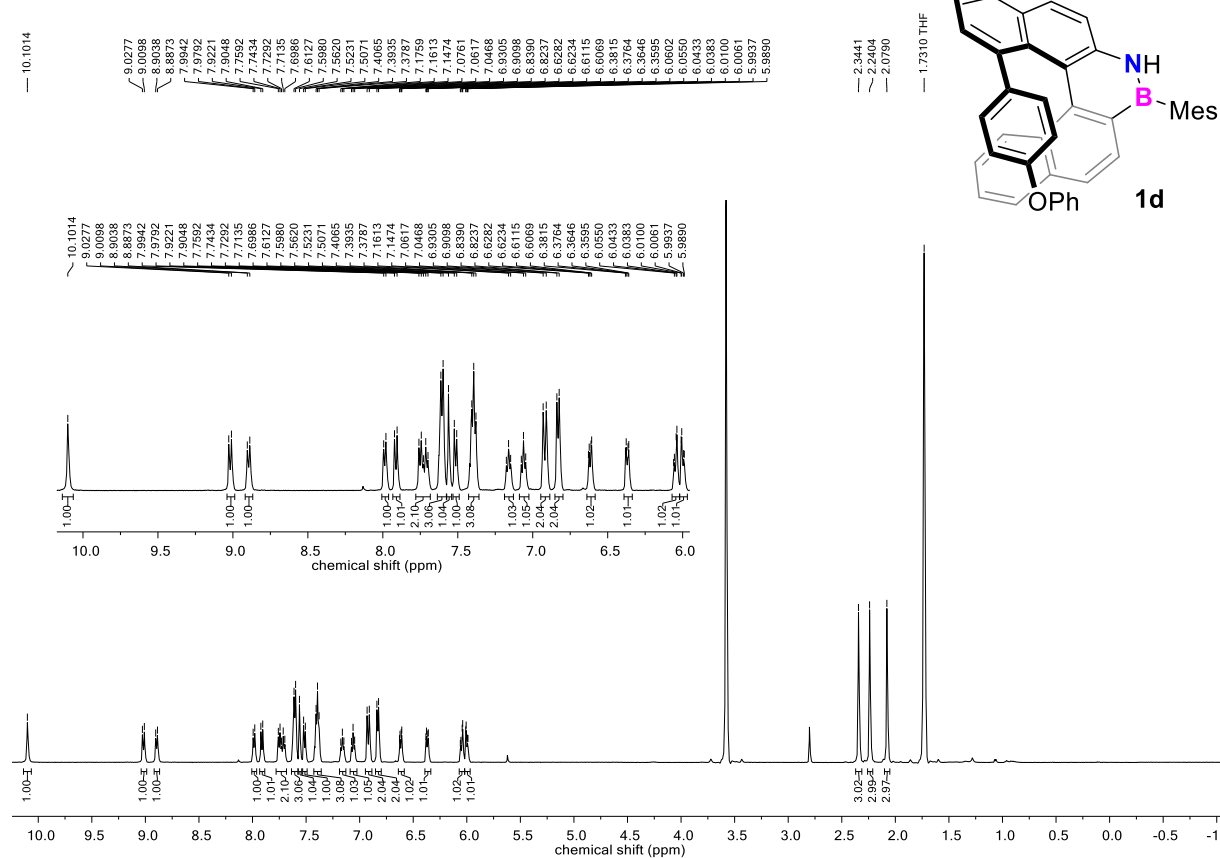

**<sup>1</sup>H NMR (400 MHz, THF; rt)**

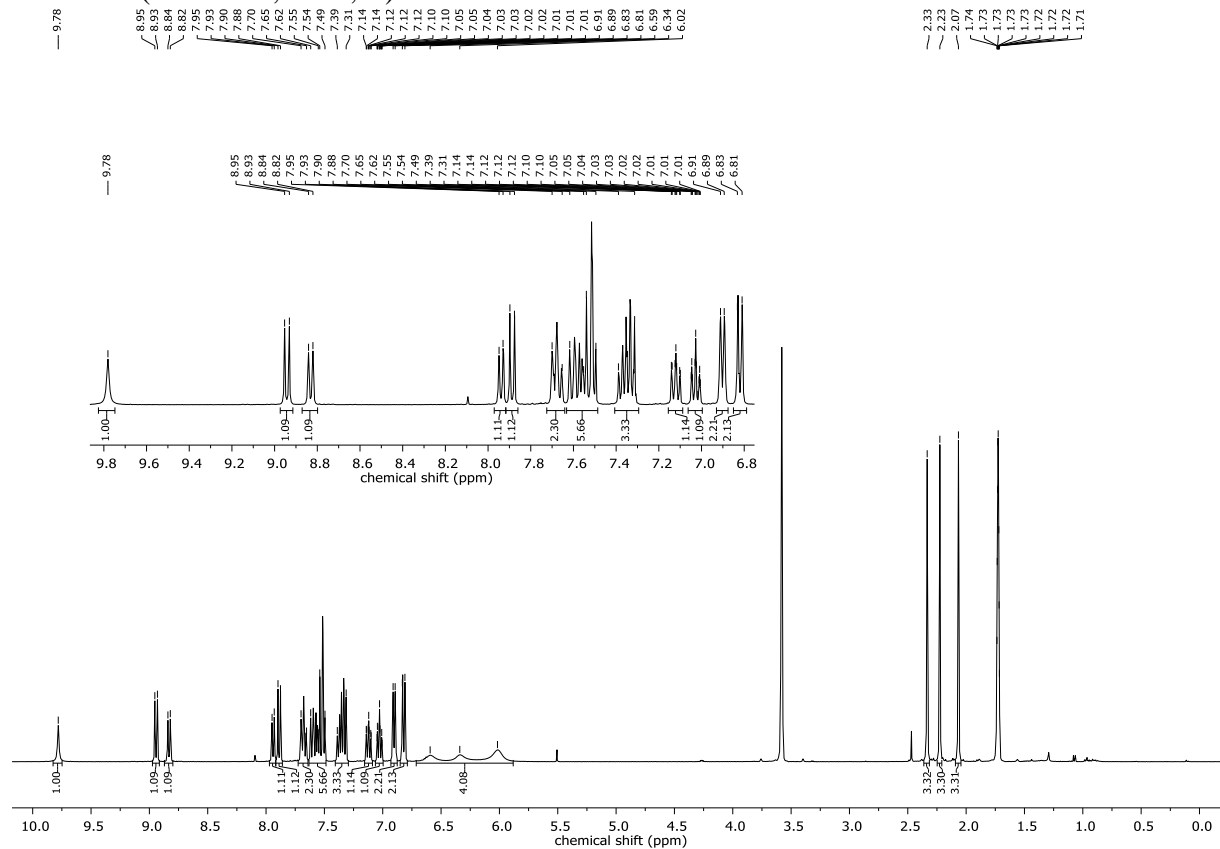

### $^{13}\text{C}$ NMR (126 MHz, THF, $-35^\circ\text{C}$ )

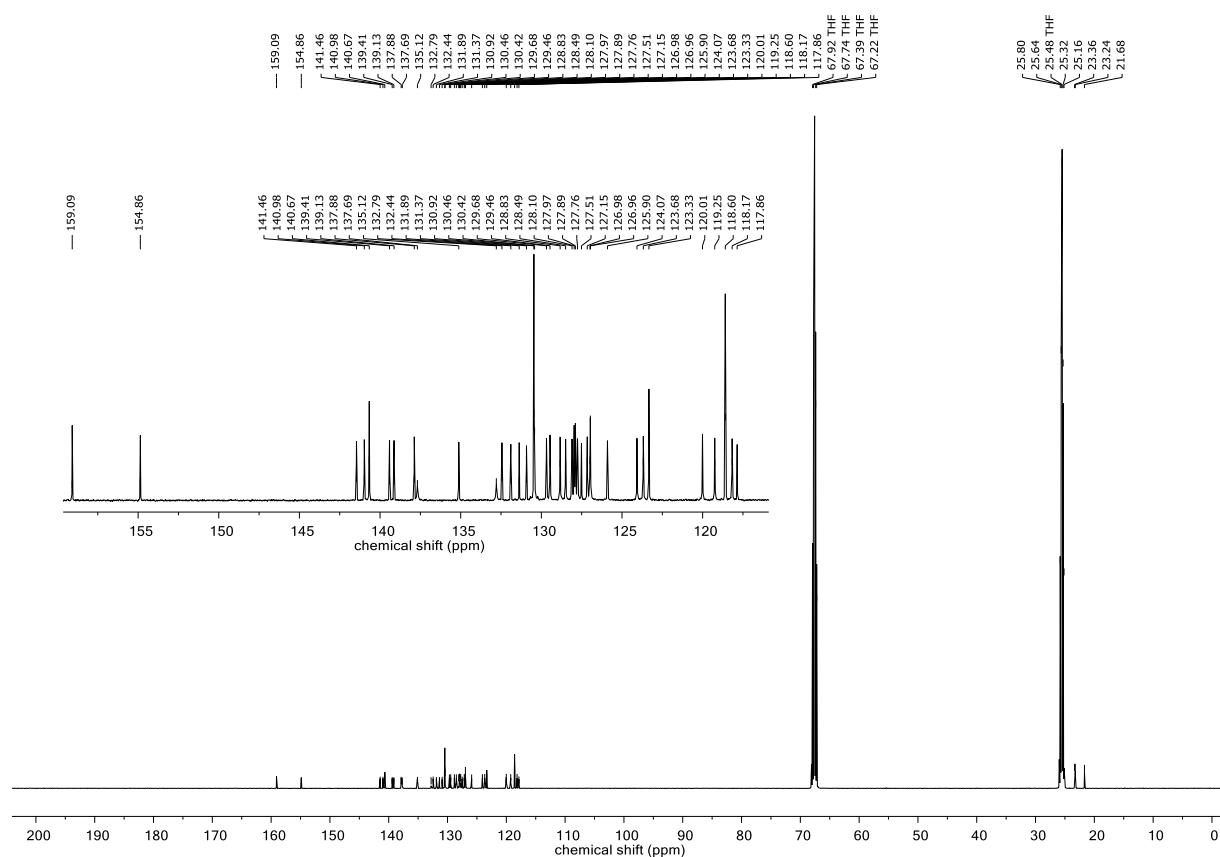

### $^{11}\text{B}$ NMR (161 MHz, THF)

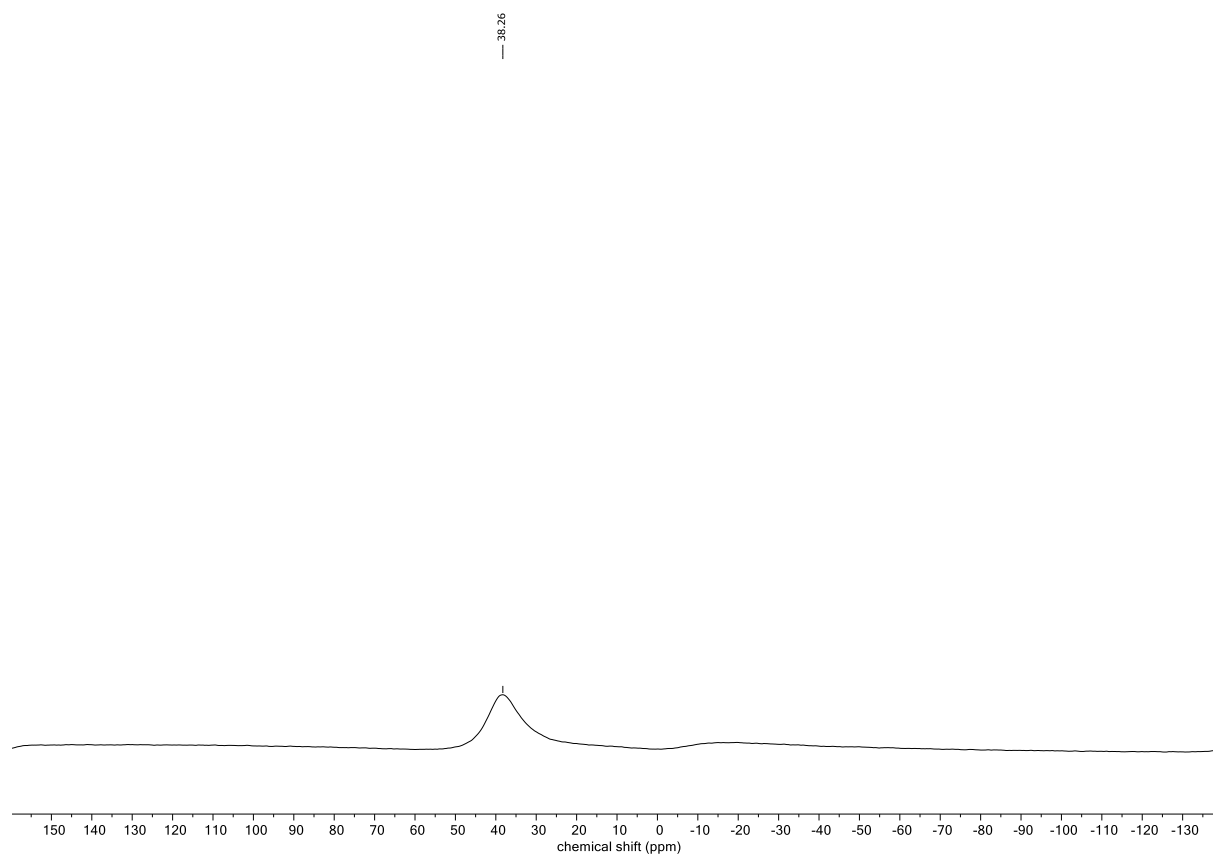



**<sup>13</sup>C NMR (151 MHz, CD<sub>2</sub>Cl<sub>2</sub>, -35°C)**

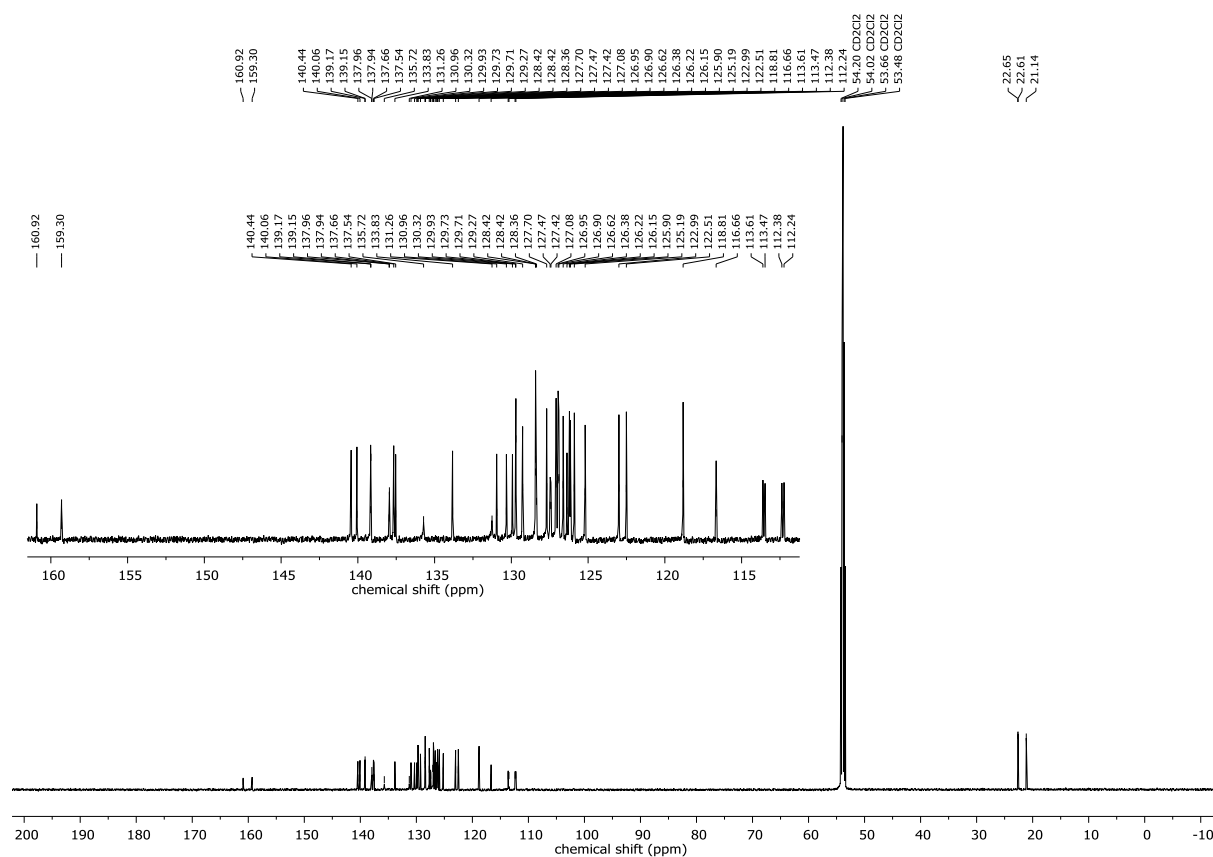

**<sup>11</sup>B NMR (161 MHz, CD<sub>2</sub>Cl<sub>2</sub>)**

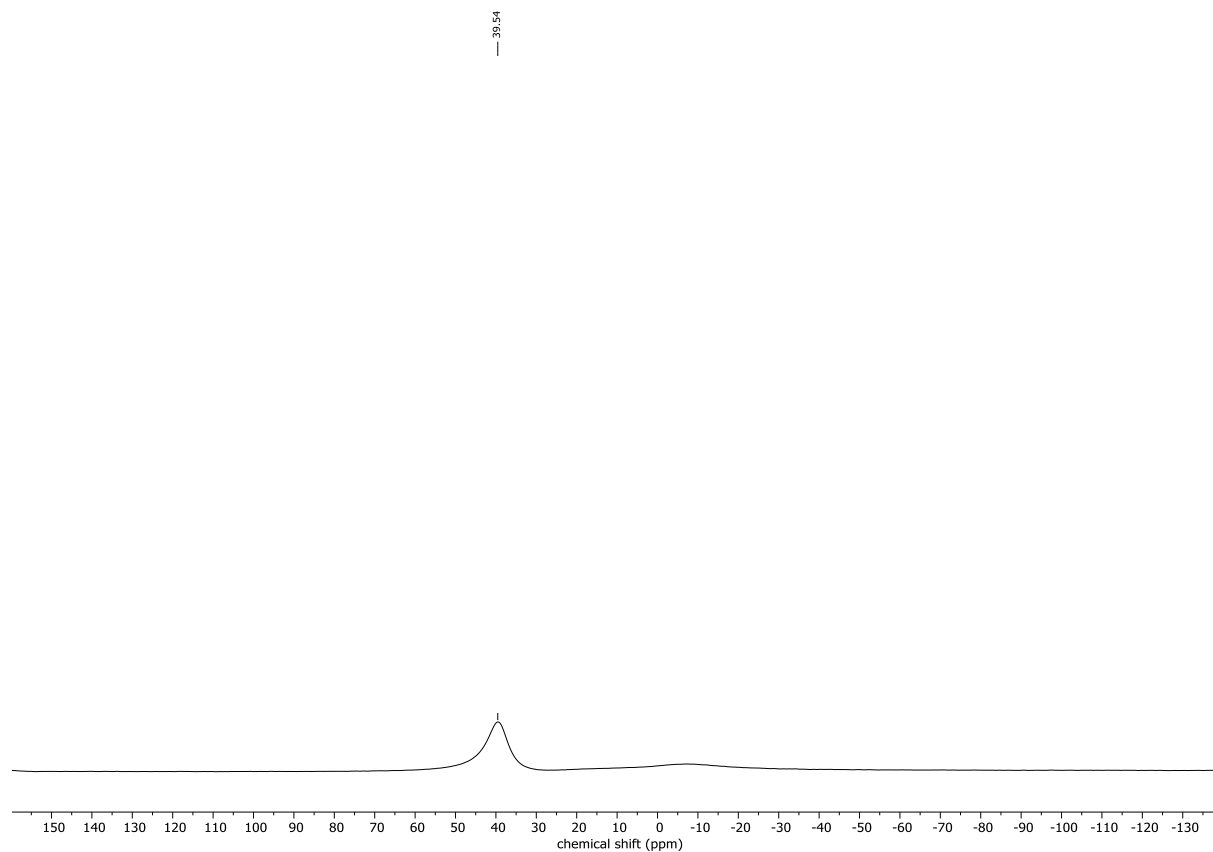

**$^{19}\text{F}$  NMR (282 MHz,  $\text{CD}_2\text{Cl}_2$ )**

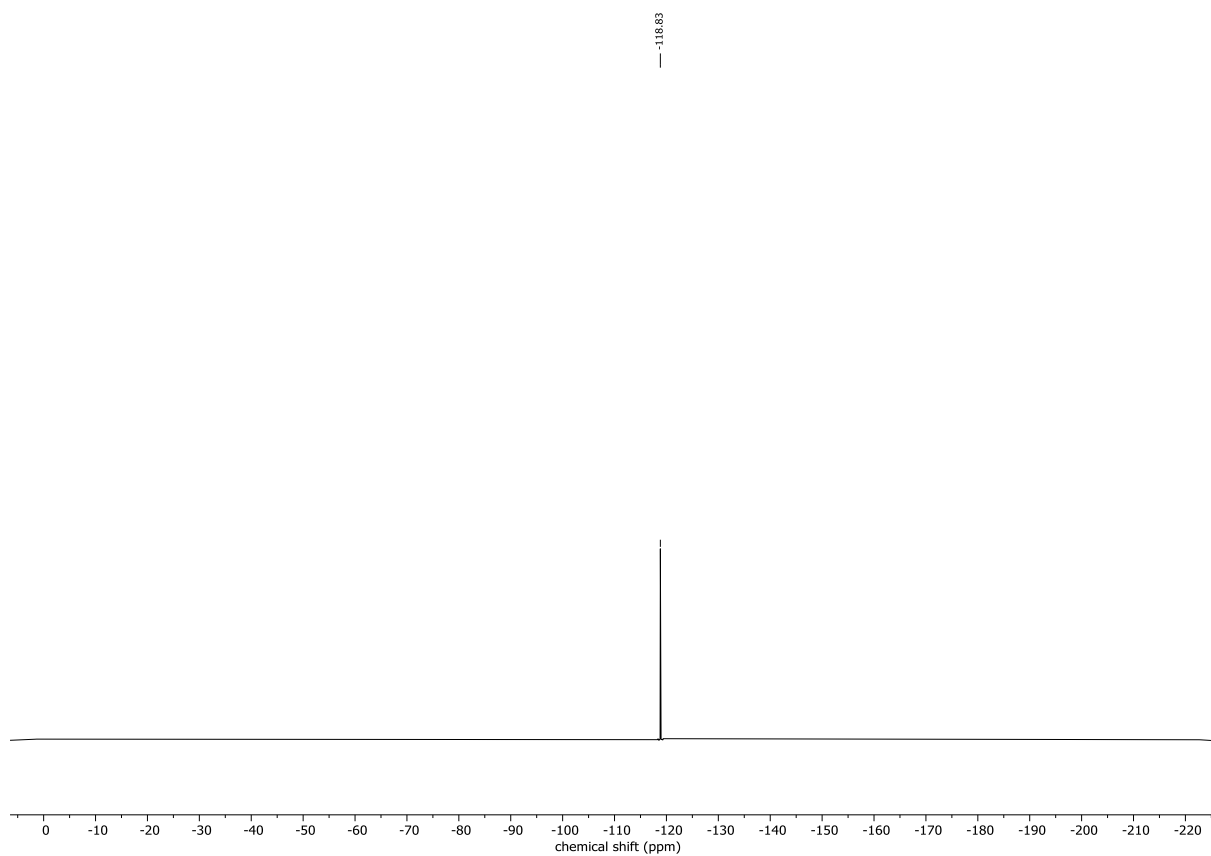



$^{13}\text{C}$  NMR (126 MHz,  $\text{CD}_2\text{Cl}_2$ ,  $-35^\circ\text{C}$ )

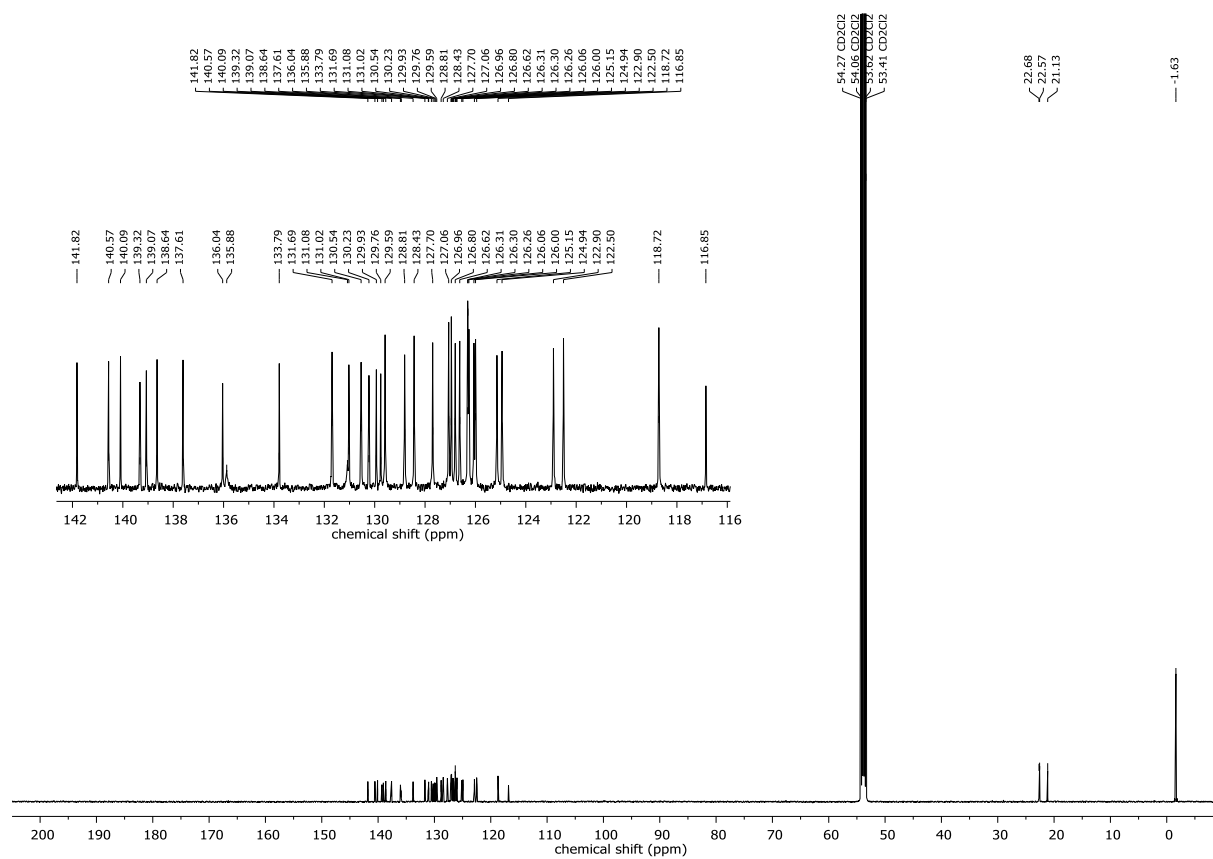

$^{11}\text{B}$  NMR (161 MHz,  $\text{CD}_2\text{Cl}_2$ )

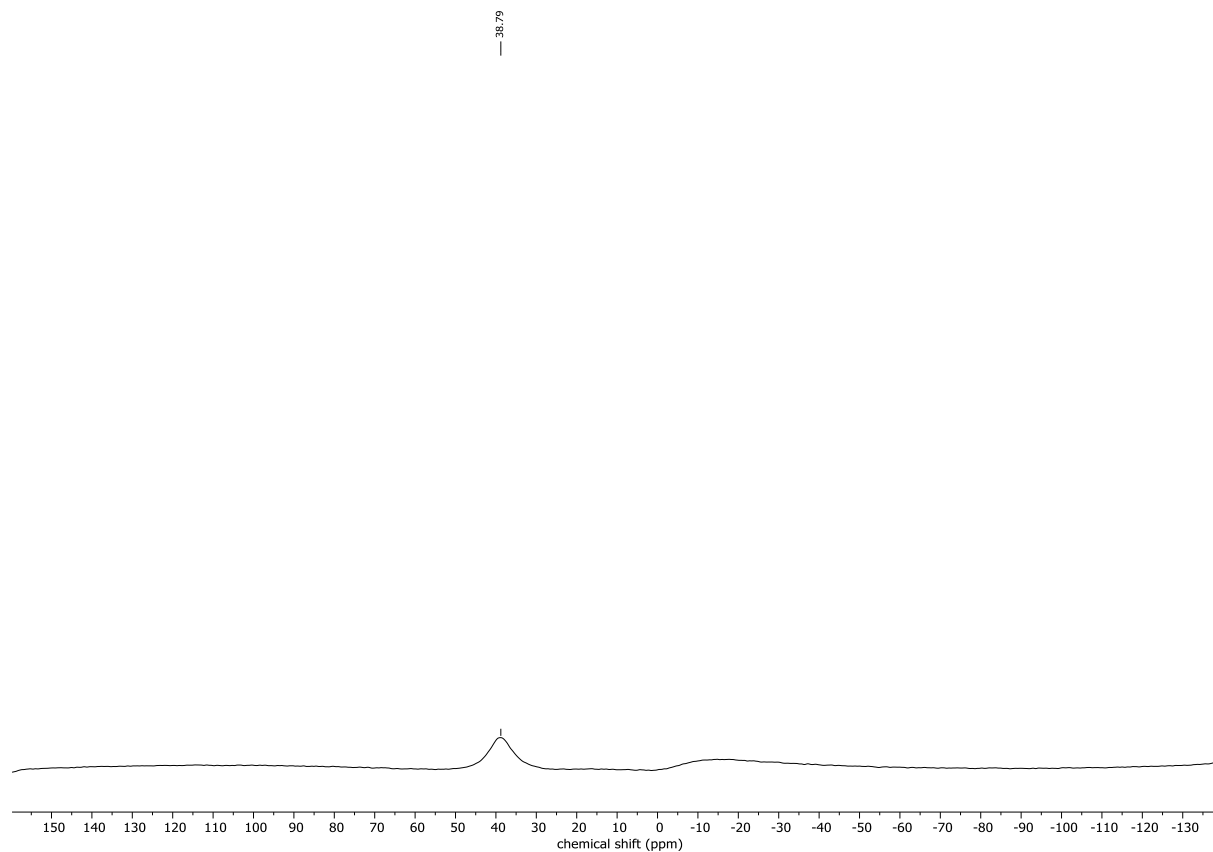

<sup>1</sup>H NMR (500 MHz, CD<sub>2</sub>Cl<sub>2</sub>, -35 °C) **1g**

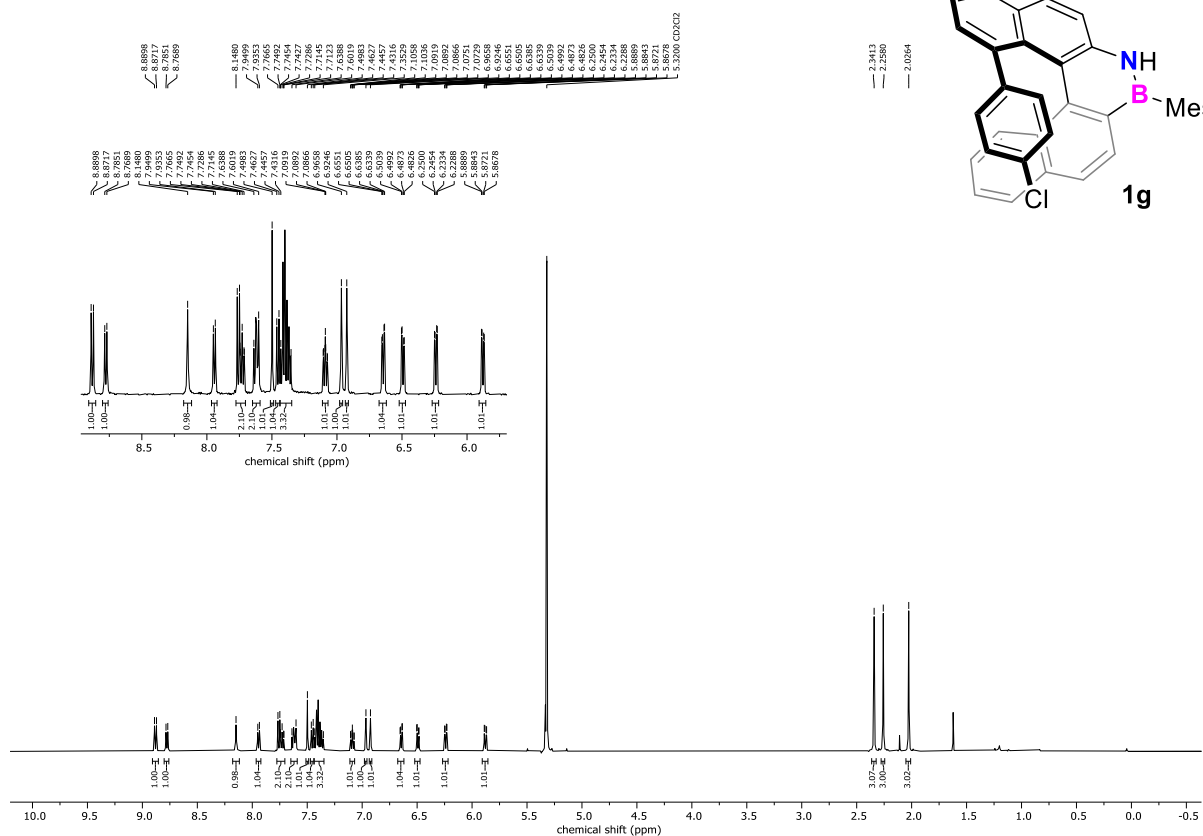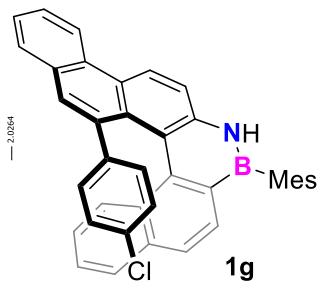

<sup>1</sup>H NMR (300 MHz, CD<sub>2</sub>Cl<sub>2</sub>; rt)

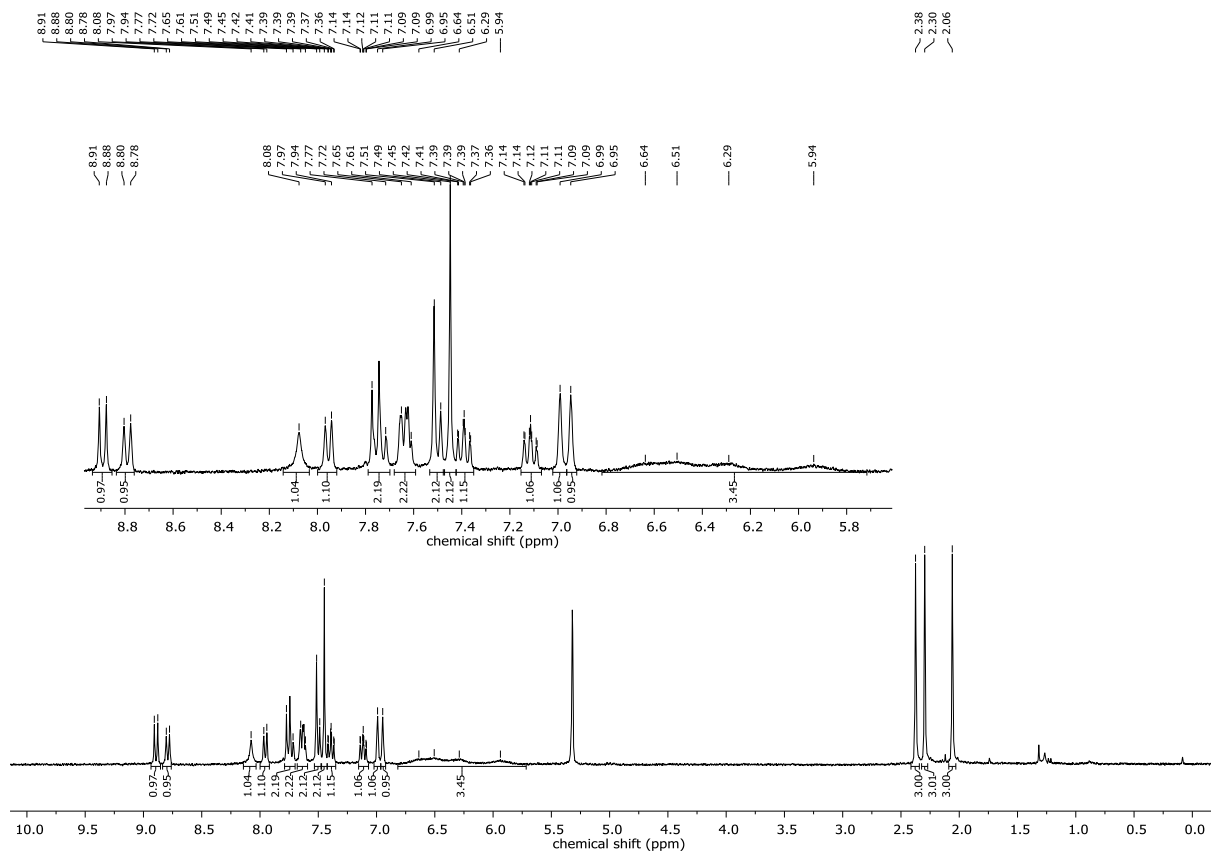

**$^{13}\text{C}$  NMR (126 MHz,  $\text{CD}_2\text{Cl}_2$ ,  $-35^\circ\text{C}$ )**

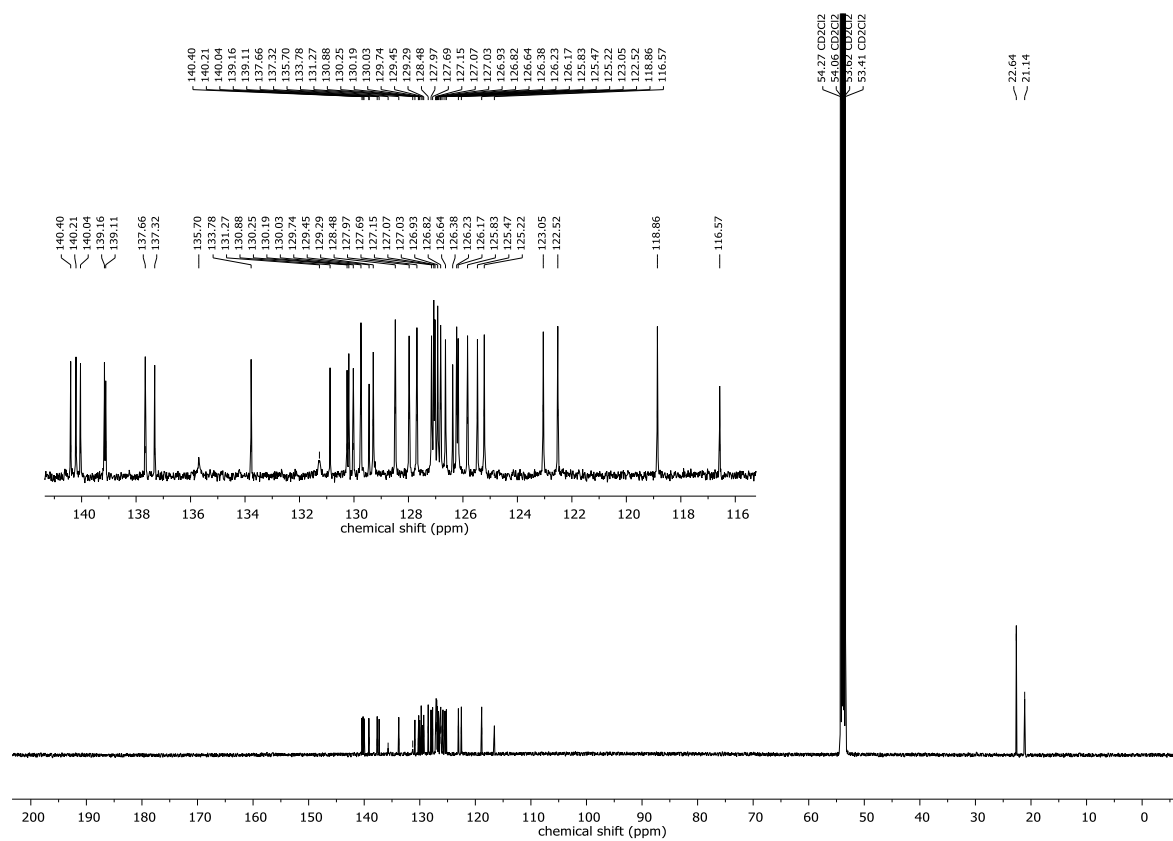

**$^{11}\text{B}$  NMR (161 MHz,  $\text{CD}_2\text{Cl}_2$ )**

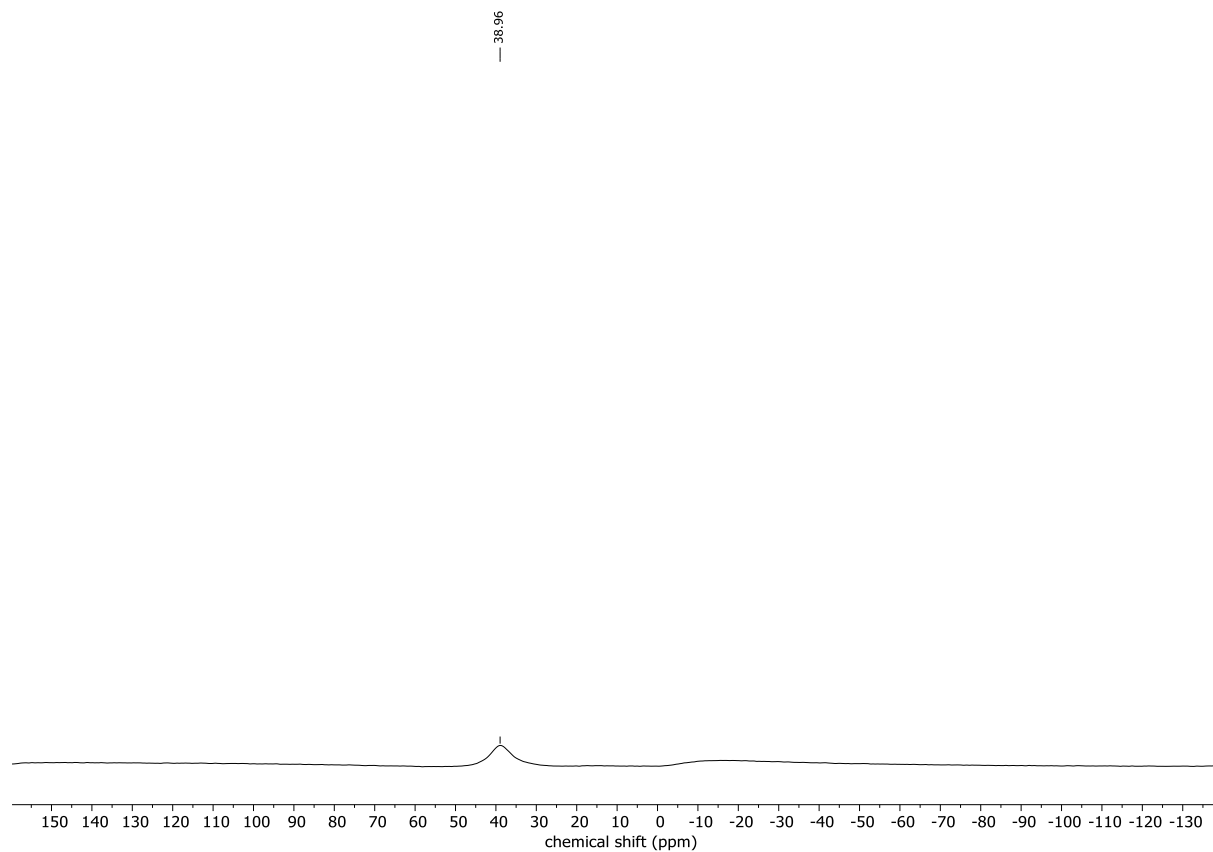



**<sup>13</sup>C NMR (126 MHz, CD<sub>2</sub>Cl<sub>2</sub>)**

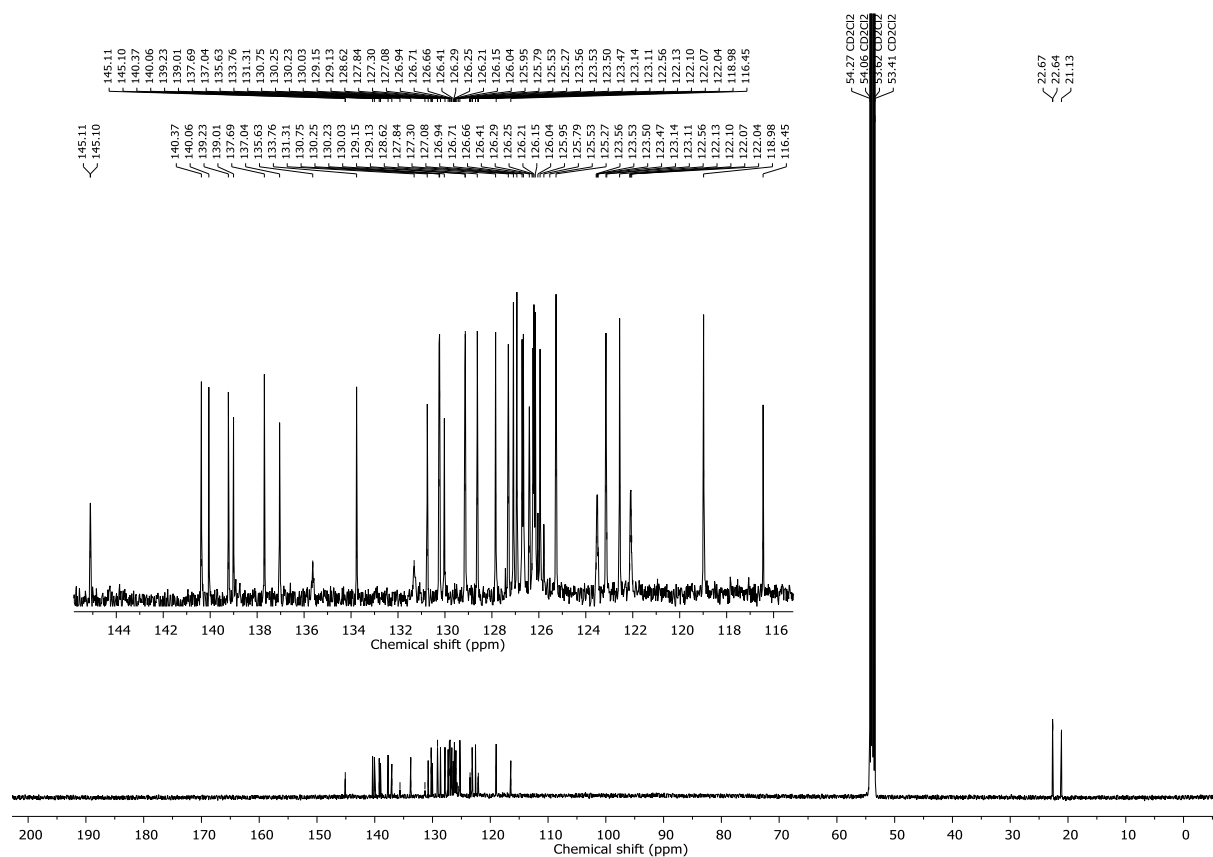

**<sup>11</sup>B NMR (161 MHz, CD<sub>2</sub>Cl<sub>2</sub>)**

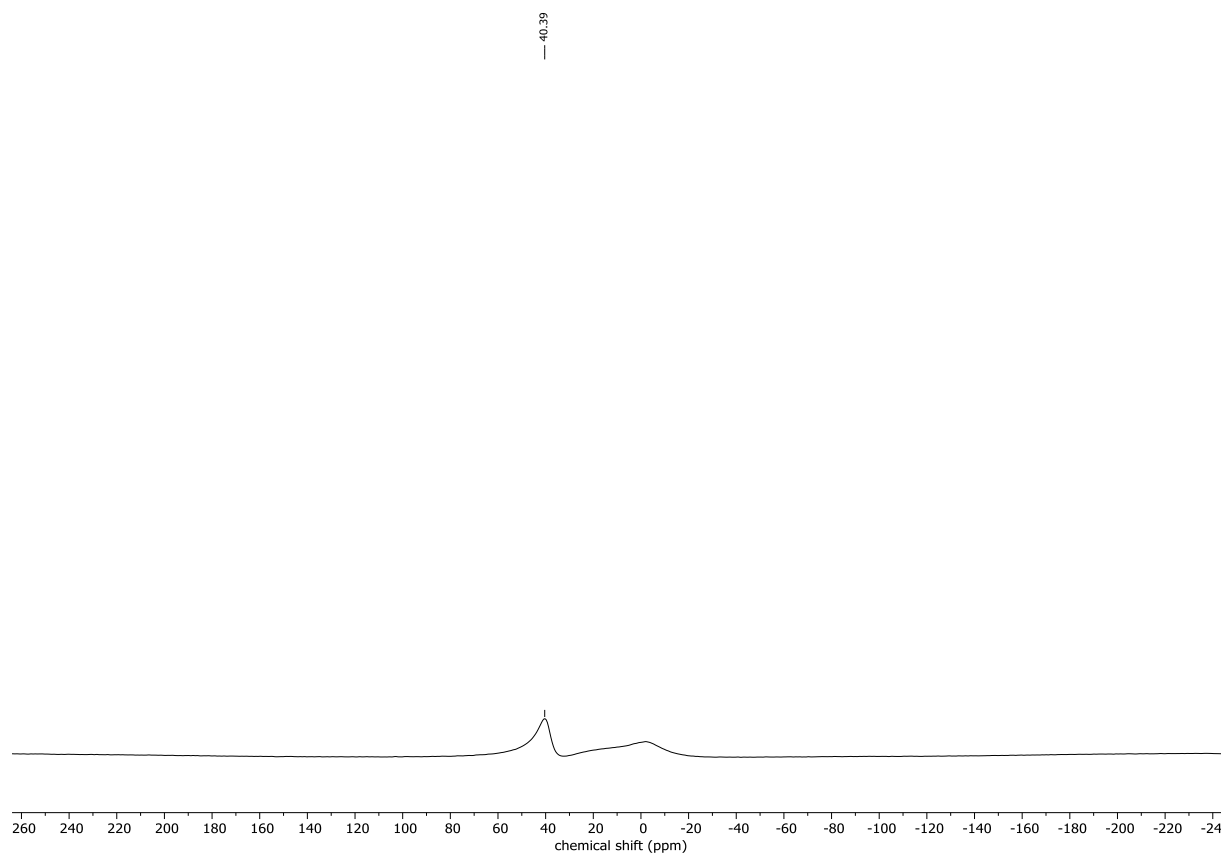

**$^{19}\text{F}$  NMR (377 MHz,  $\text{CDCl}_3$ )**

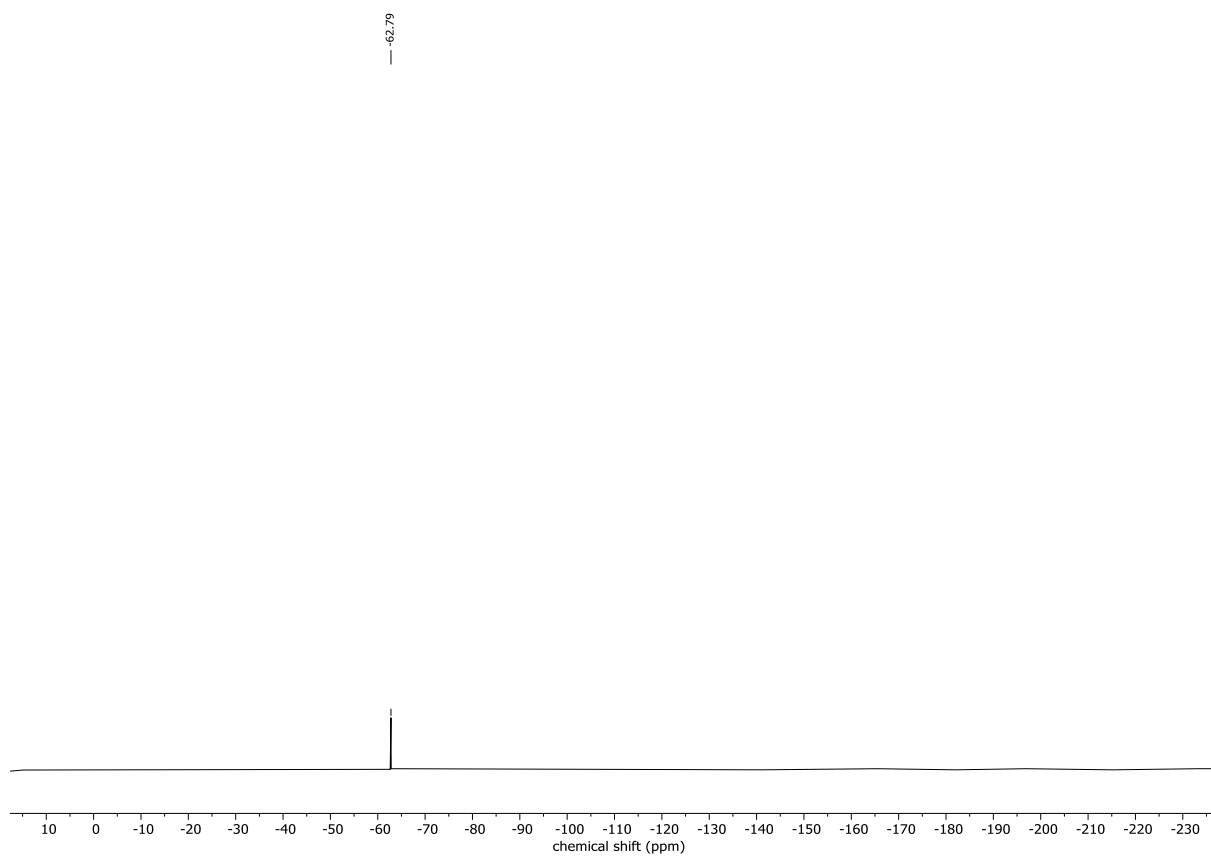



**$^{13}\text{C}$  NMR (101 MHz,  $\text{CDCl}_3$ , 25 °C)**

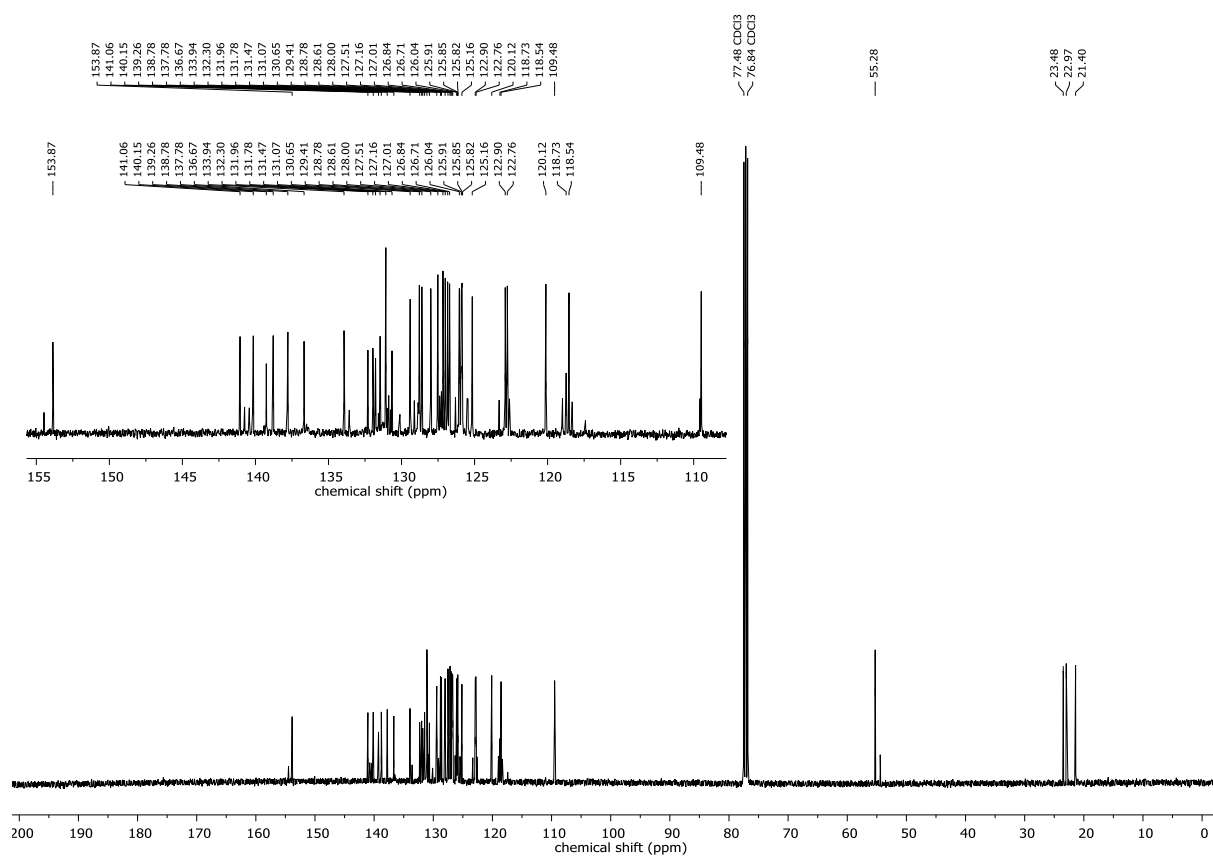

**$^{11}\text{B}$  NMR (128 MHz,  $\text{CDCl}_3$ , 25 °C)**

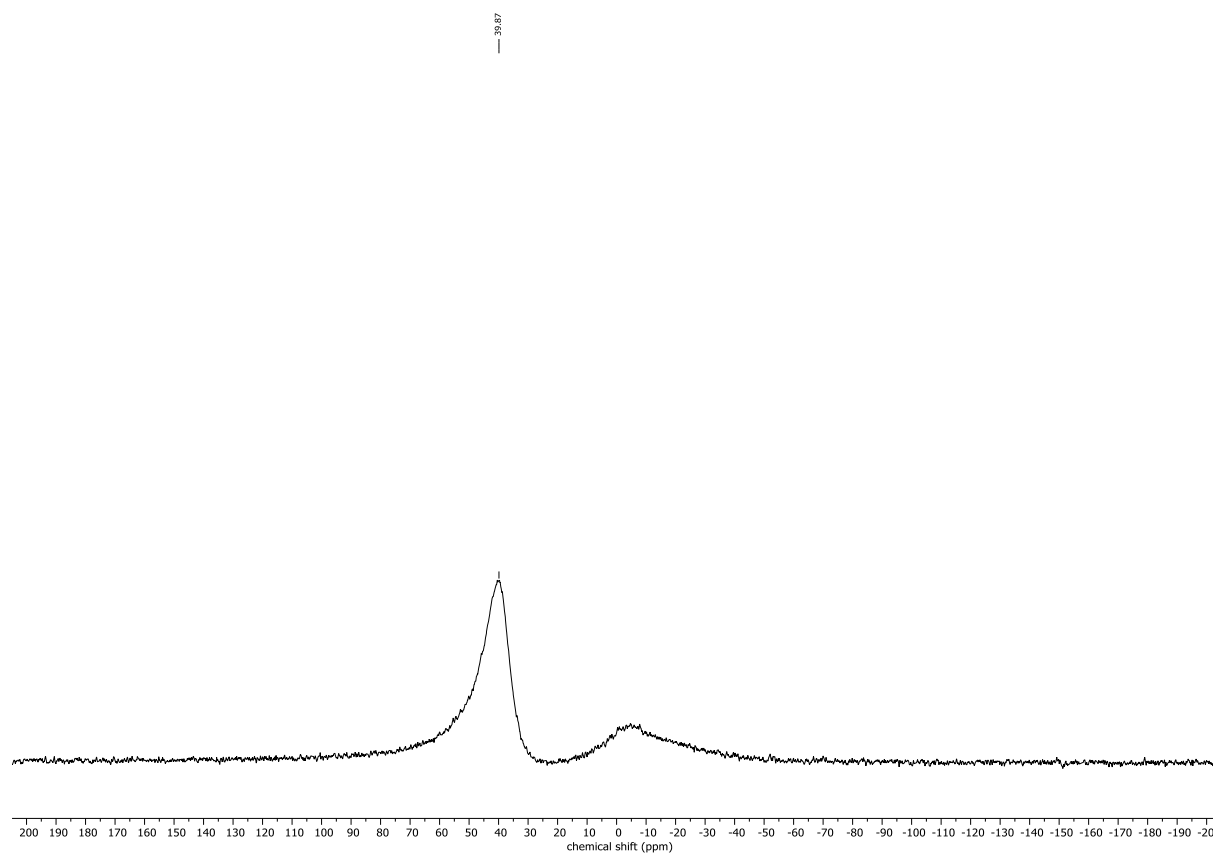



**$^{11}\text{B}$  NMR (161 MHz,  $\text{CD}_2\text{Cl}_2$ )**

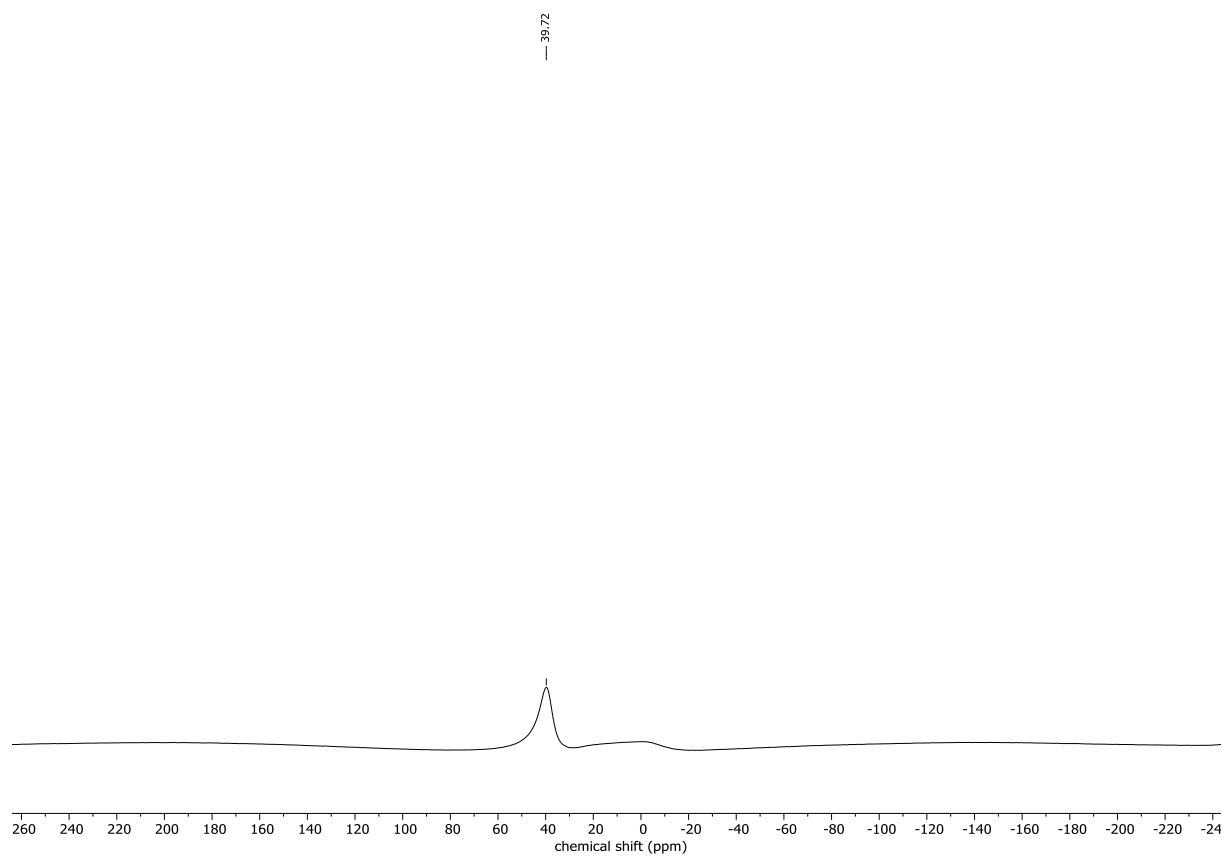

<sup>1</sup>H NMR (600 MHz, CD<sub>2</sub>Cl<sub>2</sub>, -50°C) **1b(BPh)**

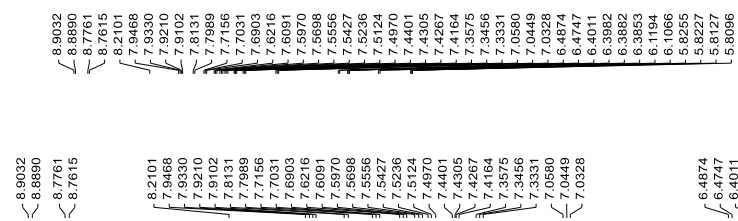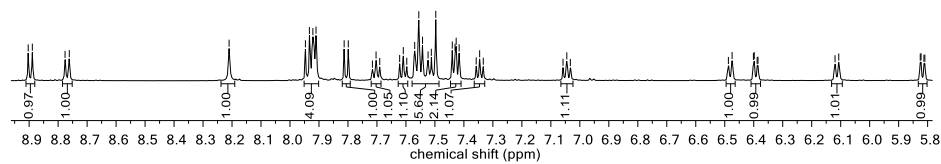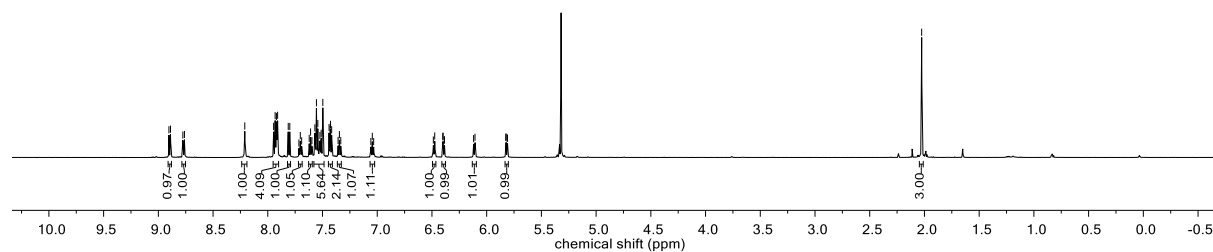

<sup>1</sup>H NMR (300 MHz, CD<sub>2</sub>Cl<sub>2</sub>; rt)

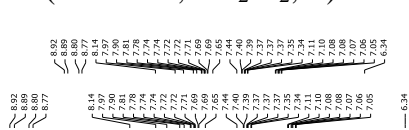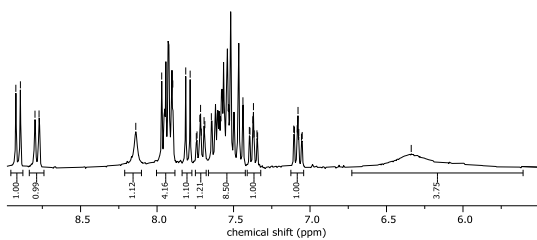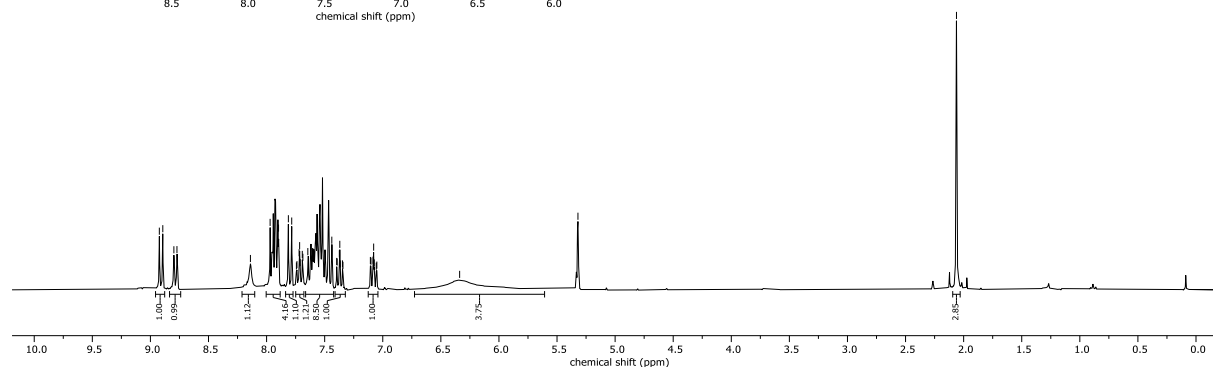

**$^{13}\text{C}$  NMR (126 MHz,  $\text{CD}_2\text{Cl}_2$ ,  $-35^\circ\text{C}$ )**

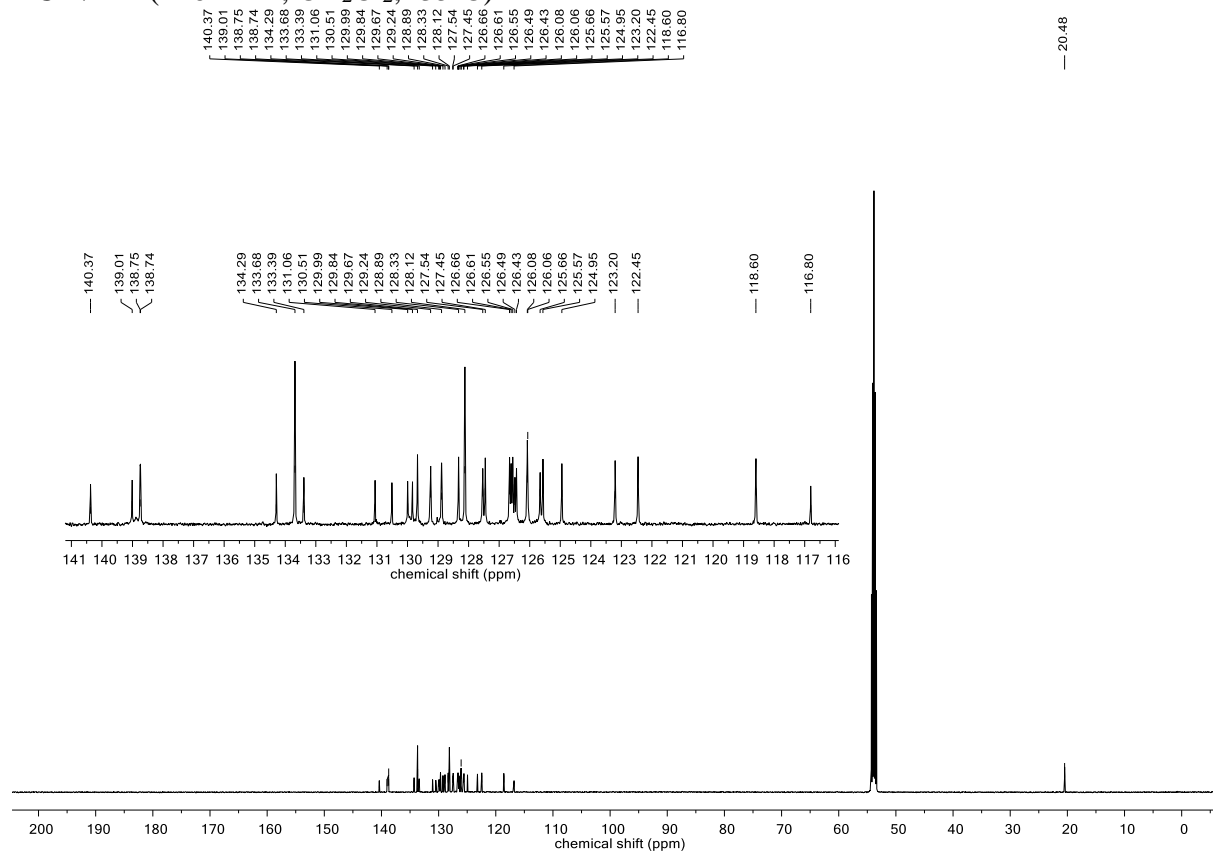

**$^{11}\text{B}$  NMR (161 MHz,  $\text{CD}_2\text{Cl}_2$ )**

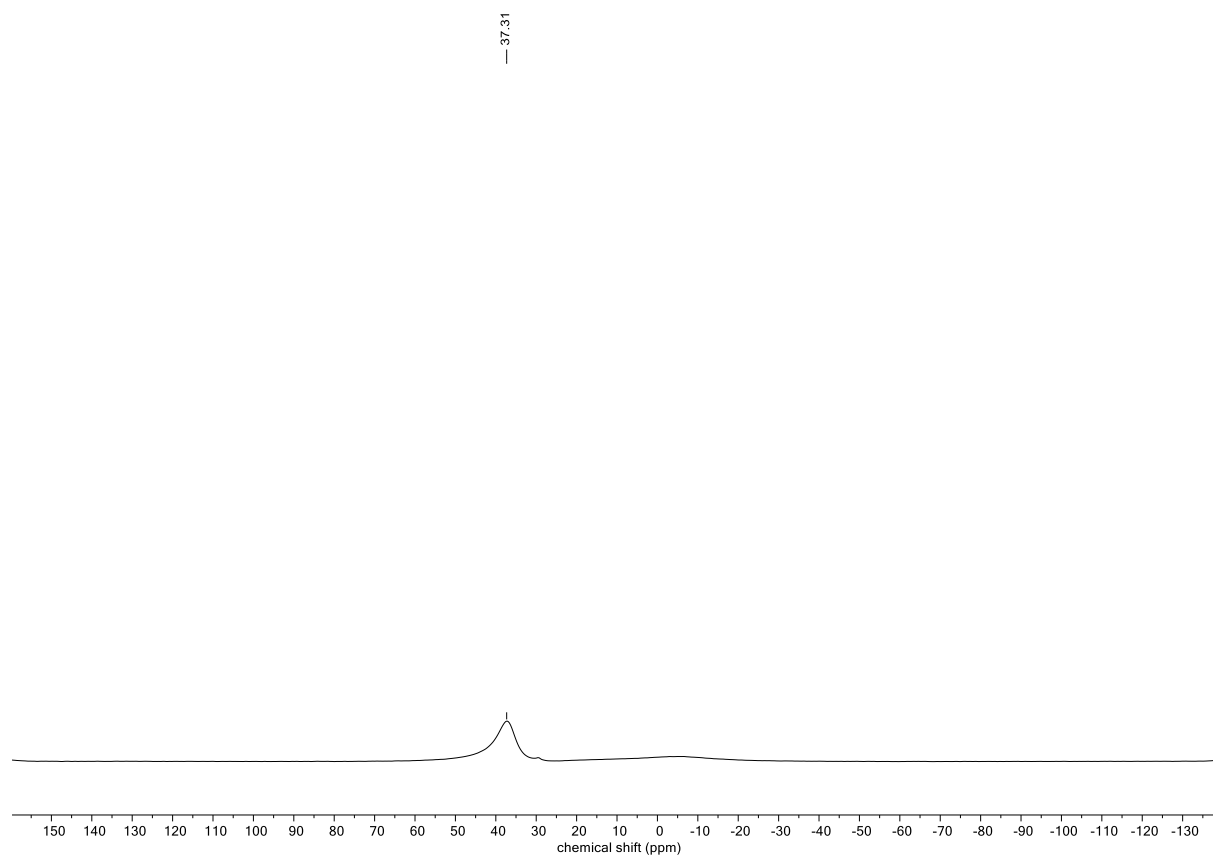



**$^{11}\text{B}$  NMR** (161 MHz,  $\text{CD}_2\text{Cl}_2$ )

—40.39

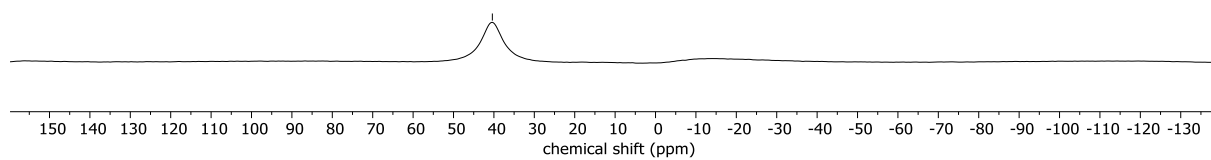

**<sup>1</sup>H NMR (500 MHz, CD<sub>2</sub>Cl<sub>2</sub>, -35 °C) 2b**

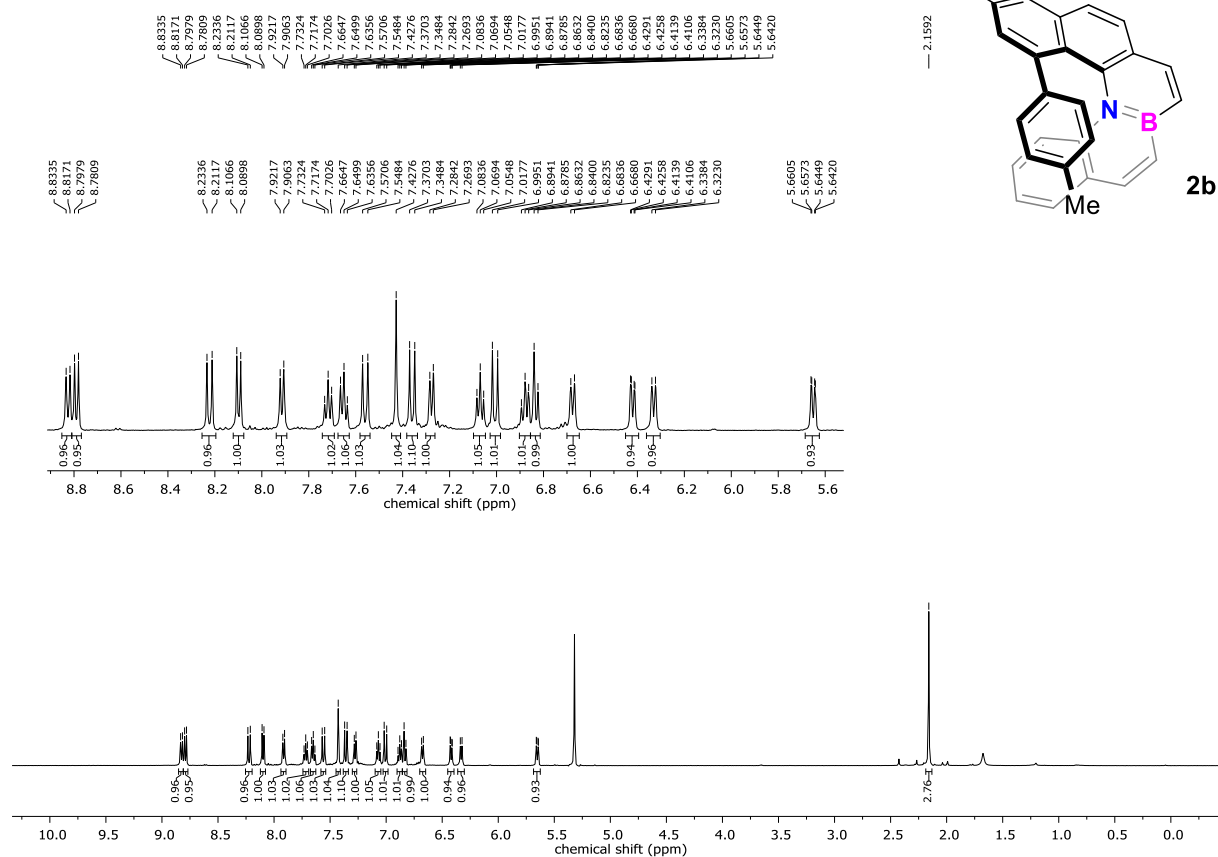

**<sup>1</sup>H NMR (300 MHz, CD<sub>2</sub>Cl<sub>2</sub>; rt)**

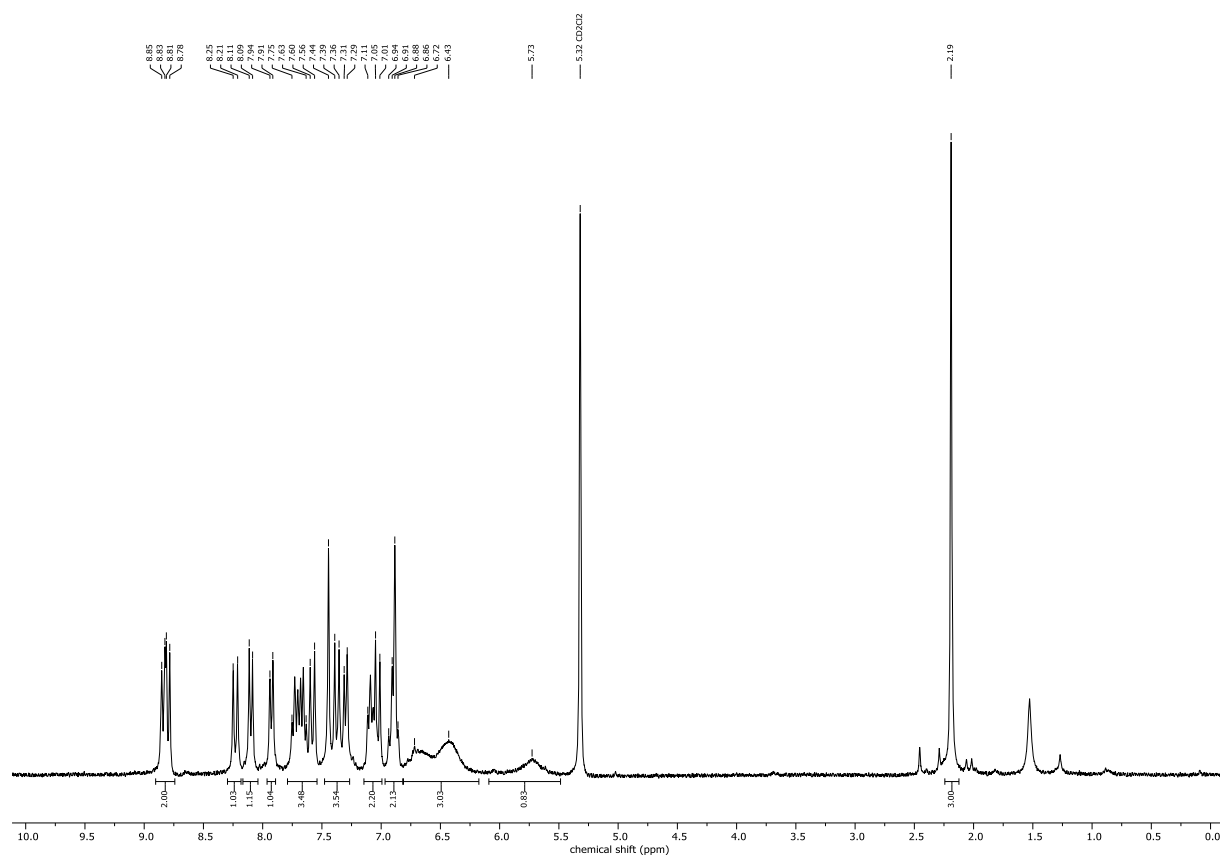

**$^{13}\text{C}$  NMR (126 MHz,  $\text{CD}_2\text{Cl}_2$ ,  $-35^\circ\text{C}$ )**

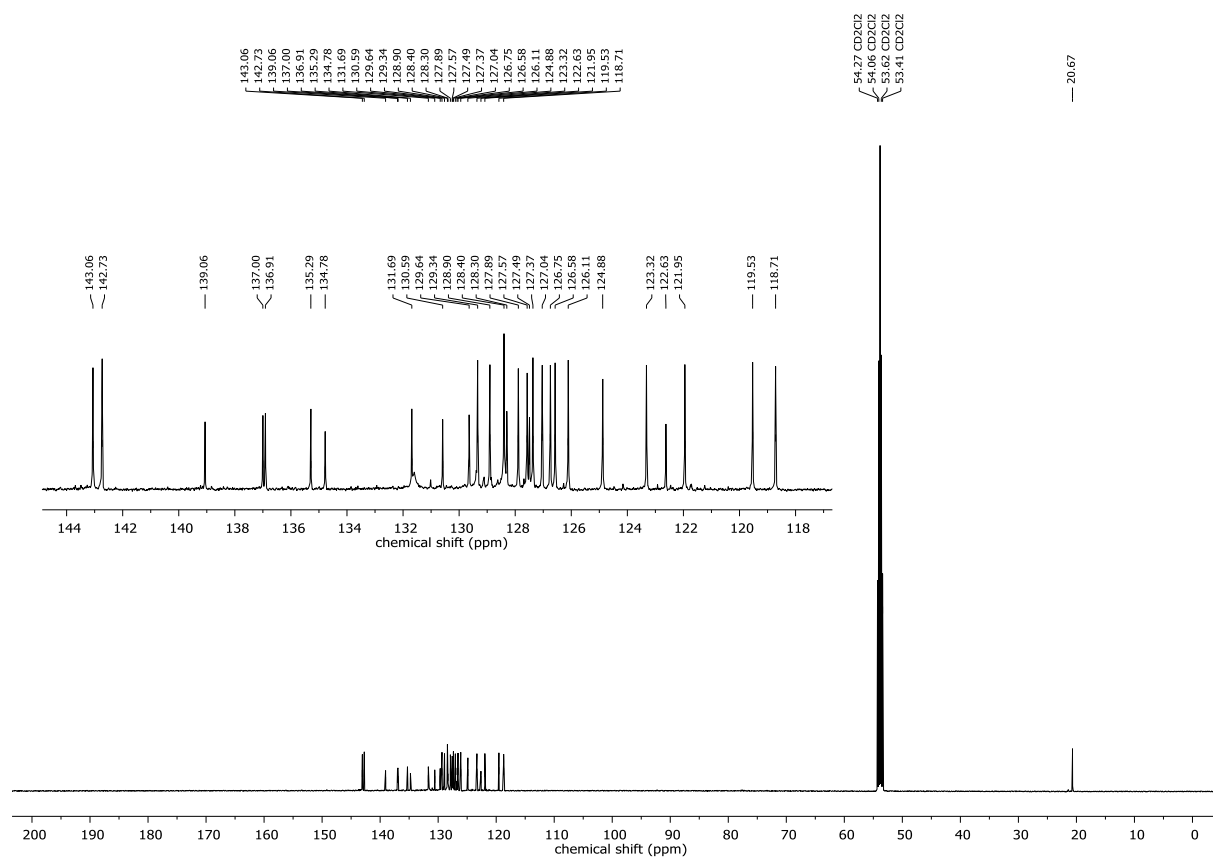

**$^{11}\text{B}$  NMR (161 MHz,  $\text{CDCl}_3$ )**

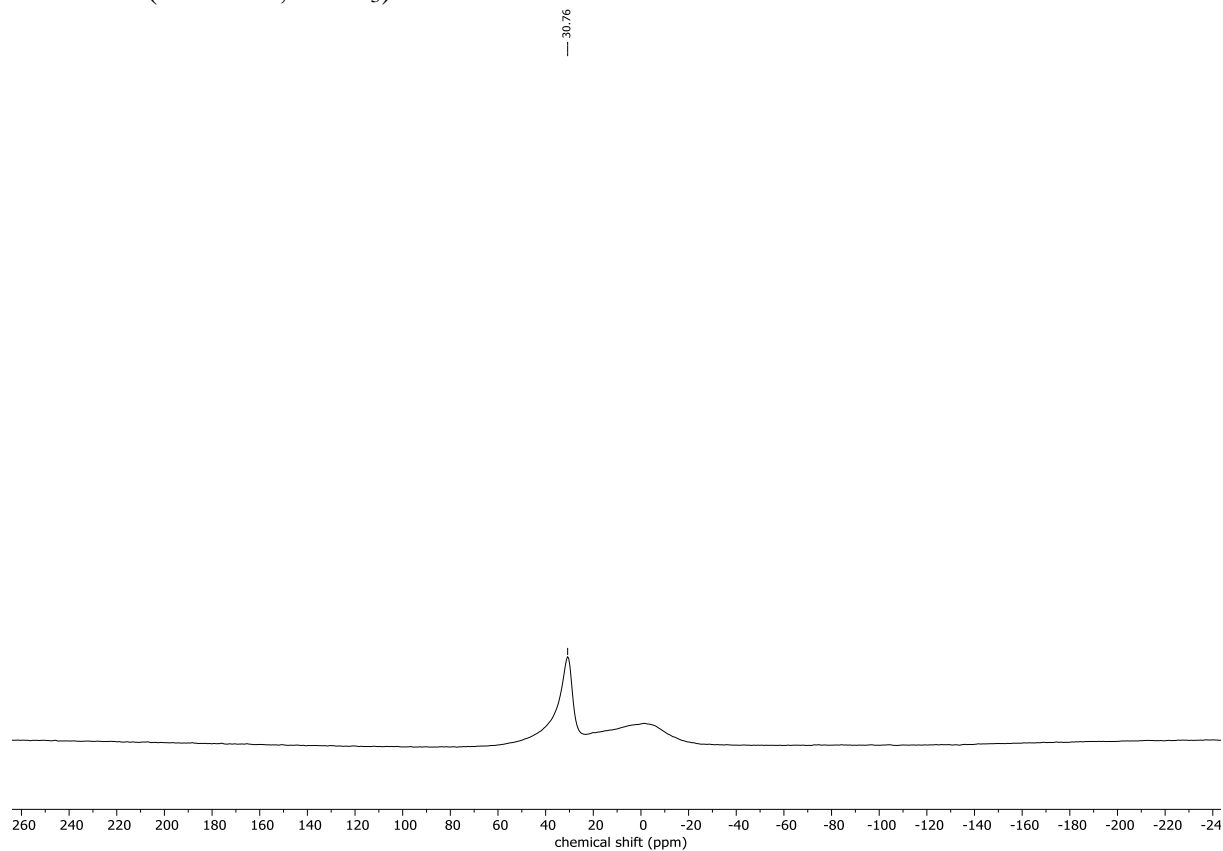

<sup>1</sup>H NMR (600 MHz, CDCl<sub>3</sub>, -35 °C) 2c

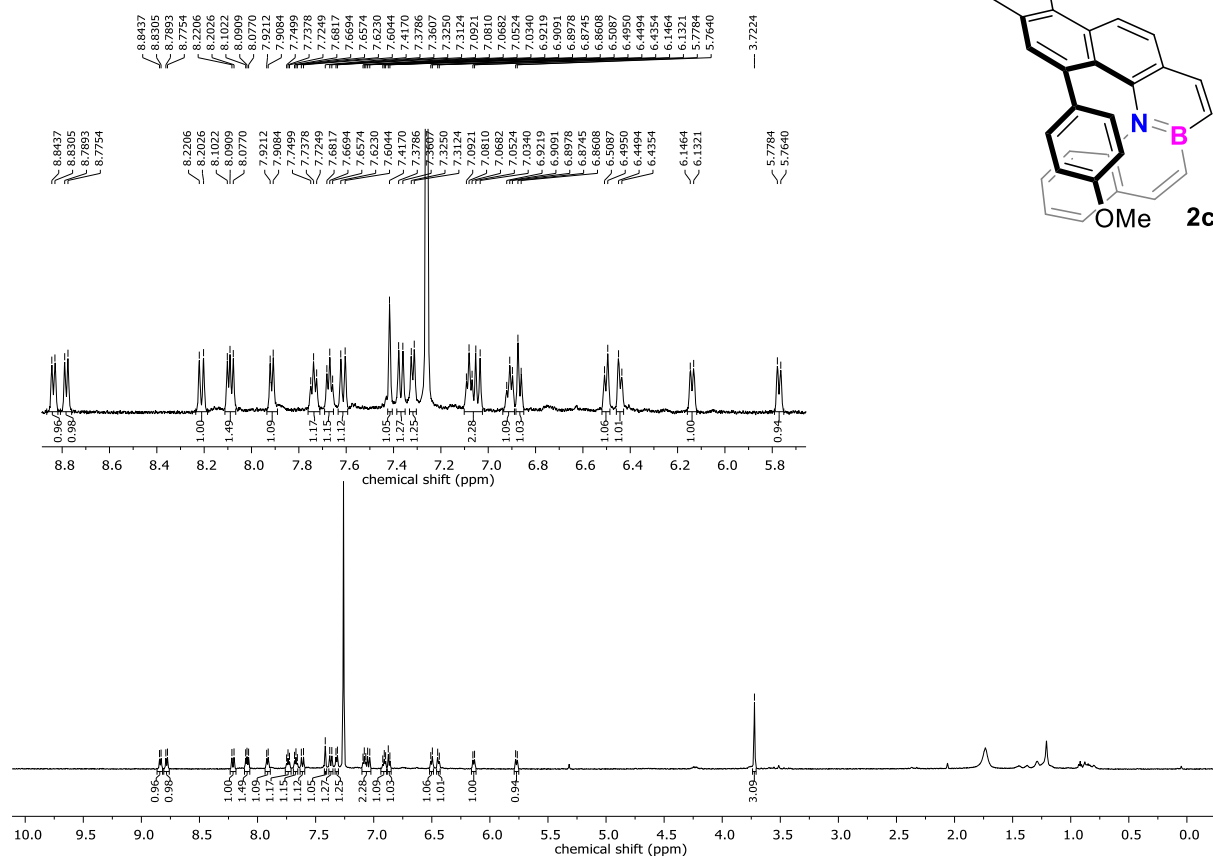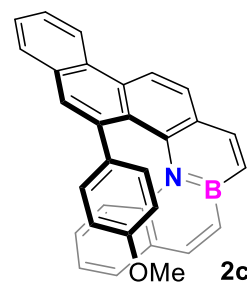

<sup>13</sup>C NMR (151 MHz, CDCl<sub>3</sub>, -35 °C)

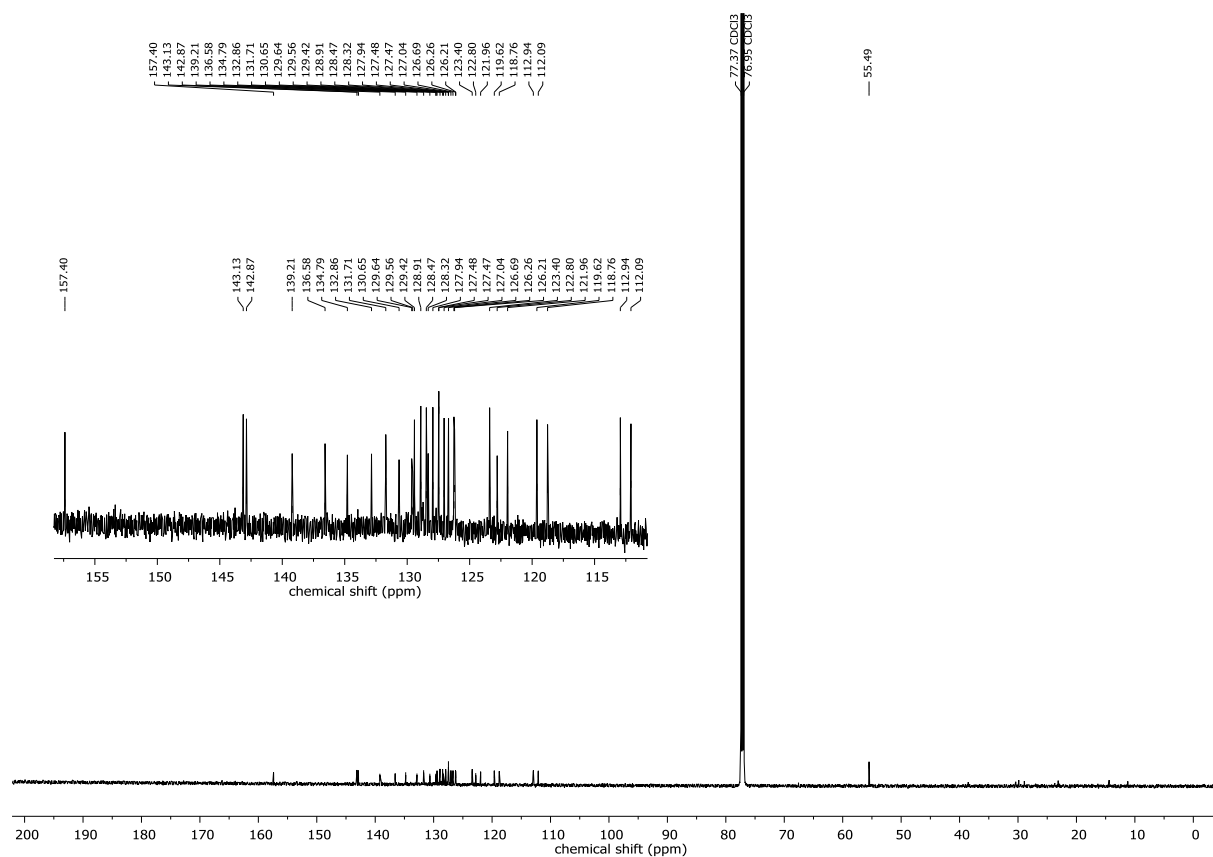

**$^{11}\text{B}$  NMR (128 MHz,  $\text{CDCl}_3$ )**

— 31.17

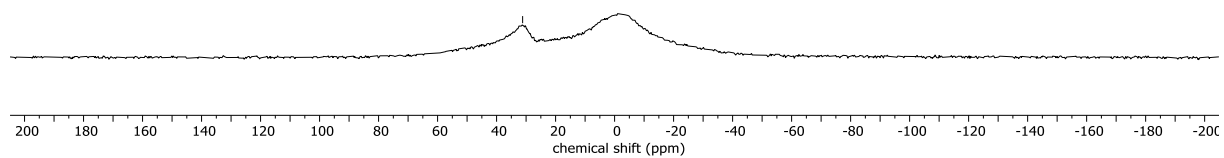



**<sup>13</sup>C NMR (126 MHz, CDCl<sub>3</sub>, -35 °C)**

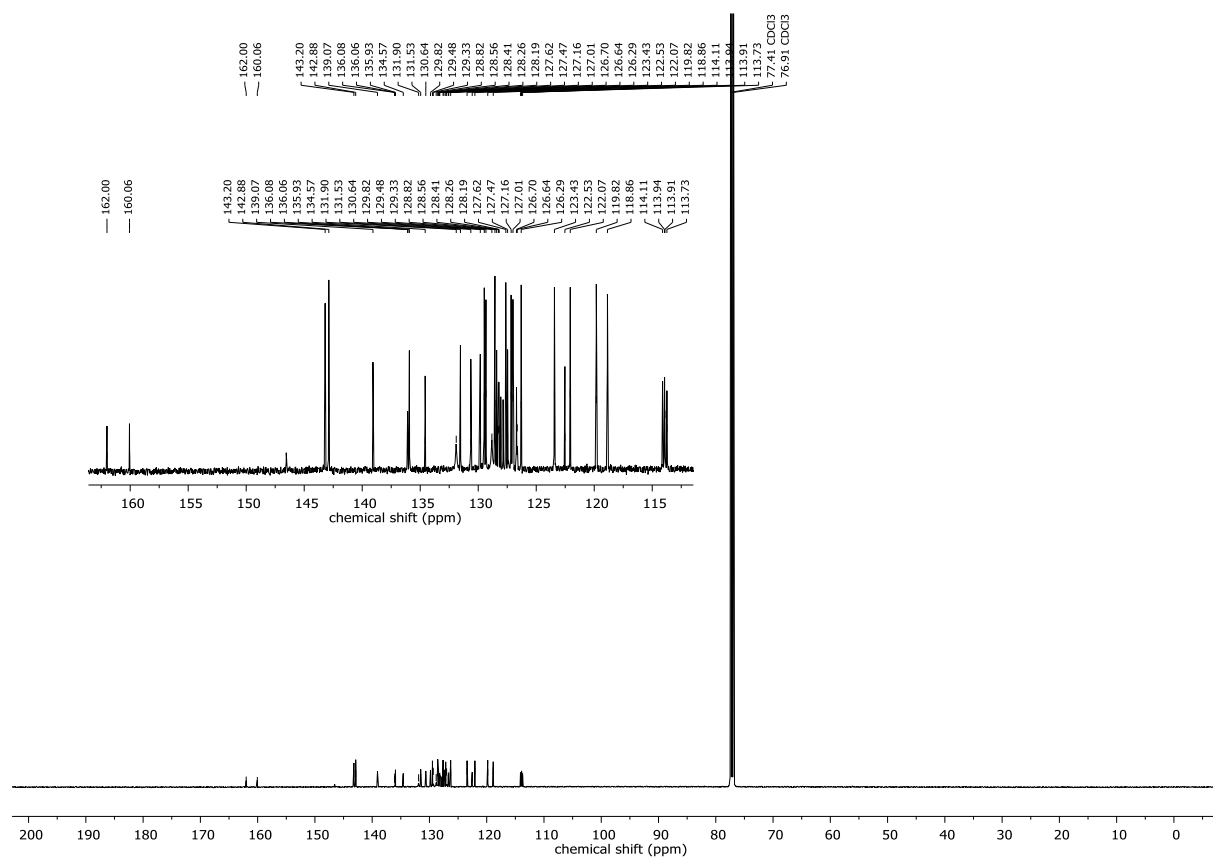

**<sup>11</sup>B NMR (161 MHz, CDCl<sub>3</sub>)**

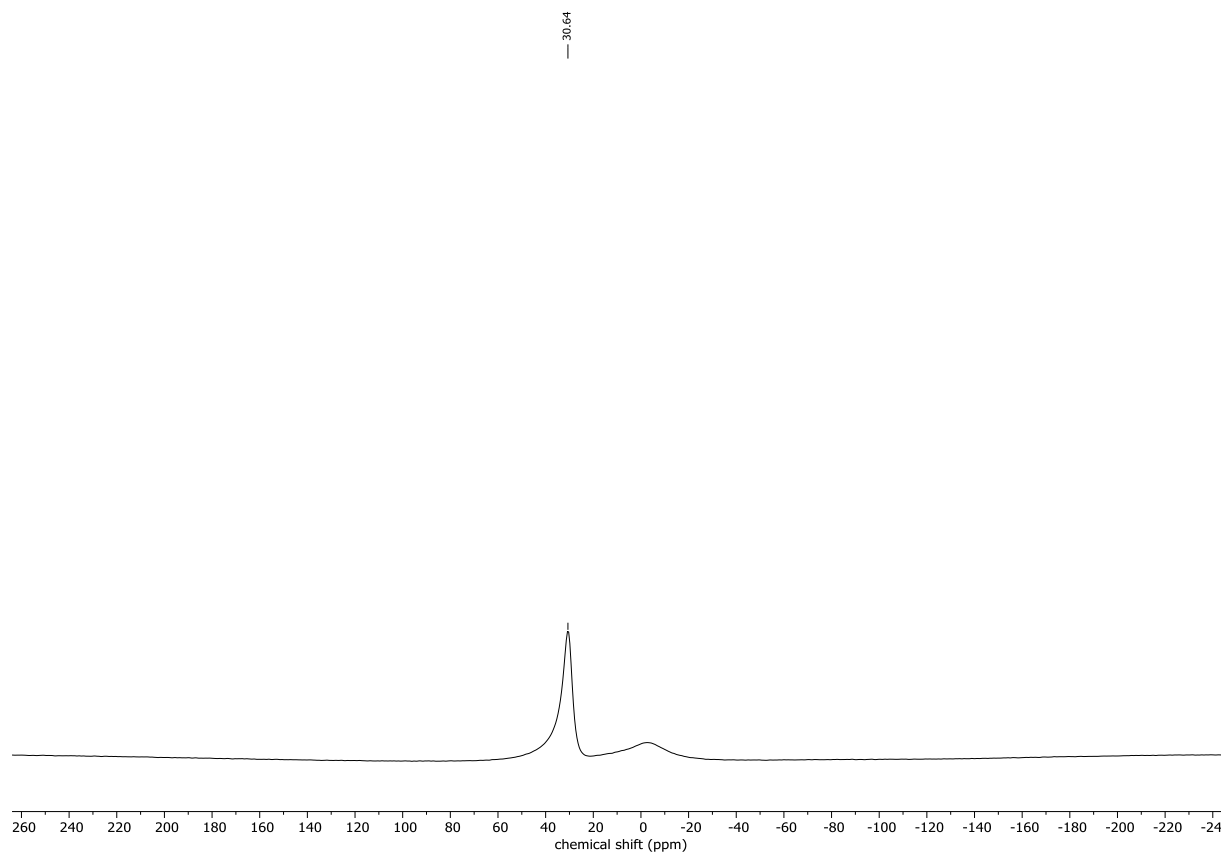

**$^{19}\text{F}$  NMR (282 MHz,  $\text{CDCl}_3$ )**

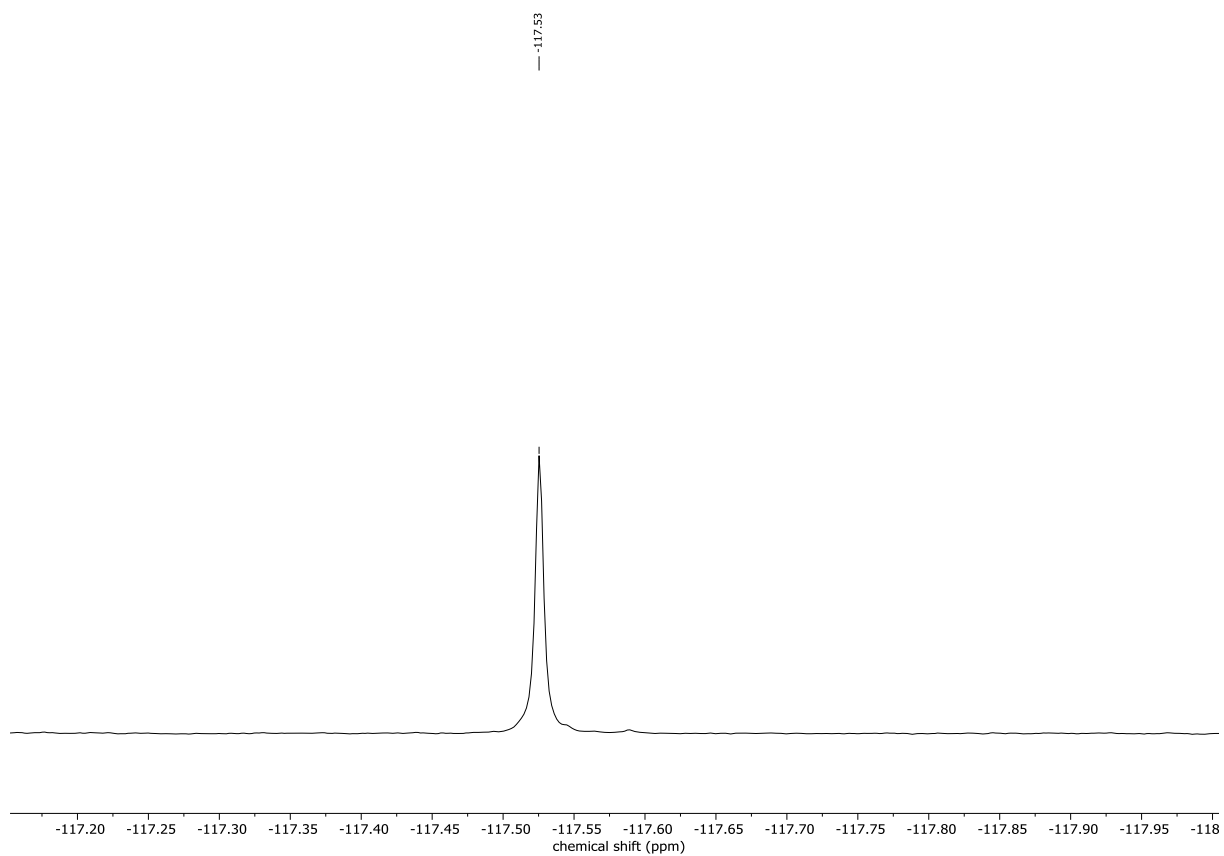

<sup>1</sup>H NMR (500 MHz, CDCl<sub>3</sub>, -35 °C) 2h

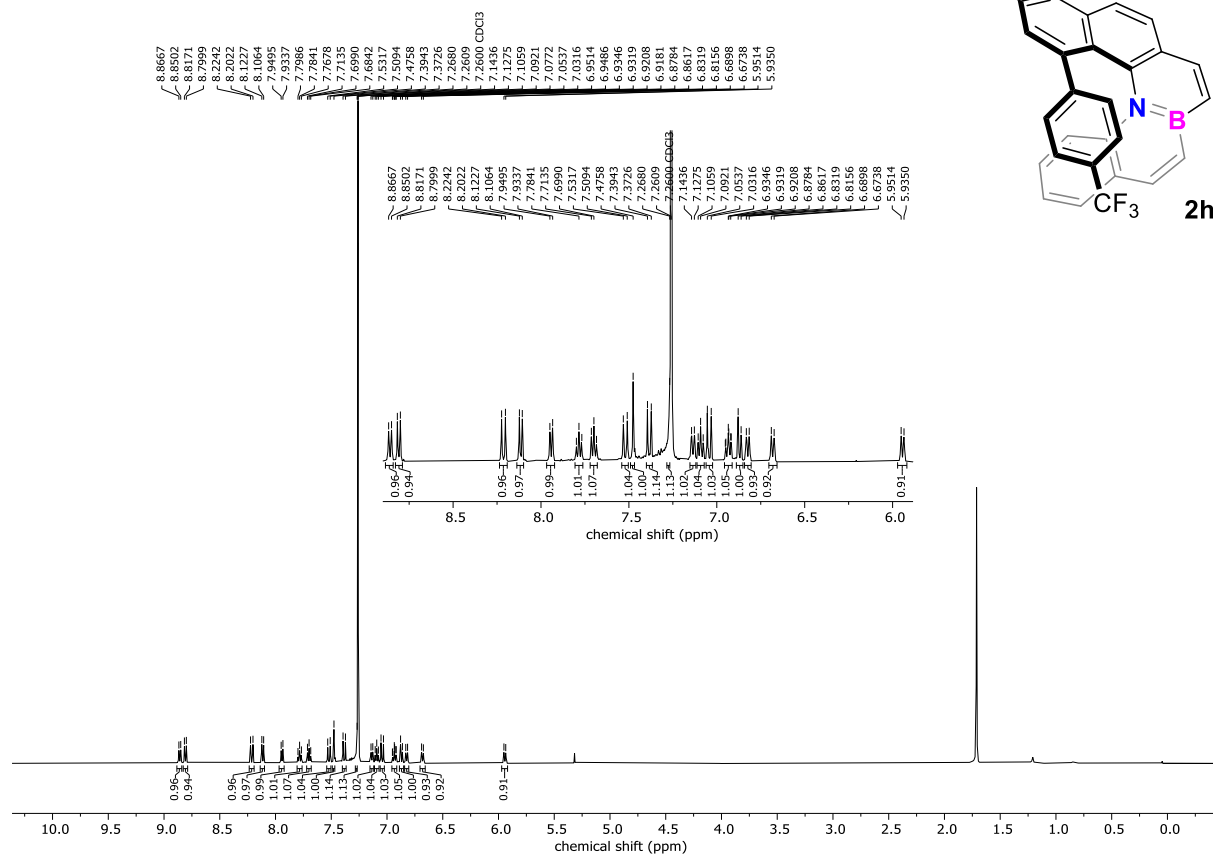

<sup>1</sup>H NMR (300 MHz, CDCl<sub>3</sub>; rt)

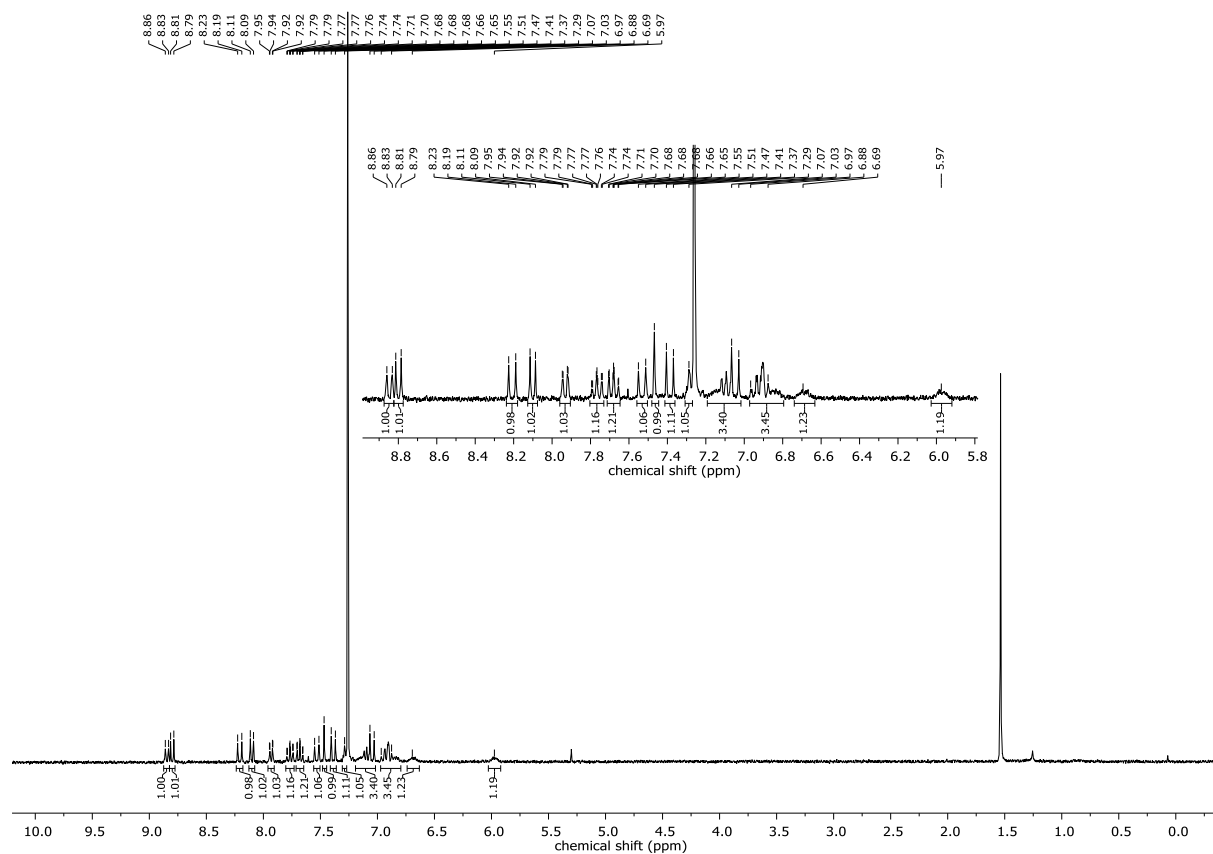

**<sup>13</sup>C NMR (126 MHz, CDCl<sub>3</sub>, -35 °C)**

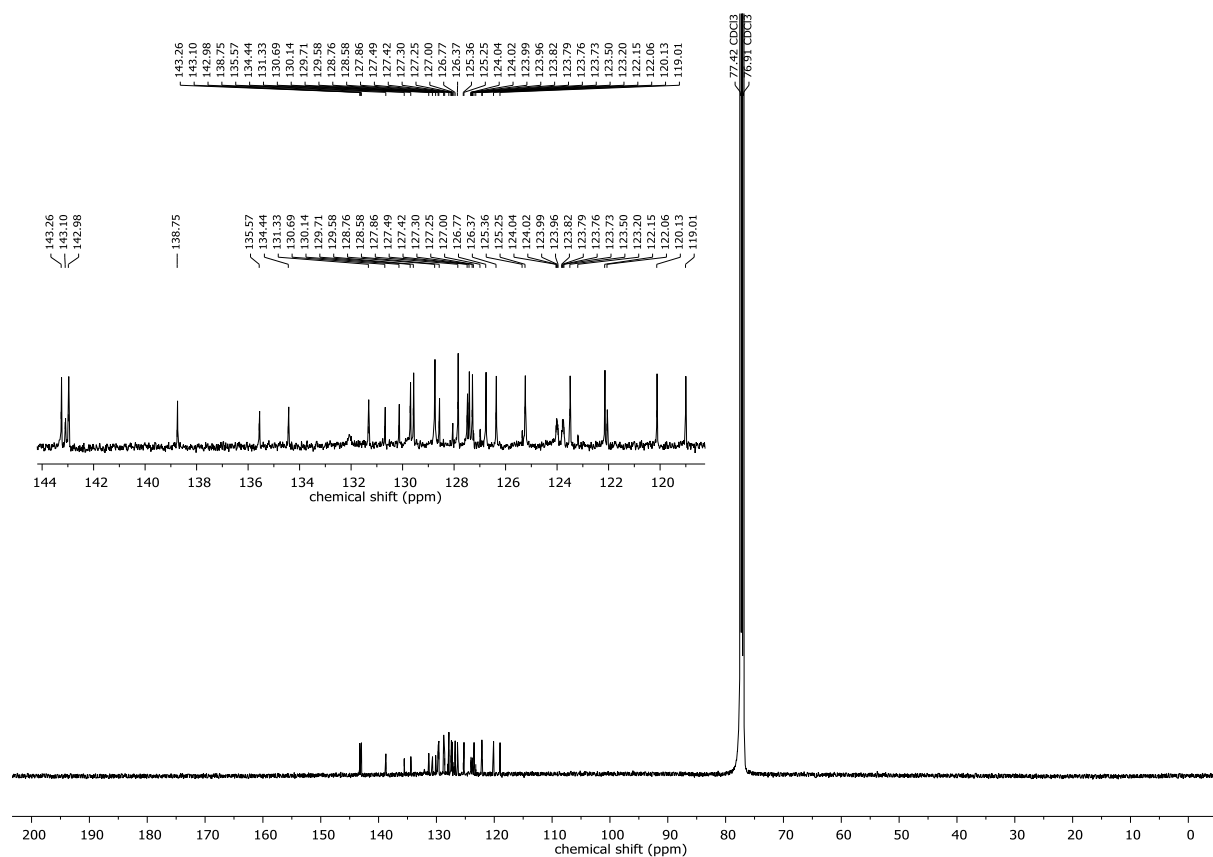

**<sup>11</sup>B NMR (161 MHz, CDCl<sub>3</sub>)**

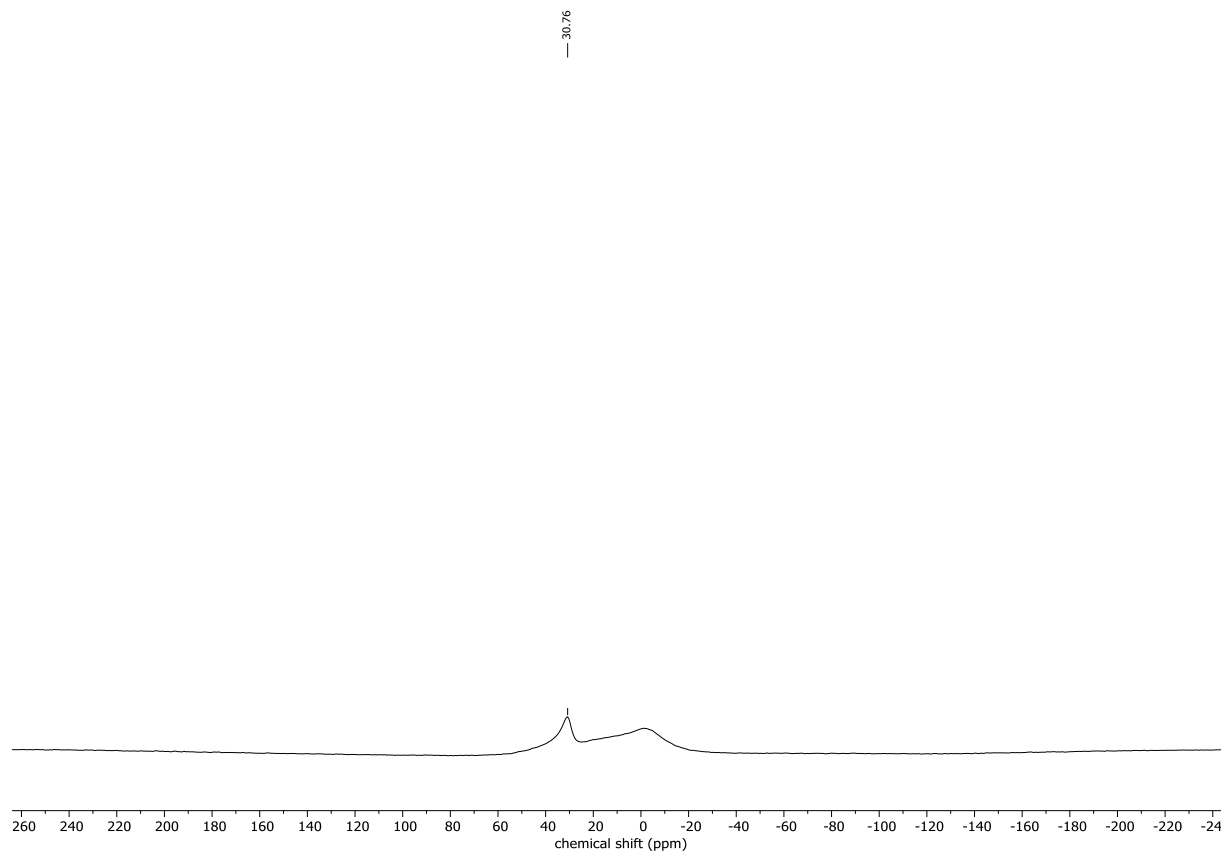

**$^{19}\text{F}$  NMR (282 MHz,  $\text{CDCl}_3$ )**

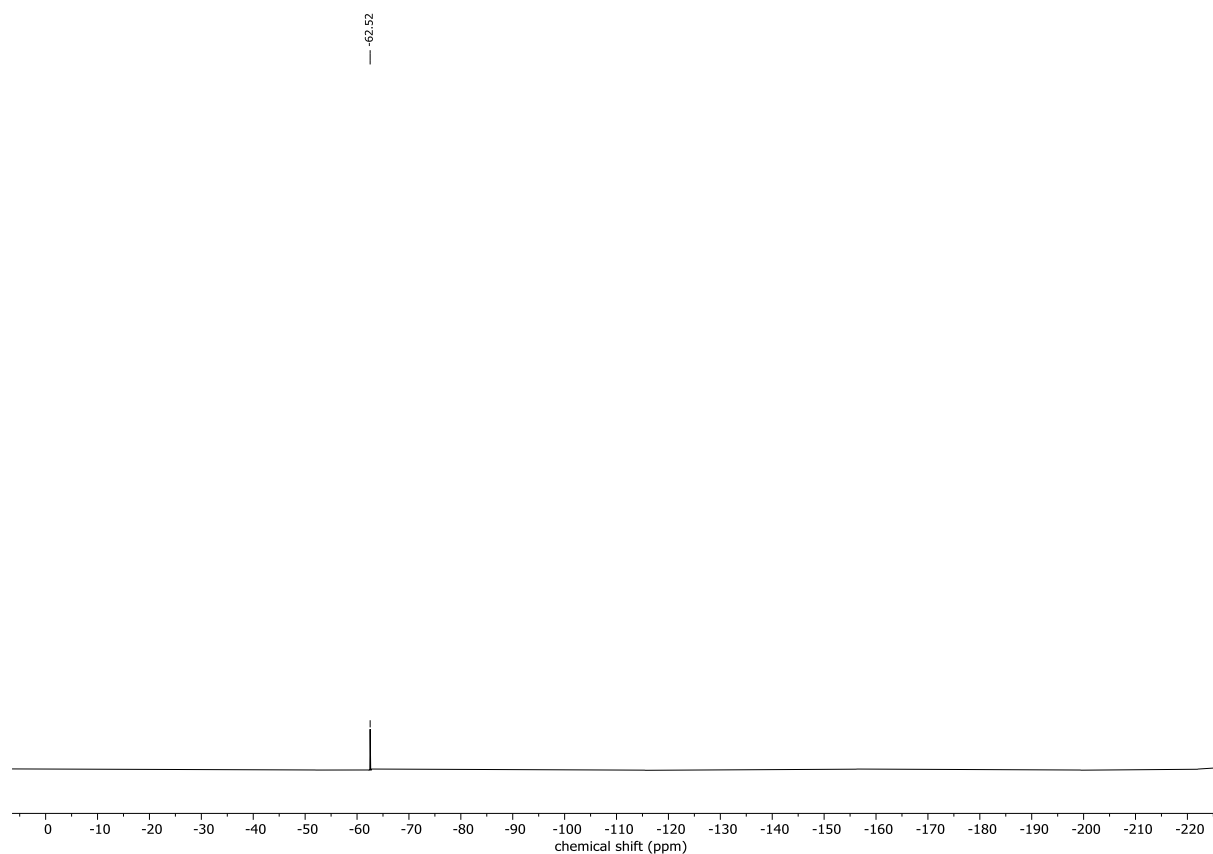

**$^1\text{H}$  NMR (300 MHz,  $\text{CDCl}_3$ ) S10a**

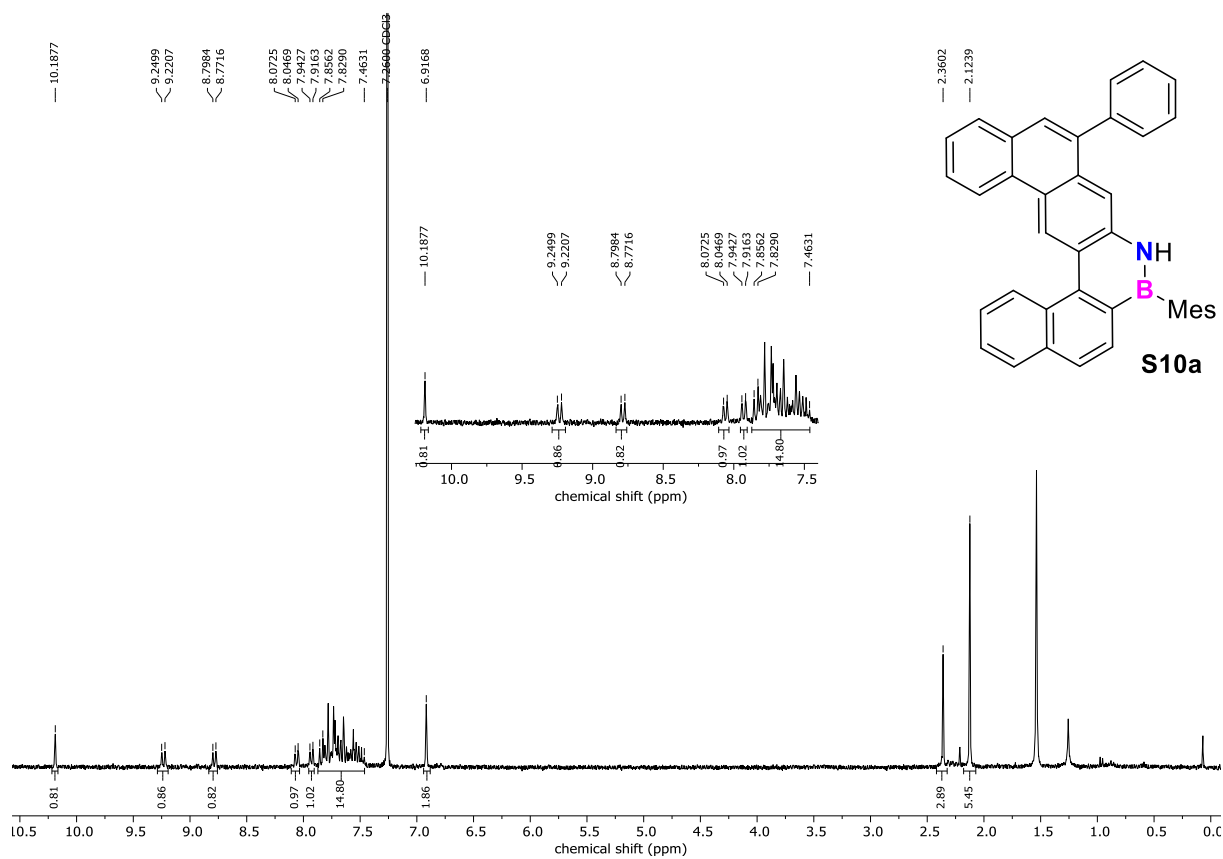

**$^{13}\text{C}$  NMR (126 MHz,  $\text{CDCl}_3$ )**

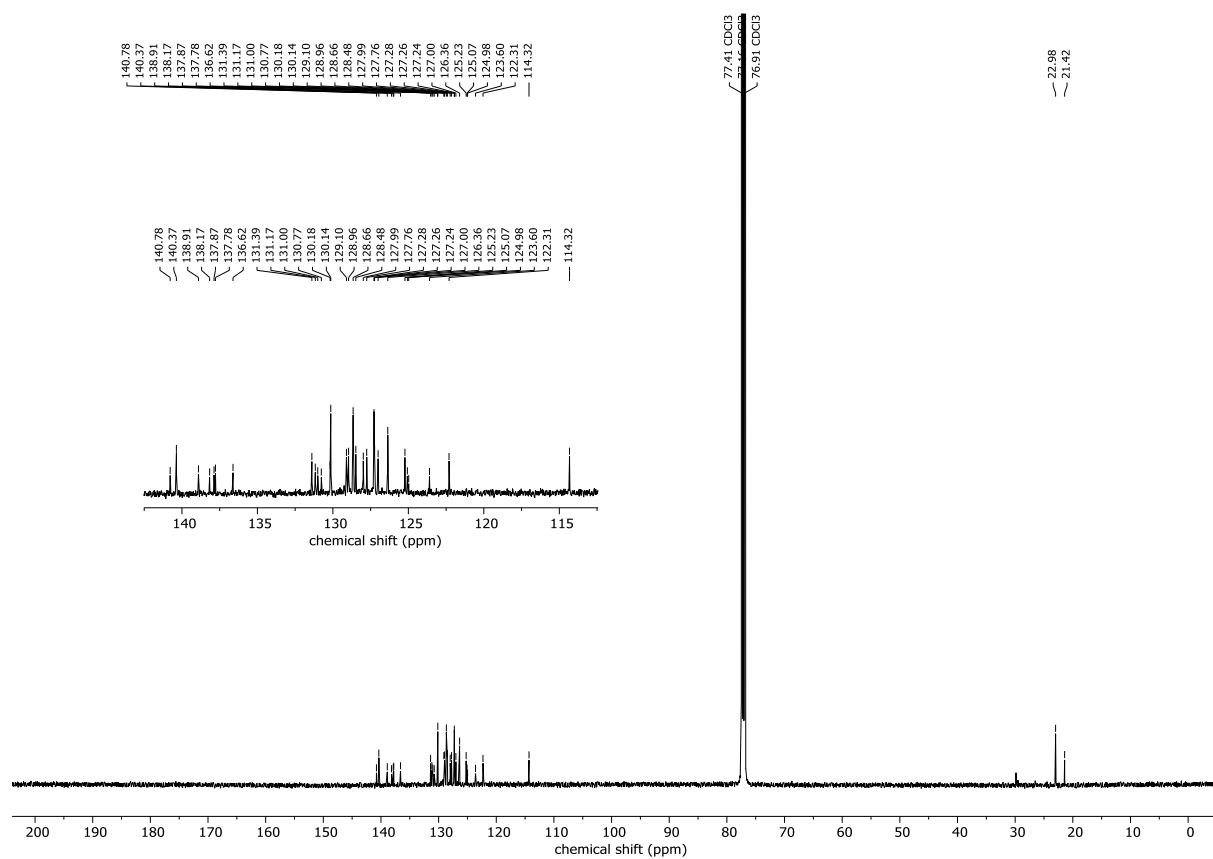

**$^{11}\text{B}$  NMR (161 MHz,  $\text{CDCl}_3$ )**

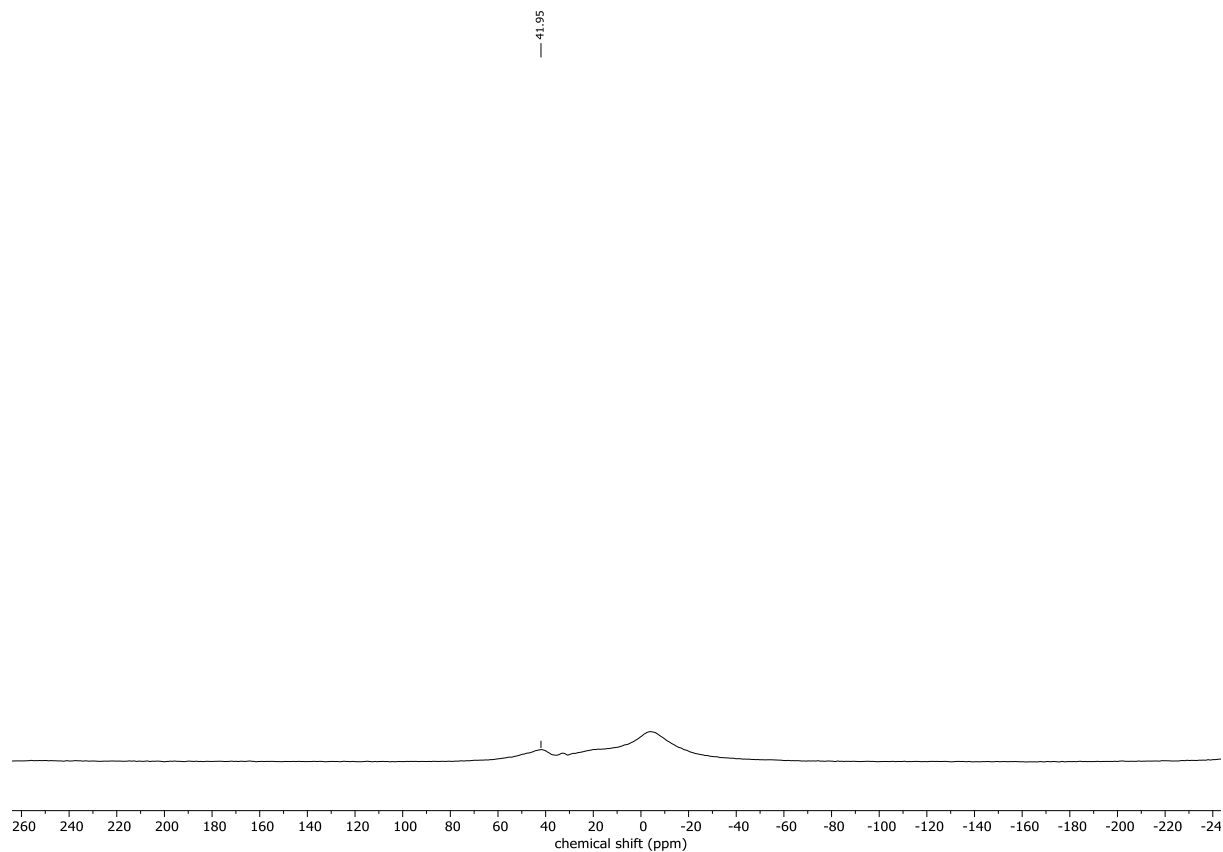

# <sup>1</sup>H NMR (400 MHz, CD<sub>2</sub>Cl<sub>2</sub>) 10b

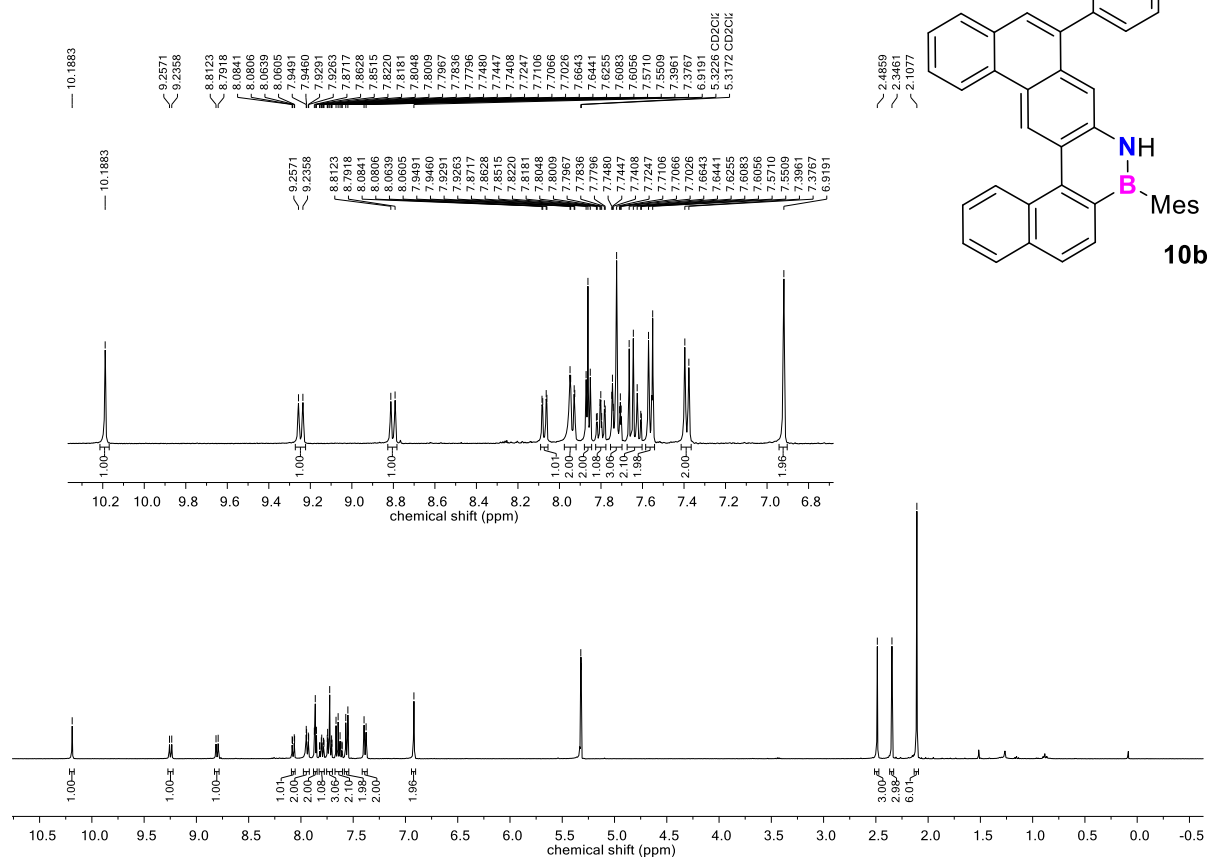

# <sup>13</sup>C NMR (101 MHz, CD<sub>2</sub>Cl<sub>2</sub>)

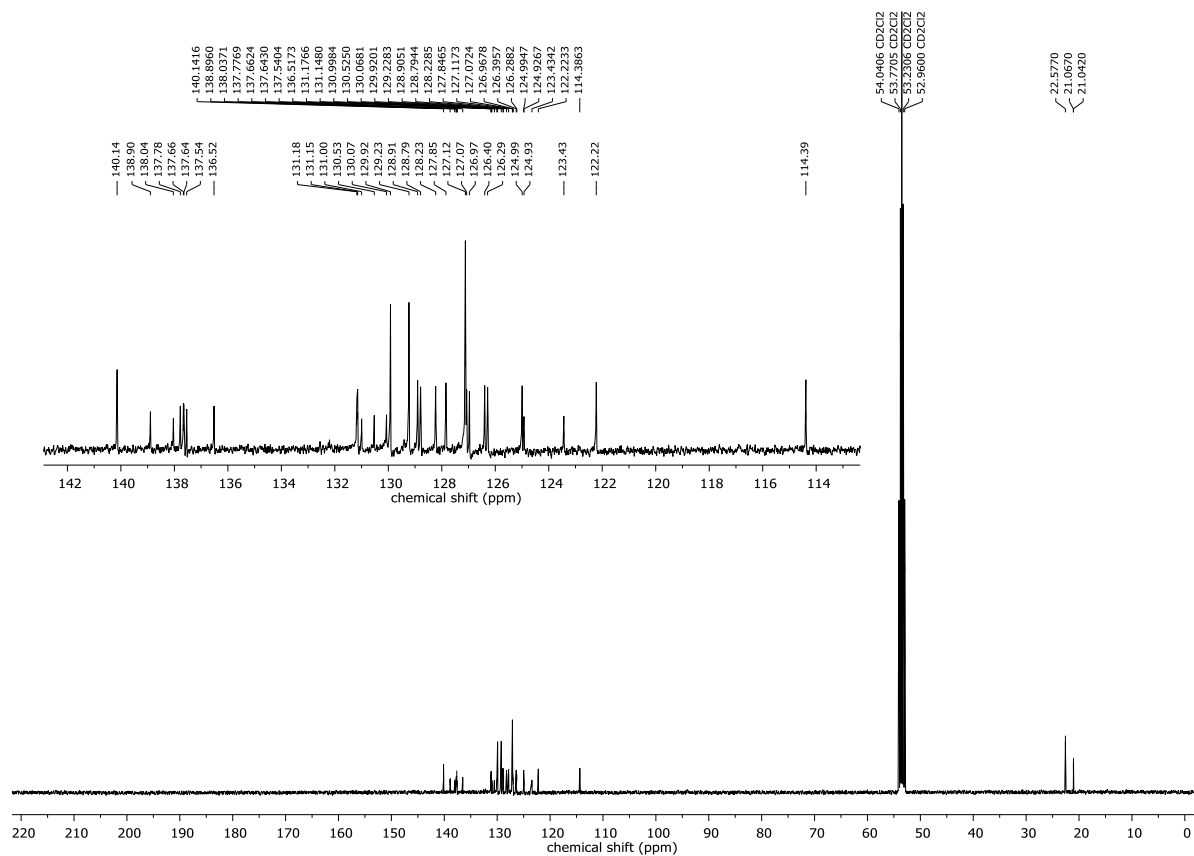

**$^{11}\text{B}$  NMR (161 MHz,  $\text{CD}_2\text{Cl}_2$ )**

—41.15

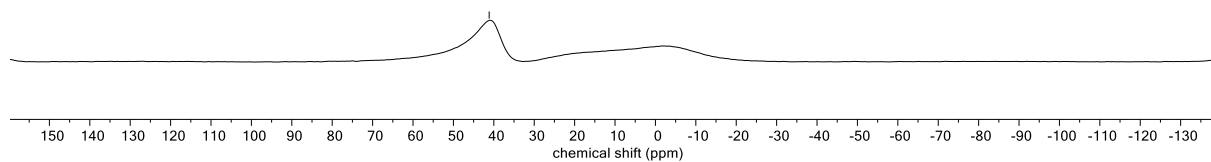

# <sup>1</sup>H NMR (400 MHz, CD<sub>2</sub>Cl<sub>2</sub>) S10c

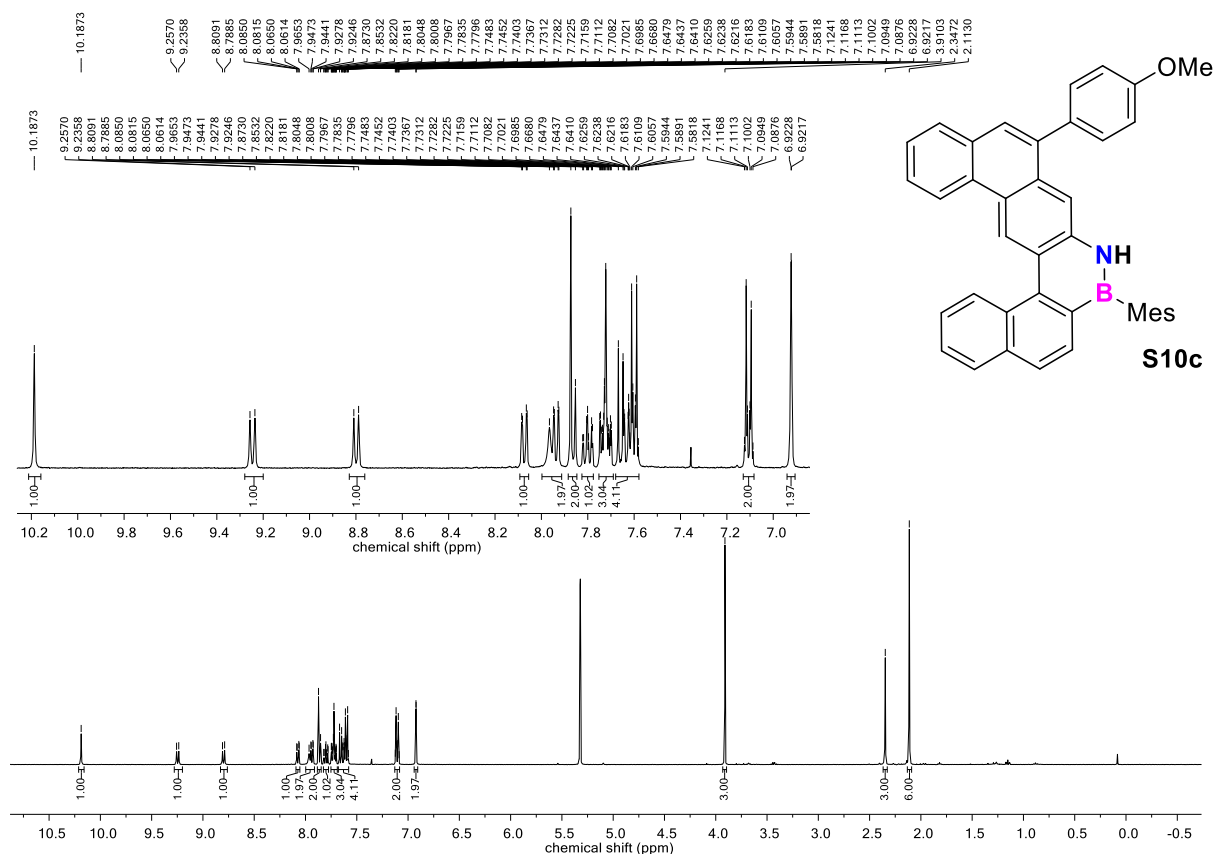

# <sup>13</sup>C NMR (101 MHz, CD<sub>2</sub>Cl<sub>2</sub>)

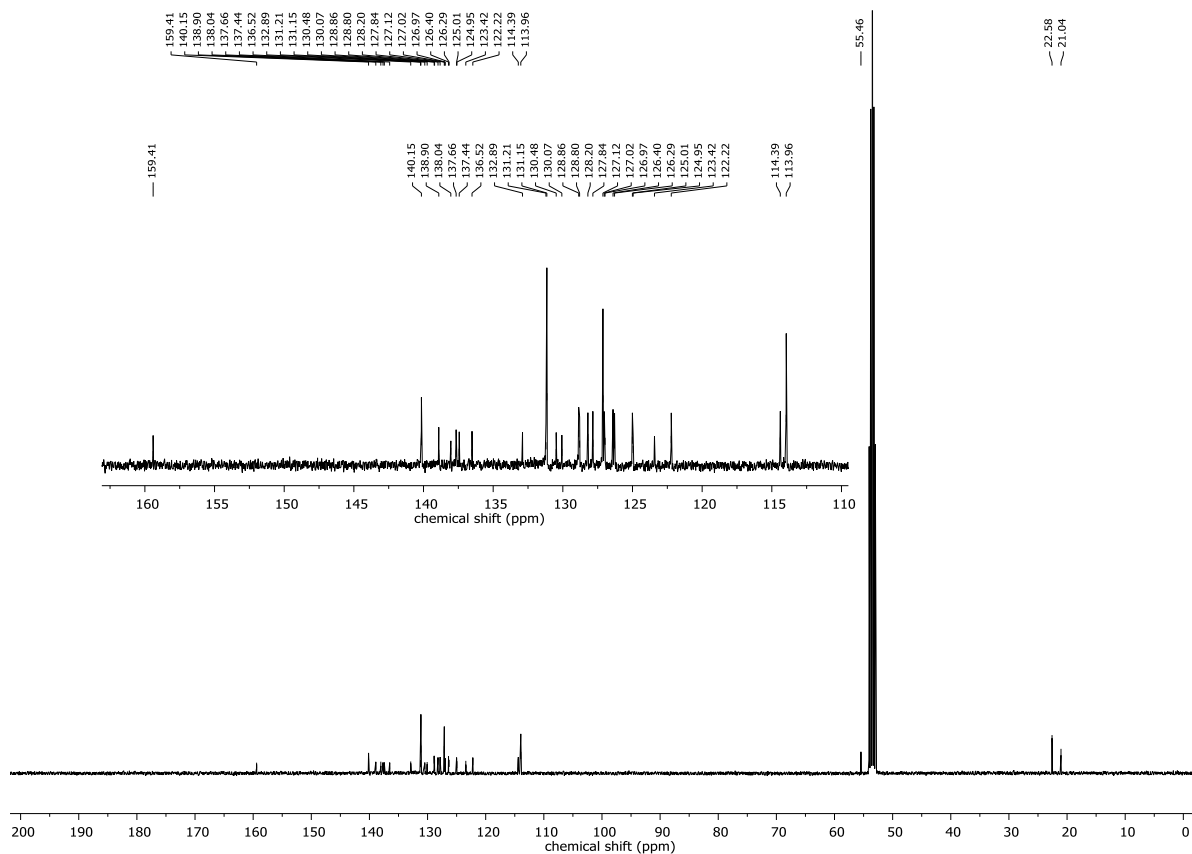

**$^{11}\text{B}$  NMR** (161 MHz,  $\text{CD}_2\text{Cl}_2$ )

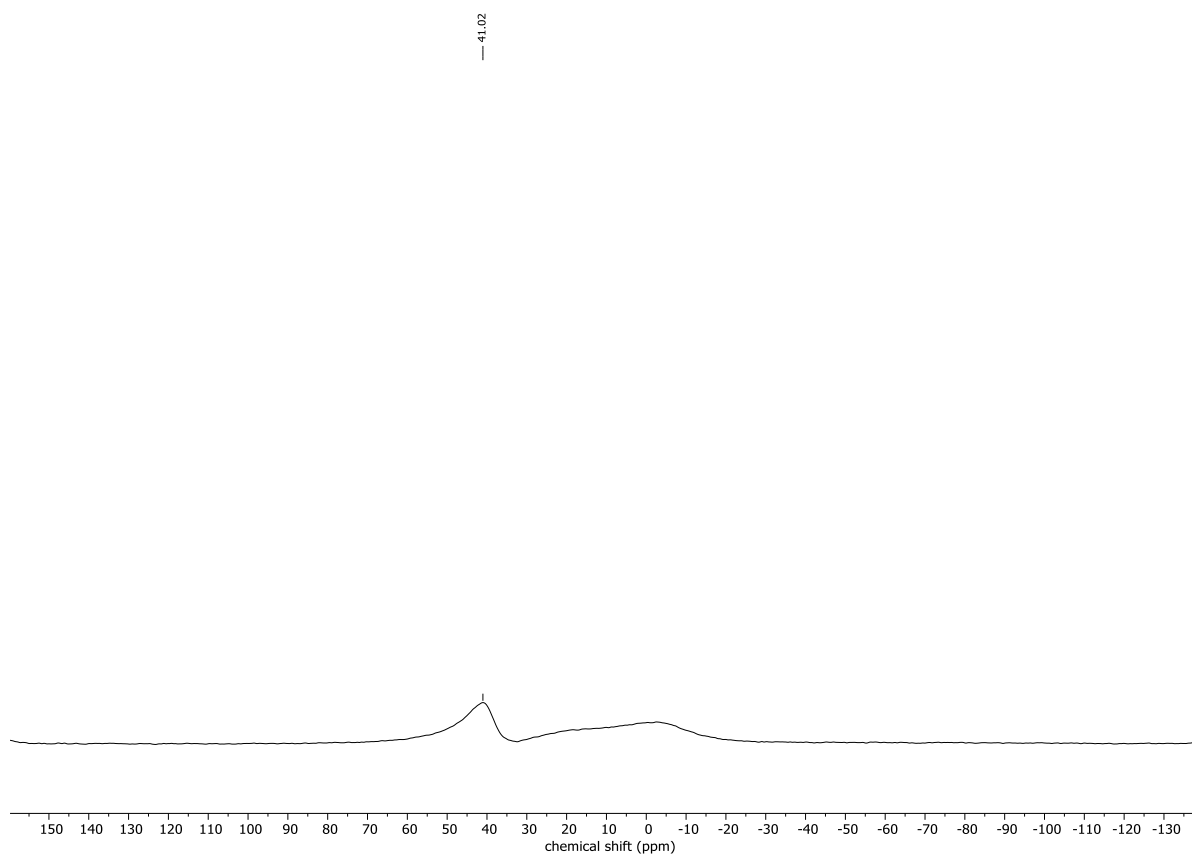

# <sup>1</sup>H NMR (400 MHz, CD<sub>2</sub>Cl<sub>2</sub>) S10d

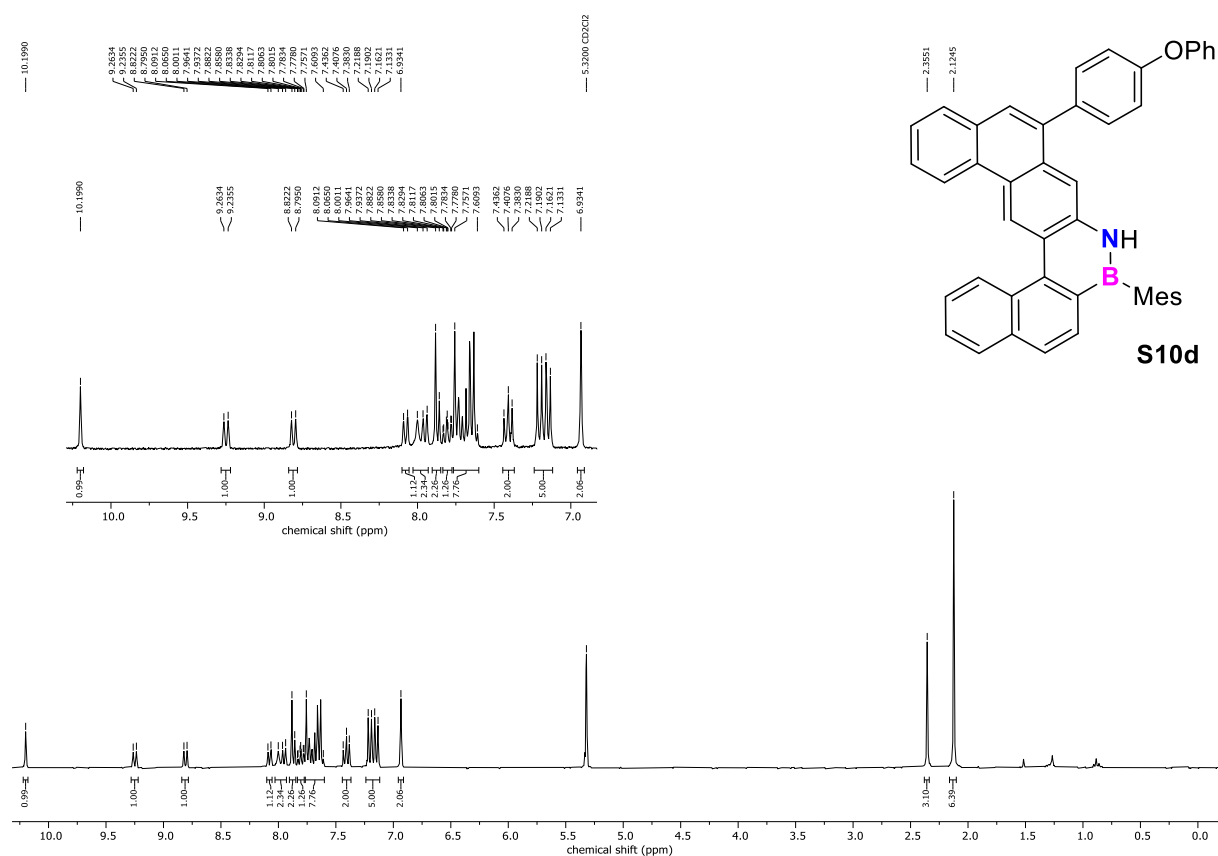

# <sup>13</sup>C NMR (101 MHz, CD<sub>2</sub>Cl<sub>2</sub>)

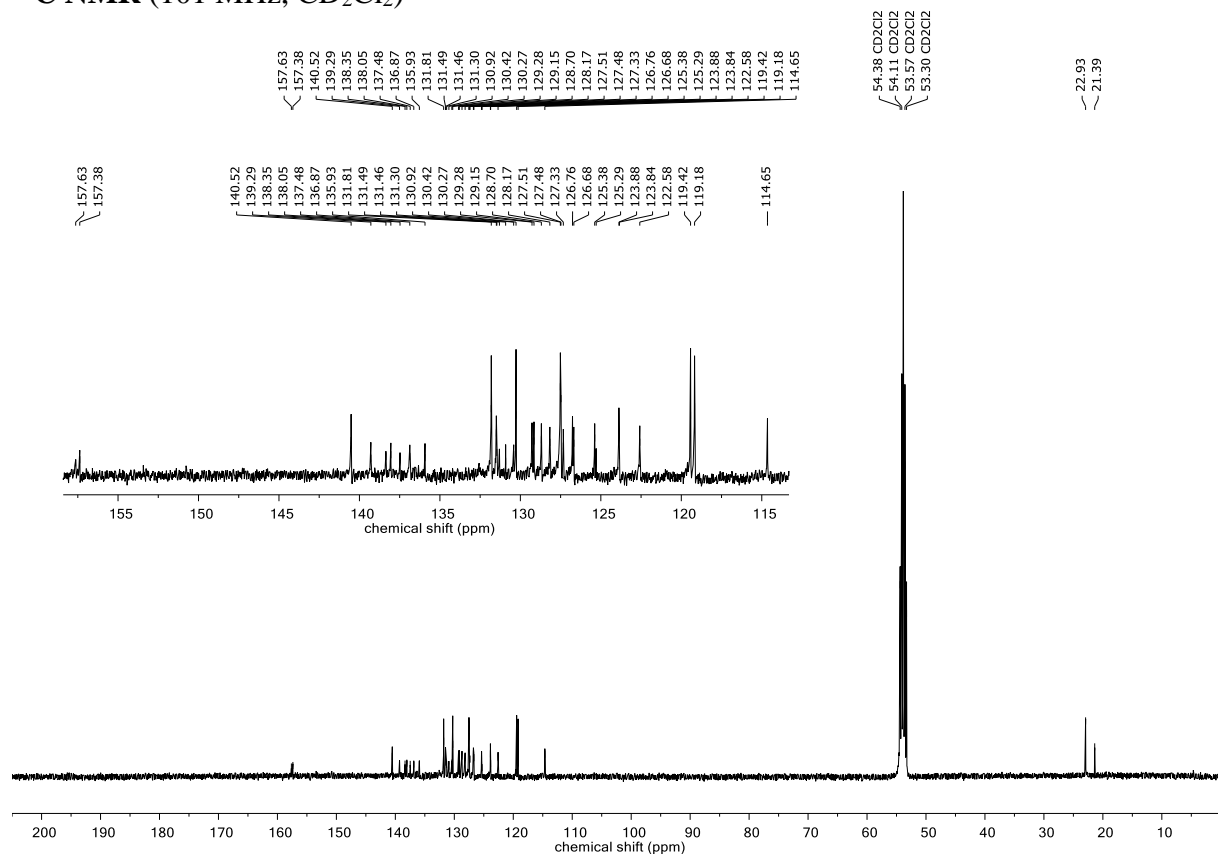

**$^{11}\text{B}$  NMR (161 MHz,  $\text{CD}_2\text{Cl}_2$ )**

—40.99

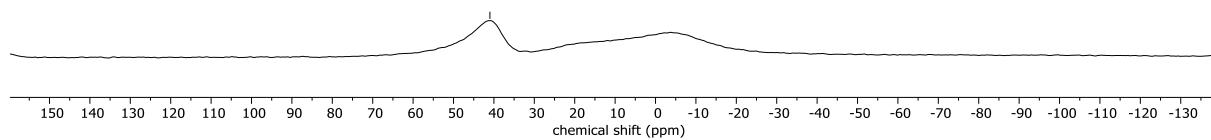

# <sup>1</sup>H NMR (500 MHz, CD<sub>2</sub>Cl<sub>2</sub>) S10e

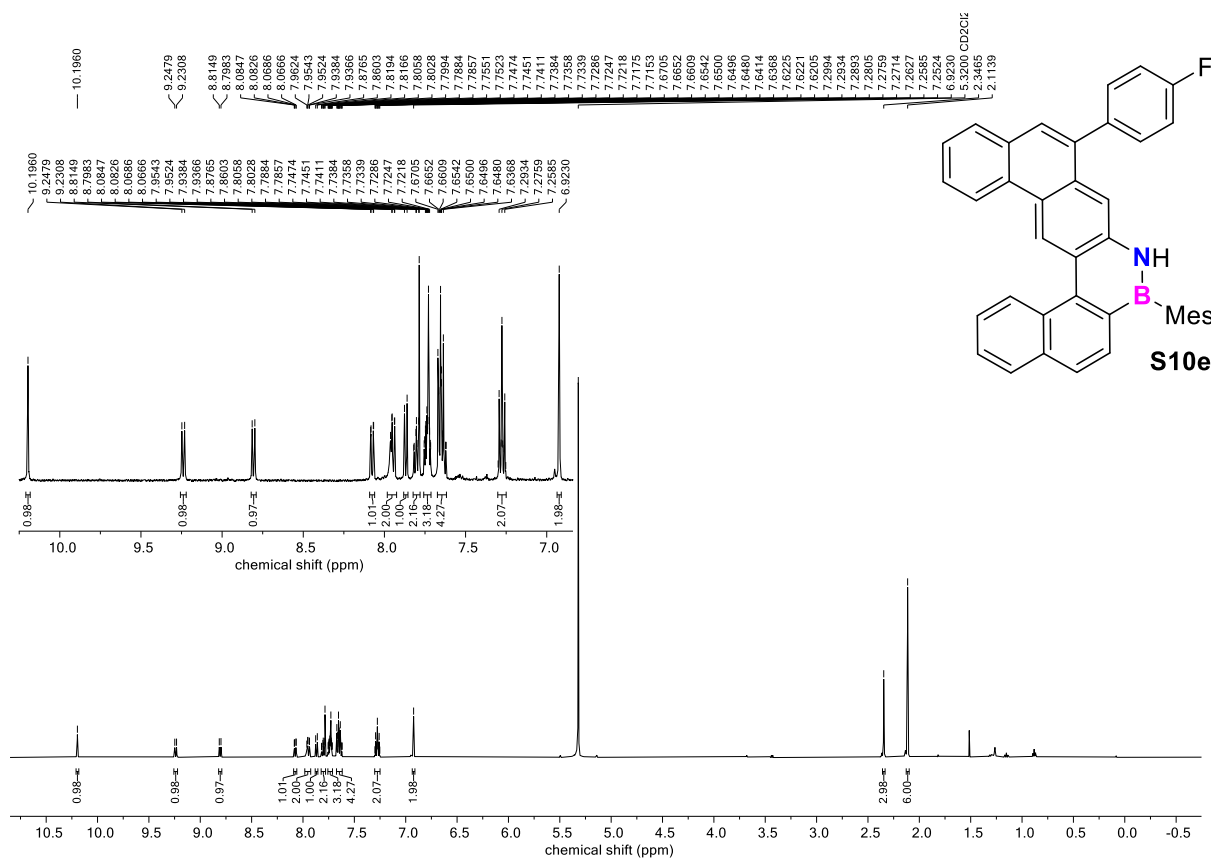

**$^{11}\text{B}$  NMR (161 MHz,  $\text{CD}_2\text{Cl}_2$ )**

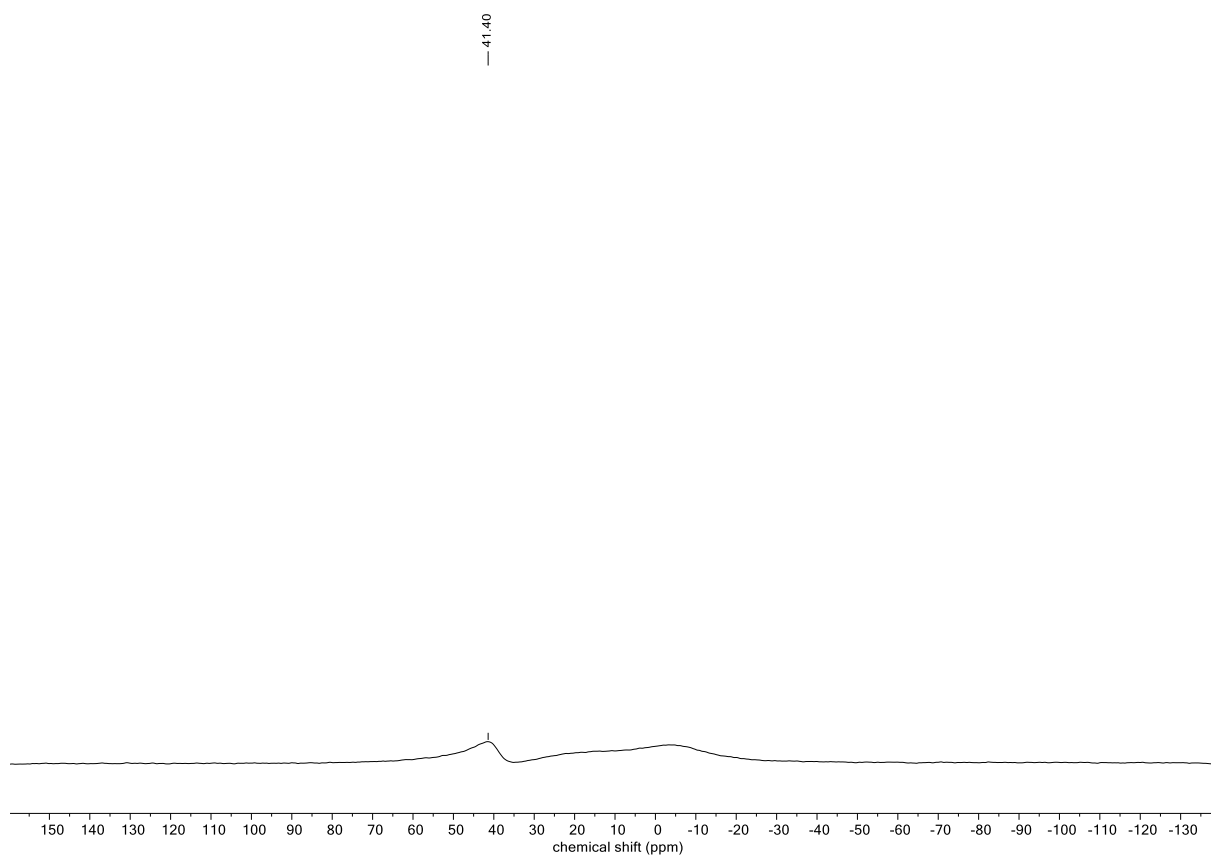

**$^{19}\text{F}$  NMR (282 MHz,  $\text{CD}_2\text{Cl}_2$ )**

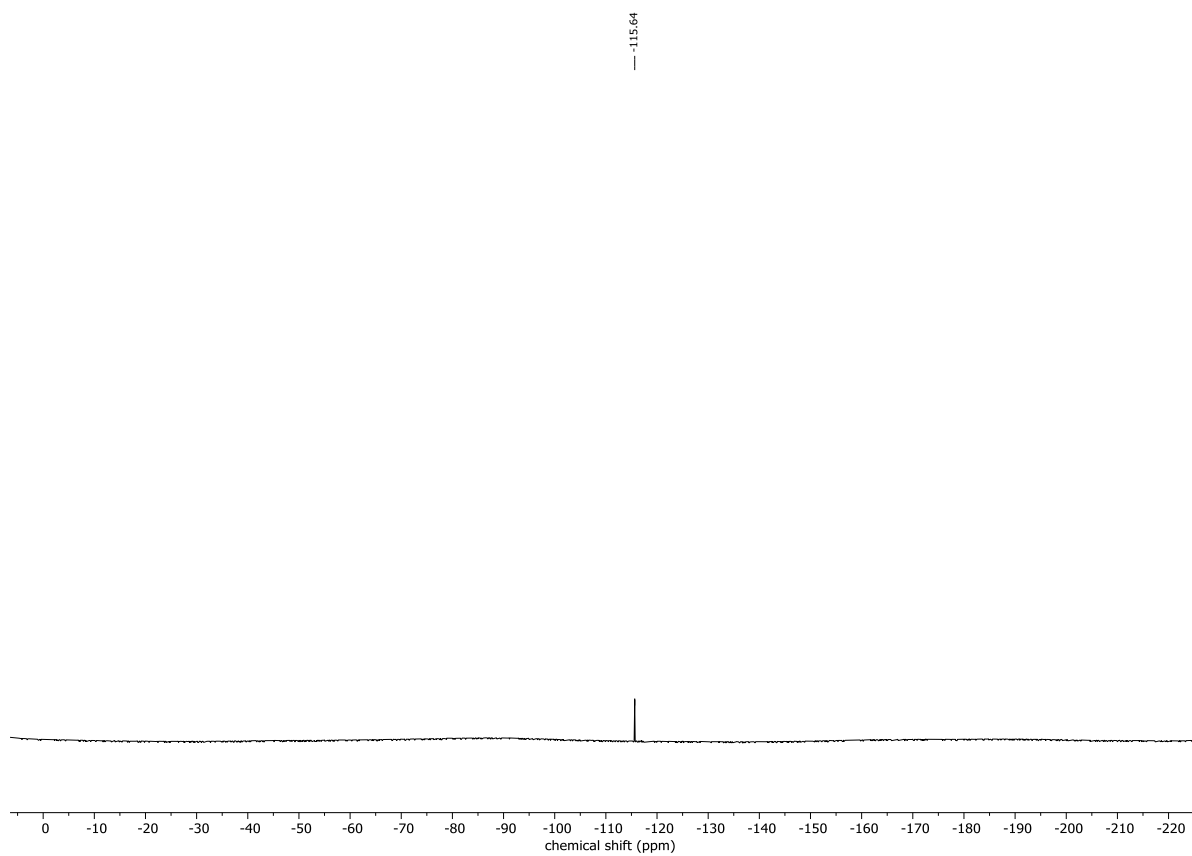



**$^{11}\text{B}$  NMR (128 MHz,  $\text{CDCl}_3$ )**

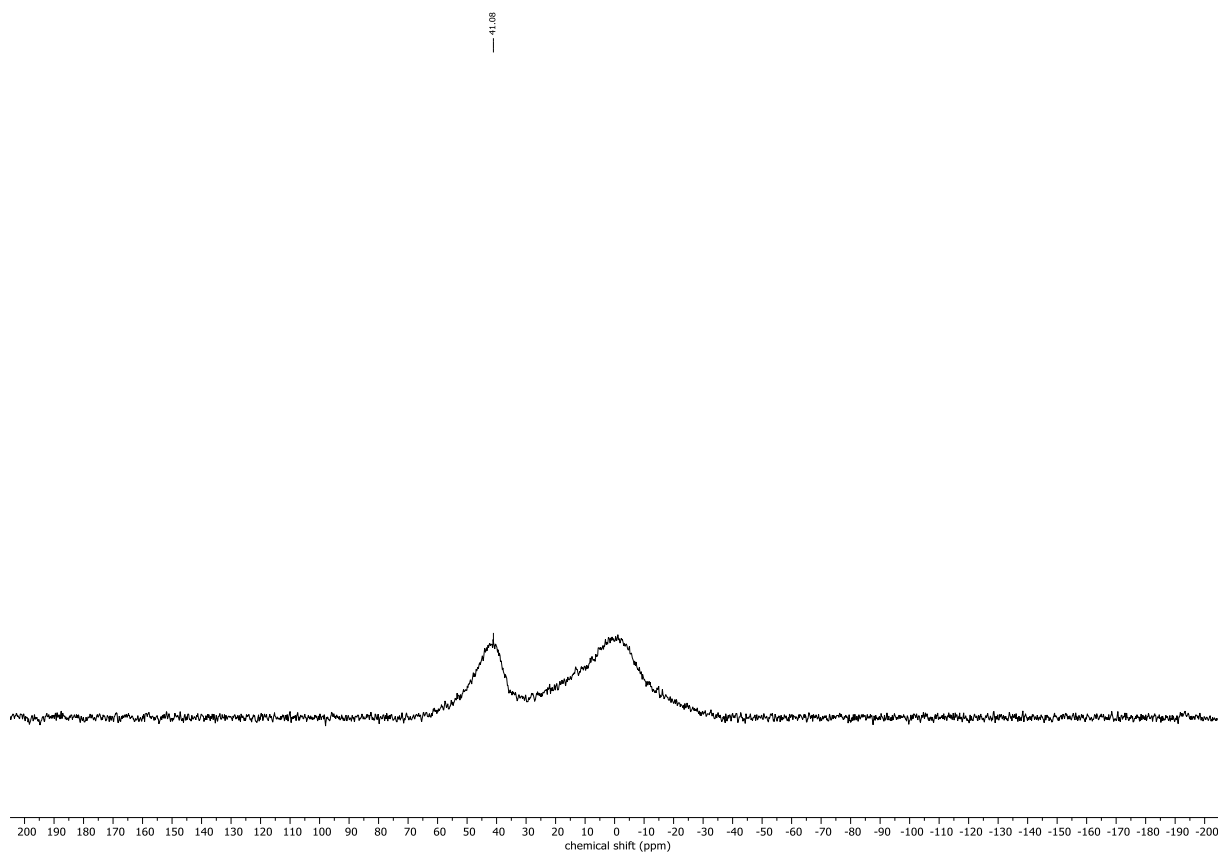



**$^{11}\text{B}$  NMR (161 MHz,  $\text{CD}_2\text{Cl}_2$ )**

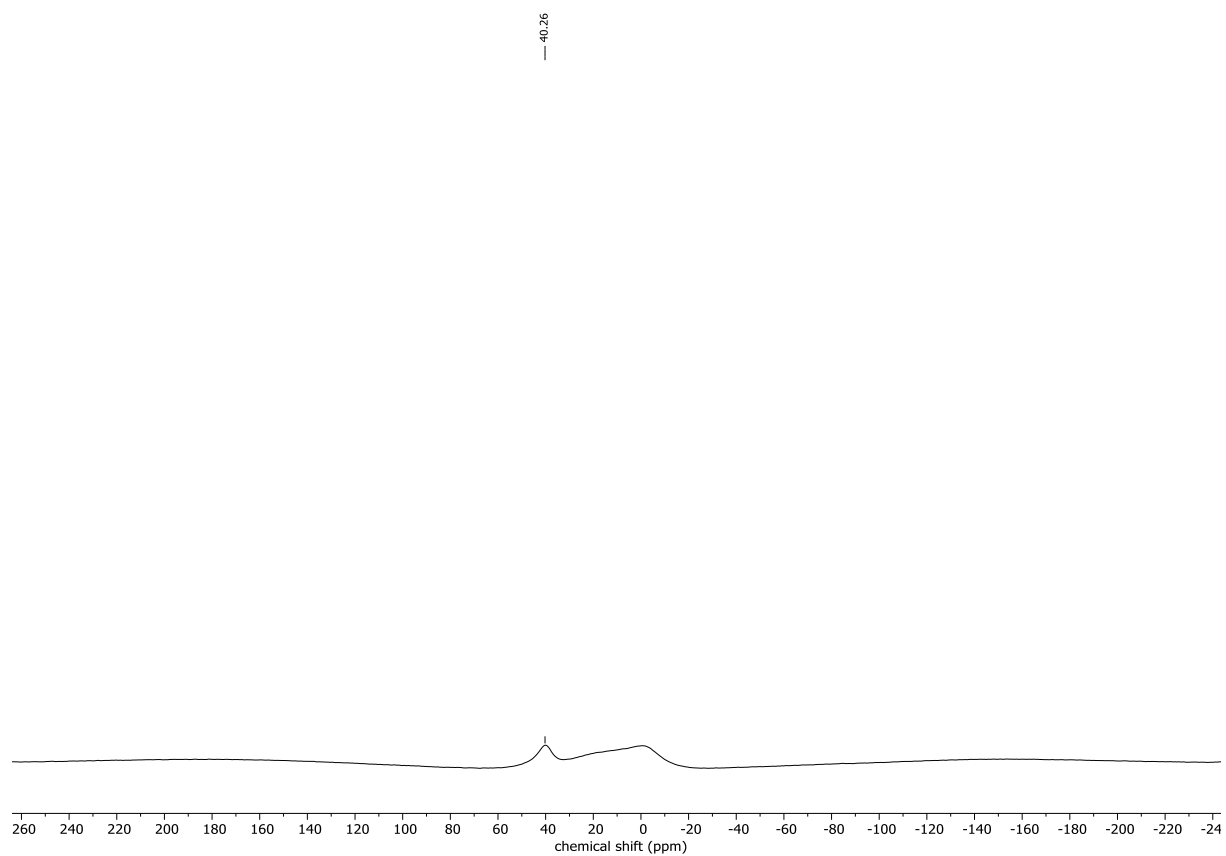

# <sup>1</sup>H NMR (400 MHz, CDCl<sub>3</sub>) S10b(BPh)

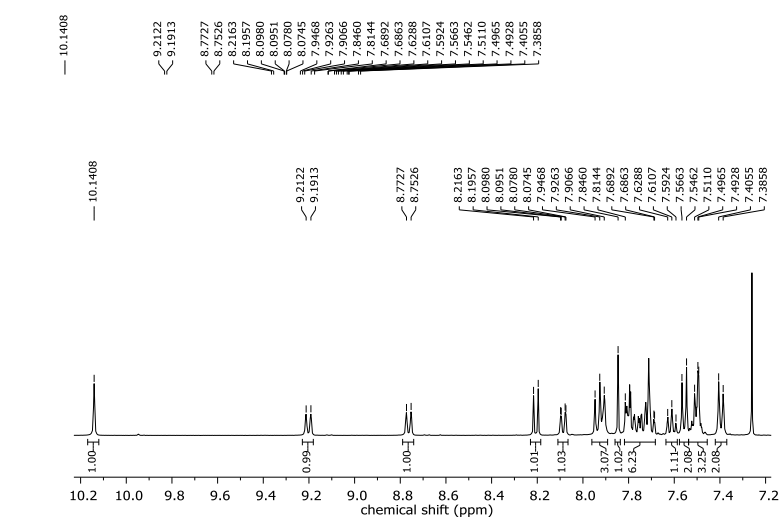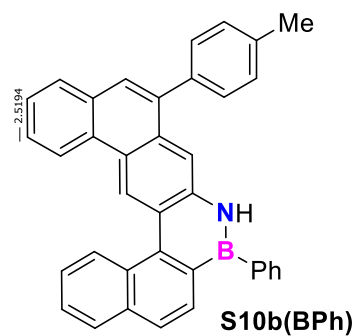

# <sup>13</sup>C NMR (101 MHz, CDCl<sub>3</sub>)

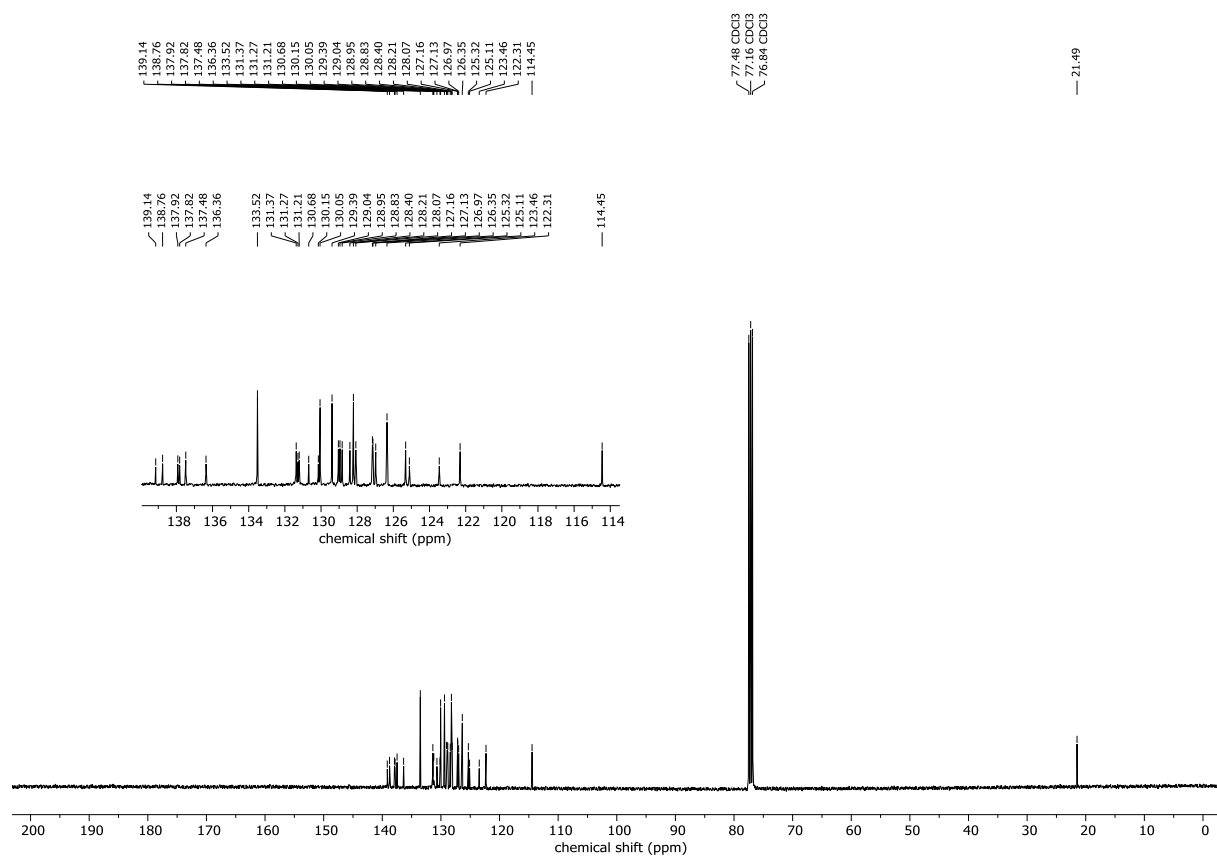

**$^{11}\text{B}$  NMR (161 MHz,  $\text{CDCl}_3$ )**

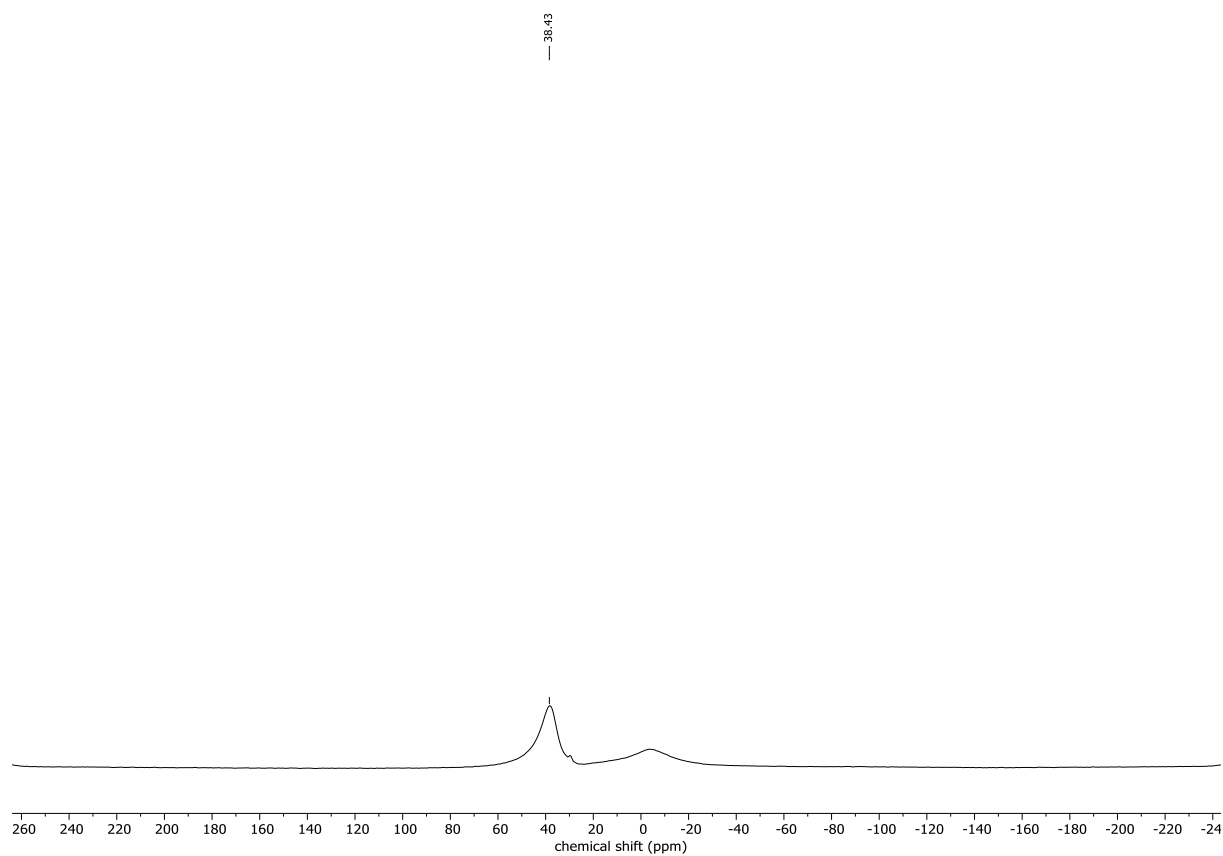

# <sup>1</sup>H NMR (500 MHz, CD<sub>2</sub>Cl<sub>2</sub>) S10b(NMe)

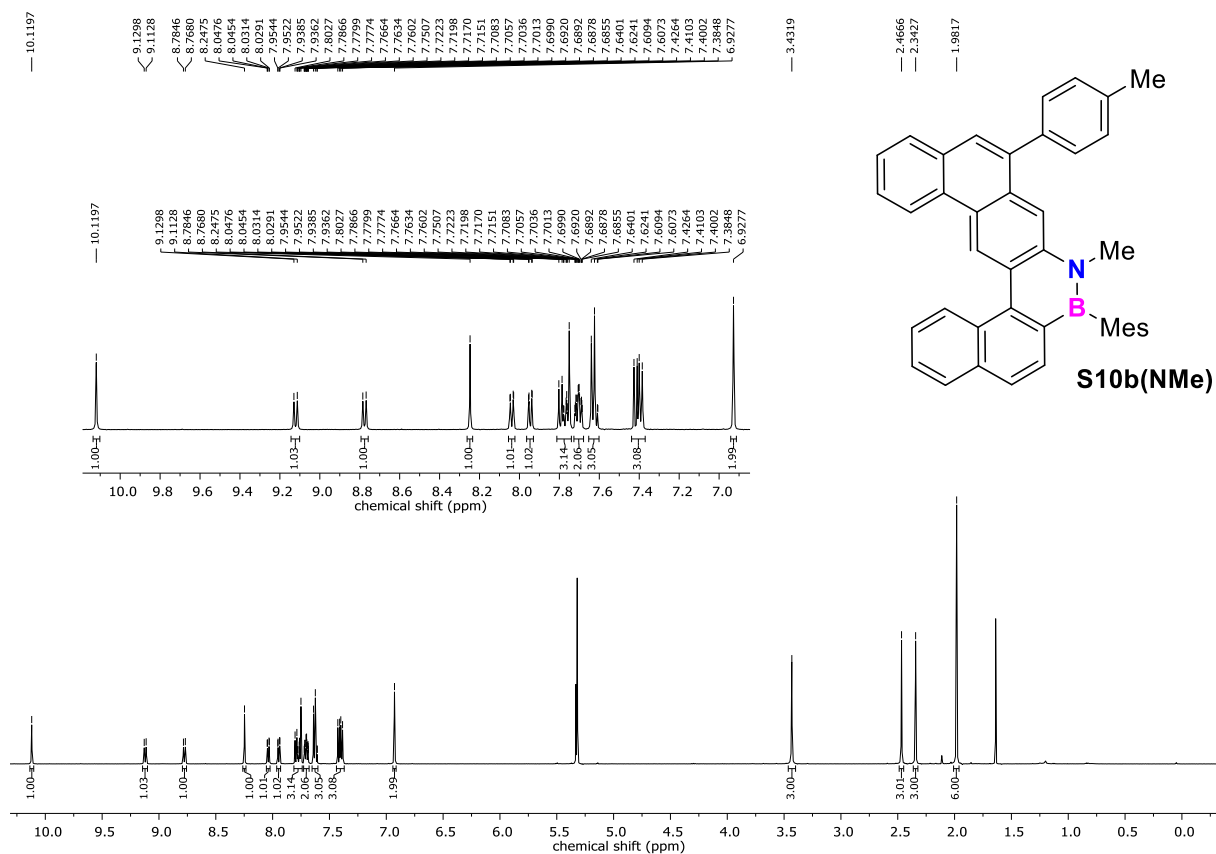

# <sup>13</sup>C NMR (126 MHz, CD<sub>2</sub>Cl<sub>2</sub>)

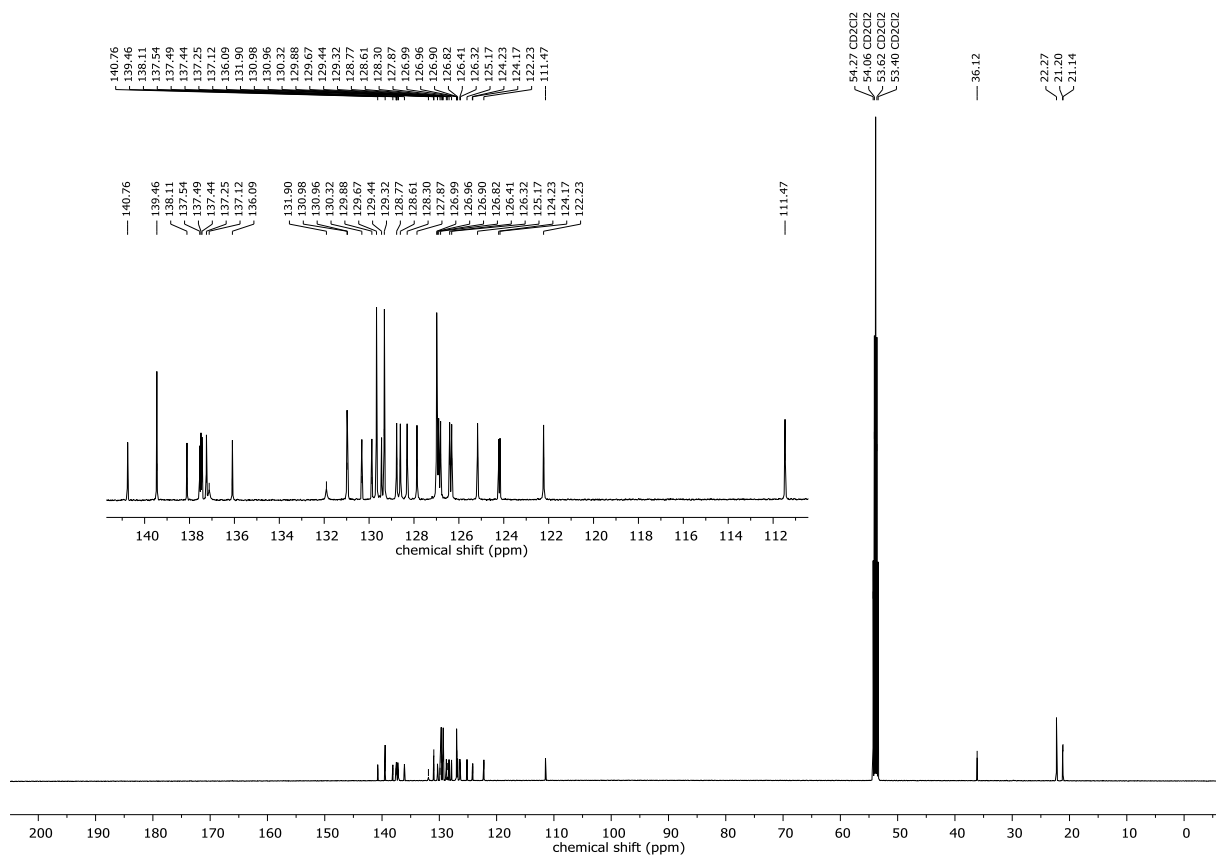

**$^{11}\text{B}$  NMR** (161 MHz,  $\text{CD}_2\text{Cl}_2$ )

—40.37

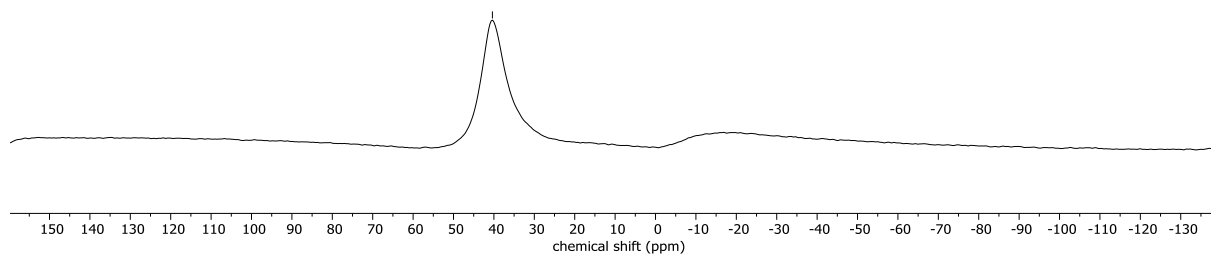

# <sup>1</sup>H NMR (400 MHz, CDCl<sub>3</sub>) 11b

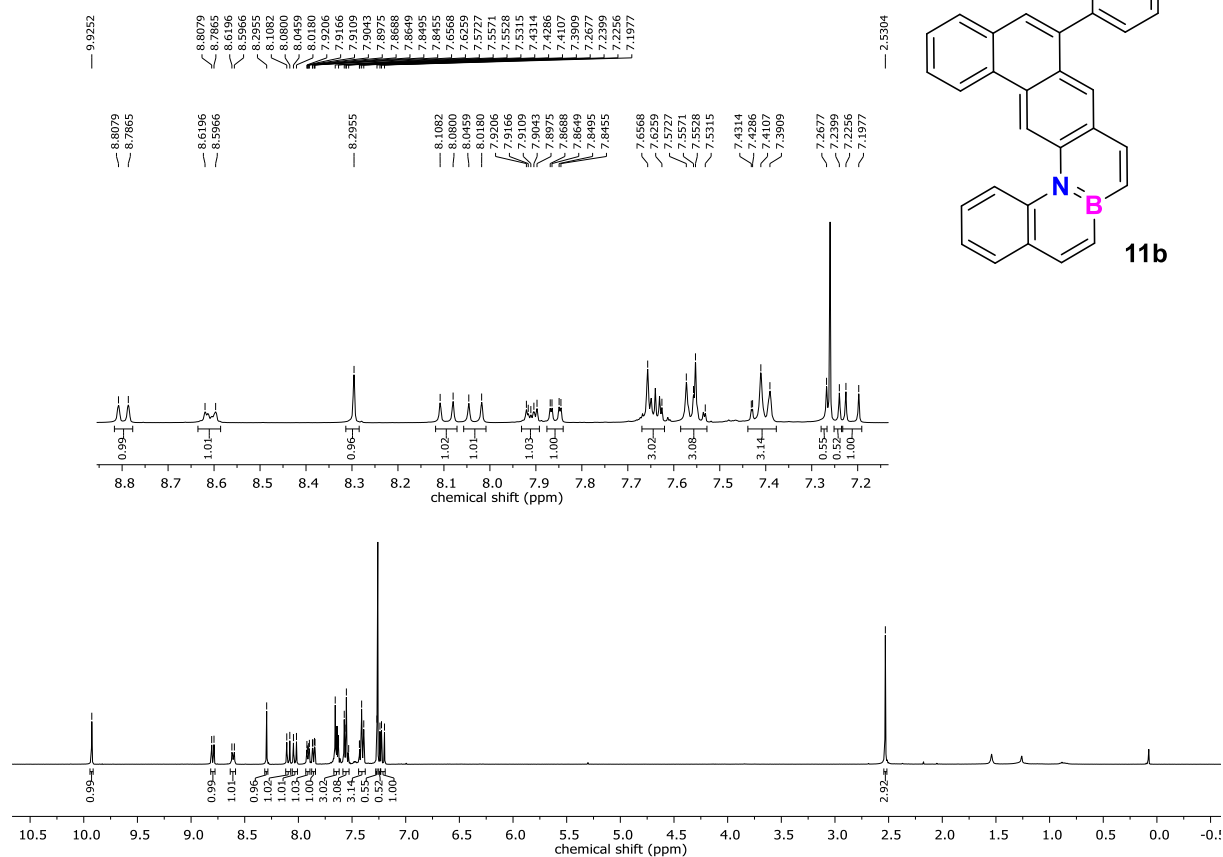

# <sup>13</sup>C NMR (101 MHz, CDCl<sub>3</sub>)

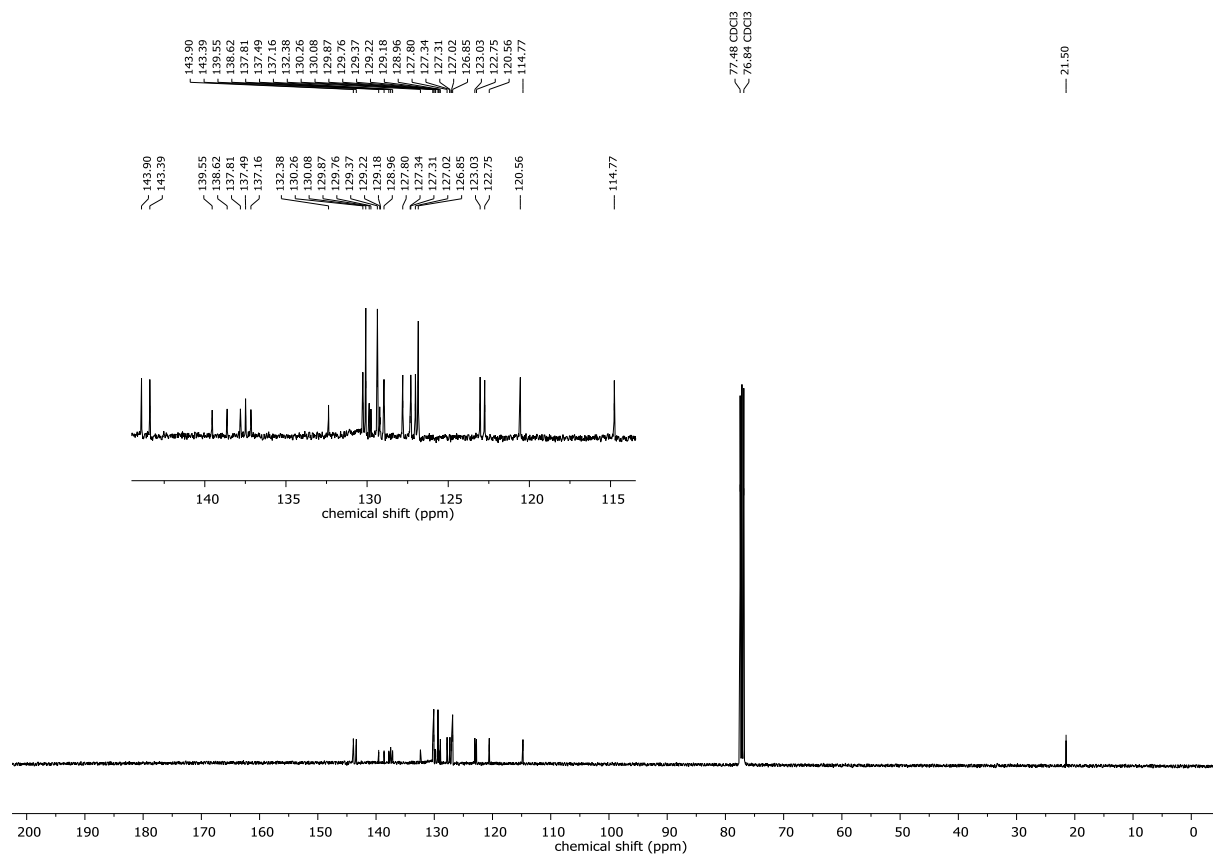

**$^{11}\text{B}$  NMR (161 MHz,  $\text{CDCl}_3$ )**

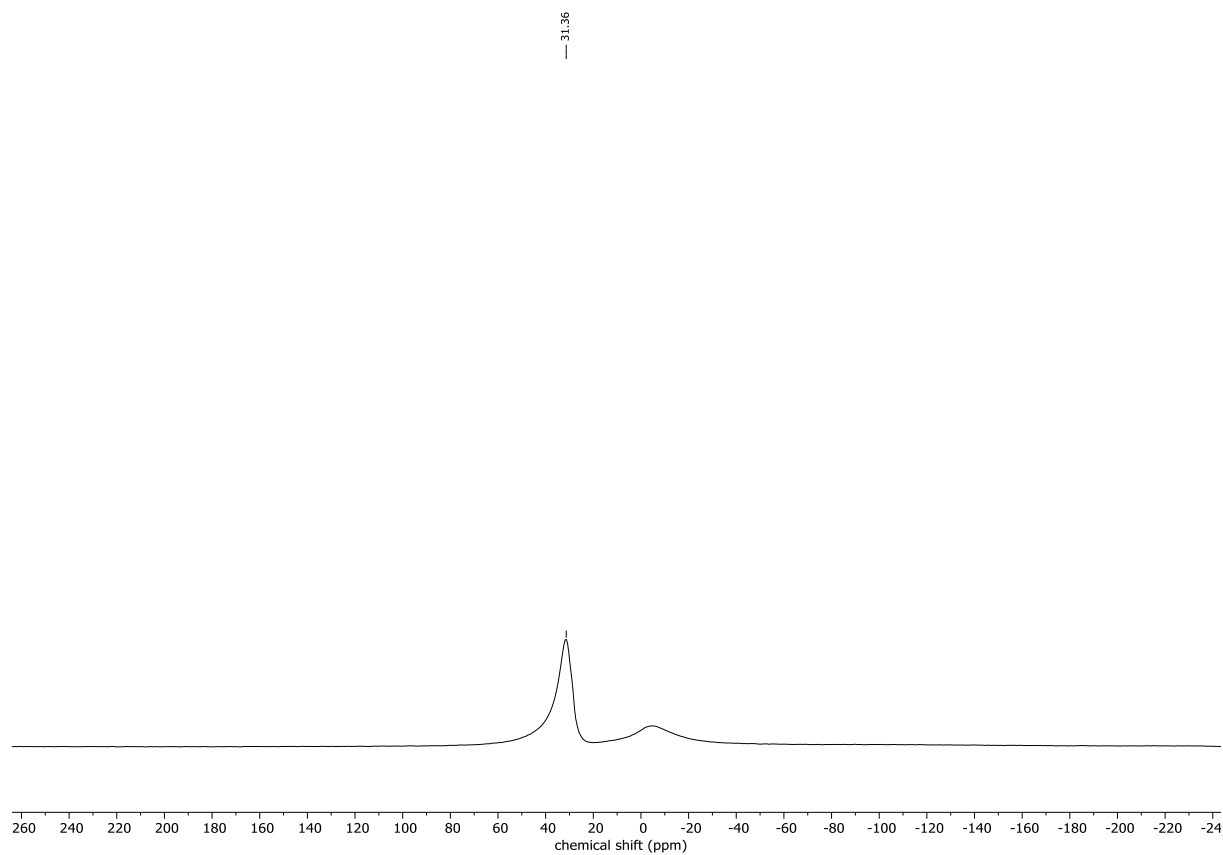



**$^{11}\text{B}$  NMR (128 MHz,  $\text{CDCl}_3$ )**

— 31.90

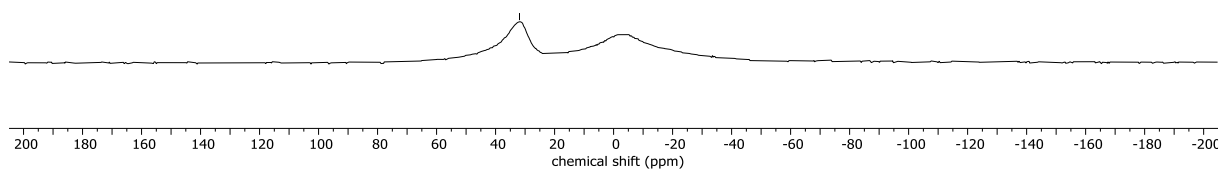



**$^{11}\text{B}$  NMR (161 MHz,  $\text{CDCl}_3$ )**

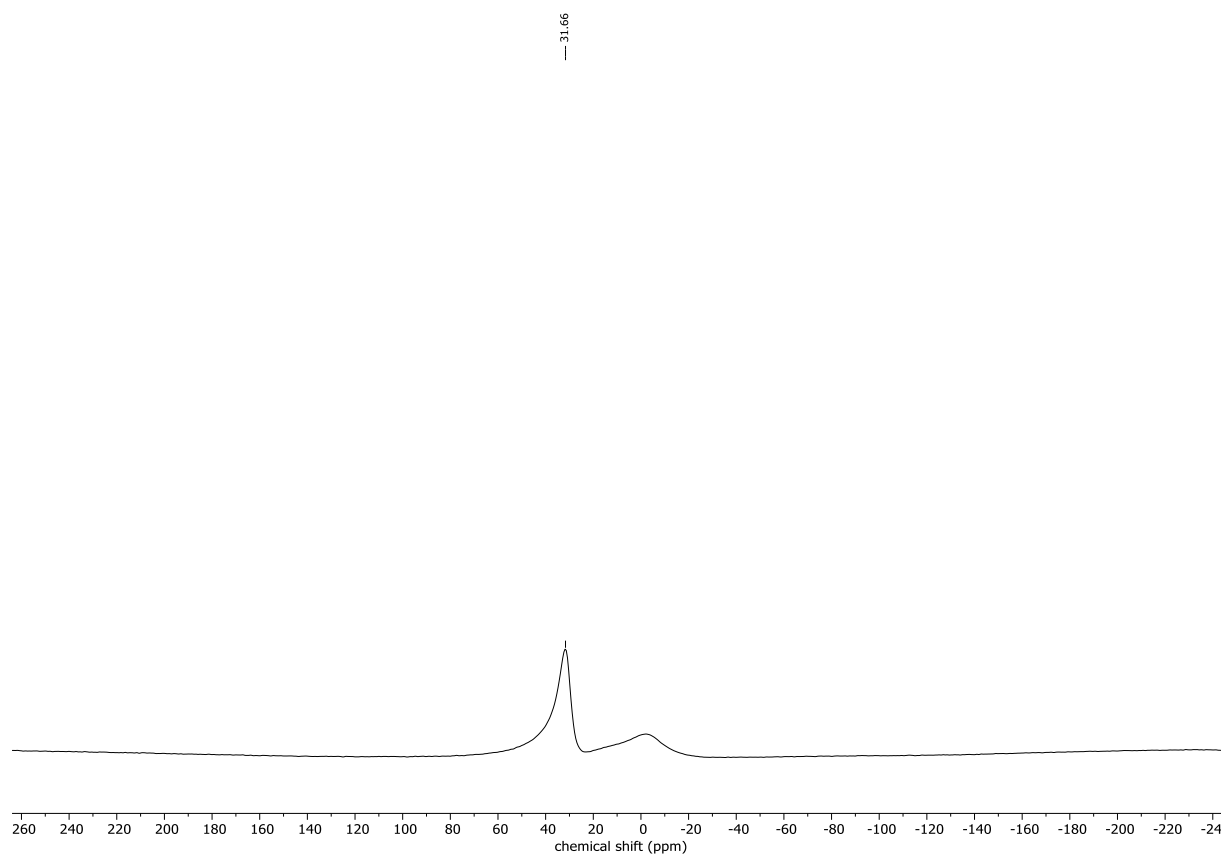

**$^{19}\text{F}$  NMR (282 MHz,  $\text{CDCl}_3$ )**

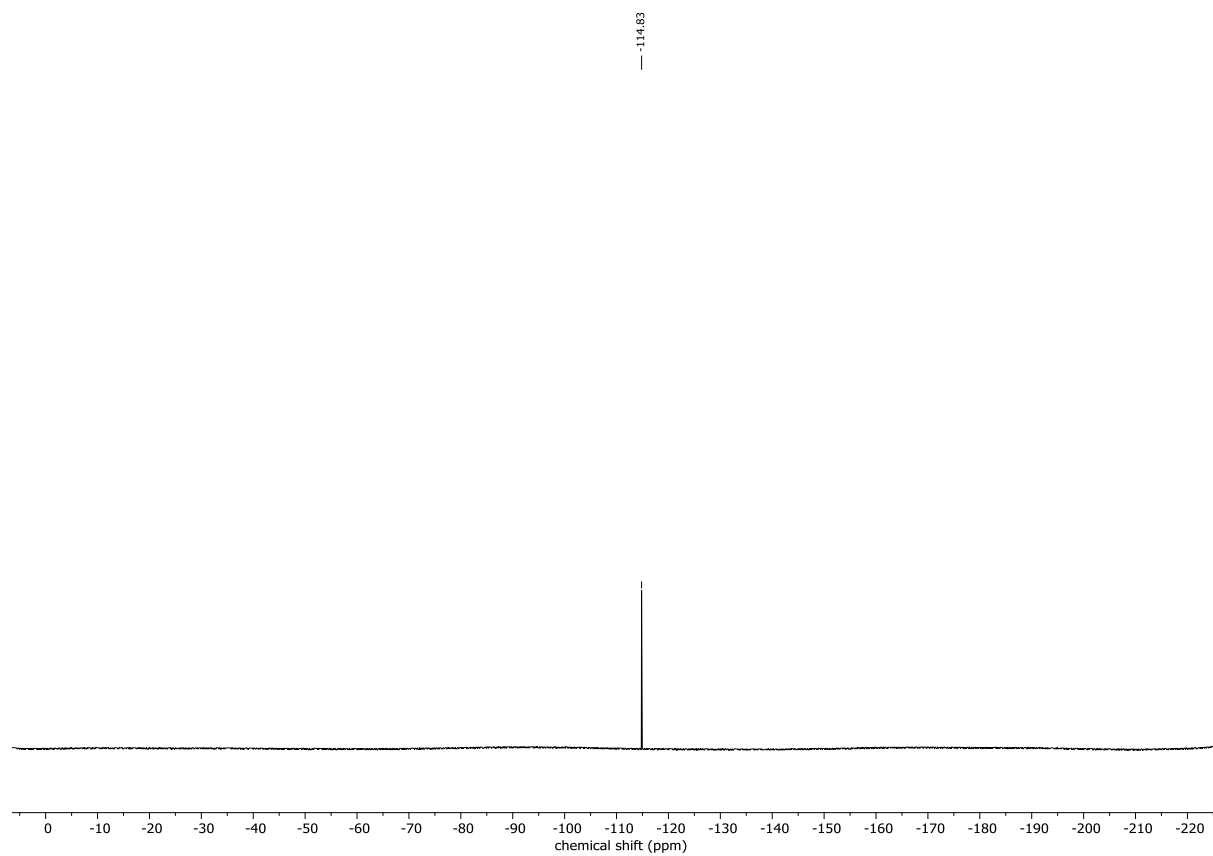

**$^1\text{H}$  NMR (500 MHz,  $\text{CD}_2\text{Cl}_2$ ,  $-35^\circ\text{C}$ ) **12b****

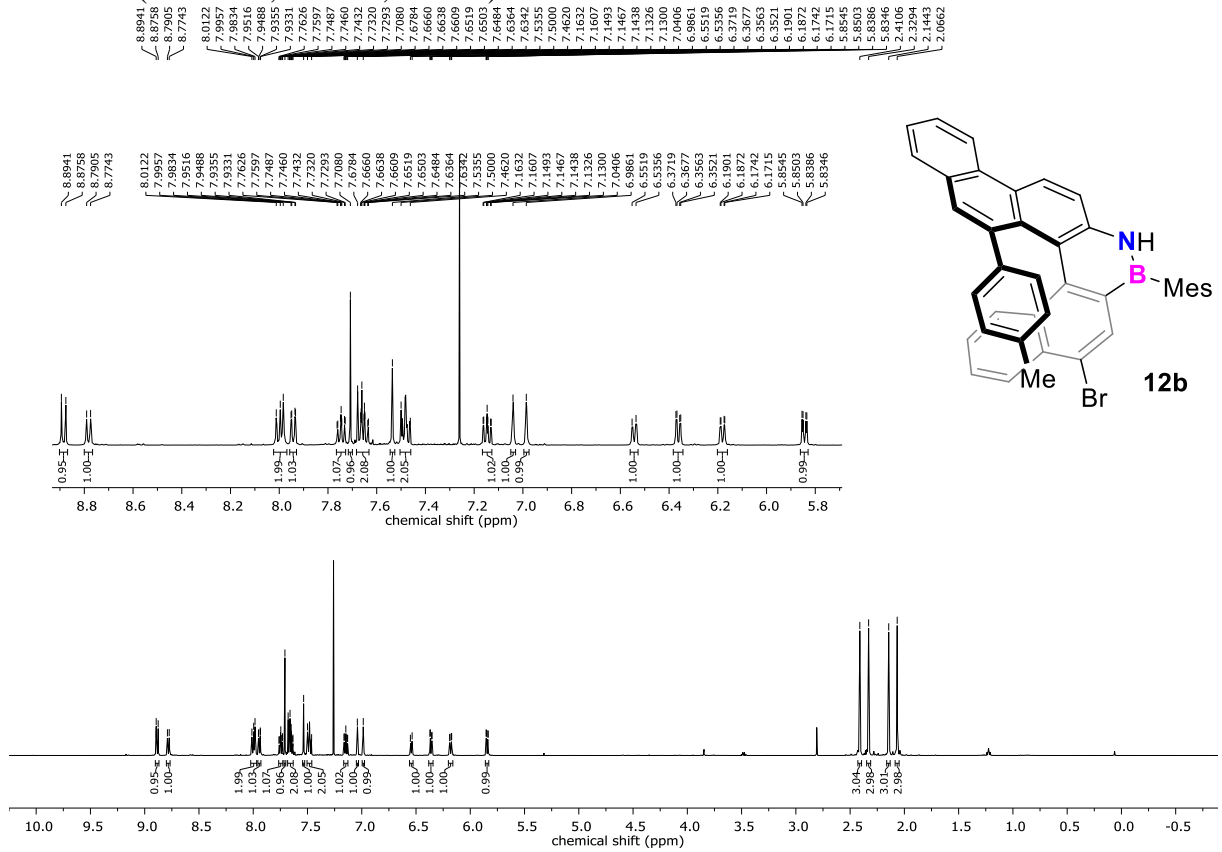

**$^1\text{H}$  NMR (300 MHz,  $\text{CDCl}_3$ ; rt)**

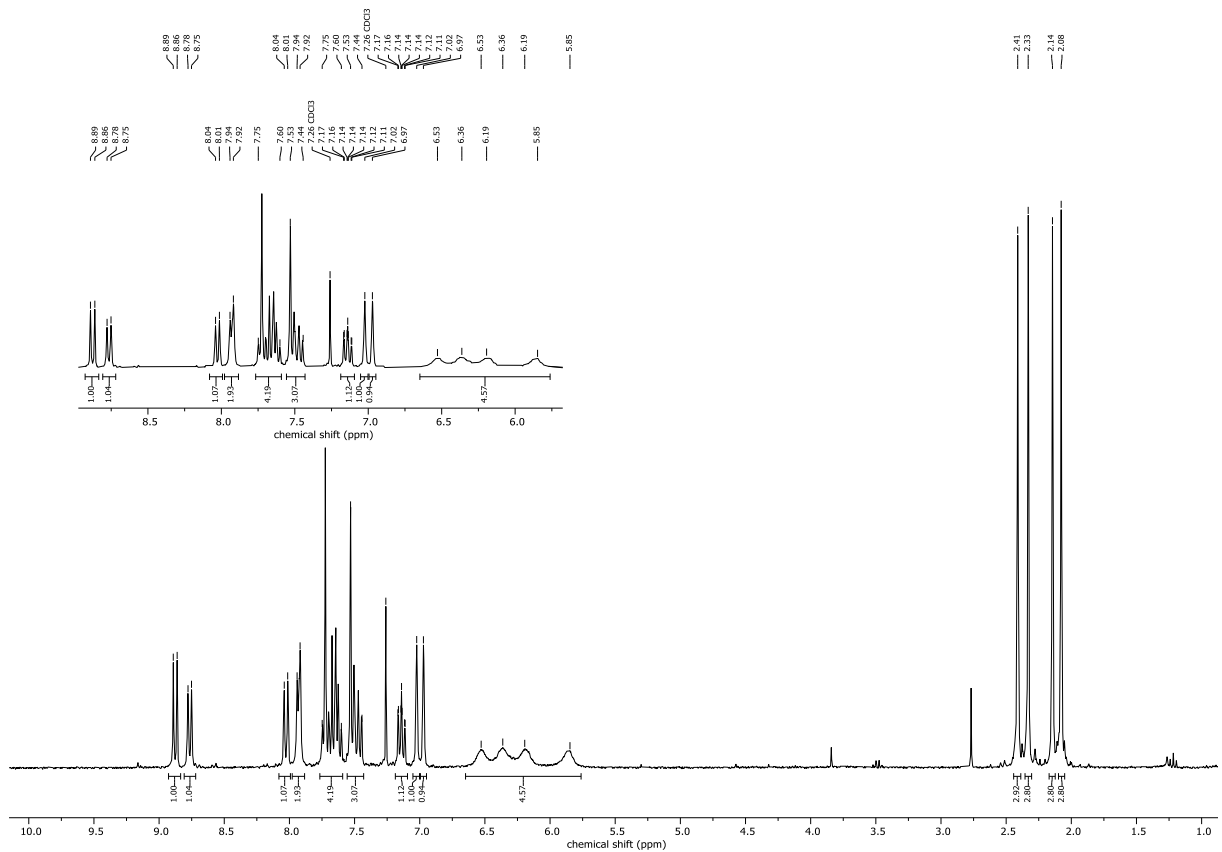

**$^{13}\text{C}$  NMR (126 MHz,  $\text{CD}_2\text{Cl}_2$ ,  $-35^\circ\text{C}$ )**

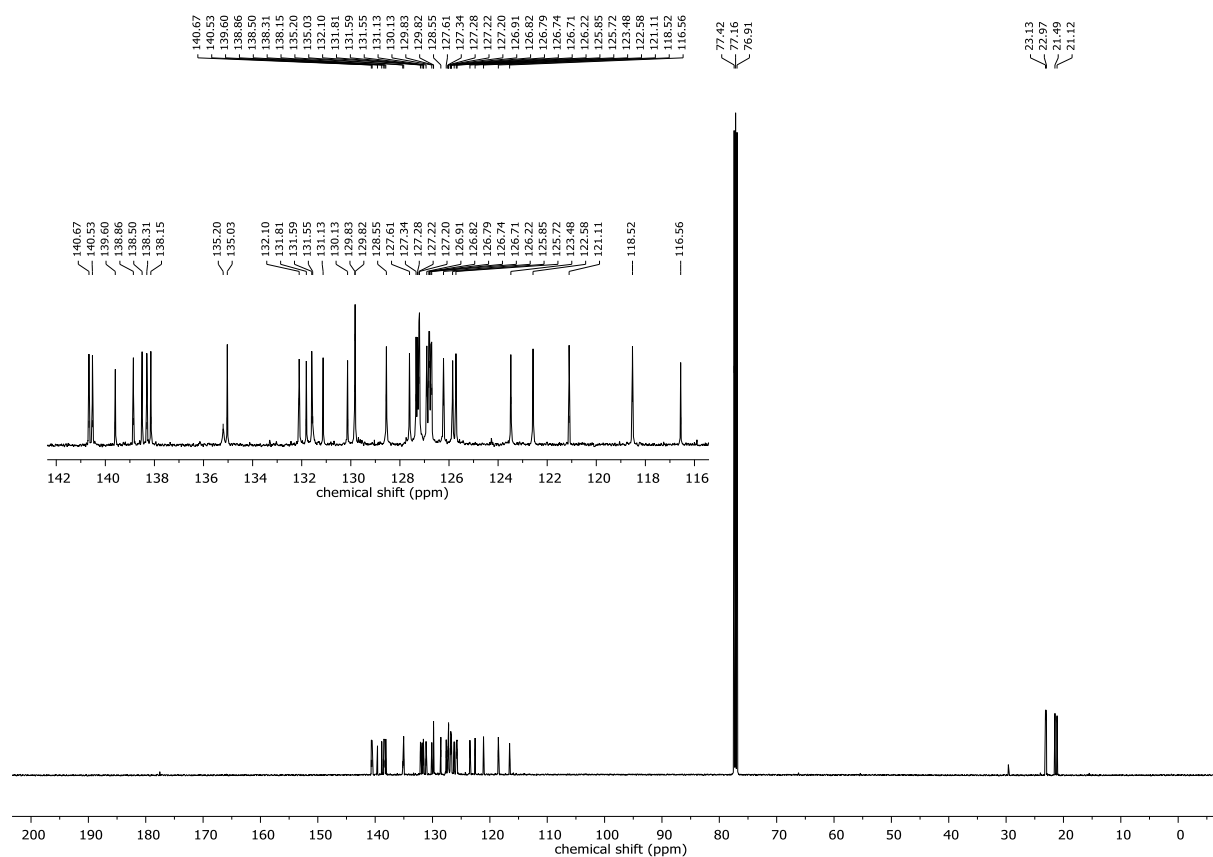

**$^{11}\text{B}$  NMR (161 MHz,  $\text{CDCl}_3$ )**

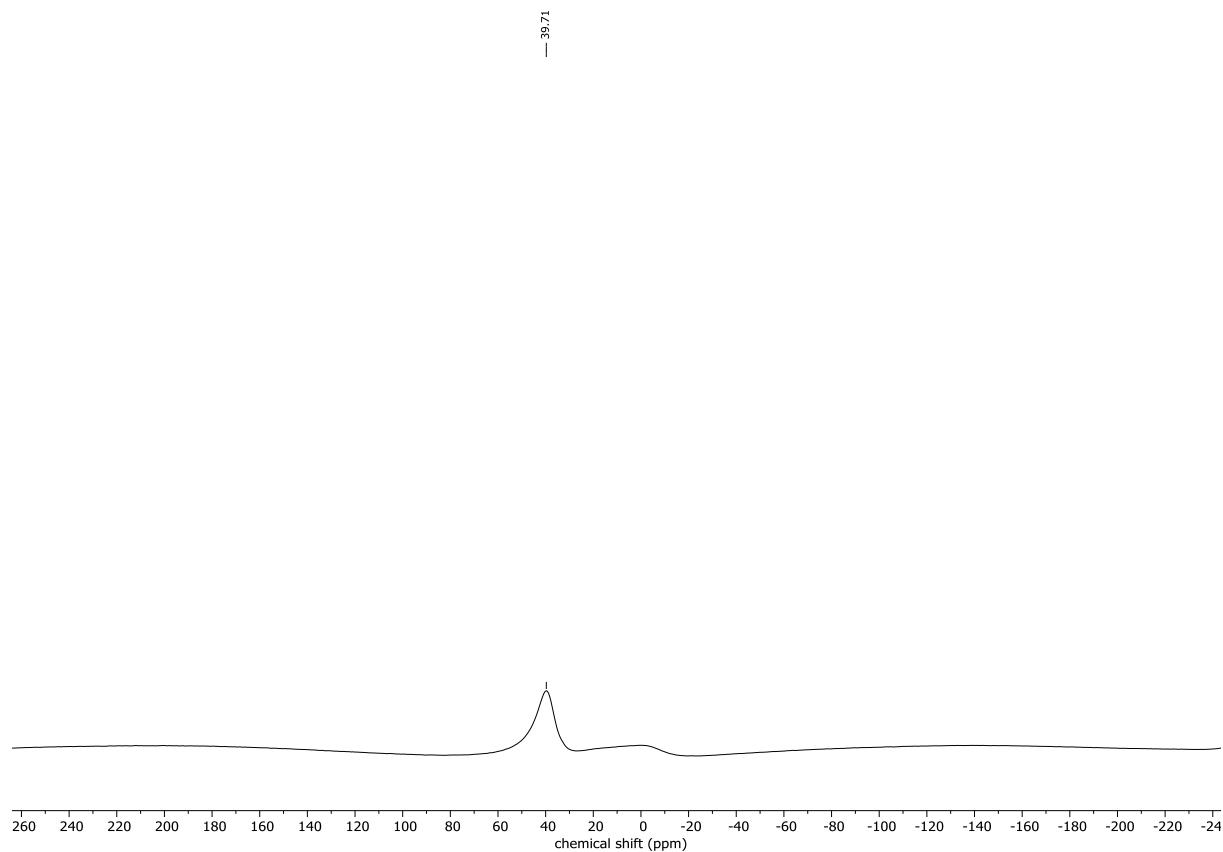



$^{13}\text{C}$  NMR (126 MHz,  $\text{CDCl}_3$ ,  $-35\text{ }^\circ\text{C}$ )

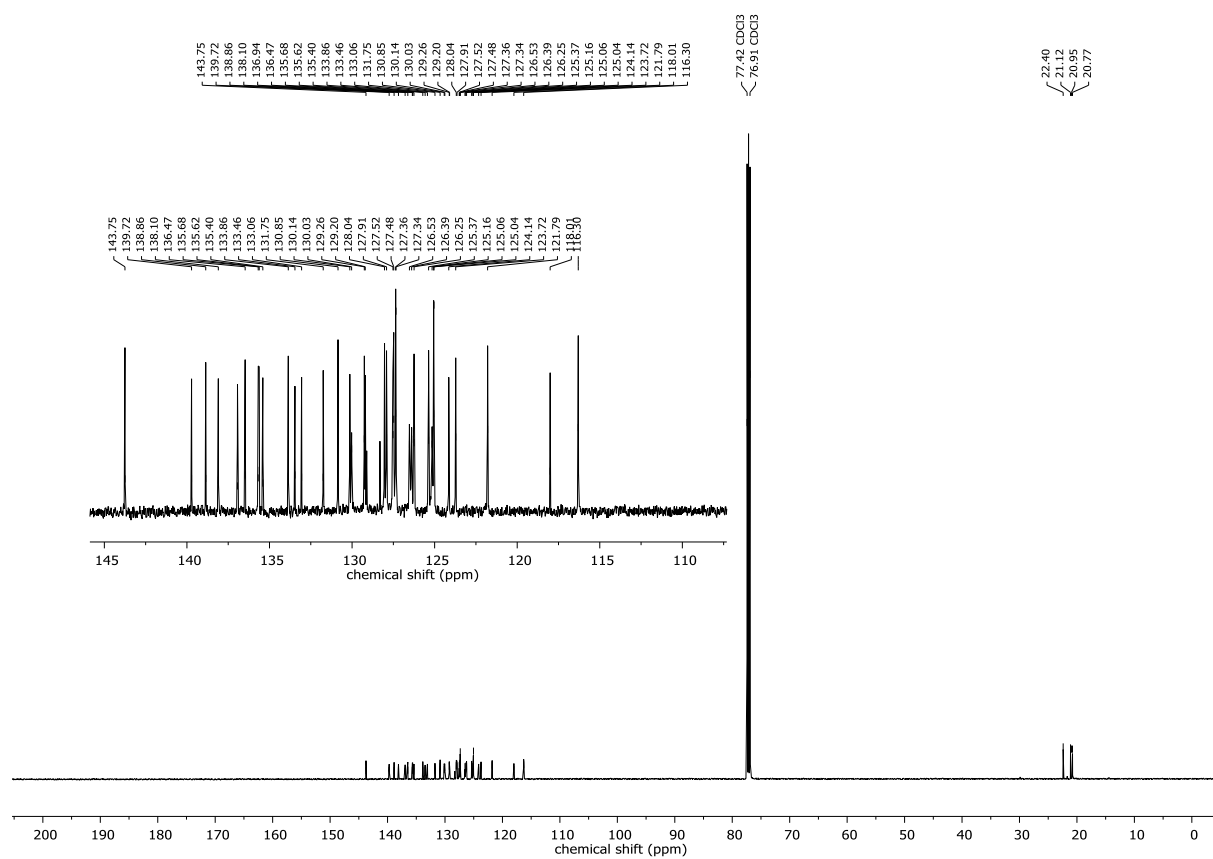

#### 4. HPLC-Chromatograms

Machine: Waters MDLC; Column: Daicel CHIRALPAK IC-U (3.0 x 100 mm), 1.6  $\mu$ m;  
Eluent: MeCN:H<sub>2</sub>O = 90:10, isocratic 0.5 mL/min, 303 K. Detection : 254 nm.

##### Racemic-1a

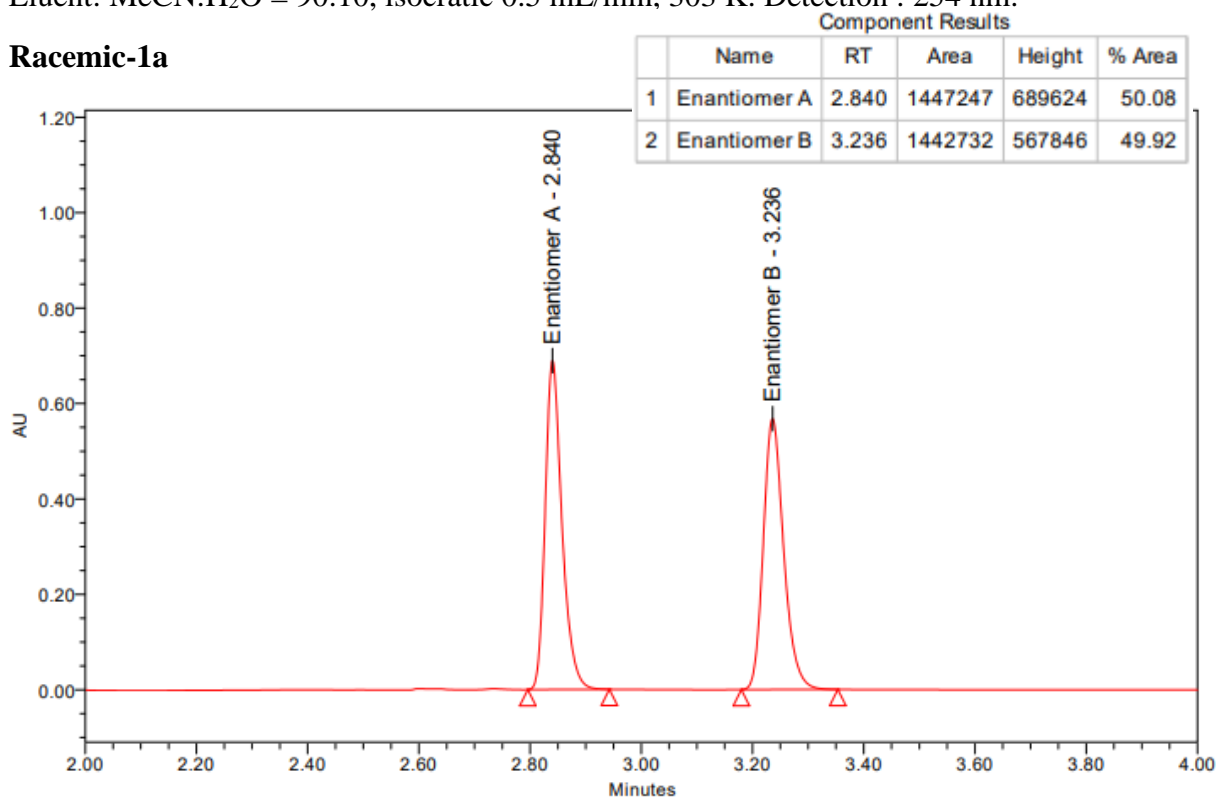

##### Enantioenriched-1a

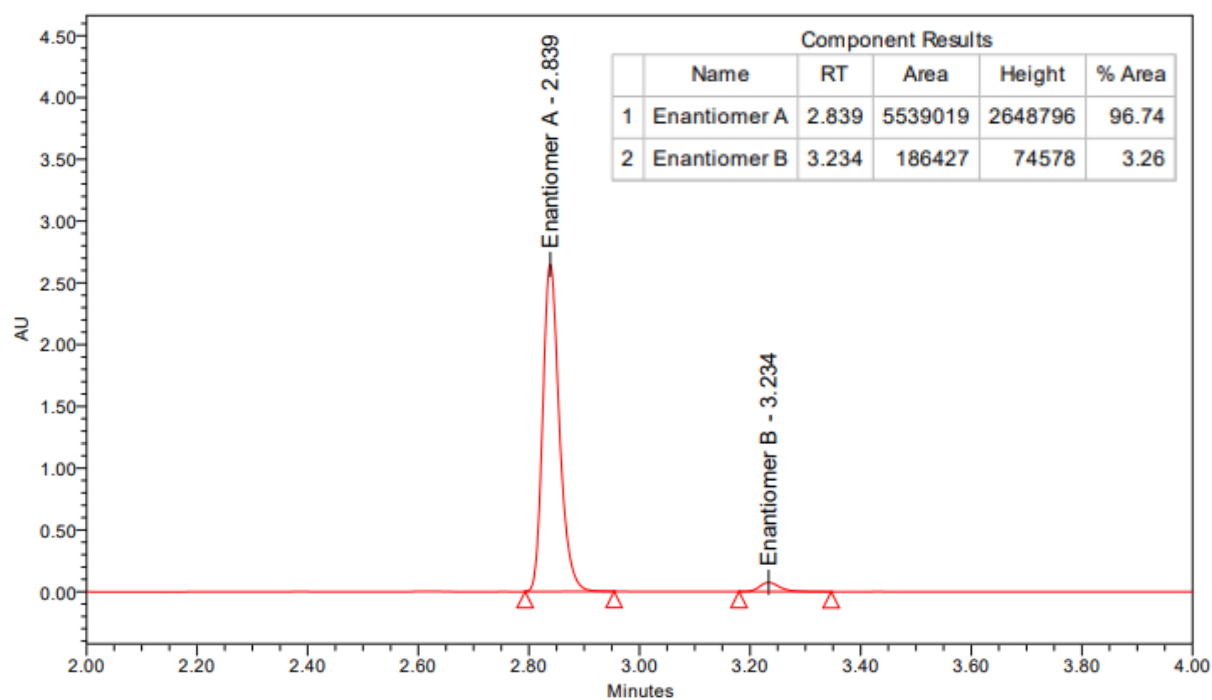

Machine: Waters MDLC; Column: Daicel CHIRALPAK IC-U (3.0 x 100 mm), 1.6  $\mu\text{m}$ ;  
Eluent: MeCN:H<sub>2</sub>O = 90:10, isocratic 0.5mL/min, 303 K. Detection : 310 nm.

### Racemic-1b

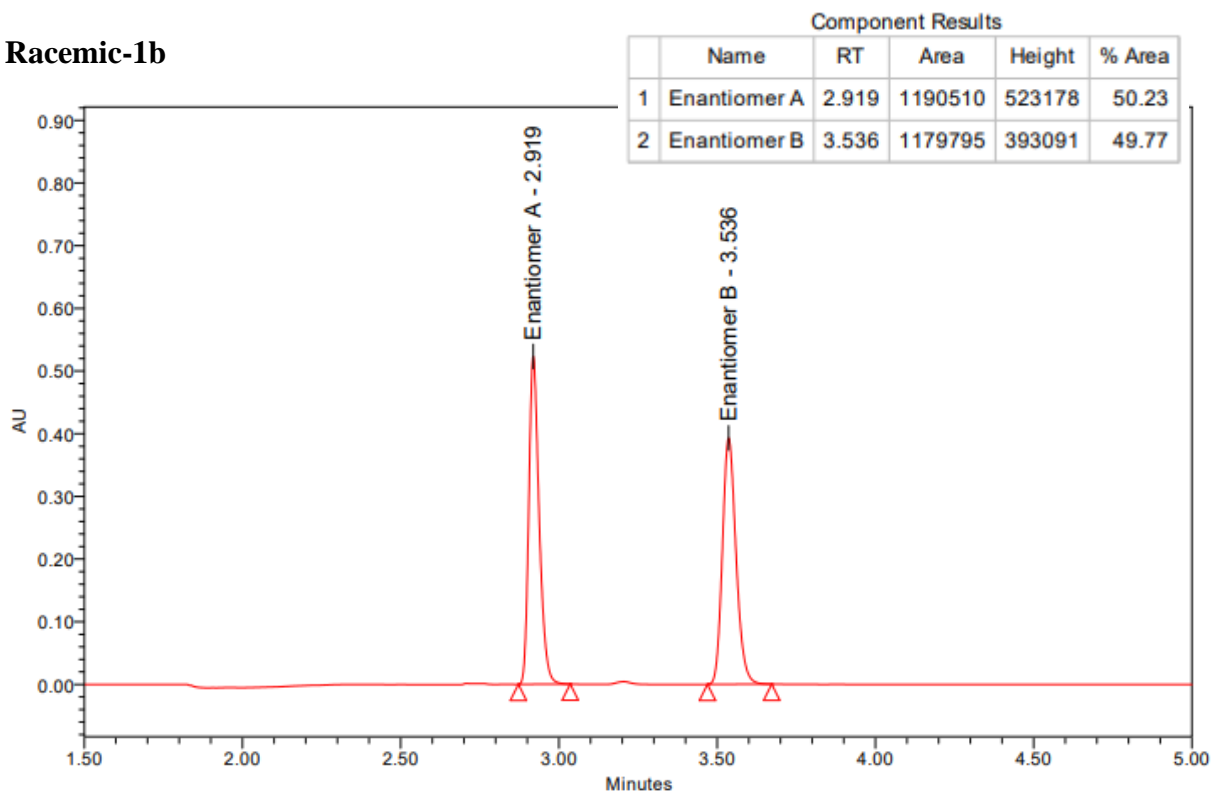

### Enantioenriched-1b

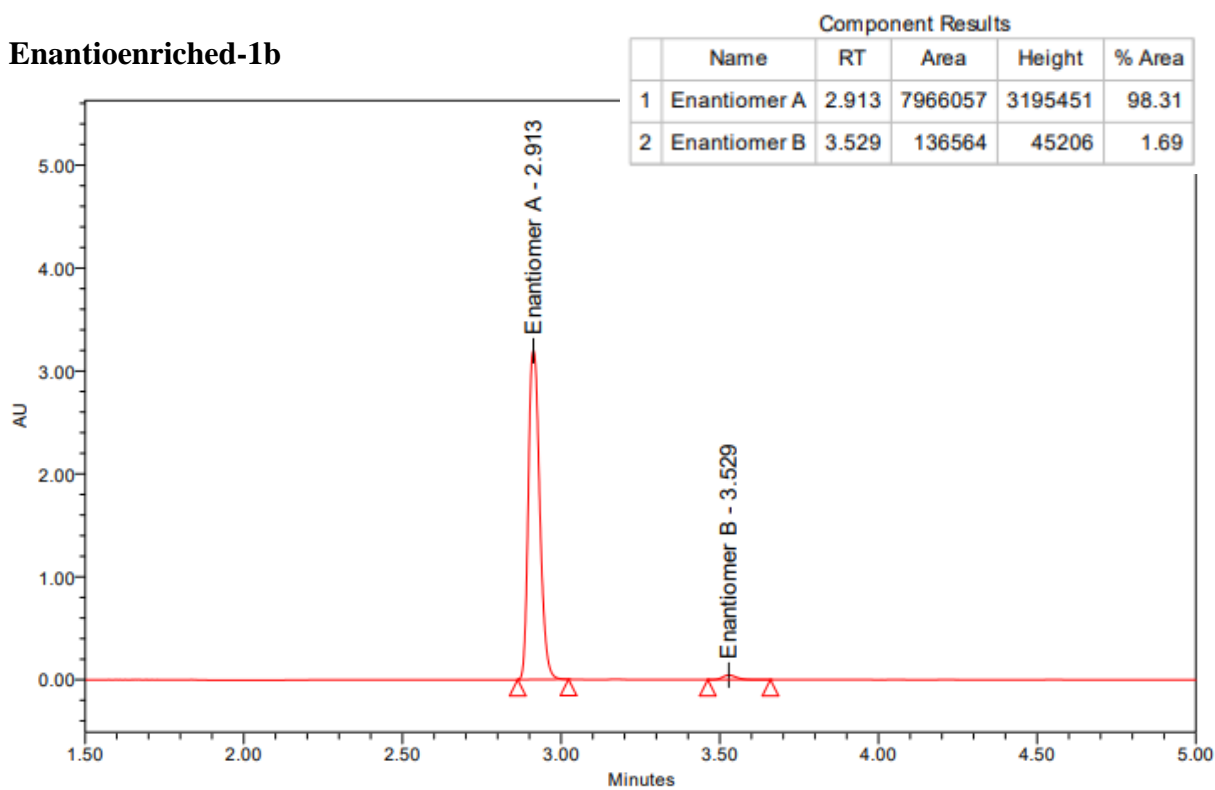

Machine: Waters MDLC; Column: Daicel CHIRALPAK IC-U (3.0 x 100 mm), 1.6  $\mu\text{m}$ ;  
Eluent: MeCN:H<sub>2</sub>O = 95:5, isocratic 0.5 mL/min, 303 K. Detection : 254 nm.

### Racemic-1c

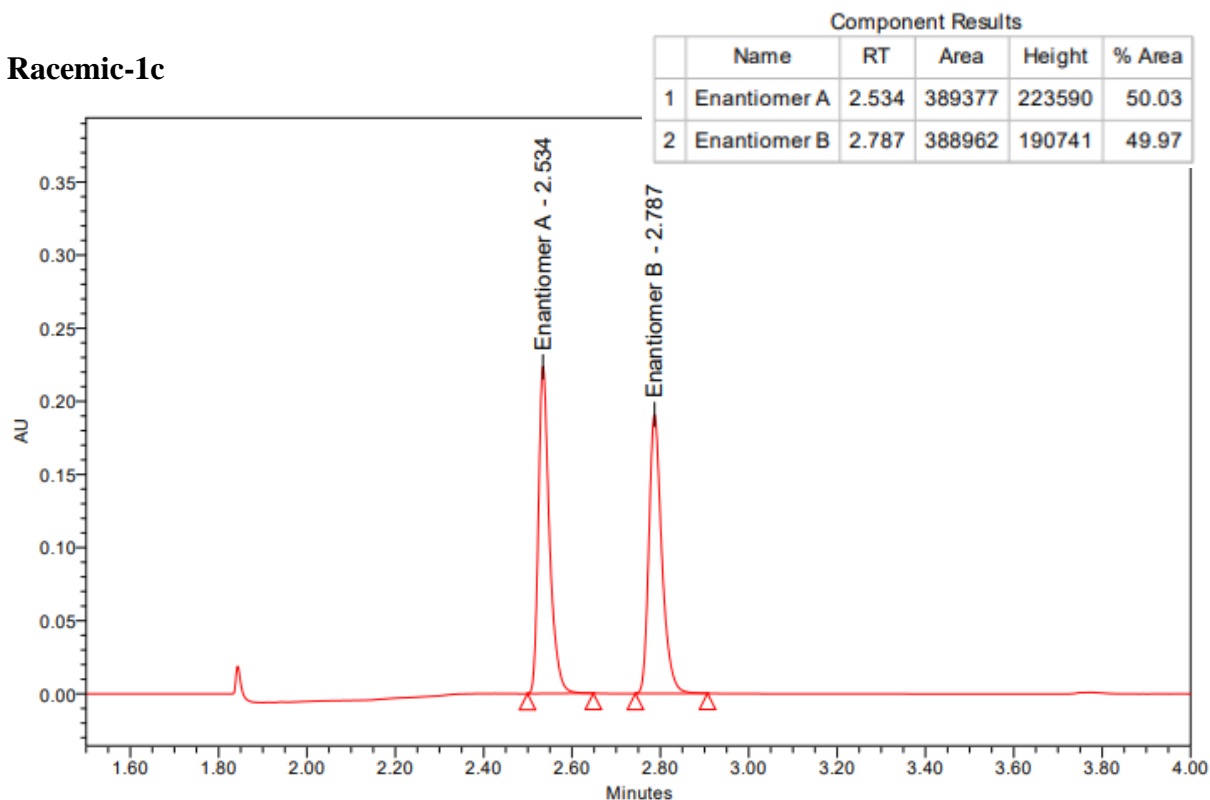

### Enantioenriched-1c

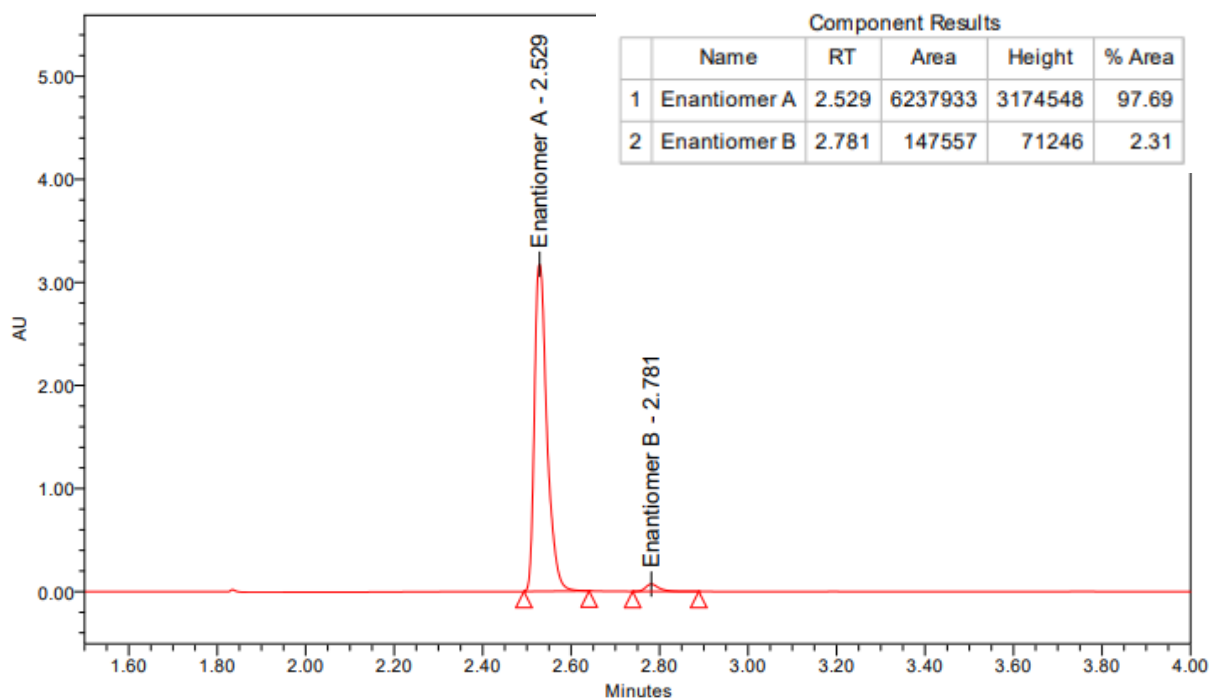

Machine: Waters MDLC; Column: Daicel CHIRALPAK IC-U (3.0 x 100 mm), 1.6  $\mu$ m;  
Eluent: MeCN:H<sub>2</sub>O = 90:10, isocratic 0.5 mL/min, 303 K. Detection : 254 nm.

### Racemic-1d

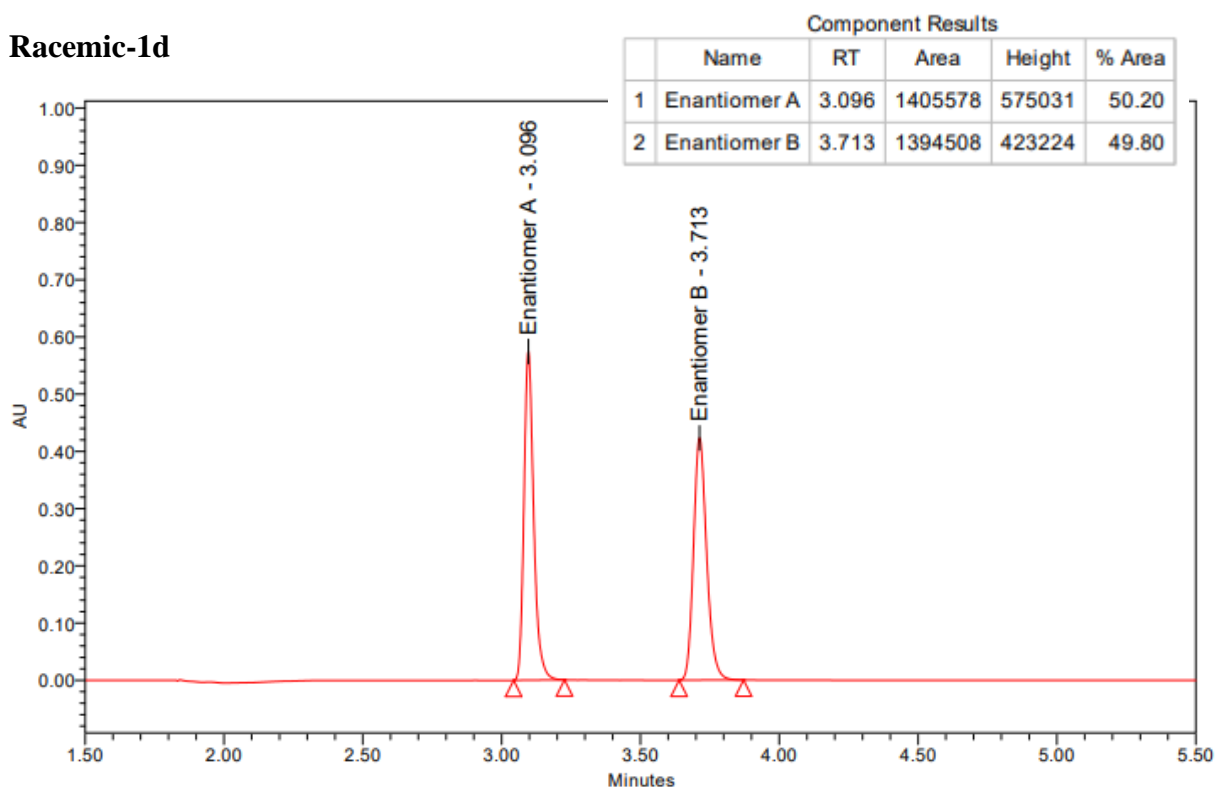

### Enantioenriched-1d

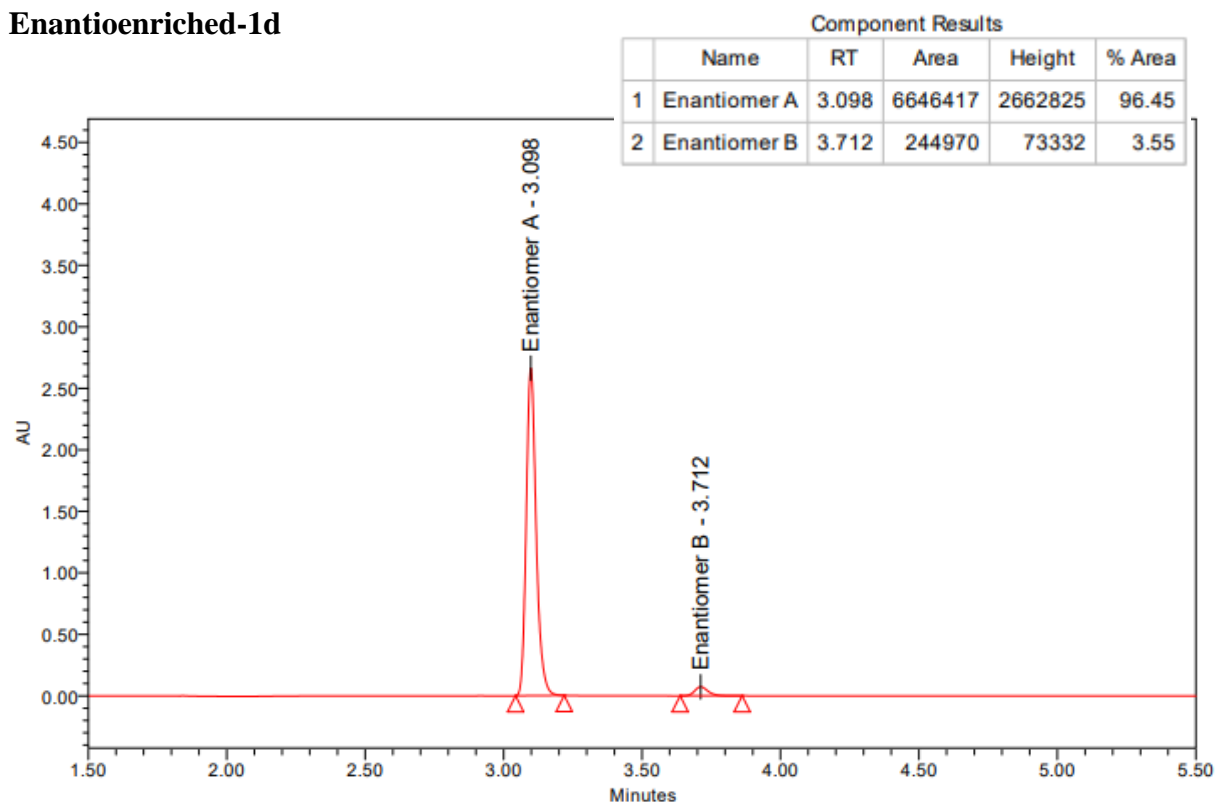

Machine: Waters MDLC; Column: Daicel CHIRALPAK IC-U (3.0 x 100 mm), 1.6  $\mu\text{m}$ ;  
Eluent: MeCN:H<sub>2</sub>O = 90:10, isocratic 0.5 mL/min, 303 K. Detection : 254 nm.

### Racemic-1e

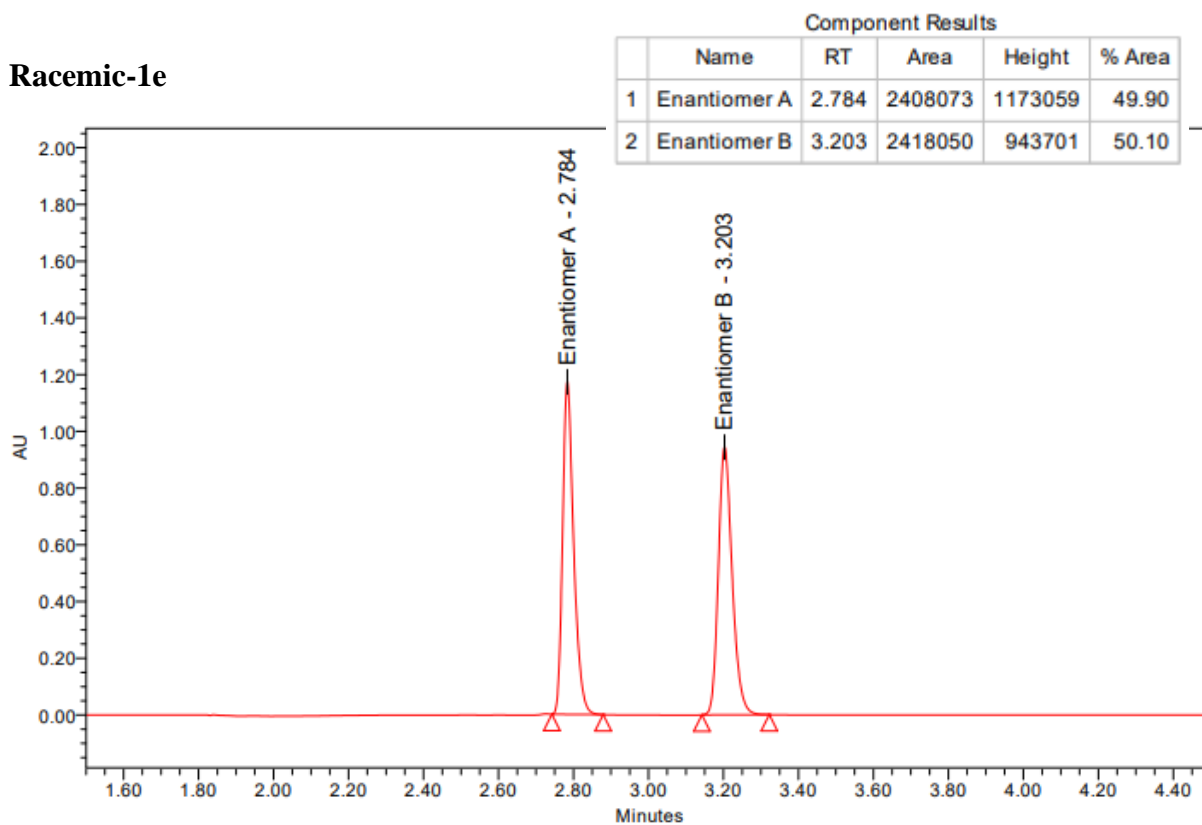

### Enantioenriched-1e

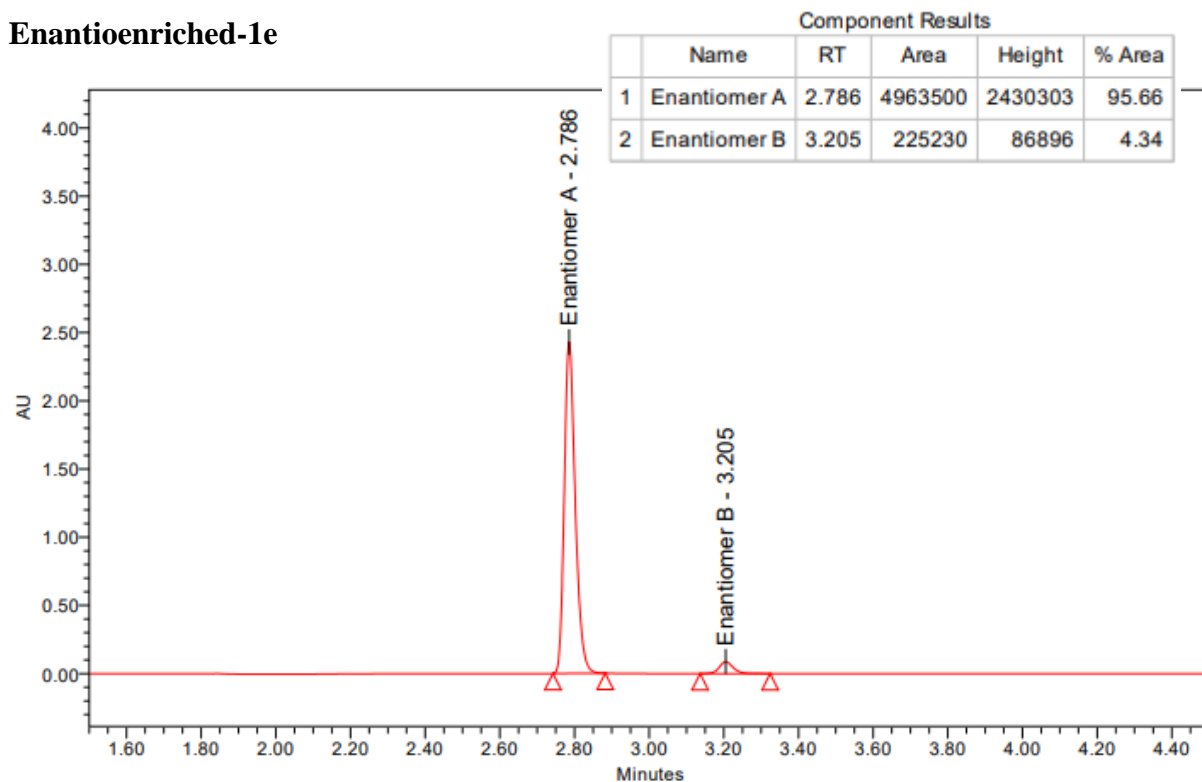

Machine: Waters MDLC; Column: Daicel CHIRALPAK IC-U (3.0 x 100 mm), 1.6  $\mu$ m;  
Eluent: MeCN:H<sub>2</sub>O = 90:10, isocratic 0.5 mL/min, 303 K. Detection : 254 nm.

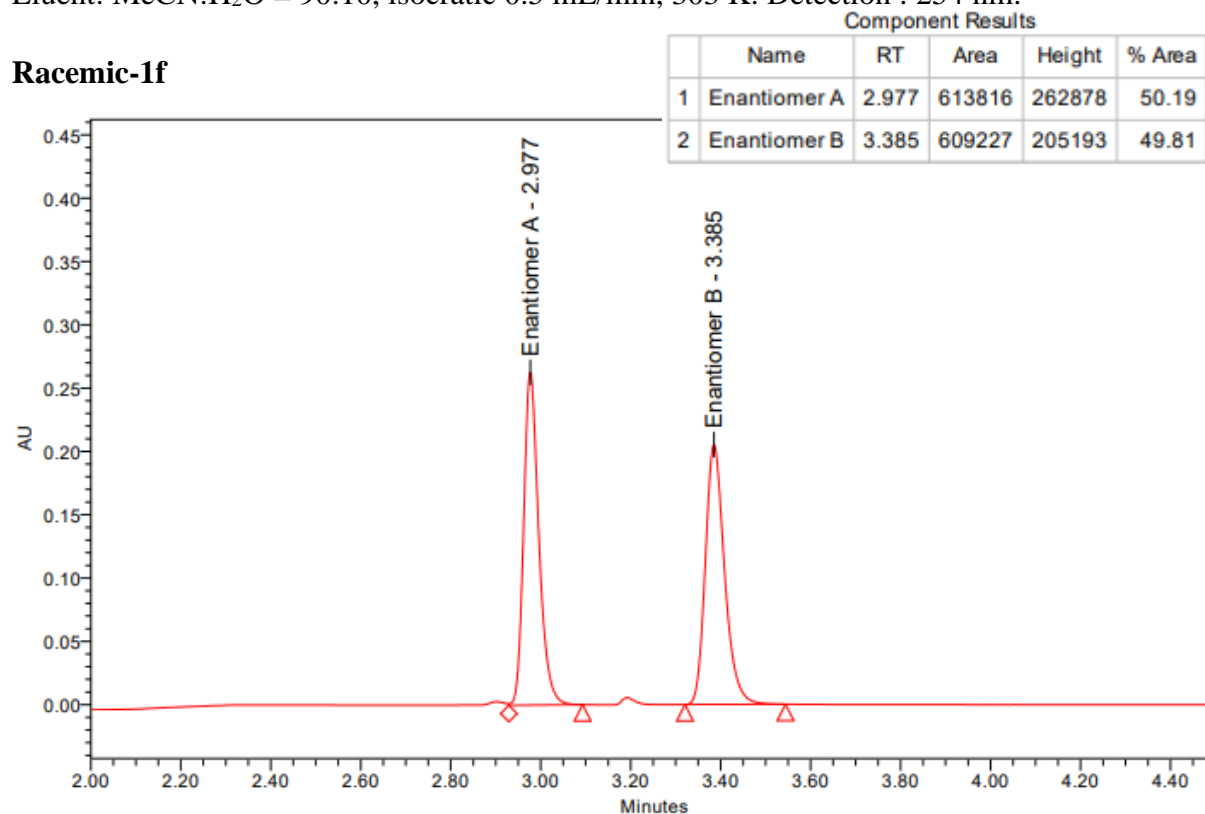

**Enantioenriched-1f**

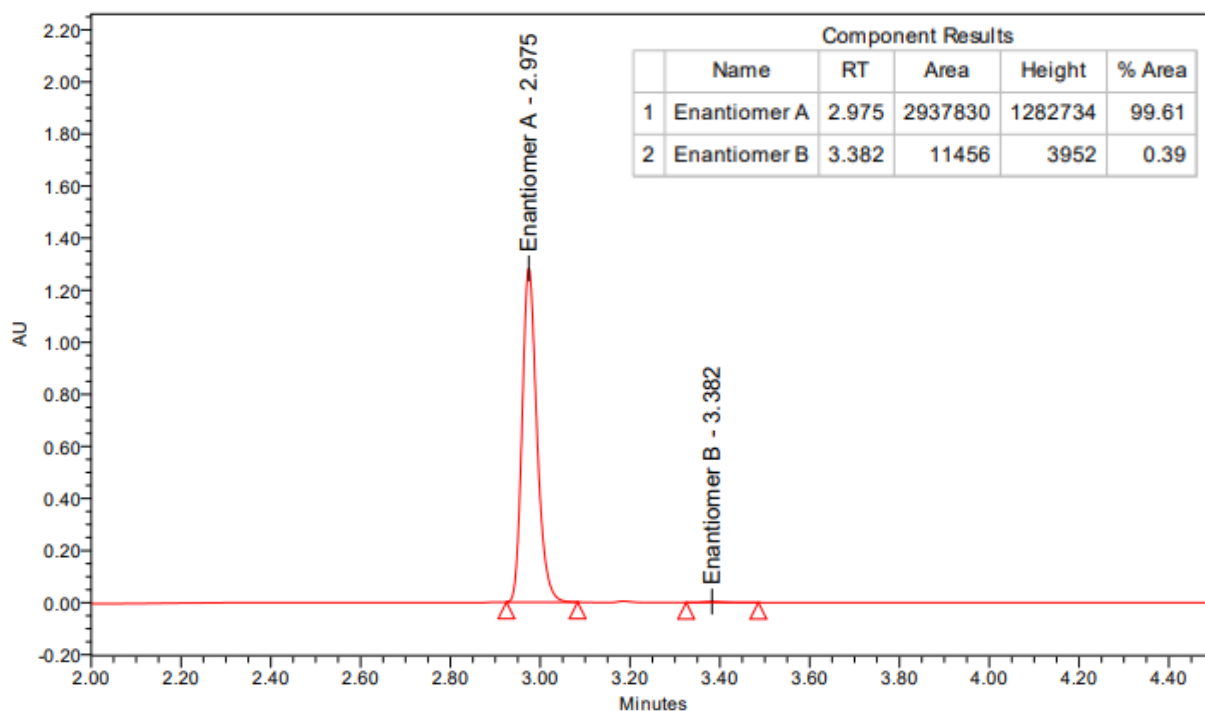

Machine: Waters MDLC; Column: Daicel CHIRALPAK IC-U (3.0 x 100 mm), 1.6  $\mu\text{m}$ ;  
Eluent: MeCN:H<sub>2</sub>O = 90:10, isocratic 0.5 mL/min, 303 K. Detection : 254 nm.

### Racemic-1g

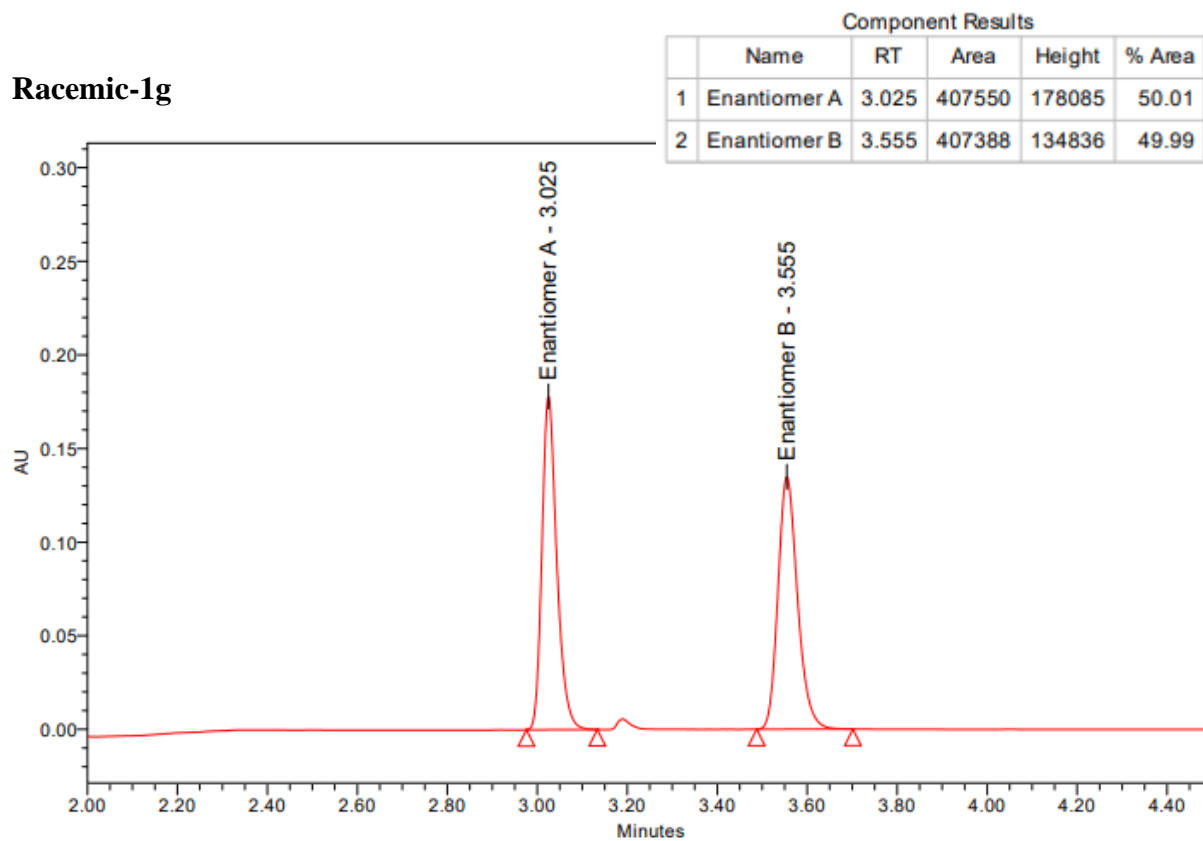

### Enantioenriched-1g

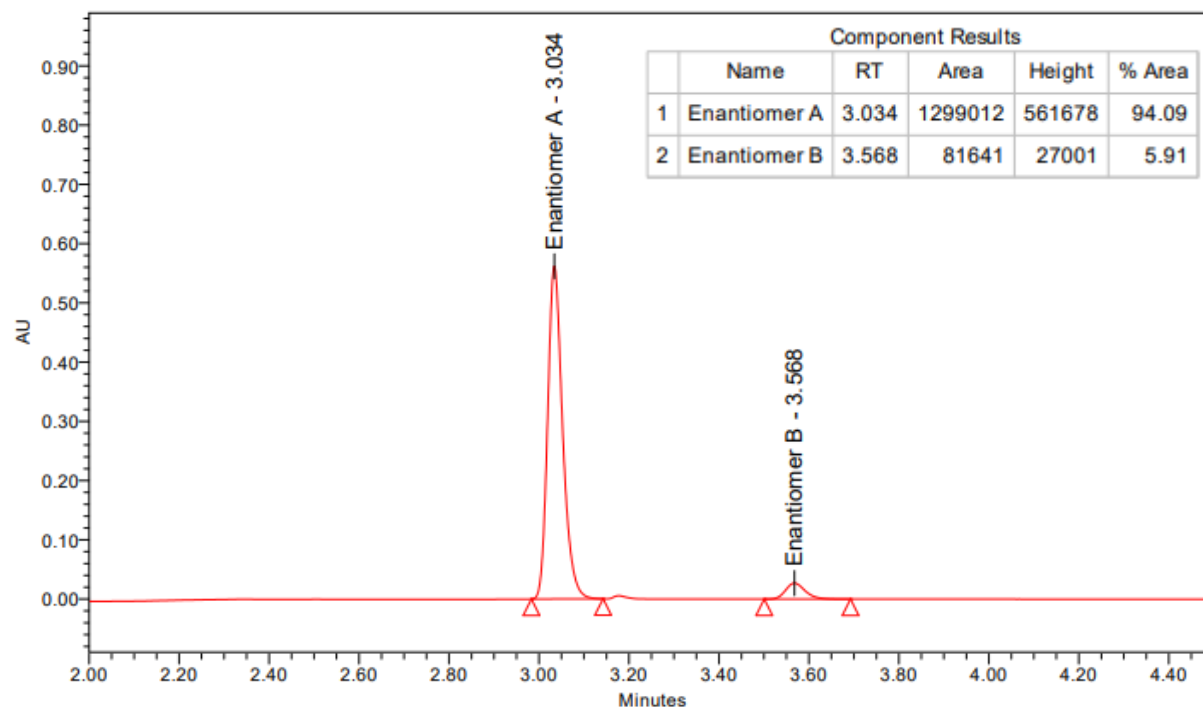

Machine: Waters MDLC; Column: Daicel CHIRALPAK IC-U (3.0 x 100 mm), 1.6  $\mu\text{m}$ ;  
Eluent: MeCN:H<sub>2</sub>O = 90:10, isocratic 0.5 mL/min, 303 K. Detection : 254 nm.

### Racemic-1h

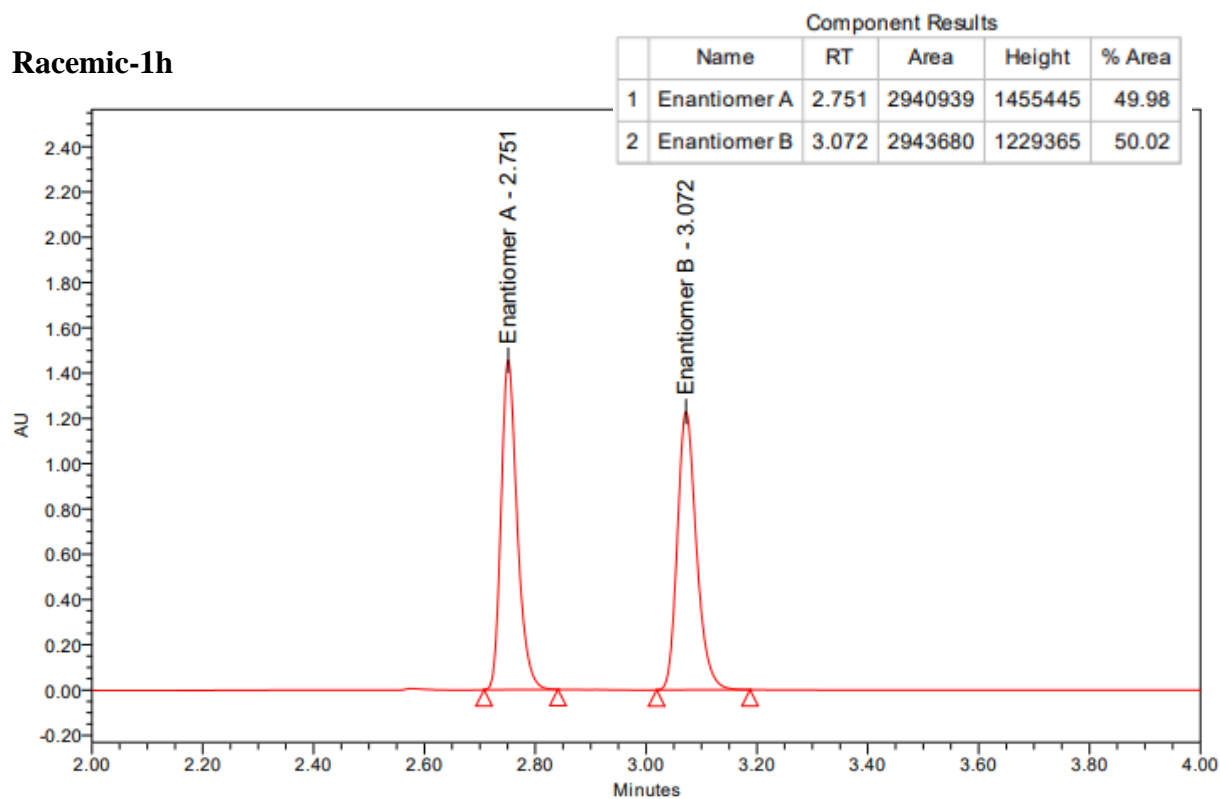

### Enantioenriched-1h

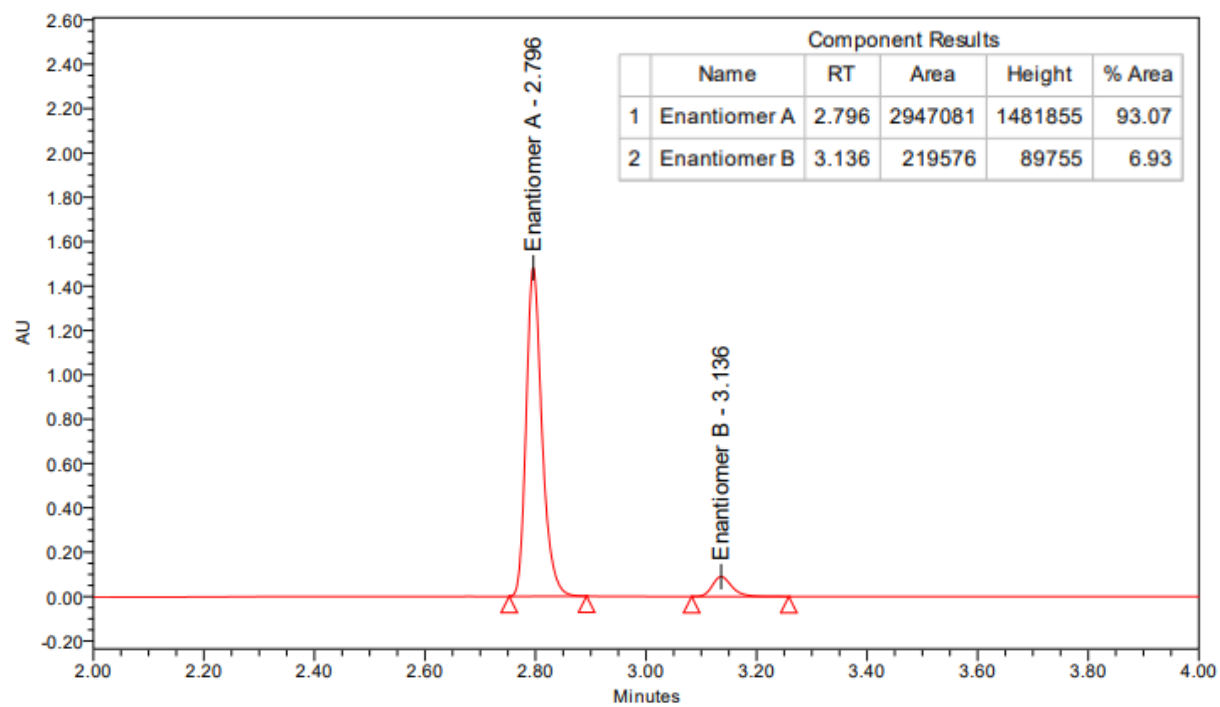

Machine: Waters MDLC; Column: Daicel CHIRALPAK IG-U (3.0 x 100 mm), 1.6  $\mu$ m;  
Eluent: MeCN:H<sub>2</sub>O = 80:20, isocratic 0.5 mL/min, 303 K. Detection : 254 nm.

### Racemic-1i

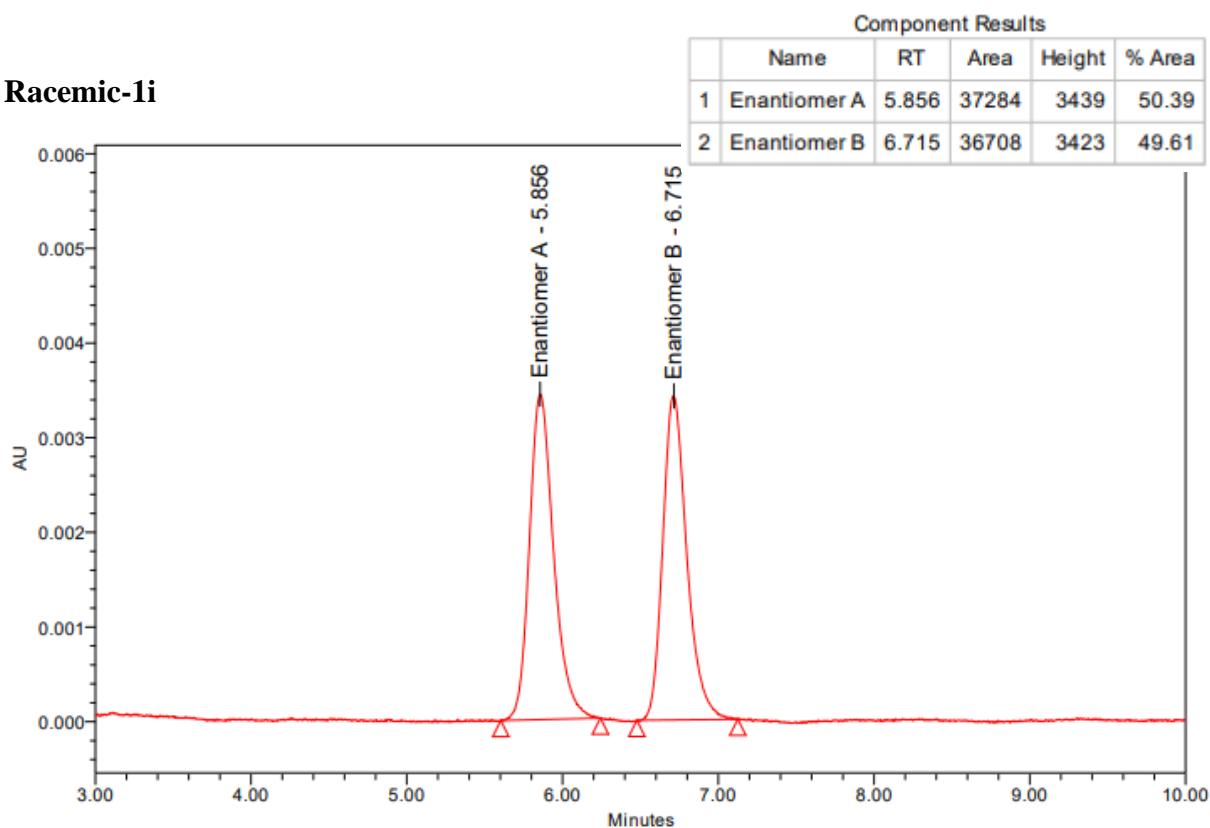

### Enantioenriched-1i

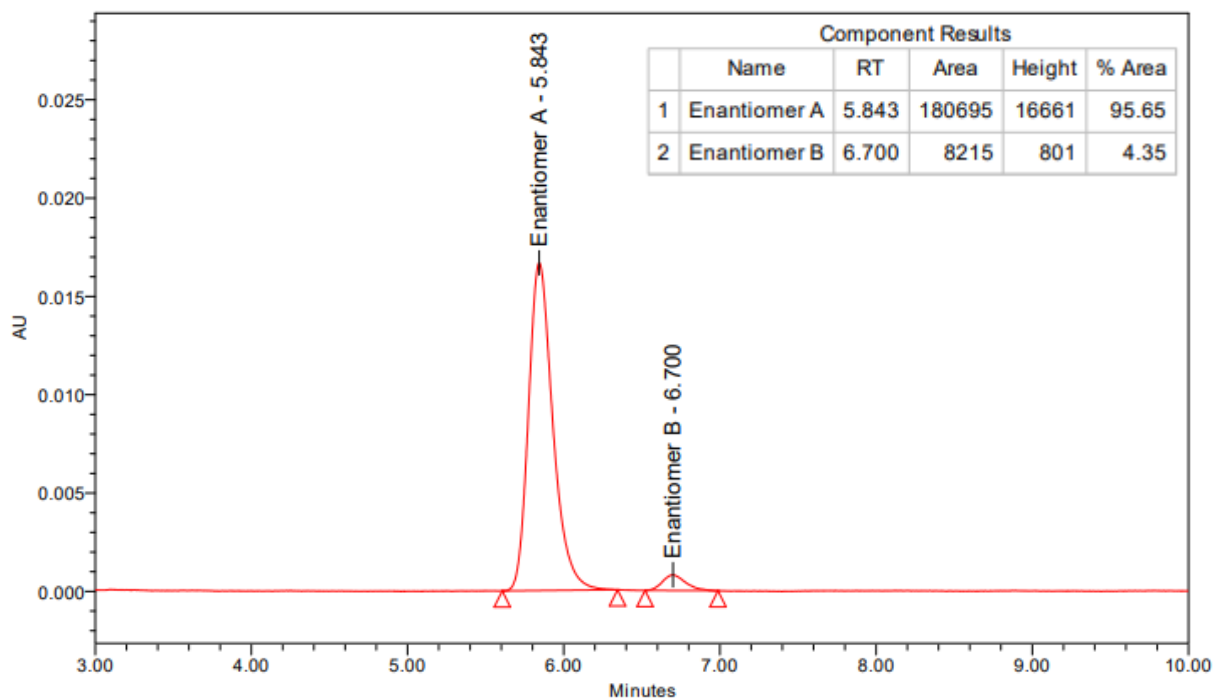

Machine: Waters MDLC; Column: Daicel CHIRALPAK IC-U (3.0 x 100 mm), 1.6  $\mu\text{m}$ ;  
Eluent: MeCN:H<sub>2</sub>O = 80:20, isocratic 0.5 mL/min, 303 K. Detection : 254 nm.

Component Results

|   | Name         | RT    | Area   | Height | % Area |
|---|--------------|-------|--------|--------|--------|
| 1 | Enantiomer A | 4.427 | 205464 | 51415  | 50.11  |
| 2 | Enantiomer B | 5.022 | 204565 | 43008  | 49.89  |

### Racemic-1j

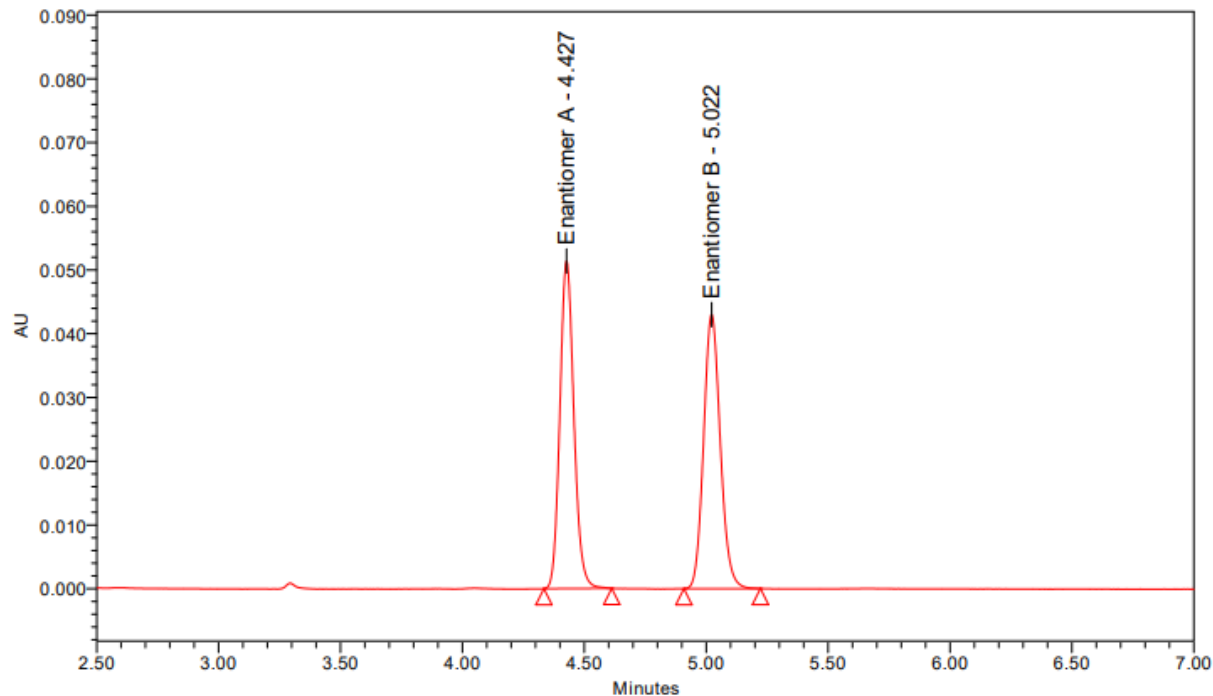

### Enantioenriched-1j

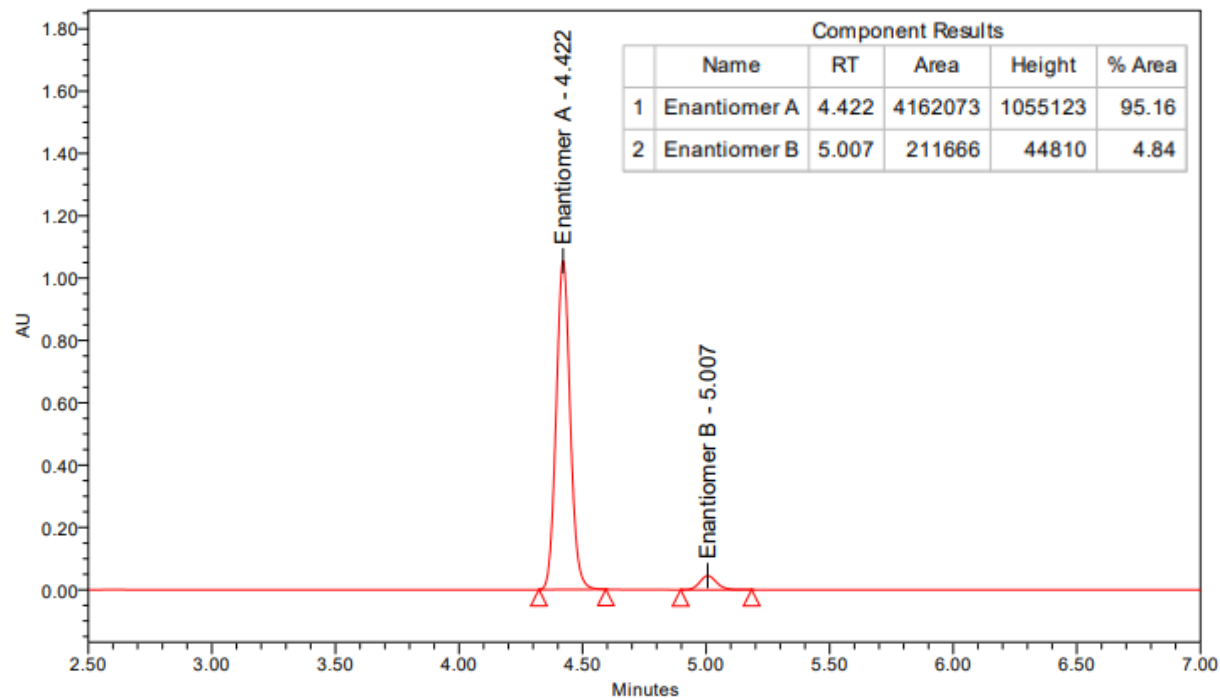

Machine: Waters MDLC; Column: Daicel CHIRALPAK IC-U (3.0 x 100 mm), 1.6  $\mu$ m;  
Eluent: MeCN:H<sub>2</sub>O = 90:10, isocratic 0.5 mL/min, 303 K. Detection : 254 nm.

### Racemic-1b(NMe)

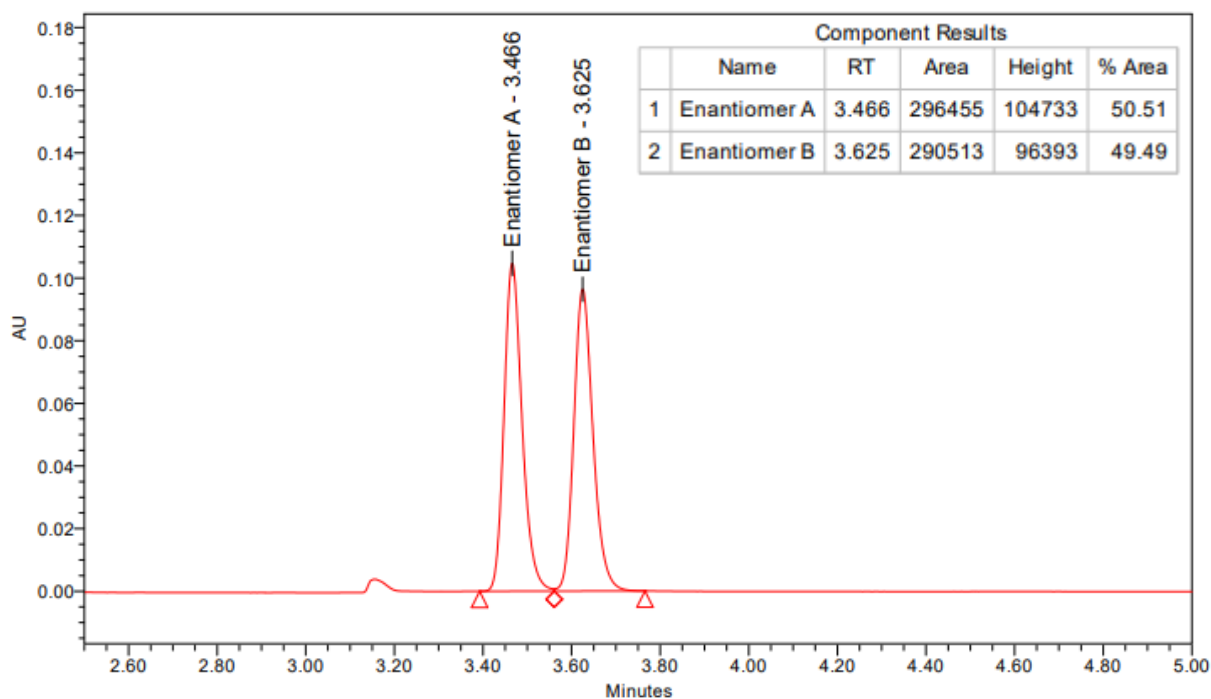

### Enantioenriched-1b(NMe)

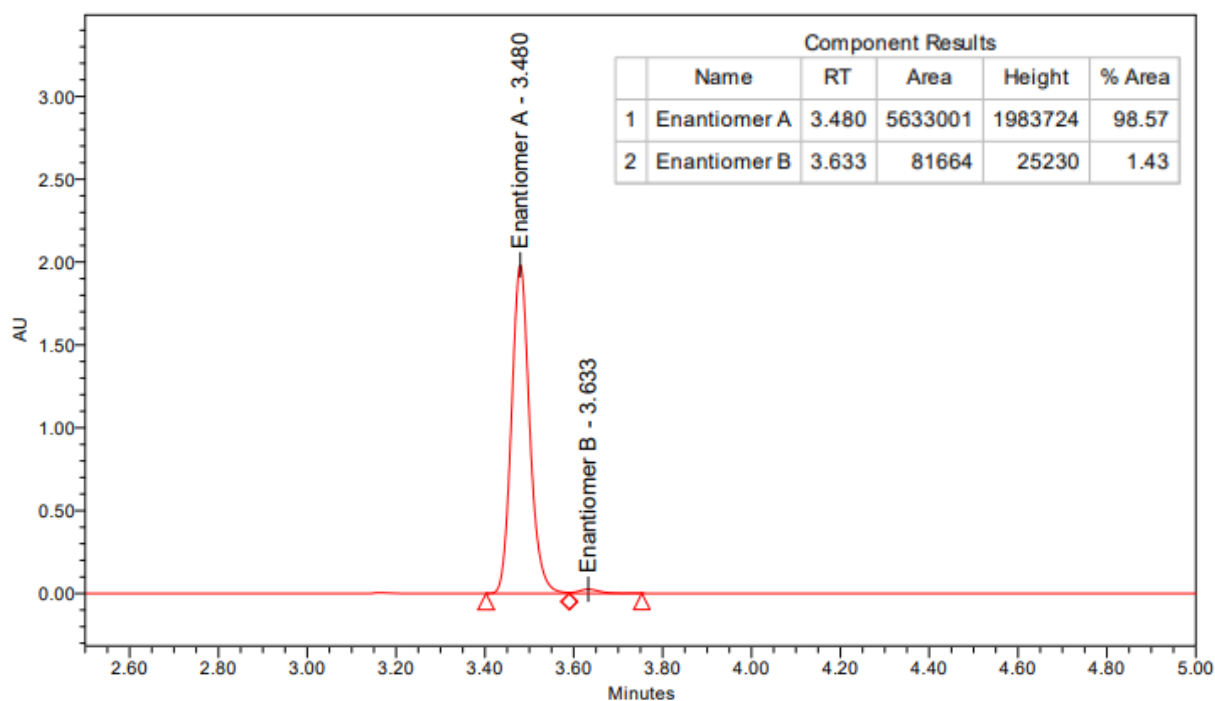

Machine: Waters MDLC, Column: Daicel CHIRALPAK IG-U (3.0 x 100 mm), 1.6  $\mu$ m;  
Eluent: MeCN:H<sub>2</sub>O = 80:20, isocratic 0.5 mL/min, 303 K. Detection : 254 nm.

### Racemic-2b

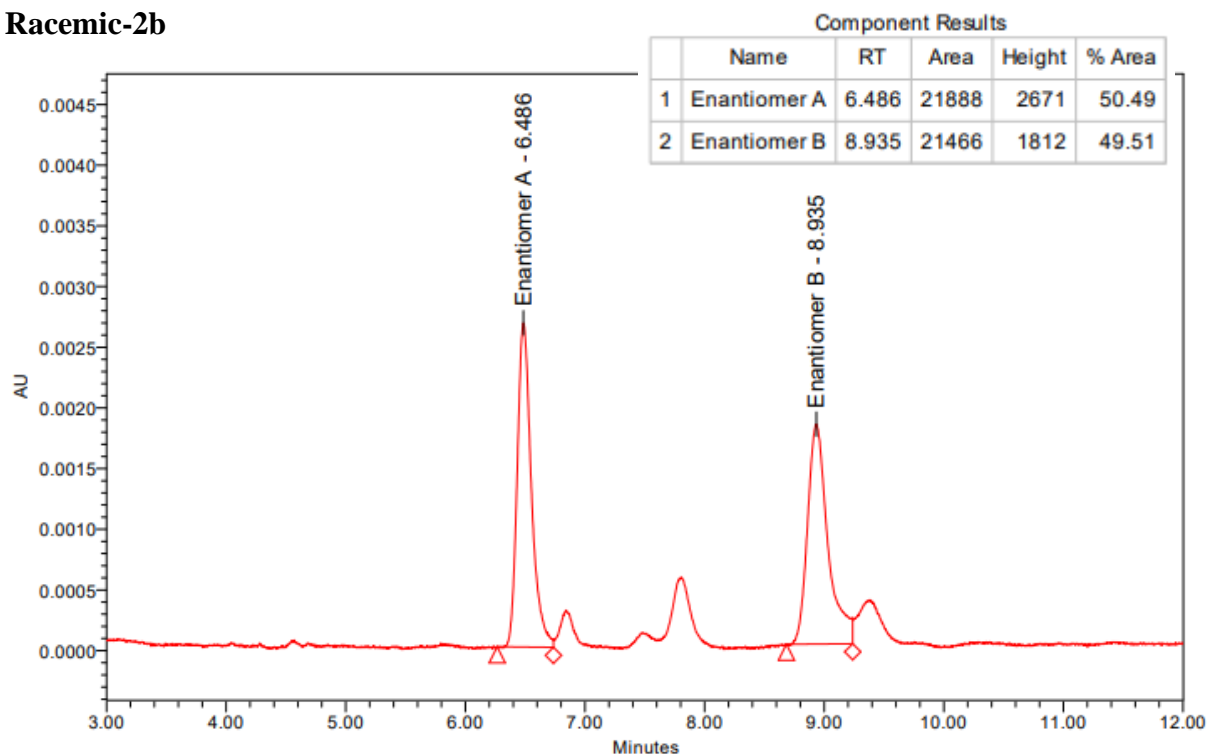

### Enantioenriched-2b

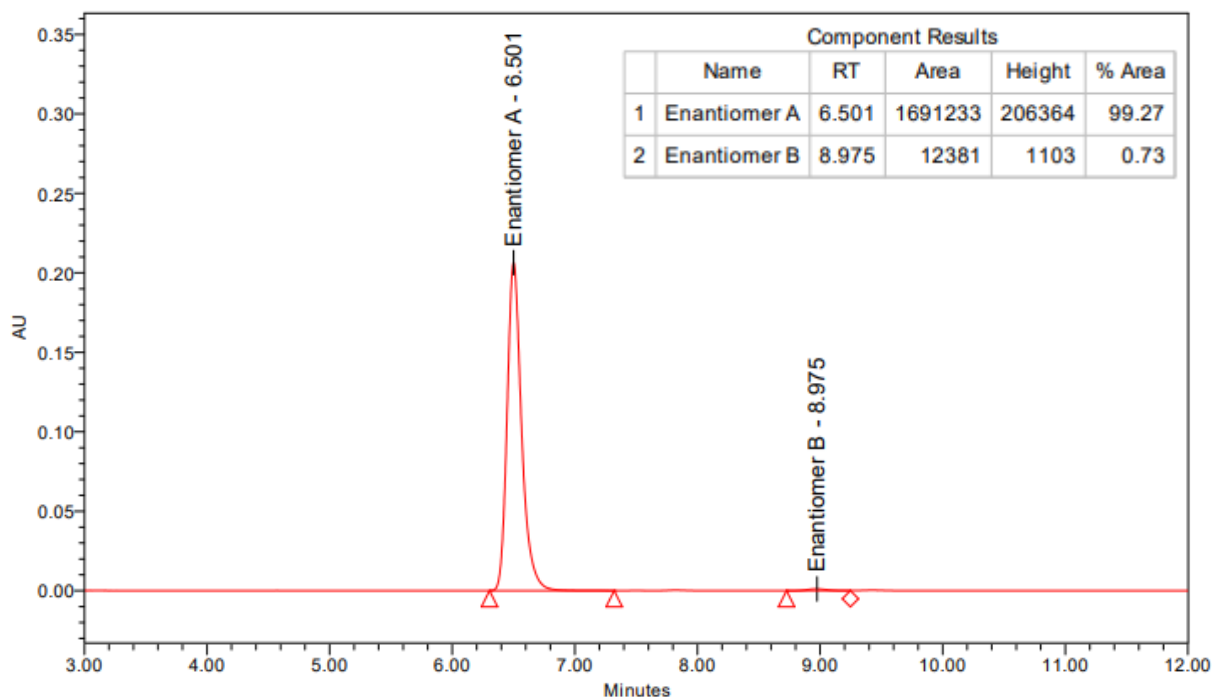

Machine: Waters MDLC; Column: Daicel CHIRALPAK IG-U (3.0 x 100 mm), 1.6  $\mu\text{m}$ ;  
Eluent: MeCN:H<sub>2</sub>O = 80:20, isocratic, 0.5 mL/min, 303 K. Detection : 254 nm.

### Racemic-2c

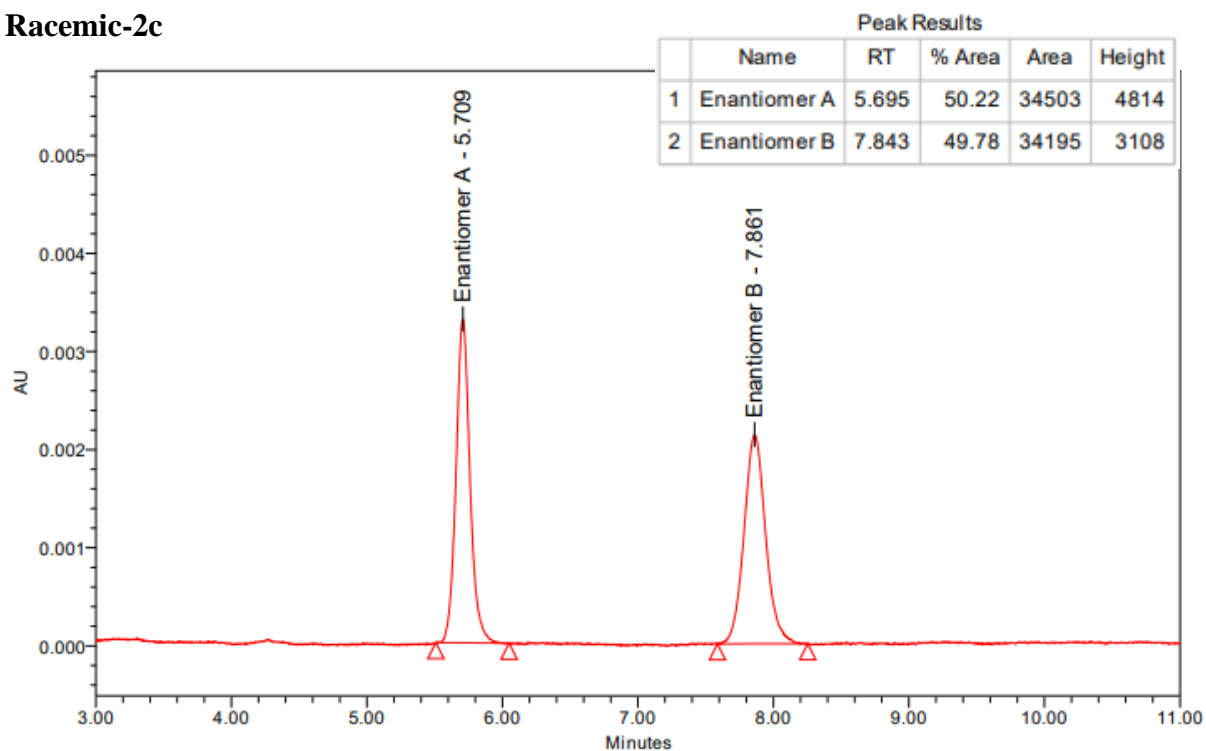

### Enantioenriched-2c

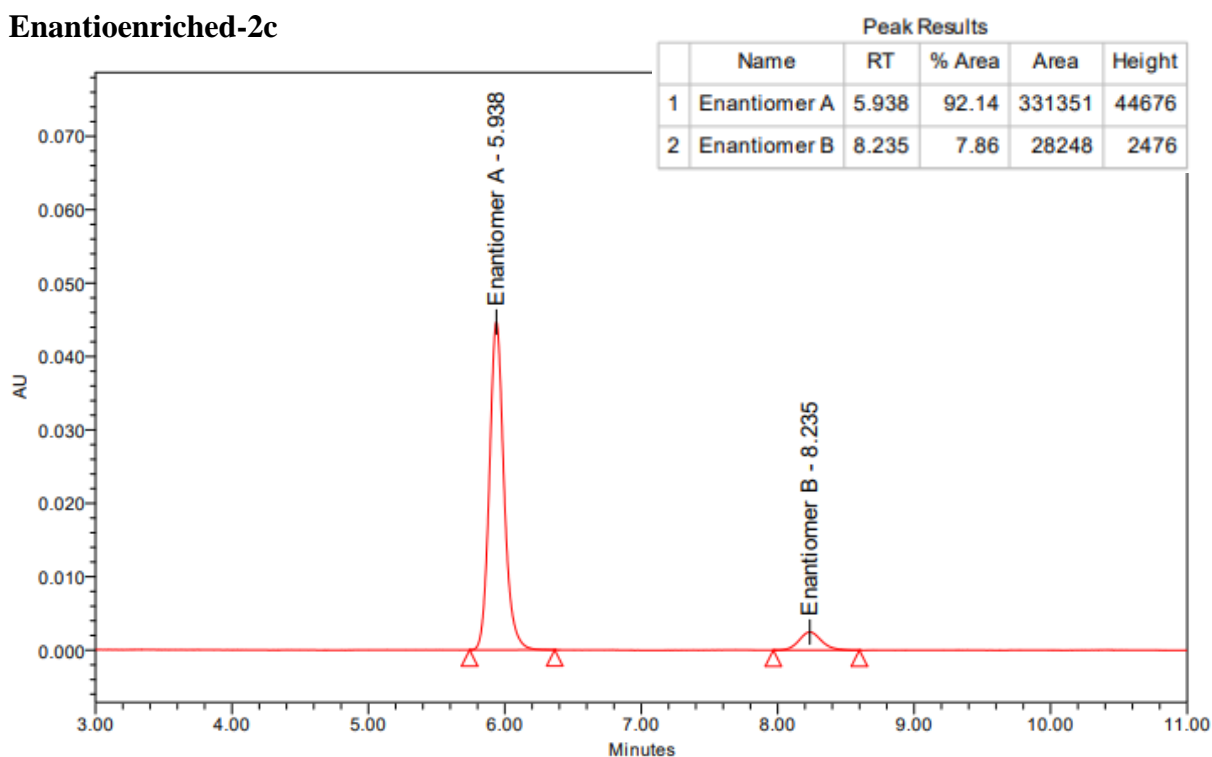

Machine: Waters MDLC; Column: Daicel CHIRALPAK IG-U (3.0 x 100 mm), 1.6  $\mu\text{m}$ ;  
Eluent: MeCN:H<sub>2</sub>O = 85:15, isocratic 0.5 mL/min, 303 K. Detection : 254 nm.

### Racemic-2e

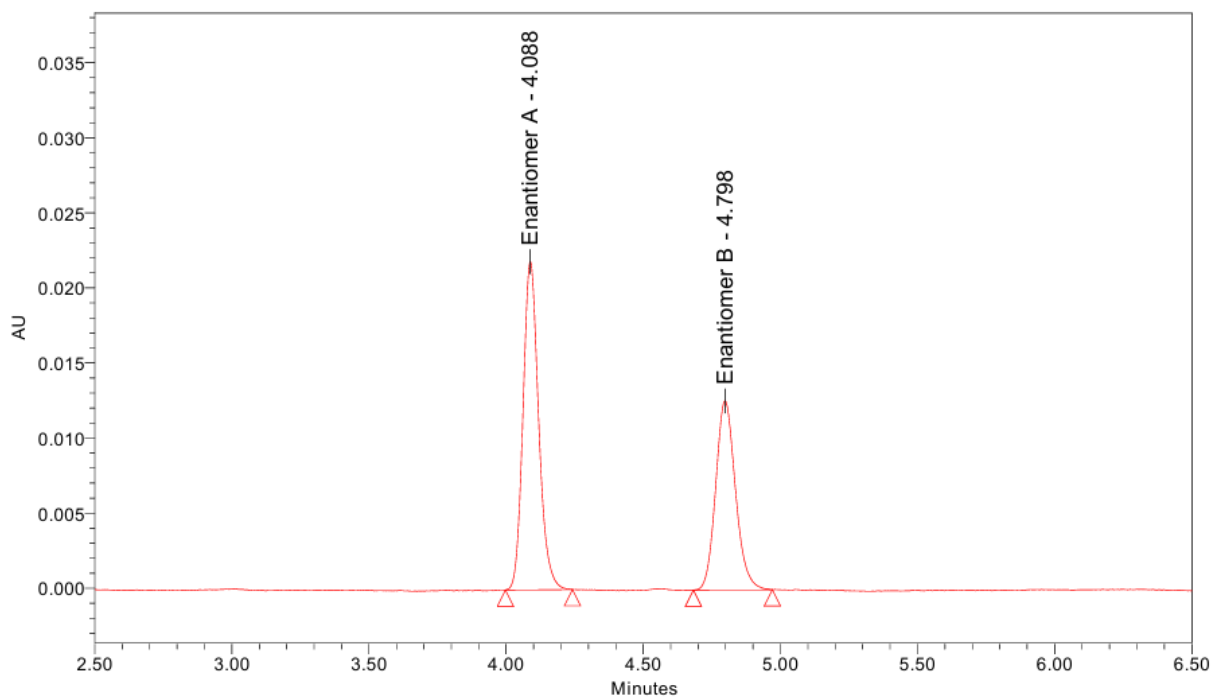

### Enantioenriched-2e

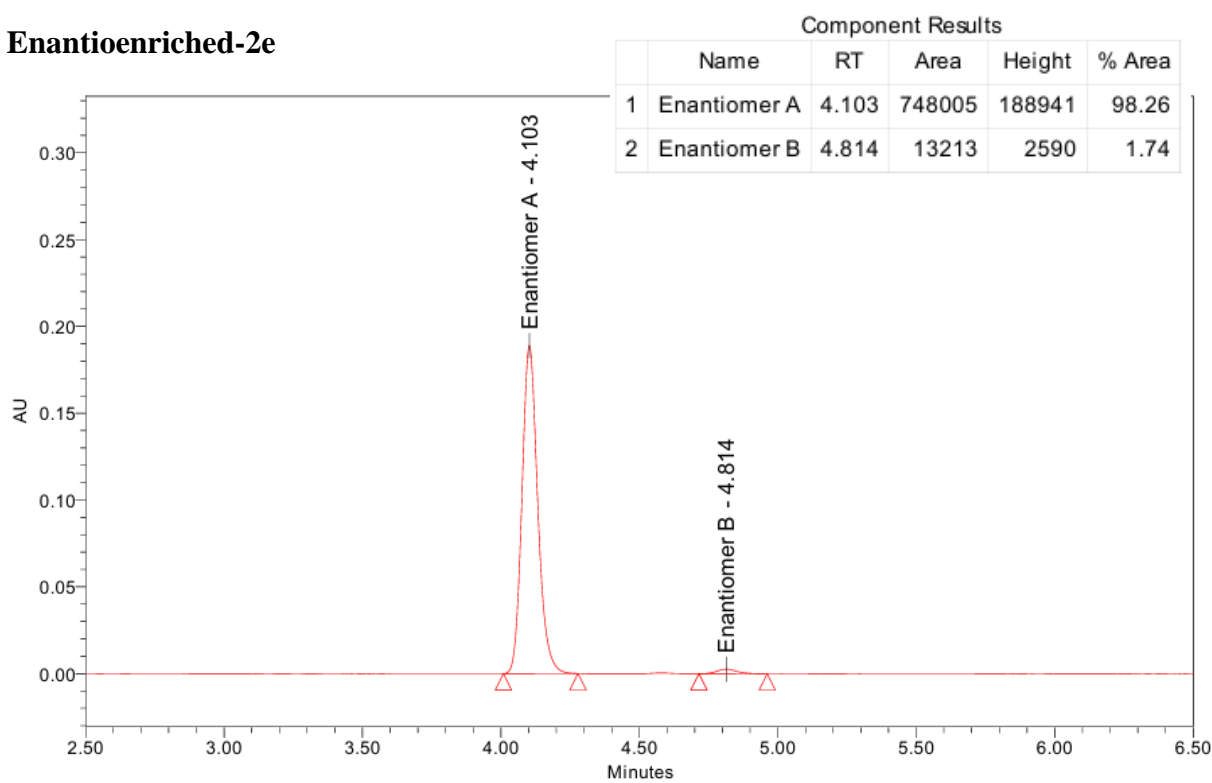

Machine: Waters MDLC; Column: Daicel CHIRALPAK IC-U (3.0 x 100 mm), 1.6  $\mu\text{m}$ ;  
Eluent: MeCN:H<sub>2</sub>O = 80:20, isocratic 0.5 mL/min, 303 K. Detection : 320 nm.

### Racemic-2h

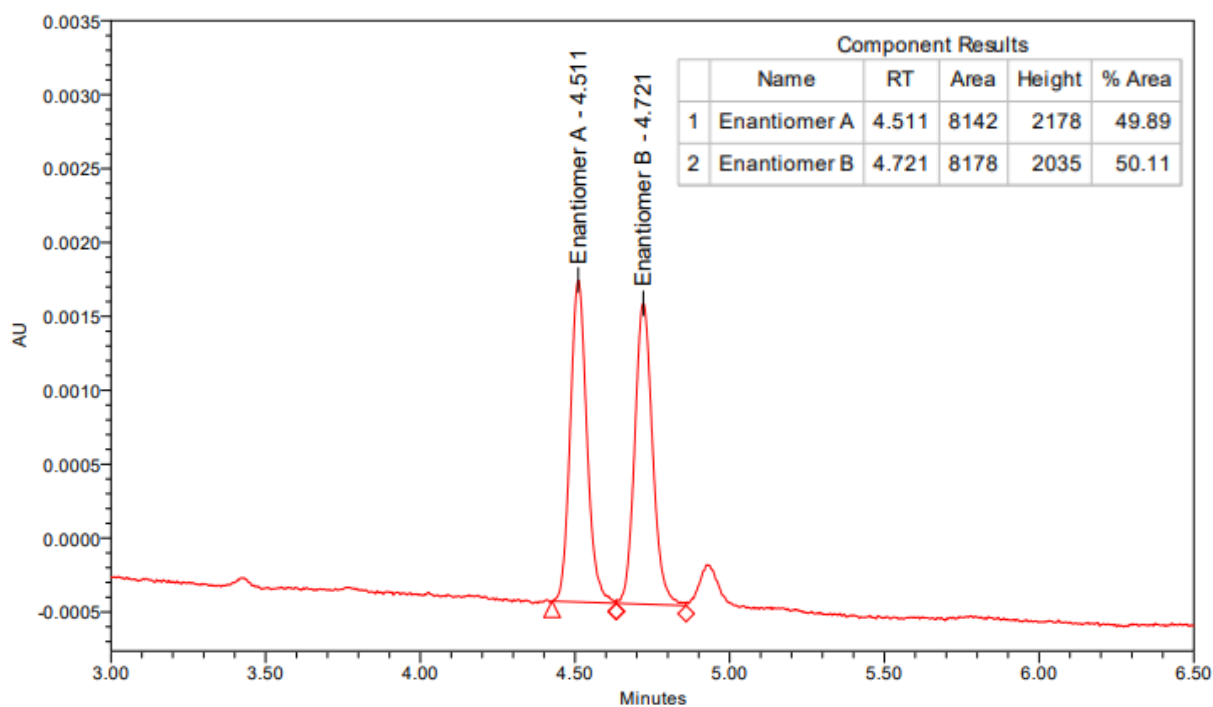

### Enantioenriched-2h

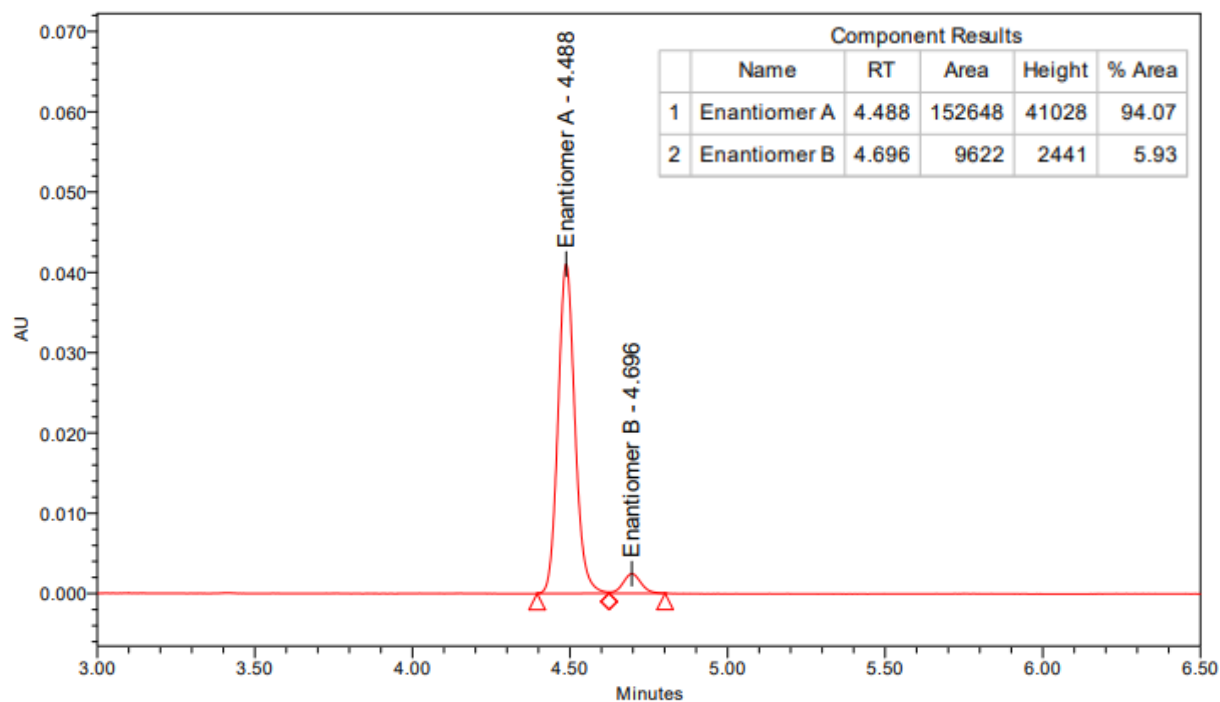

Machine: Waters MDLC; Column: Daicel CHIRALPAK IG-U (3.0 x 100 mm), 1.6  $\mu\text{m}$ ;  
Eluent: MeCN:H<sub>2</sub>O = 90:10, isocratic 0.5 mL/min, 303 K. Detection : 254 nm.

### Racemic-12b

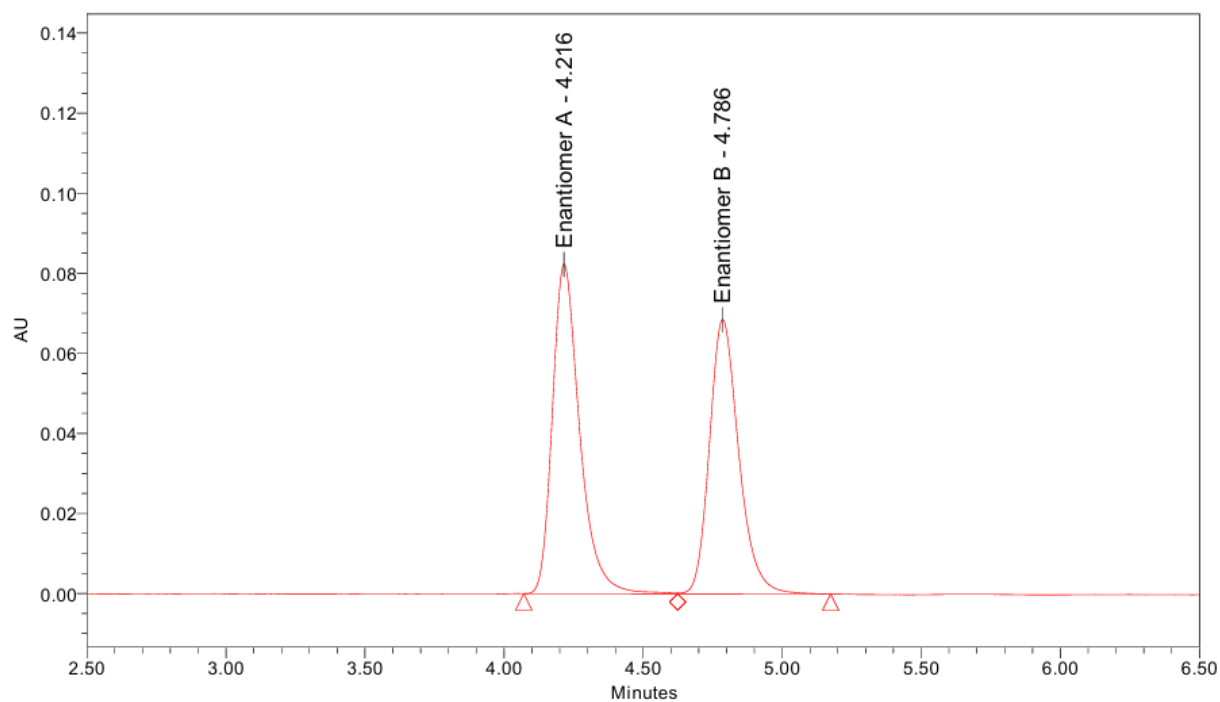

### Enantioenriched-12b

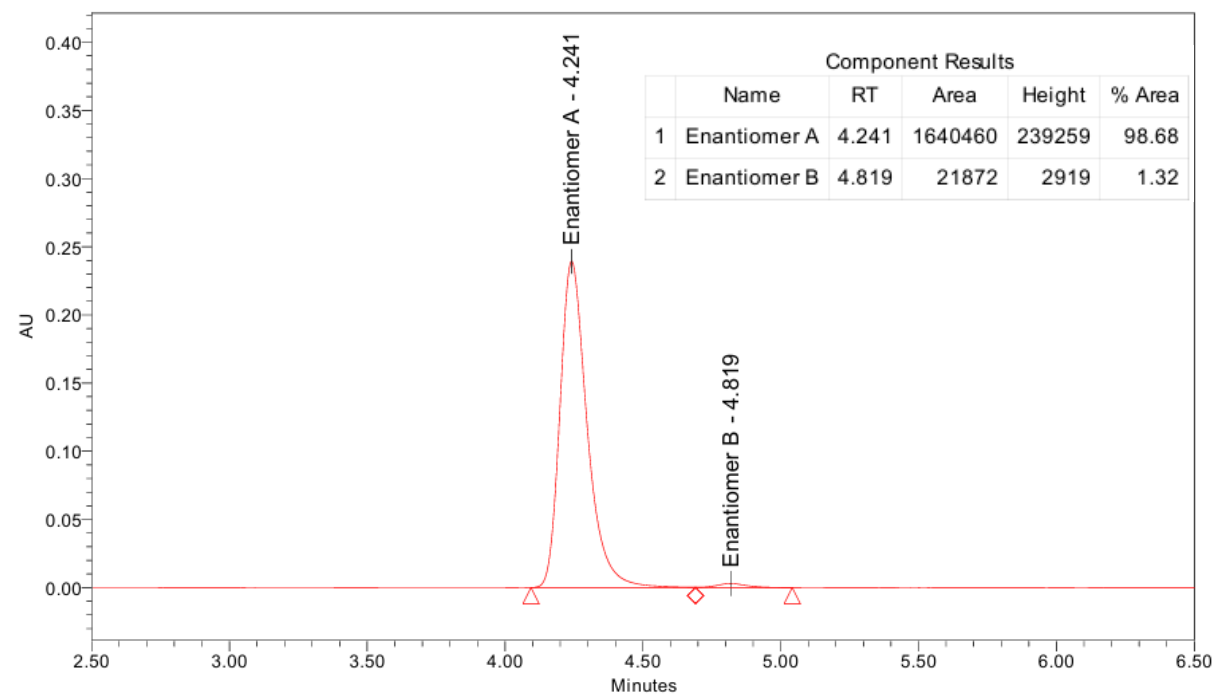

Machine: Waters MDLC; Column: Daicel CHIRALPAK IG-U (3.0 x 100 mm), 1.6  $\mu$ m;  
Eluent: MeCN:H<sub>2</sub>O = 90:10, isocratic 0.5 mL/min, 303 K. Detection : 254 nm.

### Racemic-13b

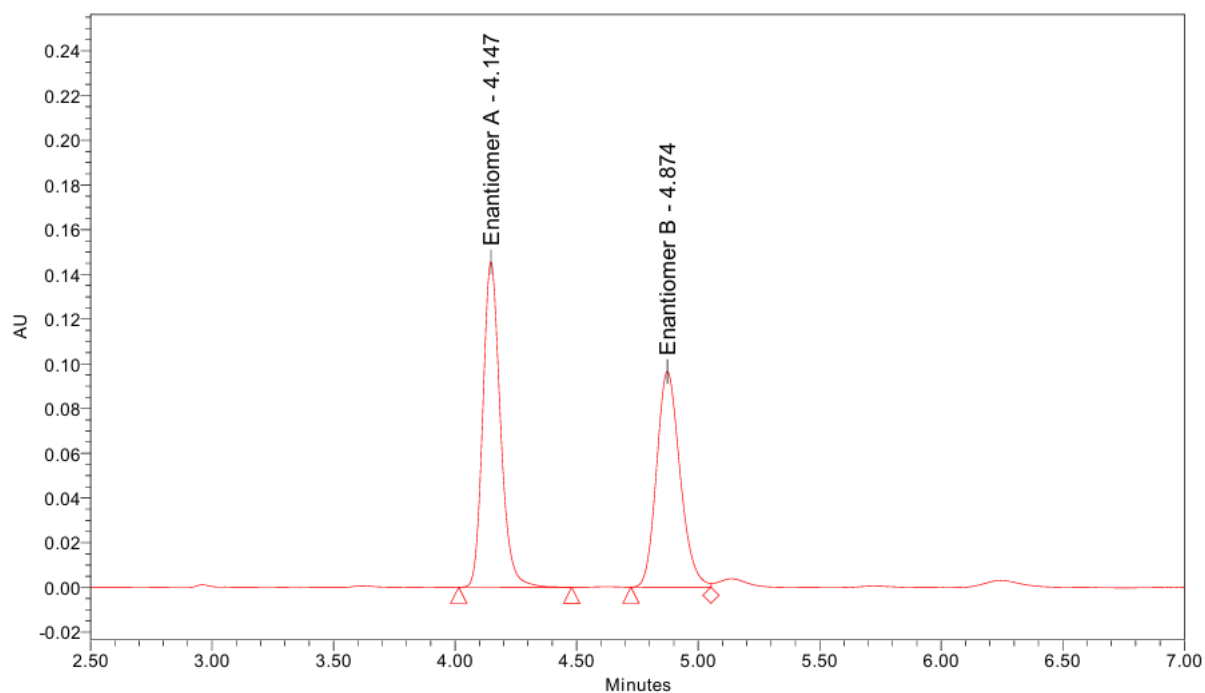

### Enantioenriched-13b

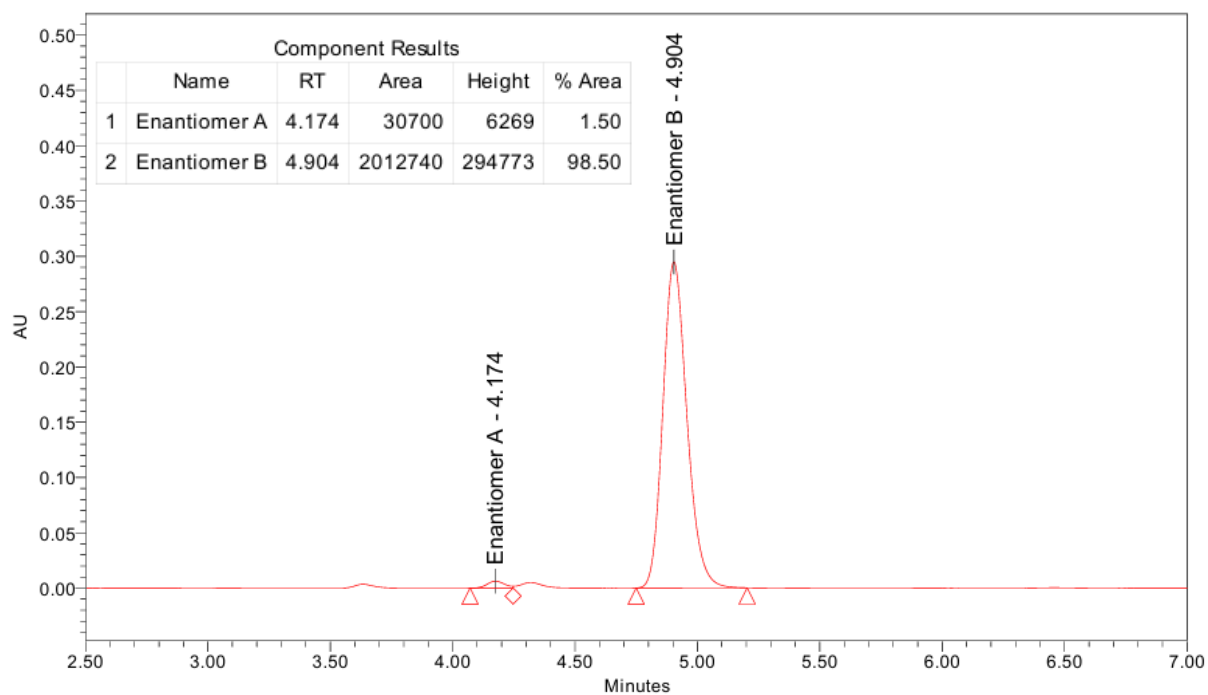

## 5. Electro-Optical Properties

### 5.1. Absorption (UV-vis) and Fluorescence spectra

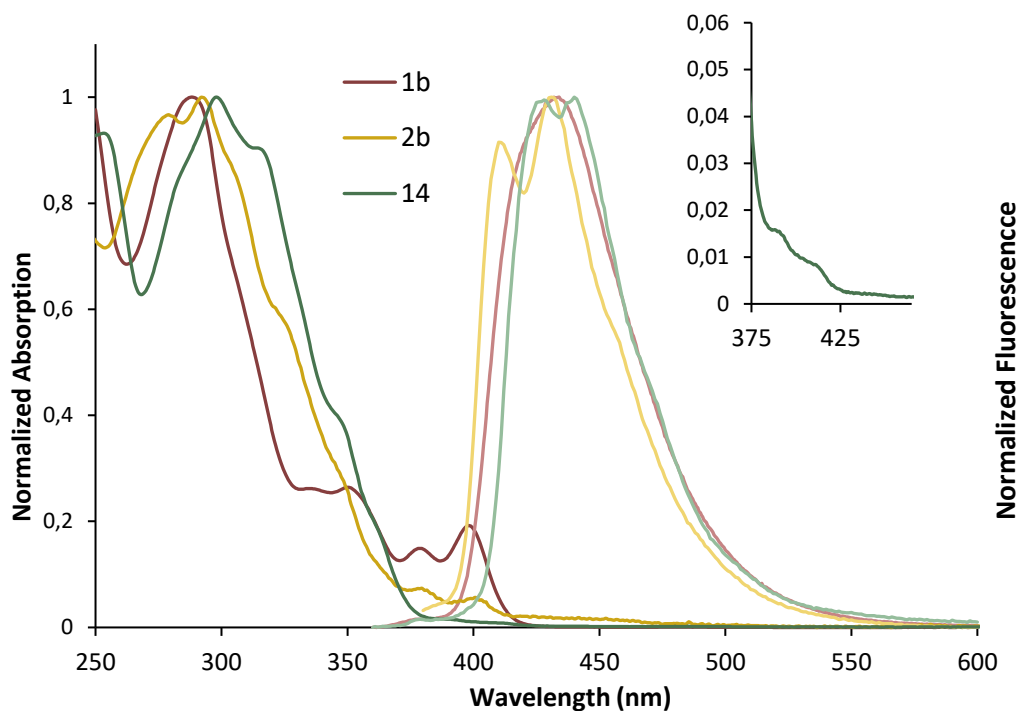

**Figure S1** Normalised UV/Vis (solid line) and fluorescence (faded line) spectra of selected compounds measured in  $\text{CH}_2\text{Cl}_2$  ( $1 \times 10^{-5}$  M to  $2 \times 10^{-5}$  M) at r.t.  $\lambda_{\text{exc}}=350$  nm;  $\lambda_{\text{exc}}=370$  nm (compound 2b).

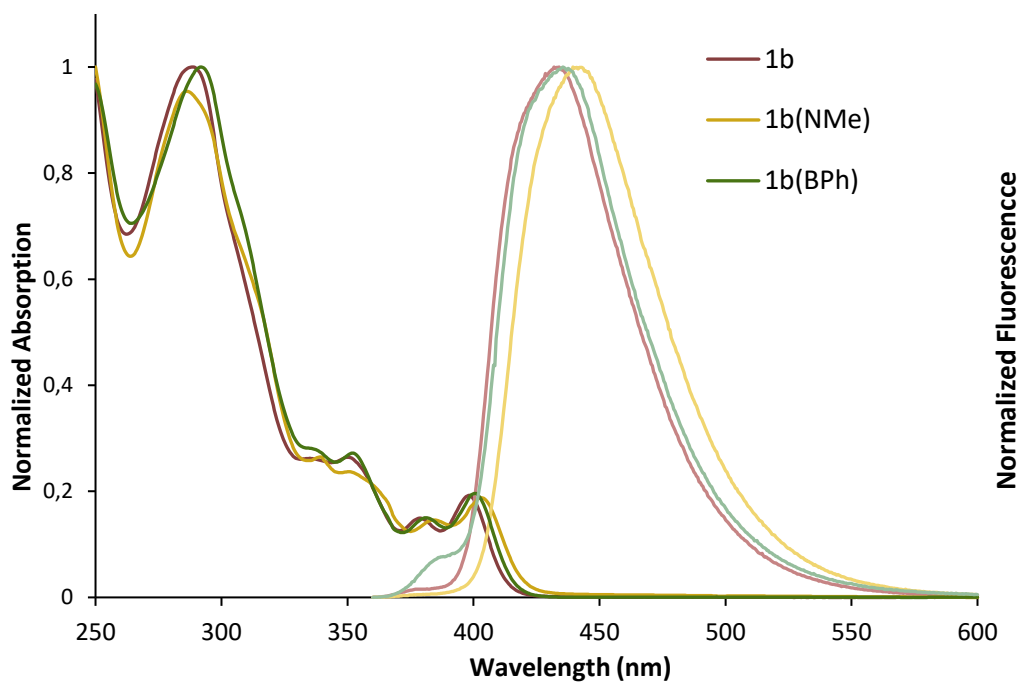

**Figure S2** Normalised UV/Vis (solid line) and fluorescence (faded line) spectra of selected compounds measured in  $\text{CH}_2\text{Cl}_2$  ( $1 \times 10^{-5}$  M to  $2 \times 10^{-5}$  M) at r.t.  $\lambda_{\text{exc}}=350$  nm.

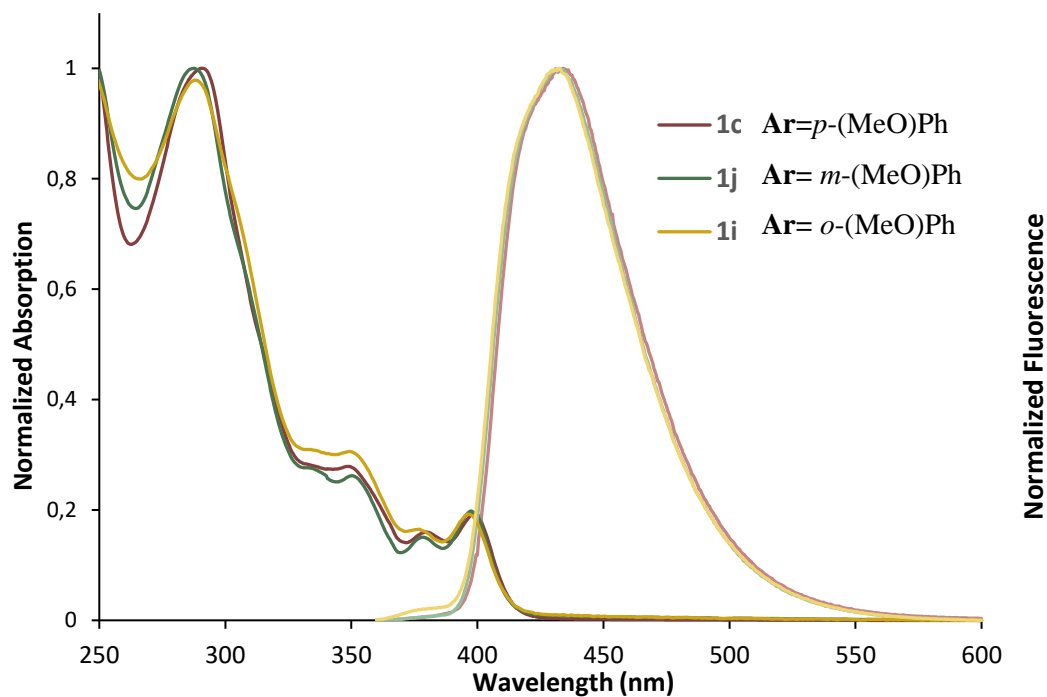

**Figure S3** Normalised UV/Vis (solid line) and fluorescence (faded line) spectra of selected compounds measured in  $\text{CH}_2\text{Cl}_2$  ( $1 \times 10^{-5}$  M) at r.t.  $\lambda_{\text{exc}} = 350$  nm.

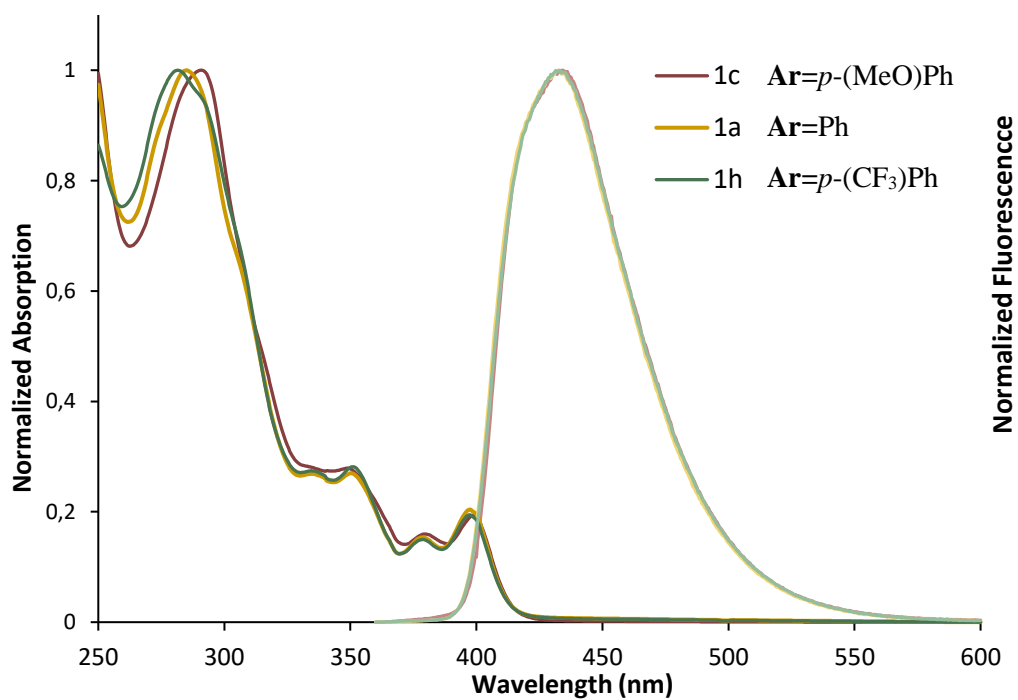

**Figure S4** Normalised UV/Vis (solid line) and fluorescence (faded line) spectra of selected compounds measured in  $\text{CH}_2\text{Cl}_2$  ( $1 \times 10^{-5}$  M) at r.t.  $\lambda_{\text{exc}} = 350$  nm.

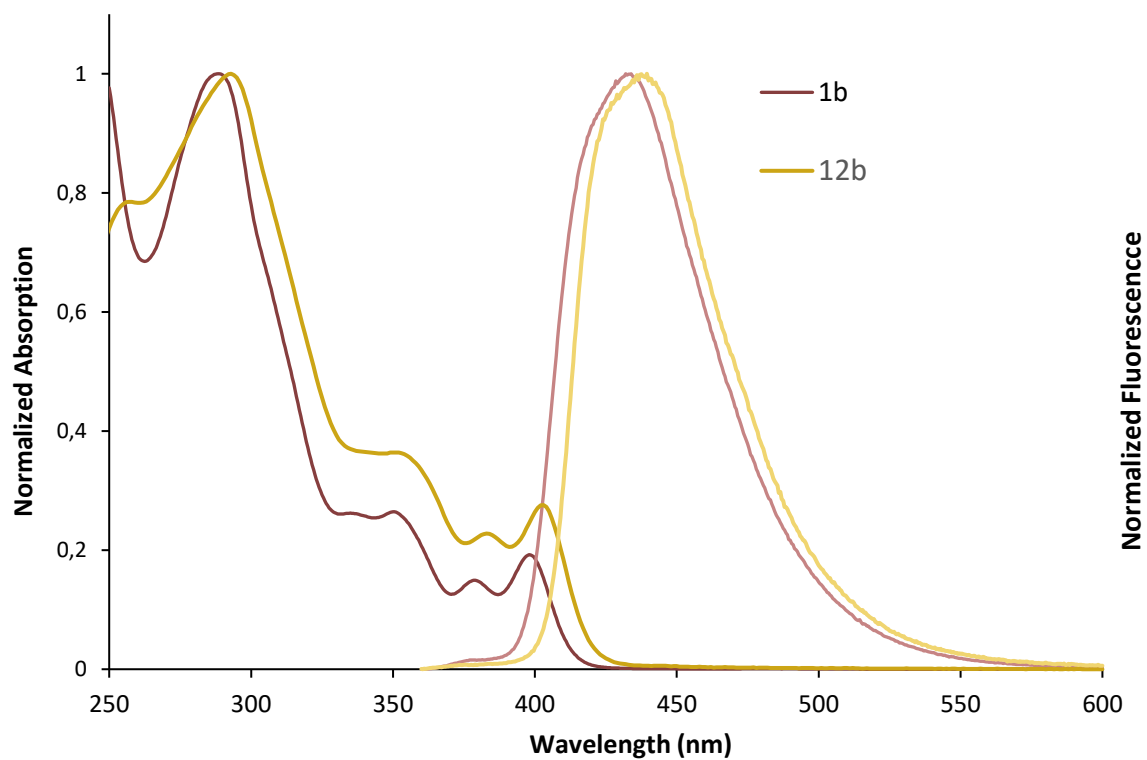

**Figure S5** Normalised UV/Vis (solid line) and fluorescence (faded line) spectra of selected compounds measured in  $\text{CH}_2\text{Cl}_2$  ( $1 \times 10^{-5} \text{ M}$  to  $2 \times 10^{-5} \text{ M}$ ) at r.t.  $\lambda_{\text{exc}} = 350 \text{ nm}$ .

## 5.2. Quantum Yield

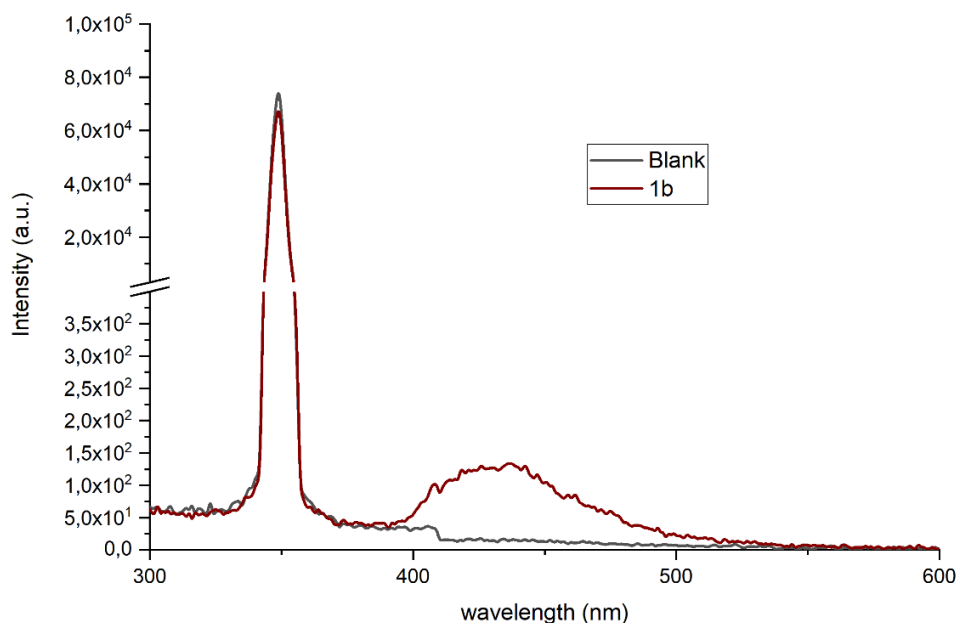

**Figure S6** Emission spectra of blank and helicene **1b** measured with an integrating sphere under identical conditions,  $\lambda_{\text{ex}} = 350$  nm. Background correction was applied to the blank spectrum prior to subtraction.  $\Phi_f = 0.20$

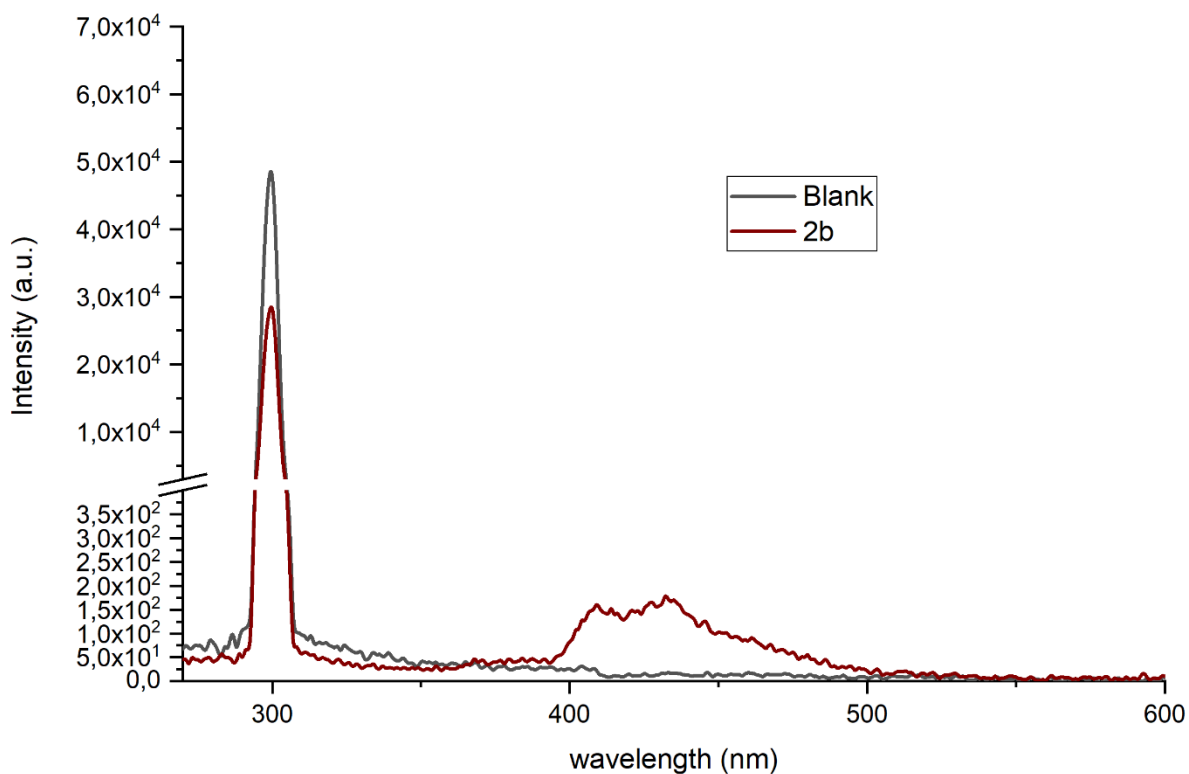

**Figure S7** Emission spectra of blank and helicene **2b** measured with an integrating sphere under identical conditions,  $\lambda_{\text{ex}} = 300$  nm. Background correction was applied to the blank spectrum prior to subtraction.  $\Phi_f = 0.10$

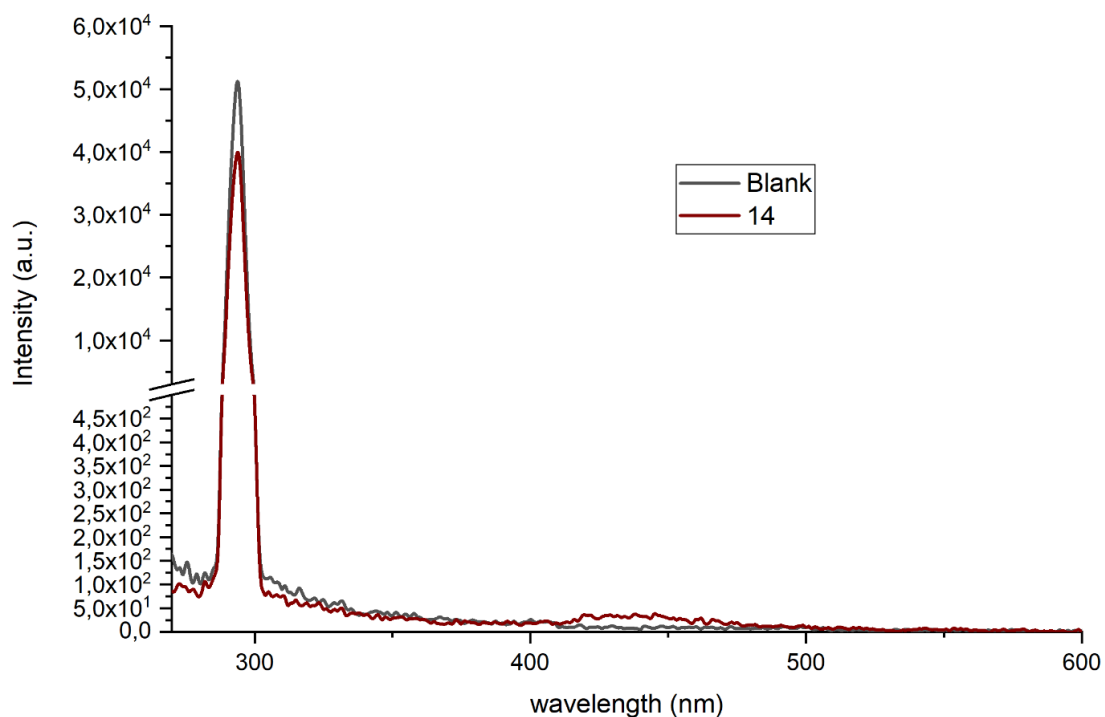

**Figure S8** Emission spectra of blank and helicene **14** measured with an integrating sphere under identical conditions,  $\lambda_{\text{ex}} = 295 \text{ nm}$ . Background correction was applied to the blank spectrum prior to subtraction.  $\Phi_f = 0.02$

### 5.3. Lifetime measurement

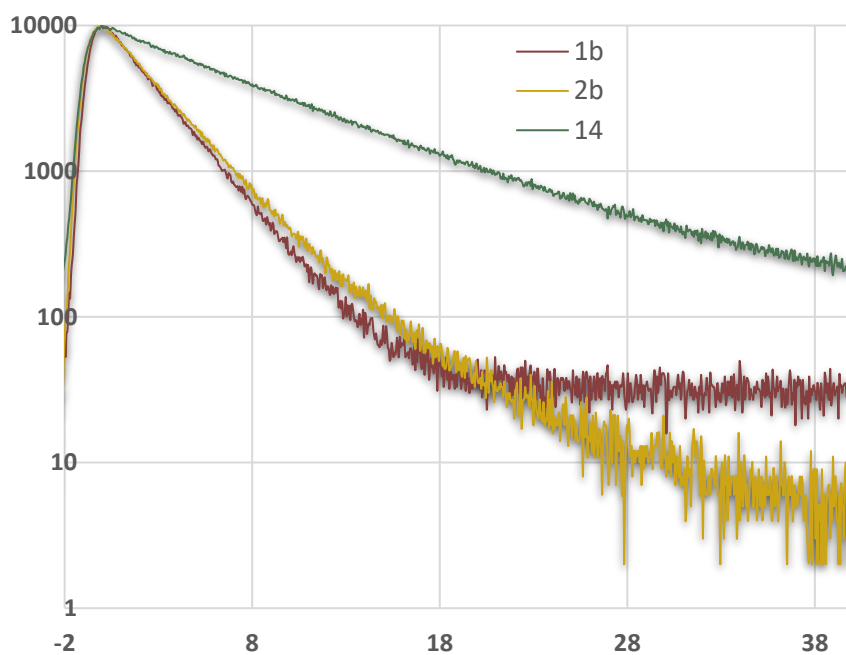

**Figure S9** Fluorescence decay profiles

#### 5.4. Circular Dichroism of Helicenes

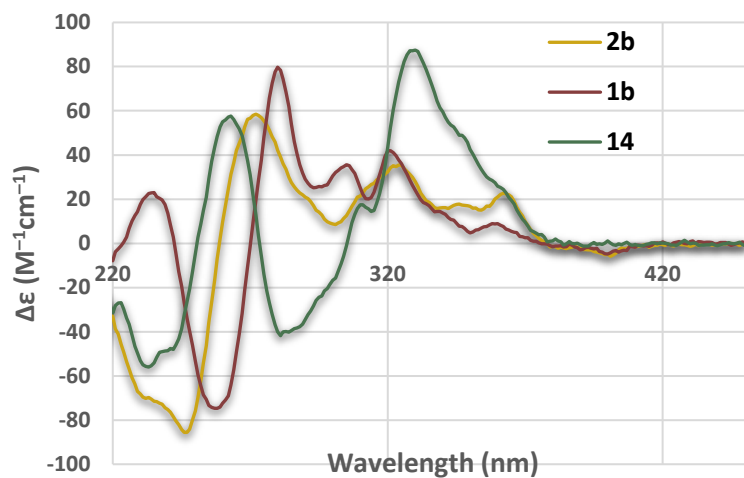

**Figure S10** Circular Dichroism (80  $\mu M$  in DCM) of selected helicenes **2b**, **1b** and **14**.

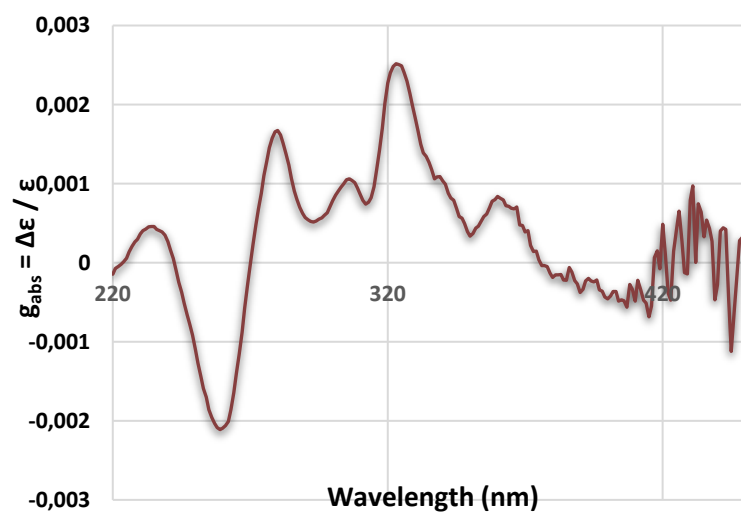

**Figure S11** Plot for the absorption dissymmetry factor ( $g_{abs}$ ) of **1b** in DCM solution

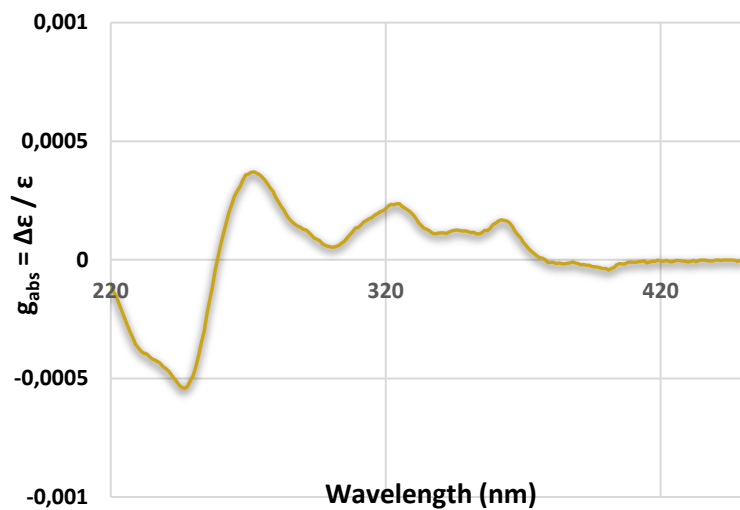

*Figure S12* Plot for the absorption dissymmetry factor ( $g_{\text{abs}}$ ) of **2b** in DCM solution

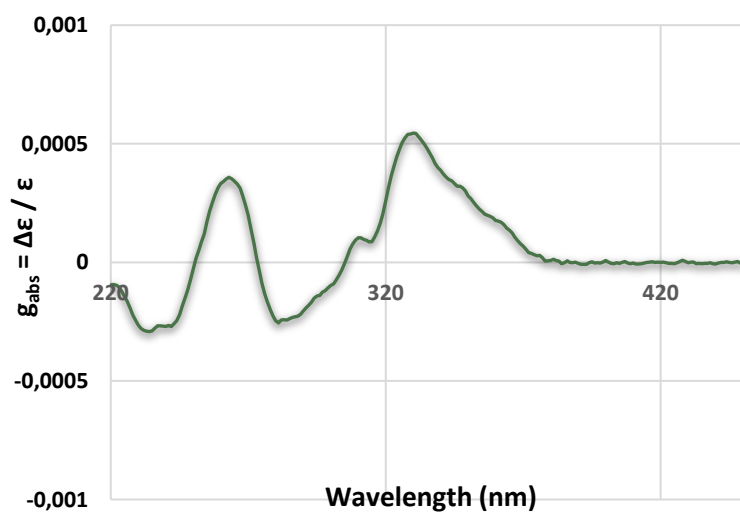

*Figure S13* Plot for the absorption dissymmetry factor ( $g_{\text{abs}}$ ) of **14** in DCM solution

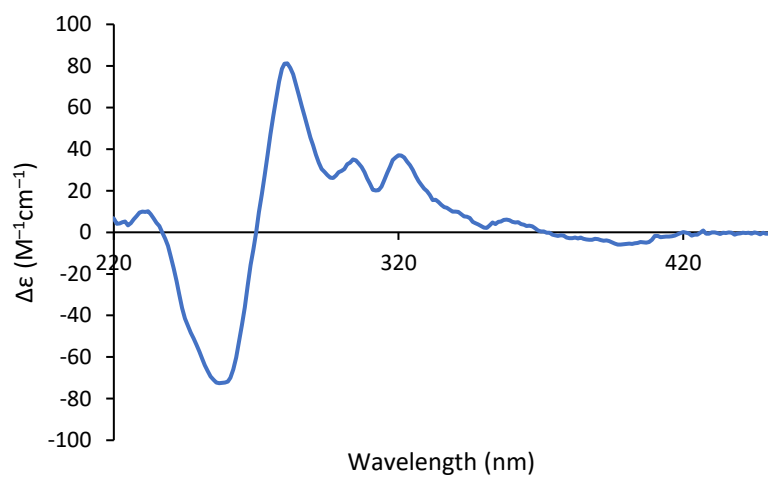

**Figure S14** Circular Dichroism (80  $\mu\text{M}$  in DCM) of Helicene **1a**.

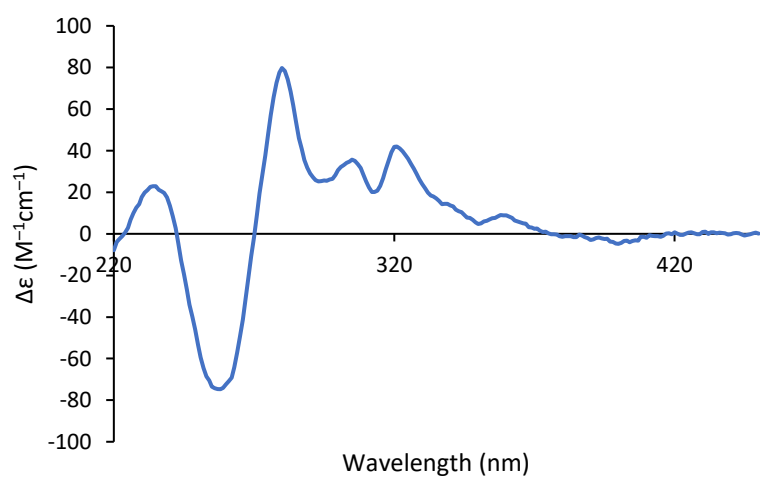

**Figure S15** Circular Dichroism (80  $\mu\text{M}$  in DCM) of Helicene **1b**.

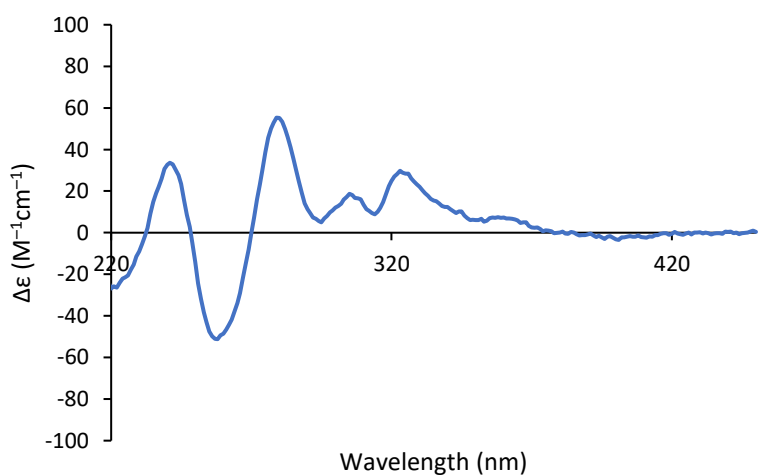

**Figure S16** Circular Dichroism (80  $\mu\text{M}$  in DCM) of Helicene **1c**.

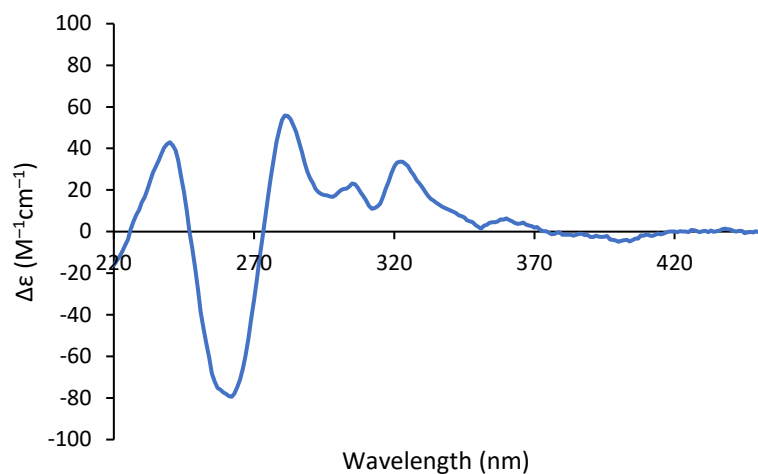

**Figure S17** Circular Dichroism (80  $\mu$ M in DCM) of Helicene **1d**.

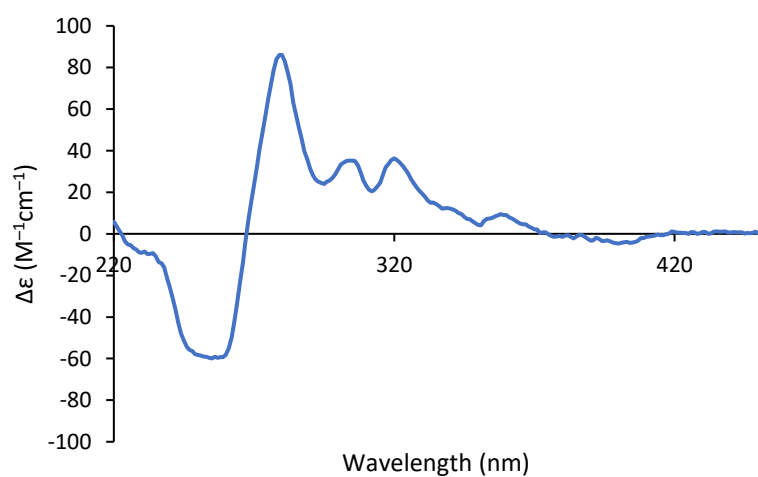

**Figure S18** Circular Dichroism (80  $\mu$ M in DCM) of Helicene **1e**.

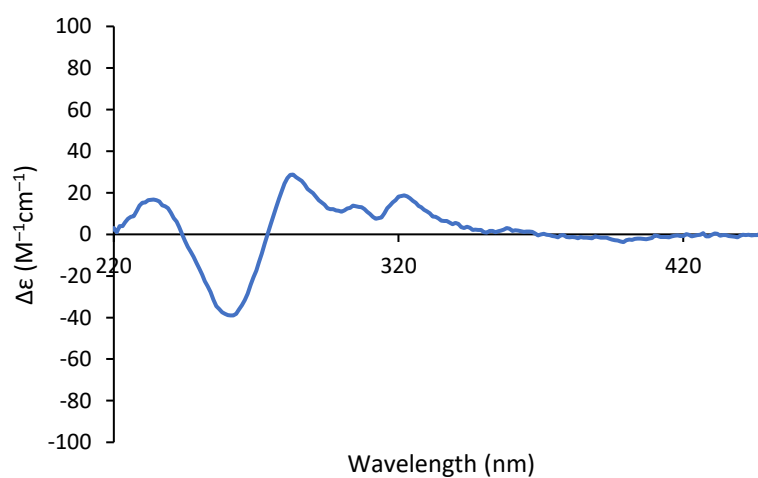

**Figure S19** Circular Dichroism (80  $\mu$ M in DCM) of Helicene **1f**.

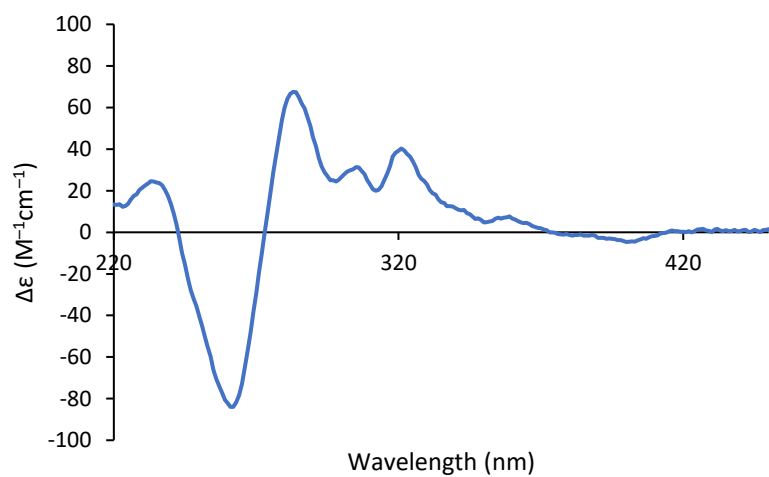

**Figure S20** Circular Dichroism (80  $\mu\text{M}$  in DCM) of Helicene **1g**.

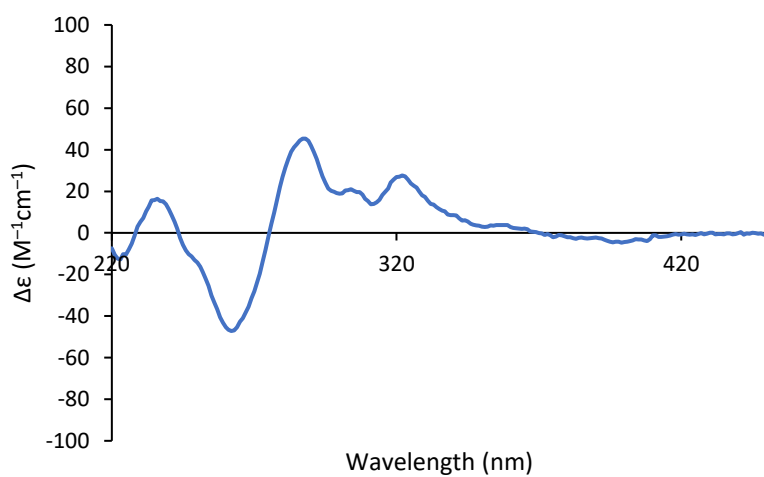

**Figure S21** Circular Dichroism (80  $\mu\text{M}$  in DCM) of Helicene **1h**.

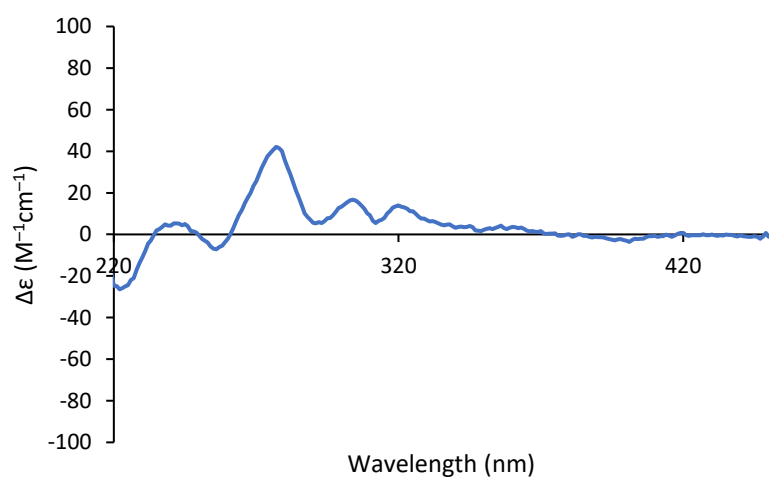

**Figure S22** Circular Dichroism (80  $\mu\text{M}$  in DCM) of Helicene **1i**.

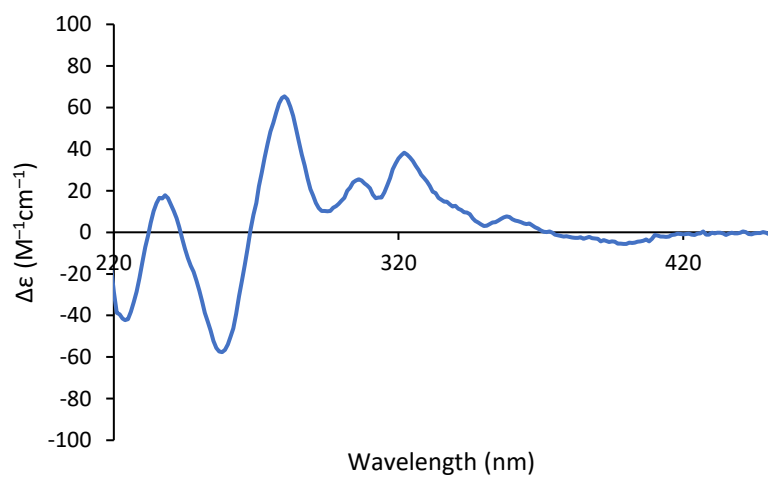

**Figure S23** Circular Dichroism (80  $\mu\text{M}$  in DCM) of Helicene **1j**.

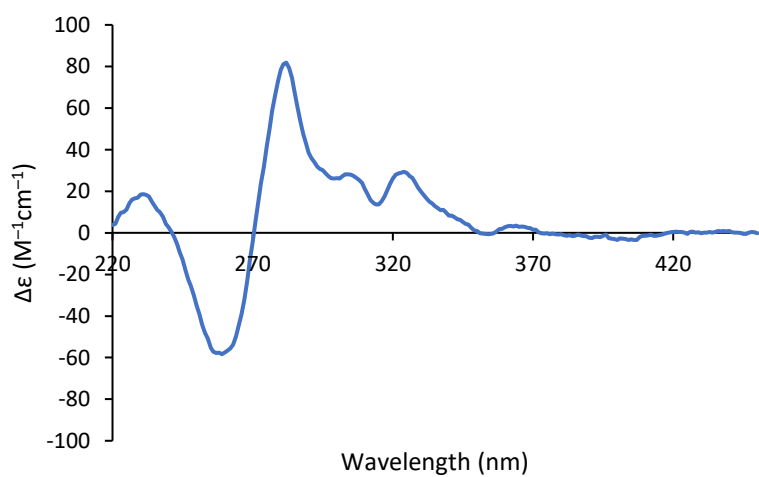

**Figure S24** Circular Dichroism (80  $\mu\text{M}$  in DCM) of Helicene **1b(BPh)**.

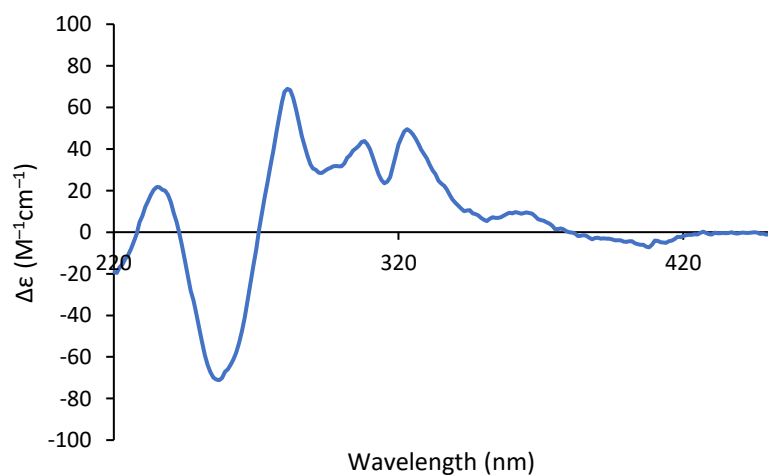

**Figure S25** Circular Dichroism (80  $\mu\text{M}$  in DCM) of Helicene **1b(NMe)**.

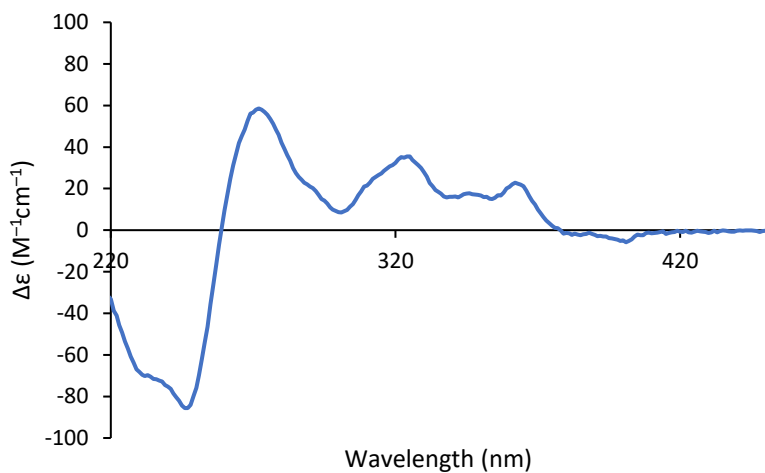

**Figure S26** Circular Dichroism (80  $\mu\text{M}$  in DCM) of Helicene **2b**.

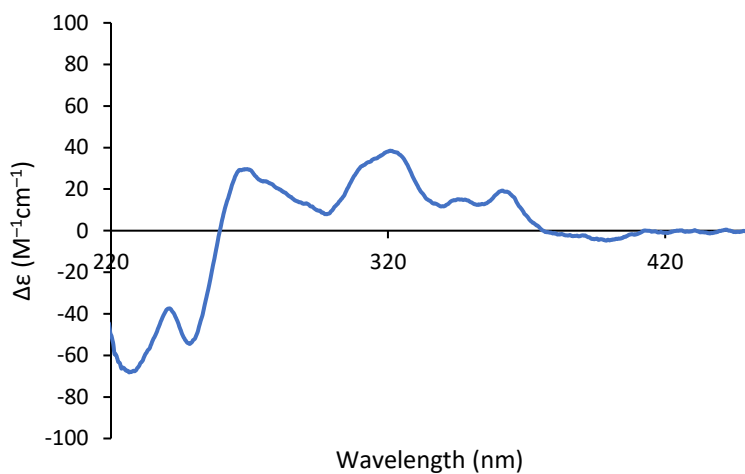

**Figure S27** Circular Dichroism (80  $\mu\text{M}$  in DCM) of Helicene **2c**.

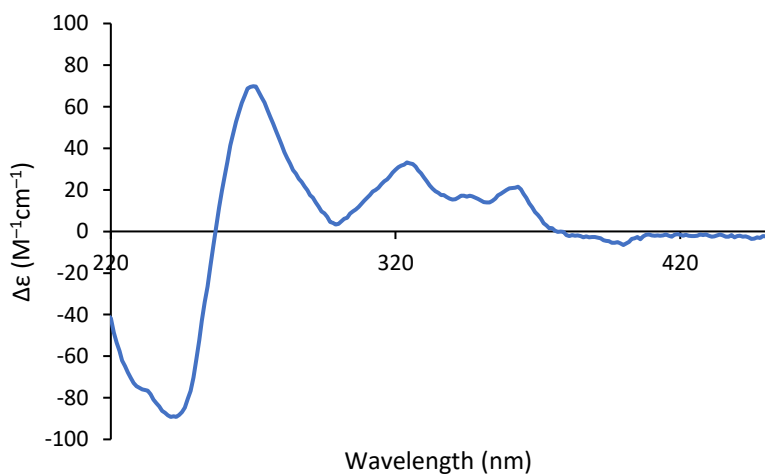

**Figure S28** Circular Dichroism (80  $\mu\text{M}$  in DCM) of Helicene **2e**.

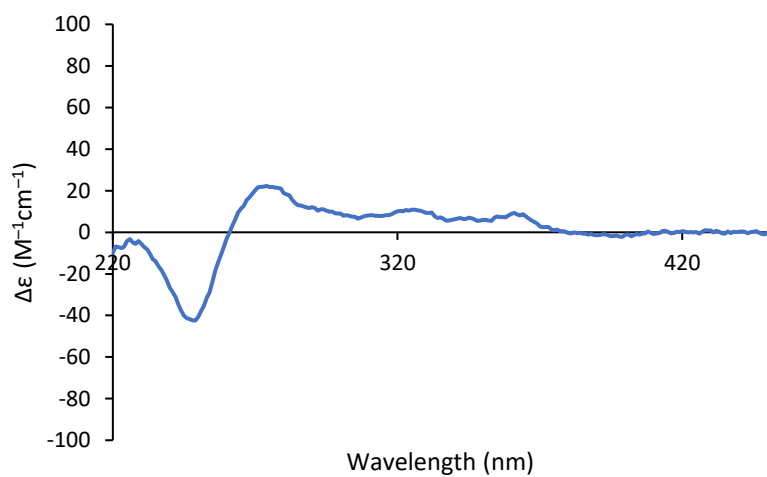

**Figure S29** Circular Dichroism (80 μM in DCM) of Helicene **2h**.

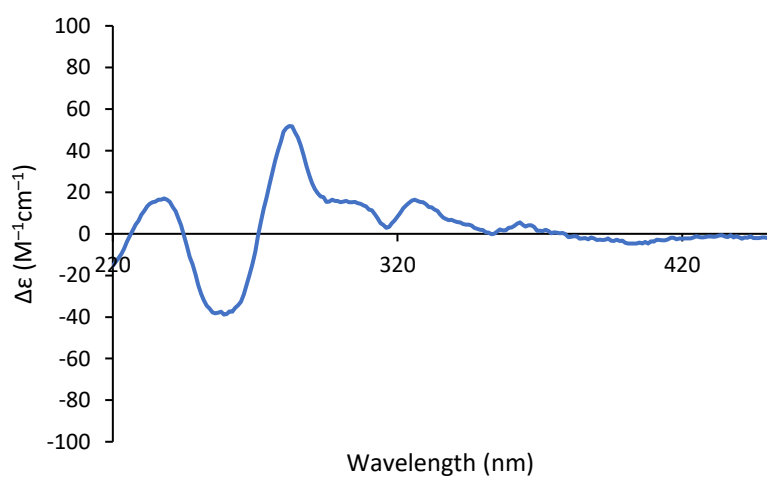

**Figure S30** Circular Dichroism (80 μM in DCM) of Helicene **12b**.

## 5.5. Circular Polarized Luminescence of Helicenes

For helicenes **1i** and **1b(NMe)**,  $g_{\text{lum}}$  values were extracted from the CPL spectra at the emission maximum. For helicenes **1b** and **2b**  $g_{\text{lum}}$  values were obtained from CPL measurements at three wavelengths around the emission maximum to minimize acquisition time due to sample decomposition; full CPL spectra were measured separately.

For helicene **1b**  $g_{\text{lum}}$  was determined from CPL measurements at 430–432 nm (1 s per point, 3 points), with 500 scans averaged.

For helicene **2b**  $g_{\text{lum}}$  was determined from CPL measurements at 430–433 nm (1 s per point, 3 points), with 50 scans averaged.

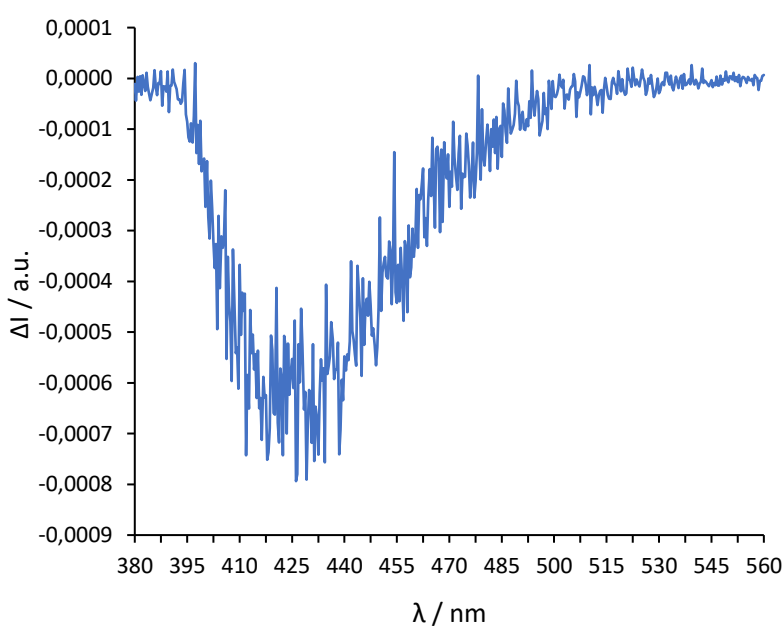

**Figure S31** CPL spectrum of helicene **1i** ( $1.0 \times 10^{-5}$  M in  $\text{CH}_2\text{Cl}_2$ ,  $\lambda_{\text{exc}}=310$  nm); the spectrum (380–560 nm, 3 s per point, 481 points) was averaged from 31 scans;  $g_{\text{lum}}= -8.4 \times 10^{-4}$  (438 nm).

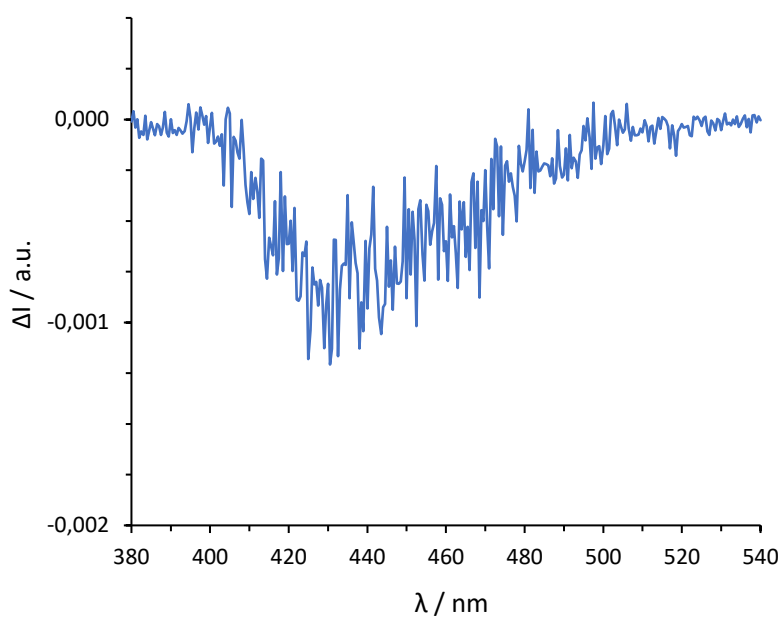

**Figure S32** CPL spectrum of helicene **1b(NMe)** ( $1.0 \times 10^{-5}$  M in  $\text{CH}_2\text{Cl}_2$ ,  $\lambda_{\text{exc}}=310$  nm); the spectrum (380–540 nm, 3 s per point, 321 points) was averaged from 82 scans;  $g_{\text{lum}} = -1.1 \times 10^{-3}$  (438 nm).

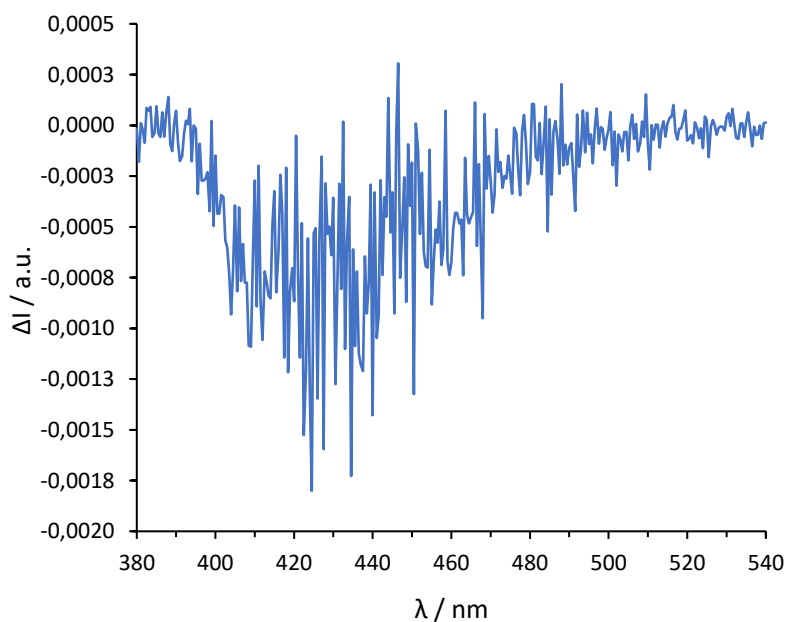

**Figure S33** CPL spectrum of helicene **1b** ( $1.0 \times 10^{-5}$  M in  $\text{CH}_2\text{Cl}_2$ ,  $\lambda_{\text{exc}}=310$  nm); the spectrum (380–540 nm, 2 s per point, 321 points) was averaged from 30 scans, sample refreshed every 3 scans;  $g_{\text{lum}} = -1.0 \times 10^{-3}$  (432 nm). For  $g_{\text{lum}}$  determination: 430–432 nm, 1 s per point, 3 points, averaged from 500 scans.

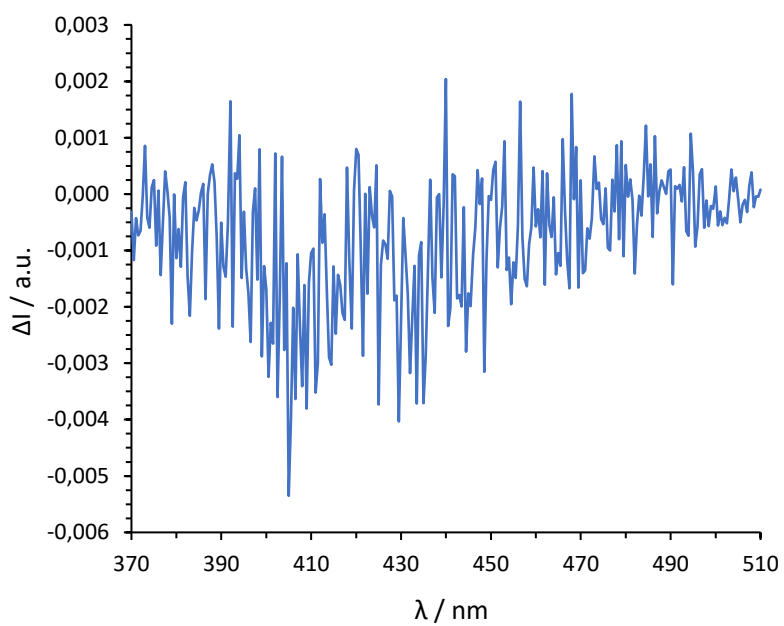

**Figure S34** CPL spectrum of helicene **2b** ( $1.0 \times 10^{-5}$  M in  $\text{CH}_2\text{Cl}_2$ ,  $\lambda_{\text{exc}}=270$  nm); the spectrum (370–510 nm, 1 s per point, 281 points) was averaged from 29 scans;  $g_{\text{lum}} = -1.7 \times 10^{-3}$  (430 nm).

## 6. Racemization Experiments

An enantio-enriched helicene (**1b**) was dissolved in 1,2,4-trichlorobenzene (1.5 mL), and the solution was heated at the indicated temperature. The time-course of enantiomeric ratio was monitored by HPLC. Helicenes **1b** and **2b** were used as model compounds for the experiments.

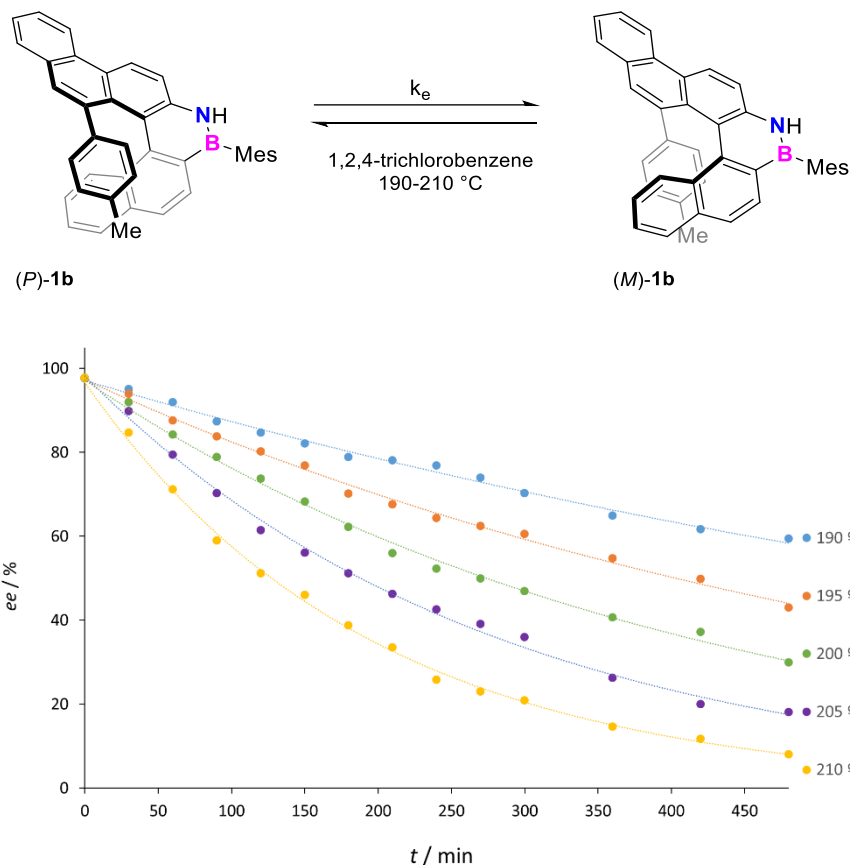

**Figure S35** Time course of the ee of **1b** over time at various temperatures.

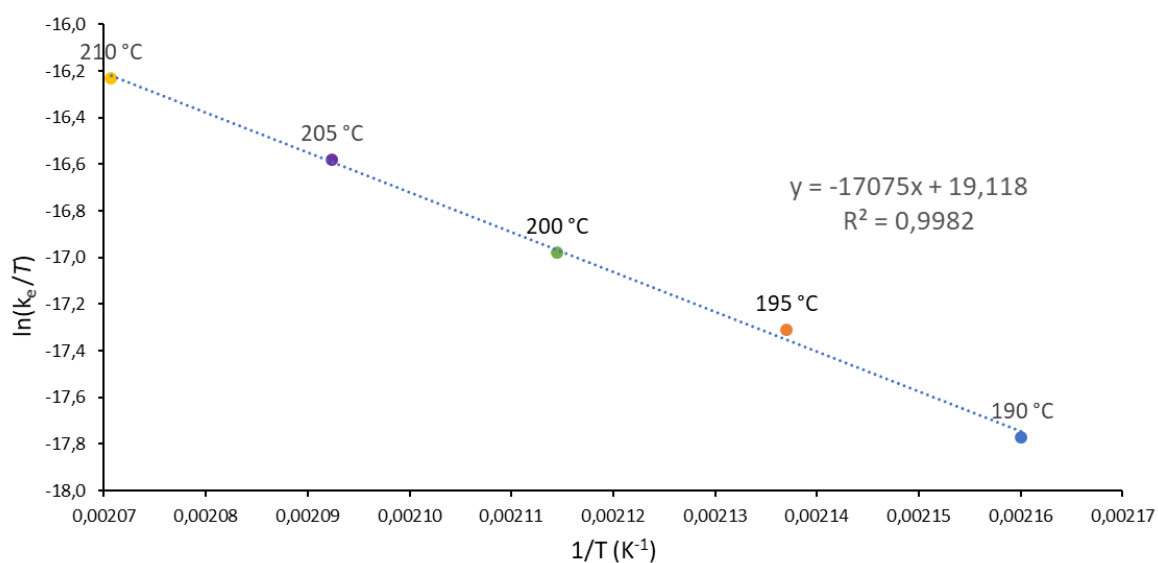

**Figure S36** Eyring plot for **1b**.

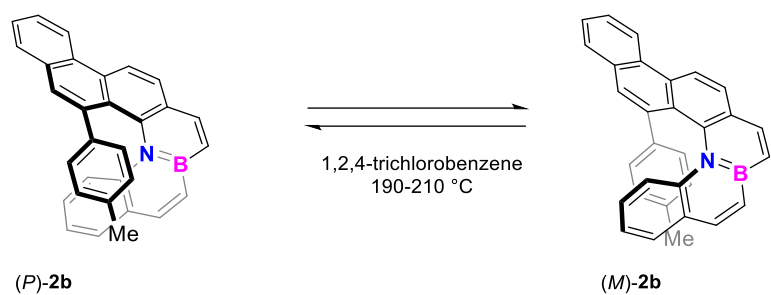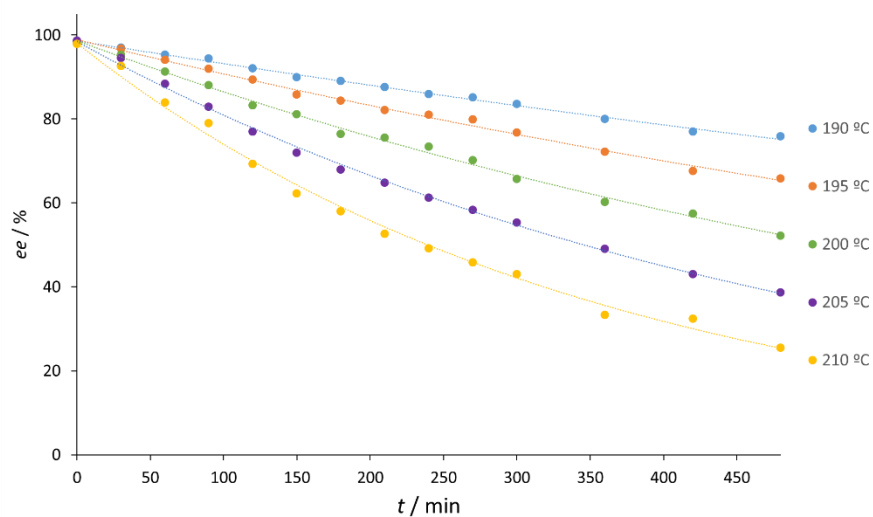

**Figure S37** Time course of the ee of **2b** over time at various temperatures.

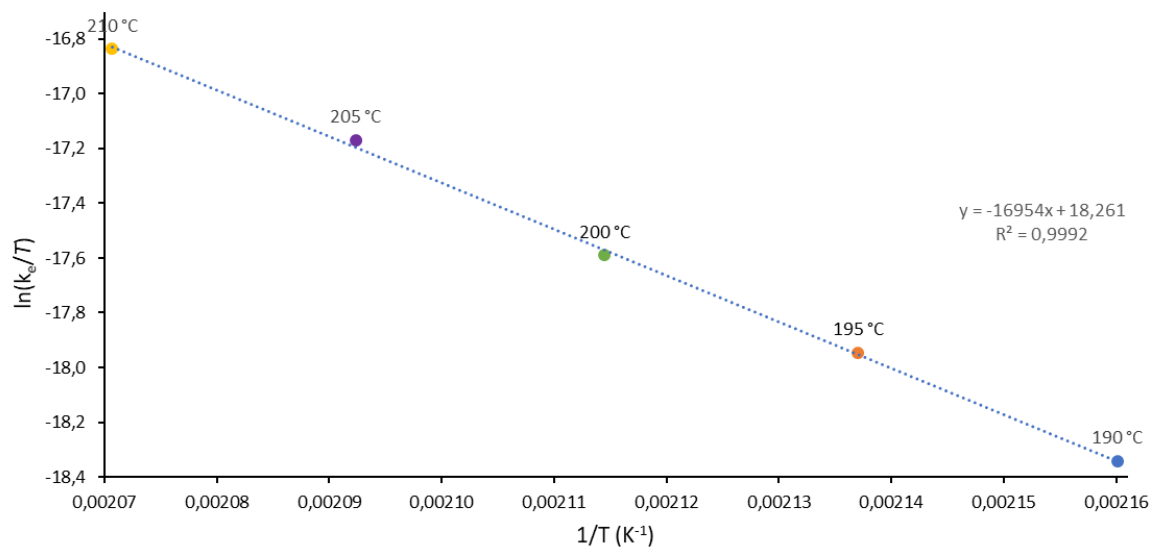

**Figure S38** Eyring plot for **2b**.

## 7. Crystallographic Supplement

### 7.1. **1b**•MeCN

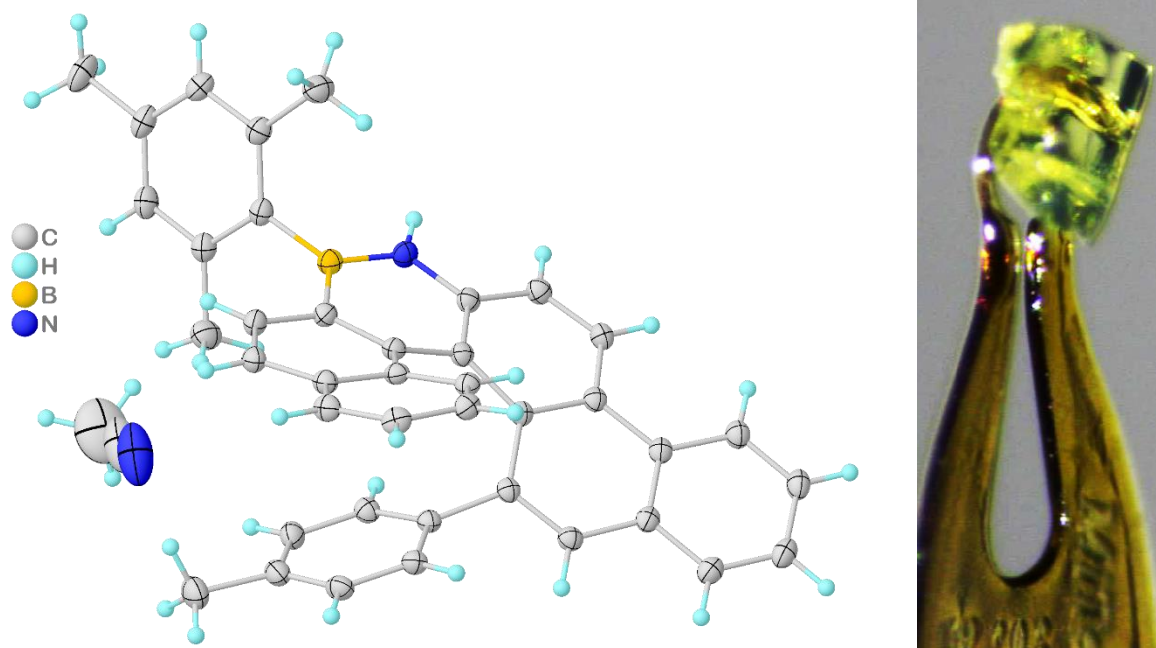

**Figure S39:** Full asymmetric unit of **1b**•MeCN. Anisotropic displacement ellipsoids drawn at 50% probability level. Single crystals were obtained from a solution in acetonitrile.

|                                           |                                                                  |
|-------------------------------------------|------------------------------------------------------------------|
| CCDC number                               | 2506342                                                          |
| Empirical formula                         | C <sub>42</sub> H <sub>35</sub> BN <sub>2</sub>                  |
| Formula weight                            | 578.53                                                           |
| Temperature [K]                           | 100.00                                                           |
| Crystal system                            | Orthorhombic                                                     |
| Space group (number)                      | <i>P</i> 2 <sub>1</sub> 2 <sub>1</sub> 2 <sub>1</sub> (19)       |
| <i>a</i> [Å]                              | 8.3302(6)                                                        |
| <i>b</i> [Å]                              | 12.2120(9)                                                       |
| <i>c</i> [Å]                              | 31.850(2)                                                        |
| $\alpha$ [°]                              | 90                                                               |
| $\beta$ [°]                               | 90                                                               |
| $\gamma$ [°]                              | 90                                                               |
| Volume [Å <sup>3</sup> ]                  | 3240.1(4)                                                        |
| <i>Z</i>                                  | 4                                                                |
| $\rho_{\text{calc}}$ [gcm <sup>-3</sup> ] | 1.186                                                            |
| $\mu$ [mm <sup>-1</sup> ]                 | 0.517                                                            |
| <i>F</i> (000)                            | 1224                                                             |
| Crystal size [mm <sup>3</sup> ]           | 0.353×0.291×0.247                                                |
| Crystal colour                            | Colourless                                                       |
| Crystal shape                             | Block                                                            |
| Radiation                                 | CuK $\alpha$ ( $\lambda$ =1.54178 Å)                             |
| 2 $\theta$ range [°]                      | 7.75 to 157.70 (0.79 Å)                                          |
| Index ranges                              | -10 ≤ <i>h</i> ≤ 9<br>-15 ≤ <i>k</i> ≤ 15<br>-40 ≤ <i>l</i> ≤ 40 |

|                                                                   |                                                                  |
|-------------------------------------------------------------------|------------------------------------------------------------------|
| Reflections collected                                             | 97003                                                            |
| Independent reflections                                           | 6984<br>$R_{\text{int}} = 0.0458$<br>$R_{\text{sigma}} = 0.0177$ |
| Completeness to $\theta = 67.679^\circ$                           | 100.0 %                                                          |
| Data / Restraints / Parameters                                    | 6984/1/416                                                       |
| Absorption correction<br>$T_{\text{min}}/T_{\text{max}}$ (method) | 0.7575/0.9830<br>(numerical)                                     |
| Goodness-of-fit on $F^2$                                          | 1.033                                                            |
| Final <i>R</i> indexes [ $I \geq 2\sigma(I)$ ]                    | $R_1 = 0.0312$<br>$wR_2 = 0.0831$                                |
| Final <i>R</i> indexes [all data]                                 | $R_1 = 0.0315$<br>$wR_2 = 0.0833$                                |
| Largest peak/hole [eÅ <sup>-3</sup> ]                             | 0.21/-0.17                                                       |
| Flack X parameter                                                 | -0.07(9)                                                         |
| Extinction coefficient                                            | 0.0038(3)                                                        |

7.2. **1d**·CH<sub>2</sub>Cl<sub>2</sub>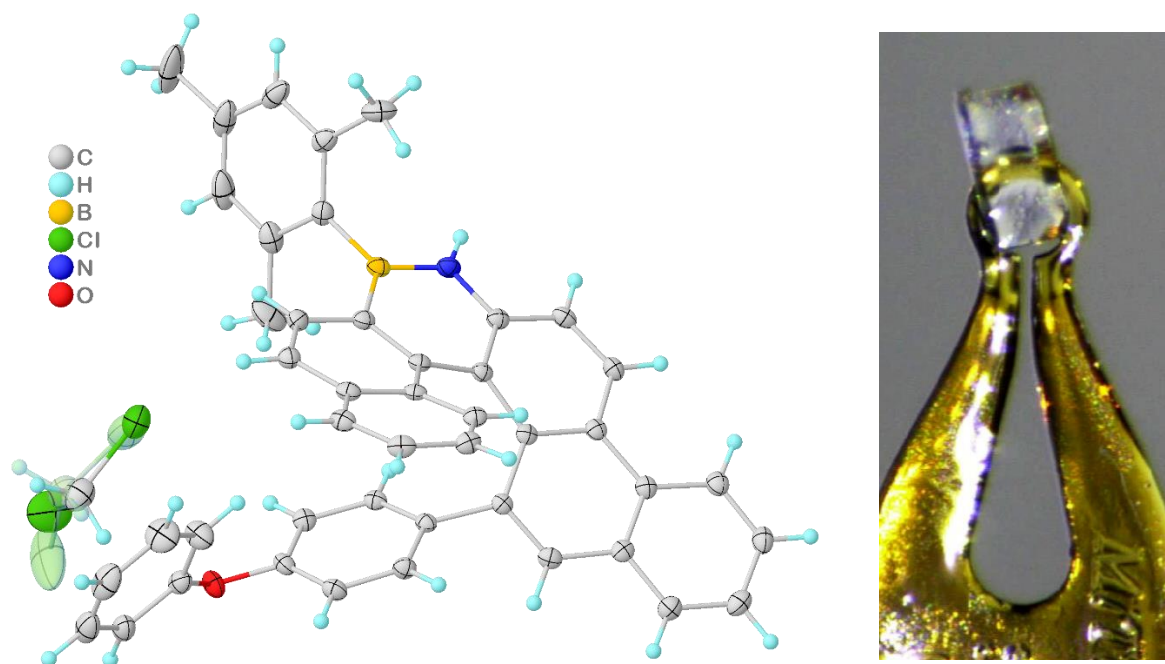

**Figure S40:** Full asymmetric unit of **1d**·CH<sub>2</sub>Cl<sub>2</sub>. Anisotropic displacement ellipsoids drawn at 50% probability level; disordered molecule parts in PART 2 drawn in green hue. The co-crystallized dichloromethane exhibits some positional disorder. Single crystals were obtained from a solution in dichloromethane.

|                                           |                                                     |
|-------------------------------------------|-----------------------------------------------------|
| CCDC number                               | 2506343                                             |
| Empirical formula                         | C <sub>46</sub> H <sub>36</sub> BCl <sub>2</sub> NO |
| Formula weight                            | 700.47                                              |
| Temperature [K]                           | 100.00                                              |
| Crystal system                            | Monoclinic                                          |
| Space group (number)                      | <i>P</i> 2 <sub>1</sub> (4)                         |
| <i>a</i> [Å]                              | 8.4475(2)                                           |
| <i>b</i> [Å]                              | 12.6614(5)                                          |
| <i>c</i> [Å]                              | 16.7944(5)                                          |
| $\alpha$ [°]                              | 90                                                  |
| $\beta$ [°]                               | 91.358(2)                                           |
| $\gamma$ [°]                              | 90                                                  |
| Volume [Å <sup>3</sup> ]                  | 1795.78(10)                                         |
| <i>Z</i>                                  | 2                                                   |
| $\rho_{\text{calc}}$ [gcm <sup>-3</sup> ] | 1.295                                               |
| $\mu$ [mm <sup>-1</sup> ]                 | 1.911                                               |
| <i>F</i> (000)                            | 732                                                 |
| Crystal size [mm <sup>3</sup> ]           | 0.365×0.142×0.06                                    |
| Crystal colour                            | Colourless                                          |
| Crystal shape                             | Plate                                               |
| Radiation                                 | CuK $\alpha$ ( $\lambda$ =1.54178 Å)                |
| 2 $\theta$ range [°]                      | 5.26 to 159.62<br>(0.78 Å)                          |

|                                                                                     |                                                                                |
|-------------------------------------------------------------------------------------|--------------------------------------------------------------------------------|
| Index ranges                                                                        | -10 ≤ <i>h</i> ≤ 10<br>-16 ≤ <i>k</i> ≤ 15<br>-21 ≤ <i>l</i> ≤ 21              |
| Reflections collected                                                               | 70578                                                                          |
| Independent reflections                                                             | 7623<br><i>R</i> <sub>int</sub> = 0.0476<br><i>R</i> <sub>sigma</sub> = 0.0200 |
| Completeness to $\theta = 67.679^\circ$                                             | 100.0 %                                                                        |
| Data / Restraints / Parameters                                                      | 7623/11/496                                                                    |
| Absorption correction<br><i>T</i> <sub>min</sub> / <i>T</i> <sub>max</sub> (method) | 0.6485/0.9468<br>(numerical)                                                   |
| Goodness-of-fit on <i>F</i> <sup>2</sup>                                            | 1.030                                                                          |
| Final <i>R</i> indexes [ <i>I</i> ≥ 2 $\sigma$ ( <i>I</i> )]                        | <i>R</i> <sub>1</sub> = 0.0337<br><i>wR</i> <sub>2</sub> = 0.0875              |
| Final <i>R</i> indexes [all data]                                                   | <i>R</i> <sub>1</sub> = 0.0343<br><i>wR</i> <sub>2</sub> = 0.0882              |
| Largest peak/hole [eÅ <sup>-3</sup> ]                                               | 0.58/-0.46                                                                     |
| Flack X parameter                                                                   | -0.004(5)                                                                      |

|                        |           |
|------------------------|-----------|
| Extinction coefficient | 0.0026(3) |
|------------------------|-----------|

7.3.1e<sup>o</sup>MeCN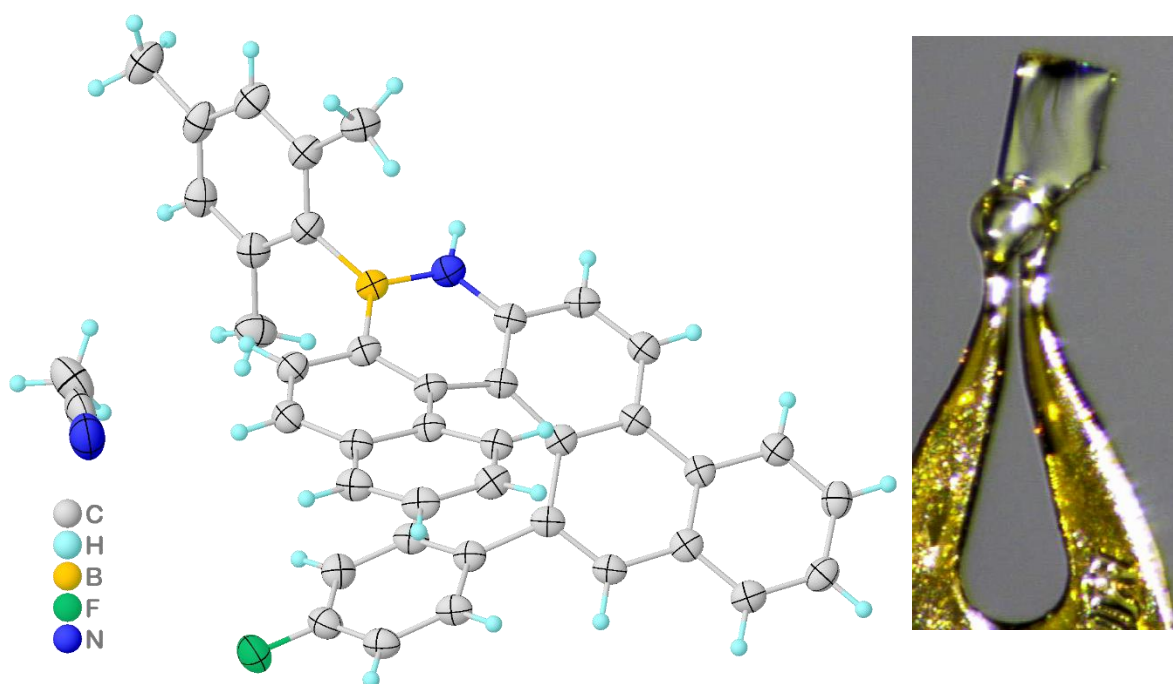

**Figure S41:** Full asymmetric unit of **1e<sup>o</sup>MeCN**. Anisotropic displacement ellipsoids drawn at 50% probability level. Single crystals were obtained from a solution in acetonitrile.

|                                           |                                                                              |
|-------------------------------------------|------------------------------------------------------------------------------|
| CCDC number                               | 2506344                                                                      |
| Empirical formula                         | C <sub>80</sub> H <sub>61</sub> B <sub>2</sub> F <sub>2</sub> N <sub>3</sub> |
| Formula weight                            | 1123.93                                                                      |
| Temperature [K]                           | 100.00                                                                       |
| Crystal system                            | Orthorhombic                                                                 |
| Space group (number)                      | <i>P</i> 2 <sub>1</sub> 2 <sub>1</sub> 2 <sub>1</sub> (19)                   |
| <i>a</i> [Å]                              | 8.2943(11)                                                                   |
| <i>b</i> [Å]                              | 12.2566(7)                                                                   |
| <i>c</i> [Å]                              | 31.139(2)                                                                    |
| $\alpha$ [°]                              | 90                                                                           |
| $\beta$ [°]                               | 90                                                                           |
| $\gamma$ [°]                              | 90                                                                           |
| Volume [Å <sup>3</sup> ]                  | 3165.6(5)                                                                    |
| <i>Z</i>                                  | 2                                                                            |
| $\rho_{\text{calc}}$ [gcm <sup>-3</sup> ] | 1.179                                                                        |
| $\mu$ [mm <sup>-1</sup> ]                 | 0.558                                                                        |
| <i>F</i> (000)                            | 1180                                                                         |
| Crystal size [mm <sup>3</sup> ]           | 0.5×0.144×0.094                                                              |
| Crystal colour                            | Colourless                                                                   |
| Crystal shape                             | Plate                                                                        |
| Radiation                                 | CuK $\alpha$ ( $\lambda$ =1.54178 Å)                                         |
| 2 $\theta$ range [°]                      | 7.75 to 158.86<br>(0.78 Å)                                                   |
| Index ranges                              | -8 ≤ <i>h</i> ≤ 10<br>-15 ≤ <i>k</i> ≤ 15<br>-39 ≤ <i>l</i> ≤ 38             |

|                                                |                                                                  |
|------------------------------------------------|------------------------------------------------------------------|
| Reflections collected                          | 67824                                                            |
| Independent reflections                        | 6826<br>$R_{\text{int}} = 0.0745$<br>$R_{\text{sigma}} = 0.0373$ |
| Completeness to $\theta = 67.679^\circ$        | 99.7 %                                                           |
| Data / Restraints / Parameters                 | 6826/0/410                                                       |
| Absorption correction                          | 0.7580/0.9949<br>(numerical)                                     |
| T <sub>min</sub> /T <sub>max</sub> (method)    |                                                                  |
| Goodness-of-fit on $F^2$                       | 1.117                                                            |
| Final <i>R</i> indexes [ $I \geq 2\sigma(I)$ ] | $R_1 = 0.0688$<br>$wR_2 = 0.2099$                                |
| Final <i>R</i> indexes [all data]              | $R_1 = 0.0716$<br>$wR_2 = 0.2123$                                |
| Largest peak/hole [eÅ <sup>-3</sup> ]          | 0.34/-0.28                                                       |
| Flack X parameter                              | 0.02(10)                                                         |

## 7.4.1f

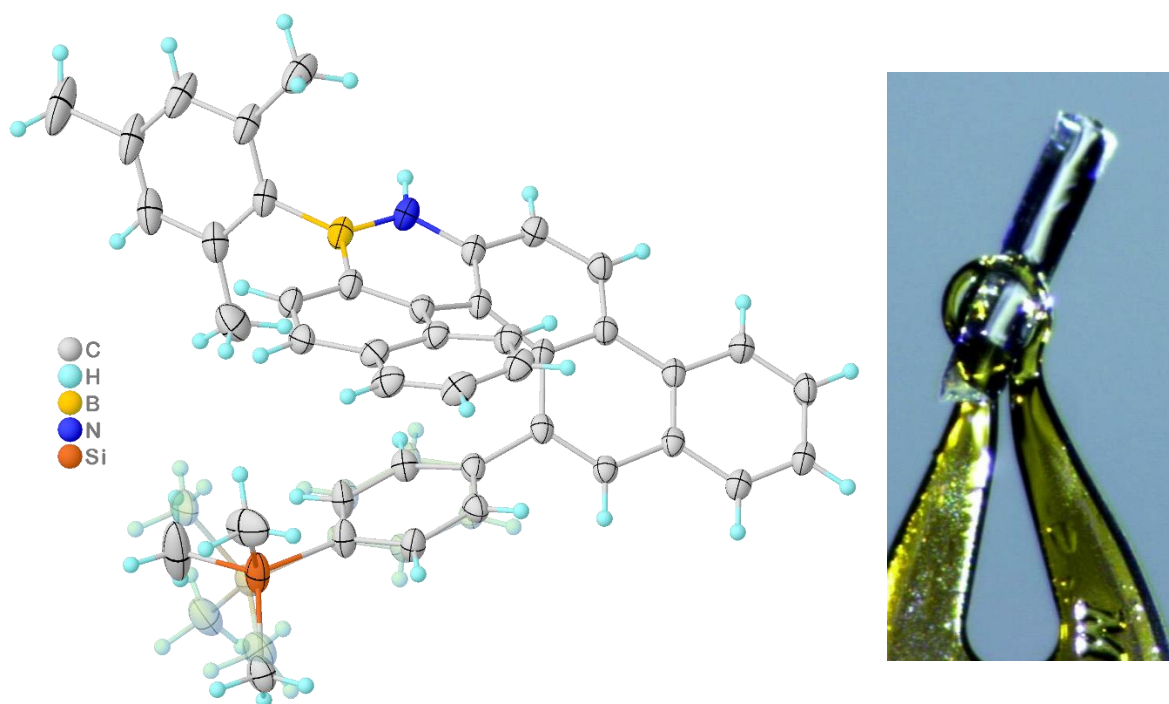

**Figure S42:** Full asymmetric unit of **1f**. Anisotropic displacement ellipsoids drawn at 50% probability level; disordered molecule parts in PART 2 drawn in green hue. Single crystals were obtained from a solution in acetonitrile.

|                                           |                                                            |
|-------------------------------------------|------------------------------------------------------------|
| CCDC number                               | 2506345                                                    |
| Empirical formula                         | C <sub>42</sub> H <sub>38</sub> BNSi                       |
| Formula weight                            | 595.63                                                     |
| Temperature [K]                           | 100.00                                                     |
| Crystal system                            | Orthorhombic                                               |
| Space group (number)                      | <i>P</i> 2 <sub>1</sub> 2 <sub>1</sub> 2 <sub>1</sub> (19) |
| <i>a</i> [Å]                              | 8.2406(9)                                                  |
| <i>b</i> [Å]                              | 13.1465(19)                                                |
| <i>c</i> [Å]                              | 31.983(4)                                                  |
| $\alpha$ [°]                              | 90                                                         |
| $\beta$ [°]                               | 90                                                         |
| $\gamma$ [°]                              | 90                                                         |
| Volume [Å <sup>3</sup> ]                  | 3464.9(8)                                                  |
| <i>Z</i>                                  | 4                                                          |
| $\rho_{\text{calc}}$ [gcm <sup>-3</sup> ] | 1.142                                                      |
| $\mu$ [mm <sup>-1</sup> ]                 | 0.097                                                      |
| <i>F</i> (000)                            | 1264                                                       |
| Crystal size [mm <sup>3</sup> ]           | 0.895×0.101×0.075                                          |
| Crystal colour                            | Colourless                                                 |
| Crystal shape                             | Needle                                                     |
| Radiation                                 | MoK $\alpha$ ( $\lambda$ =0.71073 Å)                       |
| 2 $\theta$ range [°]                      | 4.01 to 54.22 (0.78 Å)                                     |

|                                                                                     |                                                                                |
|-------------------------------------------------------------------------------------|--------------------------------------------------------------------------------|
| Index ranges                                                                        | -10 ≤ <i>h</i> ≤ 10<br>-16 ≤ <i>k</i> ≤ 16<br>-41 ≤ <i>l</i> ≤ 41              |
| Reflections collected                                                               | 109371                                                                         |
| Independent reflections                                                             | 7652<br><i>R</i> <sub>int</sub> = 0.0413<br><i>R</i> <sub>sigma</sub> = 0.0155 |
| Completeness to $\theta = 25.242^\circ$                                             | 99.9 %                                                                         |
| Data / Restraints / Parameters                                                      | 7652/41/498                                                                    |
| Absorption correction<br><i>T</i> <sub>min</sub> / <i>T</i> <sub>max</sub> (method) | 0.9428/1.0000<br>(numerical)                                                   |
| Goodness-of-fit on <i>F</i> <sup>2</sup>                                            | 1.057                                                                          |
| Final <i>R</i> indexes [ <i>I</i> ≥ 2 $\sigma$ ( <i>I</i> )]                        | <i>R</i> <sub>1</sub> = 0.0360<br><i>wR</i> <sub>2</sub> = 0.0951              |
| Final <i>R</i> indexes [all data]                                                   | <i>R</i> <sub>1</sub> = 0.0402<br><i>wR</i> <sub>2</sub> = 0.0995              |
| Largest peak/hole [eÅ <sup>-3</sup> ]                                               | 0.27/-0.16                                                                     |
| Flack <i>X</i> parameter                                                            | 0.04(4)                                                                        |
| Extinction coefficient                                                              | 0.0046(9)                                                                      |

## 7.5. **1g**<sup>o</sup>MeCN

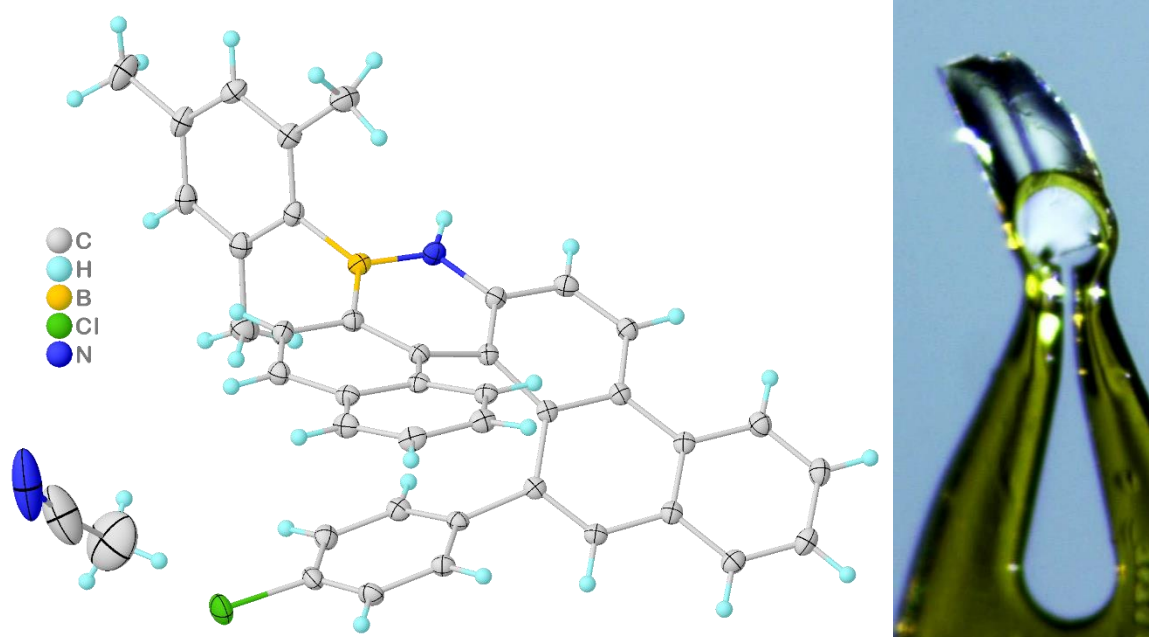

**Figure S43:** Full asymmetric unit of **1g**<sup>o</sup>MeCN. Anisotropic displacement ellipsoids drawn at 50% probability level. Single crystals were obtained from a solution in acetonitrile.

|                                           |                                                                   |
|-------------------------------------------|-------------------------------------------------------------------|
| CCDC number                               | 2506346                                                           |
| Empirical formula                         | C <sub>41</sub> H <sub>32</sub> BClN <sub>2</sub>                 |
| Formula weight                            | 598.94                                                            |
| Temperature [K]                           | 100.00                                                            |
| Crystal system                            | Orthorhombic                                                      |
| Space group (number)                      | <i>P</i> 2 <sub>1</sub> 2 <sub>1</sub> 2 <sub>1</sub> (19)        |
| <i>a</i> [Å]                              | 8.3058(10)                                                        |
| <i>b</i> [Å]                              | 12.2298(10)                                                       |
| <i>c</i> [Å]                              | 31.682(3)                                                         |
| $\alpha$ [°]                              | 90                                                                |
| $\beta$ [°]                               | 90                                                                |
| $\gamma$ [°]                              | 90                                                                |
| Volume [Å <sup>3</sup> ]                  | 3218.2(6)                                                         |
| <i>Z</i>                                  | 4                                                                 |
| $\rho_{\text{calc}}$ [gcm <sup>-3</sup> ] | 1.236                                                             |
| $\mu$ [mm <sup>-1</sup> ]                 | 0.151                                                             |
| <i>F</i> (000)                            | 1256                                                              |
| Crystal size [mm <sup>3</sup> ]           | 0.449×0.302×0.02                                                  |
| Crystal colour                            | Colourless                                                        |
| Crystal shape                             | Plate                                                             |
| Radiation                                 | MoK $\alpha$ ( $\lambda$ =0.71073 Å)                              |
| 2 $\theta$ range [°]                      | 4.21 to 57.43 (0.74 Å)                                            |
| Index ranges                              | -11 ≤ <i>h</i> ≤ 11<br>-16 ≤ <i>k</i> ≤ 13<br>-42 ≤ <i>l</i> ≤ 42 |
| Reflections collected                     | 86758                                                             |

|                                                                                     |                                                                                |
|-------------------------------------------------------------------------------------|--------------------------------------------------------------------------------|
| Independent reflections                                                             | 8317<br><i>R</i> <sub>int</sub> = 0.0493<br><i>R</i> <sub>sigma</sub> = 0.0248 |
| Completeness to $\theta = 25.242^\circ$                                             | 99.9 %                                                                         |
| Data / Restraints / Parameters                                                      | 8317/1/413                                                                     |
| Absorption correction<br><i>T</i> <sub>min</sub> / <i>T</i> <sub>max</sub> (method) | 0.8850/1.0000<br>(numerical)                                                   |
| Goodness-of-fit on <i>F</i> <sup>2</sup>                                            | 1.020                                                                          |
| Final <i>R</i> indexes [ <i>I</i> ≥ 2 $\sigma$ ( <i>I</i> )]                        | <i>R</i> <sub>1</sub> = 0.0384<br><i>wR</i> <sub>2</sub> = 0.0901              |
| Final <i>R</i> indexes [all data]                                                   | <i>R</i> <sub>1</sub> = 0.0440<br><i>wR</i> <sub>2</sub> = 0.0938              |
| Largest peak/hole [eÅ <sup>-3</sup> ]                                               | 0.54/-0.27                                                                     |
| Flack X parameter                                                                   | 0.000(17)                                                                      |

7.6. **1h**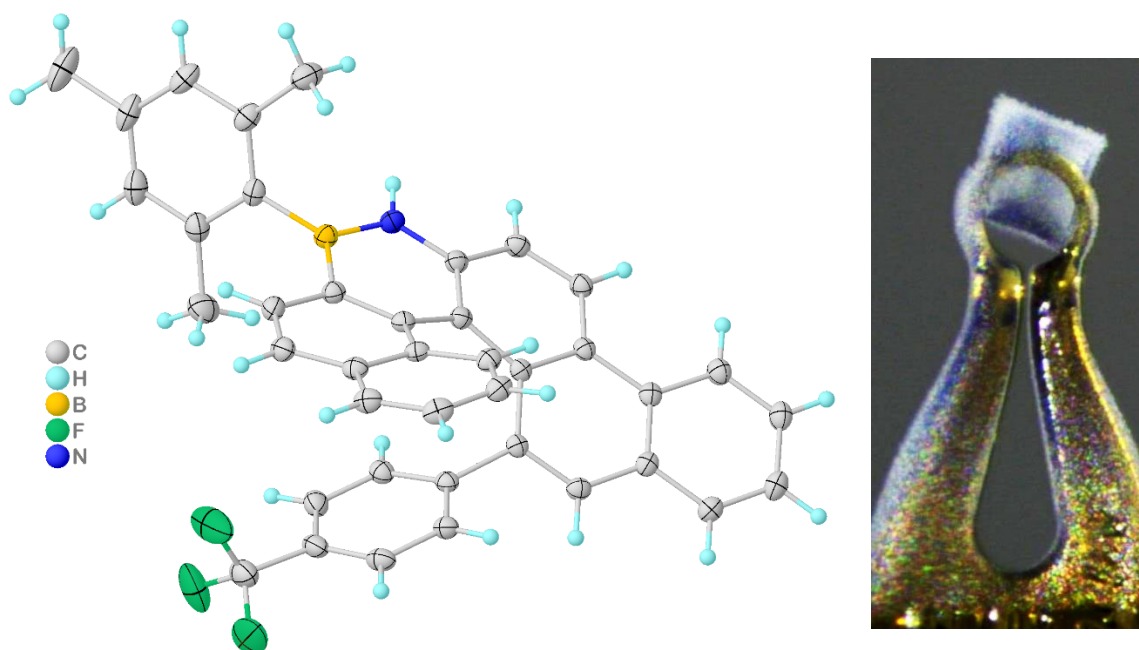

**Figure S44:** Full asymmetric unit of **1h**. Anisotropic displacement ellipsoids drawn at 50% probability level. There appears to be a solvent accessible void triggering an A level alert, but no relevant residual density is there to be found. Solvent mask was used, but it finds only a cavity content of 1 electron in 130 Å<sup>3</sup>. Single crystals were obtained from a solution in dichloromethane.

|                                        |                                                            |                                                                                     |                                                                                |
|----------------------------------------|------------------------------------------------------------|-------------------------------------------------------------------------------------|--------------------------------------------------------------------------------|
| CCDC number                            | 2506347                                                    | Index ranges                                                                        | -10 ≤ h ≤ 9<br>-16 ≤ k ≤ 16<br>-40 ≤ l ≤ 39                                    |
| Empirical formula                      | C <sub>40</sub> H <sub>29</sub> BF <sub>3</sub> N          | Reflections collected                                                               | 96476                                                                          |
| Formula weight                         | 591.45                                                     | Independent reflections                                                             | 7084<br><i>R</i> <sub>int</sub> = 0.0615<br><i>R</i> <sub>sigma</sub> = 0.0229 |
| Temperature [K]                        | 100.00                                                     | Completeness to<br>θ = 67.679°                                                      | 99.9 %                                                                         |
| Crystal system                         | Orthorhombic                                               | Data / Restraints /<br>Parameters                                                   | 7084 / 0 / 410                                                                 |
| Space group (number)                   | <i>P</i> 2 <sub>1</sub> 2 <sub>1</sub> 2 <sub>1</sub> (19) | Absorption correction<br><i>T</i> <sub>min</sub> / <i>T</i> <sub>max</sub> (method) | 0.7737 / 1.0000<br>(numerical)                                                 |
| <i>a</i> [Å]                           | 8.2373(5)                                                  | Goodness-of-fit on <i>F</i> <sup>2</sup>                                            | 1.033                                                                          |
| <i>b</i> [Å]                           | 12.6200(8)                                                 | Final <i>R</i> indexes<br>[ <i>I</i> ≥ 2σ( <i>I</i> )]                              | <i>R</i> <sub>1</sub> = 0.0314<br><i>wR</i> <sub>2</sub> = 0.0828              |
| <i>c</i> [Å]                           | 31.678(2)                                                  | Final <i>R</i> indexes<br>[all data]                                                | <i>R</i> <sub>1</sub> = 0.0330<br><i>wR</i> <sub>2</sub> = 0.0843              |
| α [°]                                  | 90                                                         | Largest peak/hole<br>[eÅ <sup>-3</sup> ]                                            | 0.27/-0.28                                                                     |
| β [°]                                  | 90                                                         | Extinction coefficient                                                              | 0.0019(2)                                                                      |
| γ [°]                                  | 90                                                         | Flack X parameter                                                                   | 0.01(4)                                                                        |
| Volume [Å <sup>3</sup> ]               | 3293.1(4)                                                  |                                                                                     |                                                                                |
| <i>Z</i>                               | 4                                                          |                                                                                     |                                                                                |
| ρ <sub>calc</sub> [gcm <sup>-3</sup> ] | 1.193                                                      |                                                                                     |                                                                                |
| μ [mm <sup>-1</sup> ]                  | 0.647                                                      |                                                                                     |                                                                                |
| <i>F</i> (000)                         | 1232                                                       |                                                                                     |                                                                                |
| Crystal size [mm <sup>3</sup> ]        | 0.04×0.245×0.256                                           |                                                                                     |                                                                                |
| Crystal colour                         | Colourless                                                 |                                                                                     |                                                                                |
| Crystal shape                          | Plate                                                      |                                                                                     |                                                                                |
| Radiation                              | CuK <sub>α</sub> (λ=1.54178 Å)                             |                                                                                     |                                                                                |
| 2θ range [°]                           | 7.54 to 158.15 (0.79 Å)                                    |                                                                                     |                                                                                |

## 7.7.4

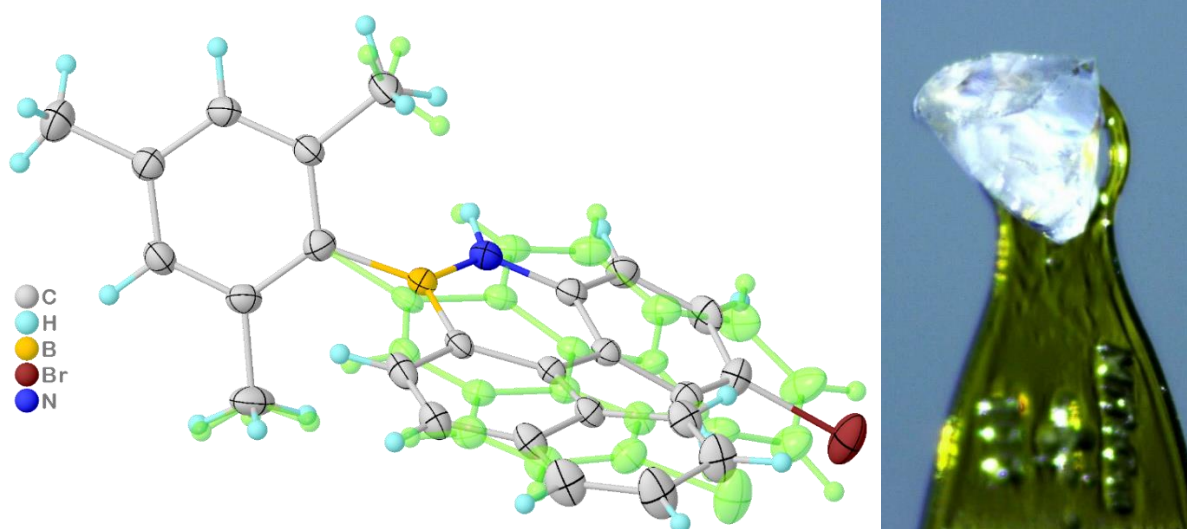

**Figure S45:** Full asymmetric unit of **4**. Anisotropic displacement ellipsoids drawn at 50% probability level; disordered molecule parts in PART 2 drawn in green hue. The BN-tetrahelix moiety exhibits local pseudosymmetry, with both disorder parts having an occupancy of 50%. Single crystals were obtained from a solution in dichloromethane.

|                                           |                                                                  |
|-------------------------------------------|------------------------------------------------------------------|
| CCDC number                               | 2506348                                                          |
| Empirical formula                         | C <sub>25</sub> H <sub>21</sub> BBrN                             |
| Formula weight                            | 426.15                                                           |
| Temperature [K]                           | 100.00                                                           |
| Crystal system                            | Tetragonal                                                       |
| Space group (number)                      | <i>P</i> 4 <sub>3</sub> (78)                                     |
| <i>a</i> [Å]                              | 10.2945(4)                                                       |
| <i>b</i> [Å]                              | 10.2945(4)                                                       |
| <i>c</i> [Å]                              | 18.5686(12)                                                      |
| $\alpha$ [°]                              | 90                                                               |
| $\beta$ [°]                               | 90                                                               |
| $\gamma$ [°]                              | 90                                                               |
| Volume [Å <sup>3</sup> ]                  | 1967.8(2)                                                        |
| <i>Z</i>                                  | 4                                                                |
| $\rho_{\text{calc}}$ [gcm <sup>-3</sup> ] | 1.438                                                            |
| $\mu$ [mm <sup>-1</sup> ]                 | 2.099                                                            |
| <i>F</i> (000)                            | 872                                                              |
| Crystal size [mm <sup>3</sup> ]           | 0.443×0.43×0.42                                                  |
| Crystal colour                            | Colourless                                                       |
| Crystal shape                             | Block                                                            |
| Radiation                                 | MoK $\alpha$ ( $\lambda$ =0.71073 Å)                             |
| 2 $\theta$ range [°]                      | 3.96 to 63.23 (0.68 Å)                                           |
| Index ranges                              | -14 ≤ <i>h</i> ≤ 15<br>-15 ≤ <i>k</i> ≤ 9<br>-27 ≤ <i>l</i> ≤ 27 |

|                                                                   |                                                                  |
|-------------------------------------------------------------------|------------------------------------------------------------------|
| Reflections collected                                             | 43027                                                            |
| Independent reflections                                           | 6505<br>$R_{\text{int}} = 0.0557$<br>$R_{\text{sigma}} = 0.0292$ |
| Completeness to $\theta = 25.242^\circ$                           | 99.8 %                                                           |
| Data / Restraints / Parameters                                    | 6505/1/430                                                       |
| Absorption correction<br>$T_{\text{min}}/T_{\text{max}}$ (method) | 0.4858/0.6534<br>(numerical)                                     |
| Goodness-of-fit on $F^2$                                          | 1.043                                                            |
| Final <i>R</i> indexes [ $I \geq 2\sigma(I)$ ]                    | $R_1 = 0.0375$<br>$wR_2 = 0.0870$                                |
| Final <i>R</i> indexes [all data]                                 | $R_1 = 0.0421$<br>$wR_2 = 0.0888$                                |
| Largest peak/hole [eÅ <sup>-3</sup> ]                             | 0.24/-0.33                                                       |
| Flack X parameter                                                 | 0.001(6)                                                         |
| Extinction coefficient                                            | 0.0048(14)                                                       |

## 7.8. S4(NMe)

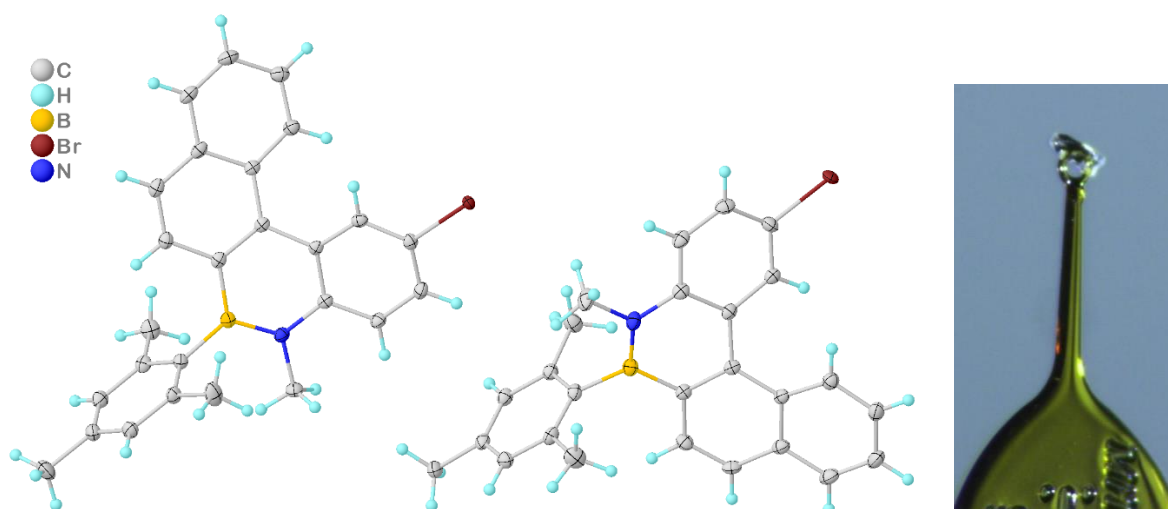

**Figure S46:** Full asymmetric unit of **S4(NMe)** ( $Z'=2$ ). Anisotropic displacement ellipsoids drawn at 50% probability level. Single crystals were obtained from a solution in dichloromethane.

|                                           |                                     |
|-------------------------------------------|-------------------------------------|
| CCDC number                               | 2506358                             |
| Empirical formula                         | $C_{26}H_{23}BBrN$                  |
| Formula weight                            | 440.17                              |
| Temperature [K]                           | 100.00                              |
| Crystal system                            | Monoclinic                          |
| Space group (number)                      | $P2_1/c$ (14)                       |
| $a$ [Å]                                   | 16.0992(19)                         |
| $b$ [Å]                                   | 15.892(3)                           |
| $c$ [Å]                                   | 16.165(3)                           |
| $\alpha$ [°]                              | 90                                  |
| $\beta$ [°]                               | 92.065(5)                           |
| $\gamma$ [°]                              | 90                                  |
| Volume [Å <sup>3</sup> ]                  | 4133.3(12)                          |
| $Z$                                       | 8                                   |
| $\rho_{\text{calc}}$ [gcm <sup>-3</sup> ] | 1.415                               |
| $\mu$ [mm <sup>-1</sup> ]                 | 2.001                               |
| $F(000)$                                  | 1808                                |
| Crystal size [mm <sup>3</sup> ]           | 0.162×0.093×0.059                   |
| Crystal colour                            | Colourless                          |
| Crystal shape                             | Needle                              |
| Radiation                                 | MoK $\alpha$ ( $\lambda=0.71073$ Å) |
| 2 $\theta$ range [°]                      | 4.34 to 61.10 (0.70 Å)              |

|                                                                   |                                                                      |
|-------------------------------------------------------------------|----------------------------------------------------------------------|
| Index ranges                                                      | $-23 \leq h \leq 19$<br>$-22 \leq k \leq 22$<br>$-23 \leq l \leq 23$ |
| Reflections collected                                             | 91001                                                                |
| Independent reflections                                           | 12614<br>$R_{\text{int}} = 0.0553$<br>$R_{\text{sigma}} = 0.0381$    |
| Completeness to $\theta = 25.242^\circ$                           | 99.9 %                                                               |
| Data / Restraints / Parameters                                    | 12614/0/531                                                          |
| Absorption correction<br>$T_{\text{min}}/T_{\text{max}}$ (method) | 0.8030/0.9243<br>(numerical)                                         |
| Goodness-of-fit on $F^2$                                          | 1.113                                                                |
| Final $R$ indexes [ $I \geq 2\sigma(I)$ ]                         | $R_1 = 0.0439$<br>$wR_2 = 0.0935$                                    |
| Final $R$ indexes [all data]                                      | $R_1 = 0.0601$<br>$wR_2 = 0.1007$                                    |
| Largest peak/hole [eÅ <sup>-3</sup> ]                             | 1.04/−0.88                                                           |

## 7.9.S4(BPh)

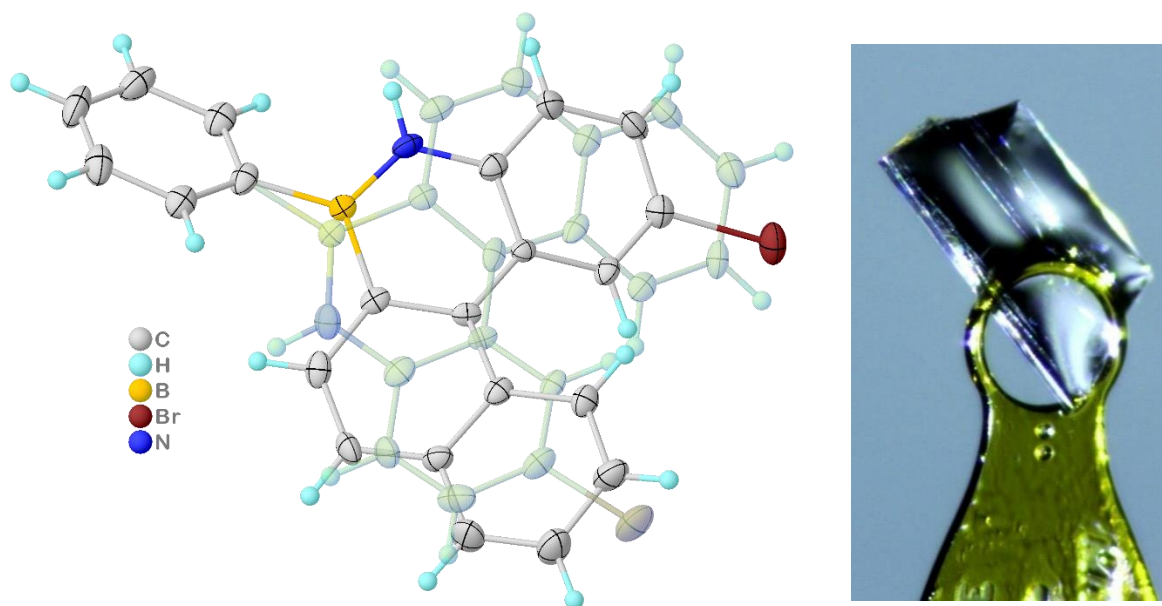

**Figure S47:** Full asymmetric unit of **S4(BPh)**. Anisotropic displacement ellipsoids drawn at 50% probability level; disordered molecule parts in PART 2 drawn in green hue. The BN-tetrahelix moiety exhibits local pseudosymmetry, with both disorder parts having an occupancy of approximately 50%. Non-merohedral twinning was found, with both domains related by  $(0.494\ 0\ 0.514\ /\ 0\ -1\ 0\ /\ 1.472\ 0\ -0.494)$  which corresponds to a rotation of  $180^\circ$ ; final refinement was carried out against  $hklf5$  data, with a refined batch scale factor of  $0.3977(14)$ . Crystals were obtained from a mixture of dichloromethane and hexane.

|                                           |                                           |
|-------------------------------------------|-------------------------------------------|
| CCDC number                               | 2506357                                   |
| Empirical formula                         | $C_{22}H_{15}BBrN$                        |
| Formula weight                            | 384.07                                    |
| Temperature [K]                           | 100.00                                    |
| Crystal system                            | Monoclinic                                |
| Space group (number)                      | $P2_1/n$ (14)                             |
| $a$ [Å]                                   | 11.2579(11)                               |
| $b$ [Å]                                   | 7.1245(6)                                 |
| $c$ [Å]                                   | 21.2105(18)                               |
| $\alpha$ [°]                              | 90                                        |
| $\beta$ [°]                               | 100.818(4)                                |
| $\gamma$ [°]                              | 90                                        |
| Volume [Å <sup>3</sup> ]                  | 1671.0(3)                                 |
| $Z$                                       | 4                                         |
| $\rho_{\text{calc}}$ [gcm <sup>-3</sup> ] | 1.527                                     |
| $\mu$ [mm <sup>-1</sup> ]                 | 2.463                                     |
| $F(000)$                                  | 776                                       |
| Crystal size [mm <sup>3</sup> ]           | $0.777 \times 0.364 \times 0.064$         |
| Crystal colour                            | Colourless                                |
| Crystal shape                             | Plate                                     |
| Radiation                                 | $\text{MoK}\alpha$ ( $\lambda=0.71073$ Å) |
| $2\theta$ range [°]                       | 3.91 to 56.57 (0.75 Å)                    |

|                                                                   |                                                                  |
|-------------------------------------------------------------------|------------------------------------------------------------------|
| Index ranges                                                      | $-15 \leq h \leq 14$<br>$0 \leq k \leq 9$<br>$0 \leq l \leq 28$  |
| Reflections collected                                             | 4149                                                             |
| Independent reflections                                           | 4149<br>$R_{\text{int}} = 0.0463$<br>$R_{\text{sigma}} = 0.0327$ |
| Completeness to $\theta = 25.242^\circ$                           | 100.0 %                                                          |
| Data / Restraints / Parameters                                    | 4149/300/399                                                     |
| Absorption correction<br>$T_{\text{min}}/T_{\text{max}}$ (method) | 0.143251/0.209190<br>(multi-scan)                                |
| Goodness-of-fit on $F^2$                                          | 1.104                                                            |
| Final $R$ indexes [ $I \geq 2\sigma(I)$ ]                         | $R_1 = 0.0398$<br>$wR_2 = 0.0926$                                |
| Final $R$ indexes [all data]                                      | $R_1 = 0.0564$<br>$wR_2 = 0.1013$                                |
| Largest peak/hole [eÅ <sup>-3</sup> ]                             | 0.42/-0.32                                                       |

## 7.10. 5a

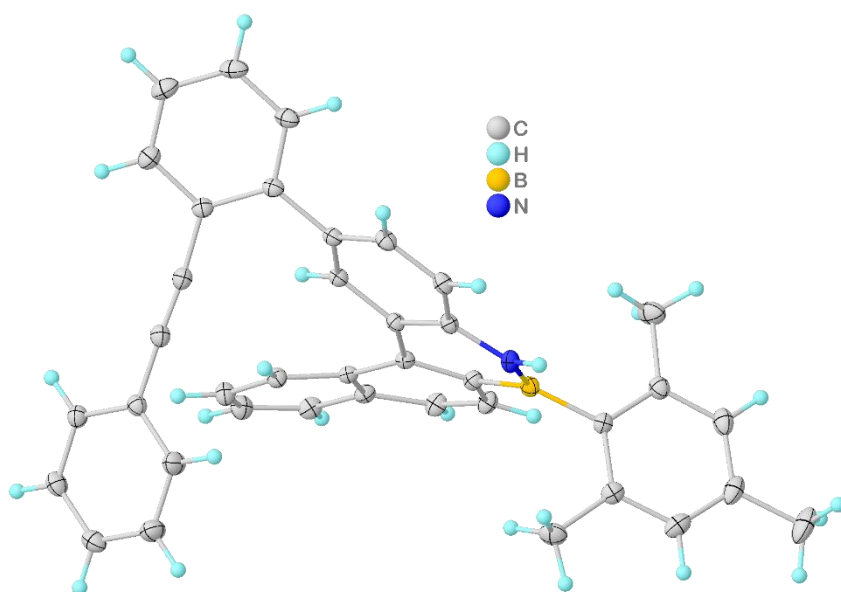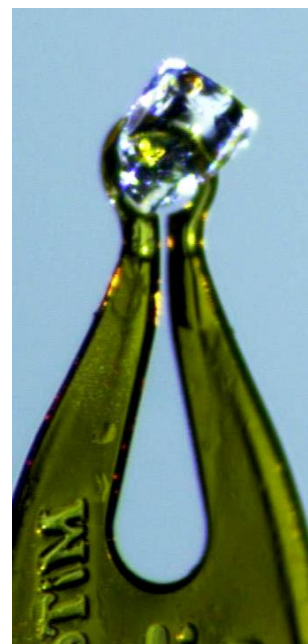

**Figure S48:** Full asymmetric unit of **5a**. Anisotropic displacement ellipsoids drawn at 50% probability level. Single crystals were obtained from a solution in acetonitrile.

|                                           |                                     |
|-------------------------------------------|-------------------------------------|
| CCDC number                               | 2506349                             |
| Empirical formula                         | C <sub>39</sub> H <sub>30</sub> BN  |
| Formula weight                            | 523.45                              |
| Temperature [K]                           | 100.00                              |
| Crystal system                            | Trigonal                            |
| Space group (number)                      | $R\bar{3}:H$ (148)                  |
| <i>a</i> [Å]                              | 37.971(2)                           |
| <i>b</i> [Å]                              | 37.971(2)                           |
| <i>c</i> [Å]                              | 10.0812(7)                          |
| $\alpha$ [°]                              | 90                                  |
| $\beta$ [°]                               | 90                                  |
| $\gamma$ [°]                              | 120                                 |
| Volume [Å <sup>3</sup> ]                  | 12587.4(16)                         |
| <i>Z</i>                                  | 18                                  |
| $\rho_{\text{calc}}$ [gcm <sup>-3</sup> ] | 1.243                               |
| $\mu$ [mm <sup>-1</sup> ]                 | 0.071                               |
| <i>F</i> (000)                            | 4968                                |
| Crystal size [mm <sup>3</sup> ]           | 0.301×0.181×0.12                    |
| Crystal colour                            | Colourless                          |
| Crystal shape                             | Block                               |
| Radiation                                 | MoK $\alpha$ ( $\lambda=0.71073$ Å) |
| 2 $\theta$ range [°]                      | 4.23 to 61.02 (0.70 Å)              |

|                                                                   |                                                                   |
|-------------------------------------------------------------------|-------------------------------------------------------------------|
| Index ranges                                                      | -54 ≤ <i>h</i> ≤ 54<br>-54 ≤ <i>k</i> ≤ 54<br>-14 ≤ <i>l</i> ≤ 14 |
| Reflections collected                                             | 119699                                                            |
| Independent reflections                                           | 8555<br>$R_{\text{int}} = 0.0363$<br>$R_{\text{sigma}} = 0.0154$  |
| Completeness to $\theta = 25.242^\circ$                           | 100.0 %                                                           |
| Data / Restraints / Parameters                                    | 8555/1/377                                                        |
| Absorption correction<br>$T_{\text{min}}/T_{\text{max}}$ (method) | 0.9705/0.9952<br>(numerical)                                      |
| Goodness-of-fit on $F^2$                                          | 1.023                                                             |
| Final <i>R</i> indexes [ $I \geq 2\sigma(I)$ ]                    | $R_1 = 0.0424$<br>$wR_2 = 0.1099$                                 |
| Final <i>R</i> indexes [all data]                                 | $R_1 = 0.0493$<br>$wR_2 = 0.1158$                                 |
| Largest peak/hole [eÅ <sup>-3</sup> ]                             | 0.45/-0.22                                                        |

7.11. **5c**·HCCl<sub>3</sub>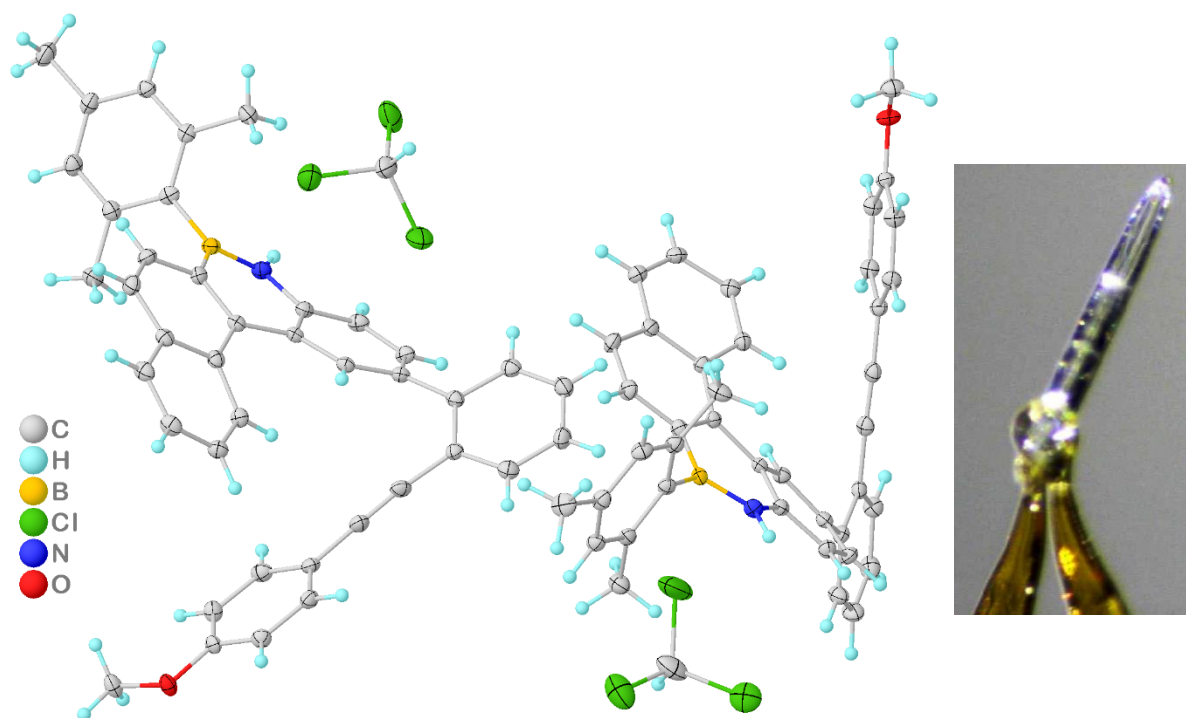

**Figure S49:** Full asymmetric unit of **5c**·HCCl<sub>3</sub> ( $Z'=2$ ). Anisotropic displacement ellipsoids drawn at 50% probability level. Single crystals were obtained from a solution in chloroform.

|                                           |                                                                   |
|-------------------------------------------|-------------------------------------------------------------------|
| CCDC number                               | 2506350                                                           |
| Empirical formula                         | C <sub>41</sub> H <sub>33</sub> BCl <sub>3</sub> NO               |
| Formula weight                            | 672.84                                                            |
| Temperature [K]                           | 100.00                                                            |
| Crystal system                            | Orthorhombic                                                      |
| Space group (number)                      | <i>Pca</i> 2 <sub>1</sub> (29)                                    |
| <i>a</i> [Å]                              | 13.0664(5)                                                        |
| <i>b</i> [Å]                              | 27.9409(12)                                                       |
| <i>c</i> [Å]                              | 18.5017(8)                                                        |
| $\alpha$ [°]                              | 90                                                                |
| $\beta$ [°]                               | 90                                                                |
| $\gamma$ [°]                              | 90                                                                |
| Volume [Å <sup>3</sup> ]                  | 6754.7(5)                                                         |
| <i>Z</i>                                  | 8                                                                 |
| $\rho_{\text{calc}}$ [gcm <sup>-3</sup> ] | 1.323                                                             |
| $\mu$ [mm <sup>-1</sup> ]                 | 0.306                                                             |
| <i>F</i> (000)                            | 2800                                                              |
| Crystal size [mm <sup>3</sup> ]           | 1.292×0.054×0.05                                                  |
| Crystal colour                            | Colourless                                                        |
| Crystal shape                             | Needle                                                            |
| Radiation                                 | MoK $\alpha$ ( $\lambda=0.71073$ Å)                               |
| 2 $\theta$ range [°]                      | 4.09 to 55.02 (0.77 Å)                                            |
| Index ranges                              | -16 ≤ <i>h</i> ≤ 16<br>-36 ≤ <i>k</i> ≤ 36<br>-24 ≤ <i>l</i> ≤ 24 |

|                                                                   |                                                                   |
|-------------------------------------------------------------------|-------------------------------------------------------------------|
| Reflections collected                                             | 231402                                                            |
| Independent reflections                                           | 15511<br>$R_{\text{int}} = 0.1086$<br>$R_{\text{sigma}} = 0.0462$ |
| Completeness to $\theta = 25.242^\circ$                           | 100.0 %                                                           |
| Data / Restraints / Parameters                                    | 15511/3/863                                                       |
| Absorption correction<br>$T_{\text{min}}/T_{\text{max}}$ (method) | 0.7924/1.0000<br>(numerical)                                      |
| Goodness-of-fit on $F^2$                                          | 1.074                                                             |
| Final <i>R</i> indexes [ $I \geq 2\sigma(I)$ ]                    | $R_1 = 0.0466$<br>$wR_2 = 0.1092$                                 |
| Final <i>R</i> indexes [all data]                                 | $R_1 = 0.0650$<br>$wR_2 = 0.1189$                                 |
| Largest peak/hole [eÅ <sup>-3</sup> ]                             | 0.63/-0.55                                                        |
| Flack X parameter                                                 | 0.44(6)                                                           |
| Extinction coefficient                                            | 0.0019(2)                                                         |

7.12. **7h**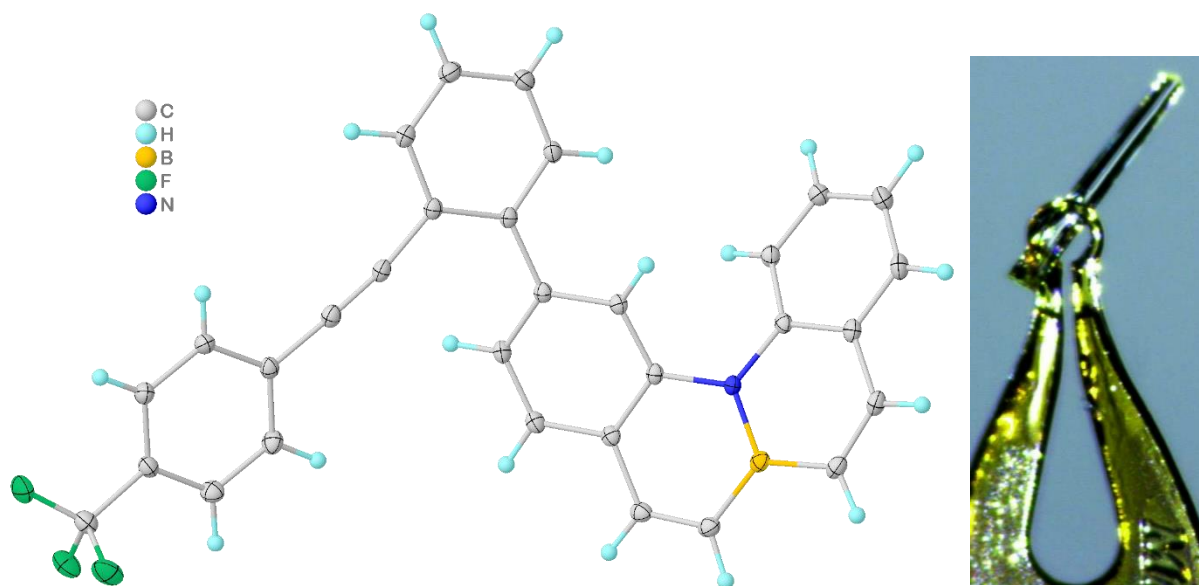

**Figure S50:** Full asymmetric unit of **7h**. Anisotropic displacement ellipsoids drawn at 50% probability level. Single crystals were obtained from a solution in dichloromethane.

|                                           |                                                   |                                           |                                                                  |
|-------------------------------------------|---------------------------------------------------|-------------------------------------------|------------------------------------------------------------------|
| CCDC number                               | 2506351                                           | 2 $\theta$ range [°]                      | 3.83 to 61.04 (0.70 Å)                                           |
| Empirical formula                         | C <sub>31</sub> H <sub>19</sub> BF <sub>3</sub> N | Index ranges                              | -30 ≤ h ≤ 30<br>-20 ≤ k ≤ 19<br>-9 ≤ l ≤ 10                      |
| Formula weight                            | 473.28                                            | Reflections collected                     | 78638                                                            |
| Temperature [K]                           | 100.00                                            | Independent reflections                   | 6887<br>$R_{\text{int}} = 0.0448$<br>$R_{\text{sigma}} = 0.0207$ |
| Crystal system                            | Monoclinic                                        | Completeness to $\theta = 25.242^\circ$   | 100.0 %                                                          |
| Space group (number)                      | $P2_1/c$ (14)                                     | Data / Restraints / Parameters            | 6887 / 0 / 401                                                   |
| $a$ [Å]                                   | 21.3134(10)                                       | Absorption correction                     | 0.7121 / 0.7461<br>(numerical)                                   |
| $b$ [Å]                                   | 14.1947(6)                                        | $T_{\text{min}}/T_{\text{max}}$ (method)  |                                                                  |
| $c$ [Å]                                   | 7.4674(3)                                         | Goodness-of-fit on $F^2$                  | 1.042                                                            |
| $\alpha$ [°]                              | 90                                                | Final $R$ indexes [ $I \geq 2\sigma(I)$ ] | $R_1 = 0.0400$<br>$wR_2 = 0.1005$                                |
| $\beta$ [°]                               | 94.591(2)                                         | Final $R$ indexes [all data]              | $R_1 = 0.0505$<br>$wR_2 = 0.1087$                                |
| $\gamma$ [°]                              | 90                                                | Largest peak/hole [eÅ <sup>-3</sup> ]     | 0.43/-0.29                                                       |
| Volume [Å <sup>3</sup> ]                  | 2251.92(17)                                       |                                           |                                                                  |
| $Z$                                       | 4                                                 |                                           |                                                                  |
| $\rho_{\text{calc}}$ [gcm <sup>-3</sup> ] | 1.396                                             |                                           |                                                                  |
| $\mu$ [mm <sup>-1</sup> ]                 | 0.098                                             |                                           |                                                                  |
| $F(000)$                                  | 976                                               |                                           |                                                                  |
| Crystal size [mm <sup>3</sup> ]           | 0.053×0.067×0.649                                 |                                           |                                                                  |
| Crystal colour                            | Colourless                                        |                                           |                                                                  |
| Crystal shape                             | Needle                                            |                                           |                                                                  |
| Radiation                                 | MoK $\alpha$ ( $\lambda=0.71073$ Å)               |                                           |                                                                  |

7.13. **S10b(NMe)·0.5CH<sub>2</sub>Cl<sub>2</sub>**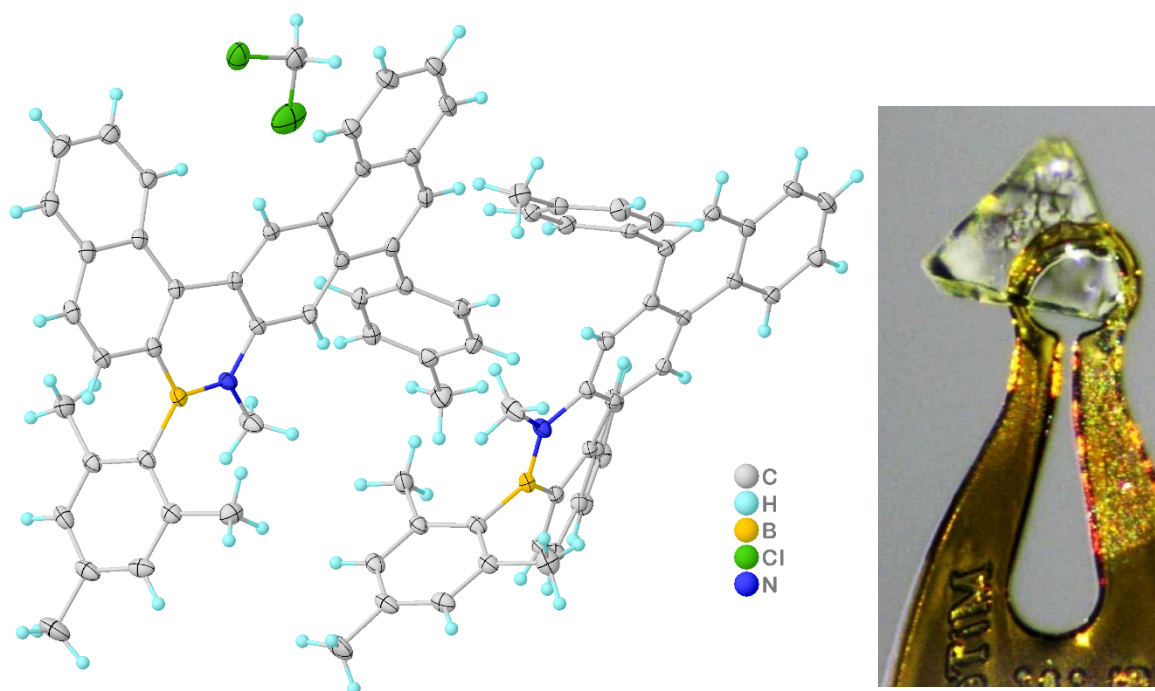

**Figure S51:** Full asymmetric unit of **S10b(NMe)·0.5CH<sub>2</sub>Cl<sub>2</sub>** ( $Z' = 2$ ). Anisotropic displacement ellipsoids drawn at 50% probability level. Non-merohedral twinning was found, with both domains related by  $(-1\ 0\ 0.008 / 0\ -1\ 0 / 0.097\ 0\ 1)$  which corresponds to a rotation of  $180^\circ$ ; final refinement was carried out against hklf5 data, with a refined batch scale factor of 0.4314(7). Crystals were obtained from a solution in dichloromethane.

|                                           |                                                                               |
|-------------------------------------------|-------------------------------------------------------------------------------|
| CCDC number                               | 2506352                                                                       |
| Empirical formula                         | C <sub>83</sub> H <sub>70</sub> B <sub>2</sub> Cl <sub>2</sub> N <sub>2</sub> |
| Formula weight                            | 1187.93                                                                       |
| Temperature [K]                           | 100.00                                                                        |
| Crystal system                            | Monoclinic                                                                    |
| Space group (number)                      | $P2_1/n$ (14)                                                                 |
| $a$ [Å]                                   | 20.1693(7)                                                                    |
| $b$ [Å]                                   | 12.1225(4)                                                                    |
| $c$ [Å]                                   | 25.9034(8)                                                                    |
| $\alpha$ [°]                              | 90                                                                            |
| $\beta$ [°]                               | 91.8780(10)                                                                   |
| $\gamma$ [°]                              | 90                                                                            |
| Volume [Å <sup>3</sup> ]                  | 6330.0(4)                                                                     |
| $Z$                                       | 4                                                                             |
| $\rho_{\text{calc}}$ [gcm <sup>-3</sup> ] | 1.246                                                                         |
| $\mu$ [mm <sup>-1</sup> ]                 | 0.152                                                                         |
| $F(000)$                                  | 2504                                                                          |
| Crystal size [mm <sup>3</sup> ]           | 0.395×0.386×0.06                                                              |
| Crystal colour                            | Colourless                                                                    |
| Crystal shape                             | Plate                                                                         |
| Radiation                                 | MoK $\alpha$ ( $\lambda=0.71073$ Å)                                           |
| $2\theta$ range [°]                       | 3.71 to 54.38 (0.78 Å)                                                        |

|                                                                   |                                                                   |
|-------------------------------------------------------------------|-------------------------------------------------------------------|
| Index ranges                                                      | $-25 \leq h \leq 25$<br>$0 \leq k \leq 15$<br>$0 \leq l \leq 33$  |
| Reflections collected                                             | 14435                                                             |
| Independent reflections                                           | 14435<br>$R_{\text{int}} = 0.0625$<br>$R_{\text{sigma}} = 0.0275$ |
| Completeness to $\theta = 25.242^\circ$                           | 99.9 %                                                            |
| Data / Restraints / Parameters                                    | 14435/0/813                                                       |
| Absorption correction<br>$T_{\text{min}}/T_{\text{max}}$ (method) | 0.562570/0.801361<br>(multi-scan)                                 |
| Goodness-of-fit on $F^2$                                          | 1.029                                                             |
| Final $R$ indexes [ $I \geq 2\sigma(I)$ ]                         | $R_1 = 0.0419$<br>$wR_2 = 0.0974$                                 |
| Final $R$ indexes [all data]                                      | $R_1 = 0.0492$<br>$wR_2 = 0.1023$                                 |
| Largest peak/hole [eÅ <sup>-3</sup> ]                             | 0.49/-0.68                                                        |

7.14. **11b**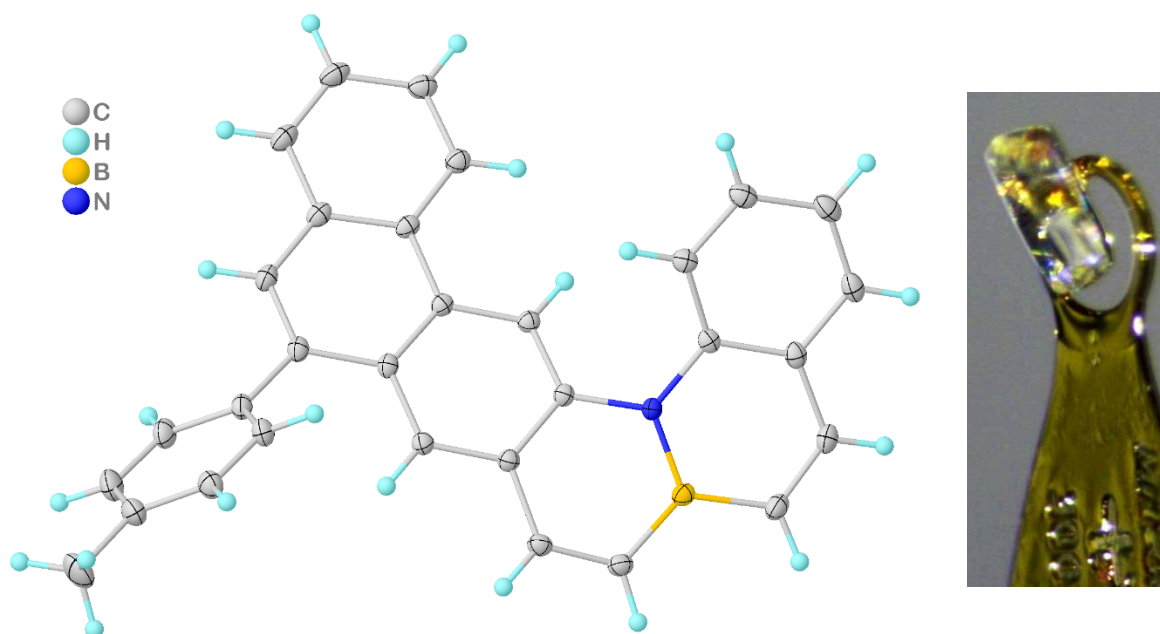

**Figure S52:** Full asymmetric unit of **11b**. Anisotropic displacement ellipsoids drawn at 50% probability level. Single crystals were obtained from a mixture of dichloromethane and methanol.

|                                           |                                     |                                           |                                                                      |
|-------------------------------------------|-------------------------------------|-------------------------------------------|----------------------------------------------------------------------|
| CCDC number                               | 2506353                             | Index ranges                              | $-28 \leq h \leq 28$<br>$-28 \leq k \leq 28$<br>$-13 \leq l \leq 13$ |
| Empirical formula                         | C <sub>31</sub> H <sub>22</sub> BN  | Reflections collected                     | 119816                                                               |
| Formula weight                            | 419.30                              | Independent reflections                   | 6627<br>$R_{\text{int}} = 0.0423$<br>$R_{\text{sigma}} = 0.0138$     |
| Temperature [K]                           | 100.00                              | Completeness to $\theta = 25.242^\circ$   | 99.9 %                                                               |
| Crystal system                            | Hexagonal                           | Data / Restraints / Parameters            | 6627 / 1 / 299                                                       |
| Space group (number)                      | $P6_2$ (171)                        | Absorption correction                     | 0.8221 / 1.0000<br>(numerical)                                       |
| $a$ [Å]                                   | 20.0698(9)                          | Goodness-of-fit on $F^2$                  | 1.023                                                                |
| $b$ [Å]                                   | 20.0698(9)                          | Final $R$ indexes [ $I \geq 2\sigma(I)$ ] | $R_1 = 0.0364$<br>$wR_2 = 0.1022$                                    |
| $c$ [Å]                                   | 9.2934(5)                           | Final $R$ indexes [all data]              | $R_1 = 0.0373$<br>$wR_2 = 0.1033$                                    |
| $\alpha$ [°]                              | 90                                  | Largest peak/hole [ $e\text{Å}^{-3}$ ]    | 0.35/-0.17                                                           |
| $\beta$ [°]                               | 90                                  | Flack X parameter                         | -0.9(10)                                                             |
| $\gamma$ [°]                              | 120                                 |                                           |                                                                      |
| Volume [Å <sup>3</sup> ]                  | 3241.8(3)                           |                                           |                                                                      |
| $Z$                                       | 6                                   |                                           |                                                                      |
| $\rho_{\text{calc}}$ [gcm <sup>-3</sup> ] | 1.289                               |                                           |                                                                      |
| $\mu$ [mm <sup>-1</sup> ]                 | 0.073                               |                                           |                                                                      |
| $F(000)$                                  | 1320                                |                                           |                                                                      |
| Crystal size [mm <sup>3</sup> ]           | 0.16×0.181×0.441                    |                                           |                                                                      |
| Crystal colour                            | Colourless                          |                                           |                                                                      |
| Crystal shape                             | Block                               |                                           |                                                                      |
| Radiation                                 | MoK $\alpha$ ( $\lambda=0.71073$ Å) |                                           |                                                                      |
| 2 $\theta$ range [°]                      | 4.06 to 61.15 (0.70 Å)              |                                           |                                                                      |

## 7.15. 12b

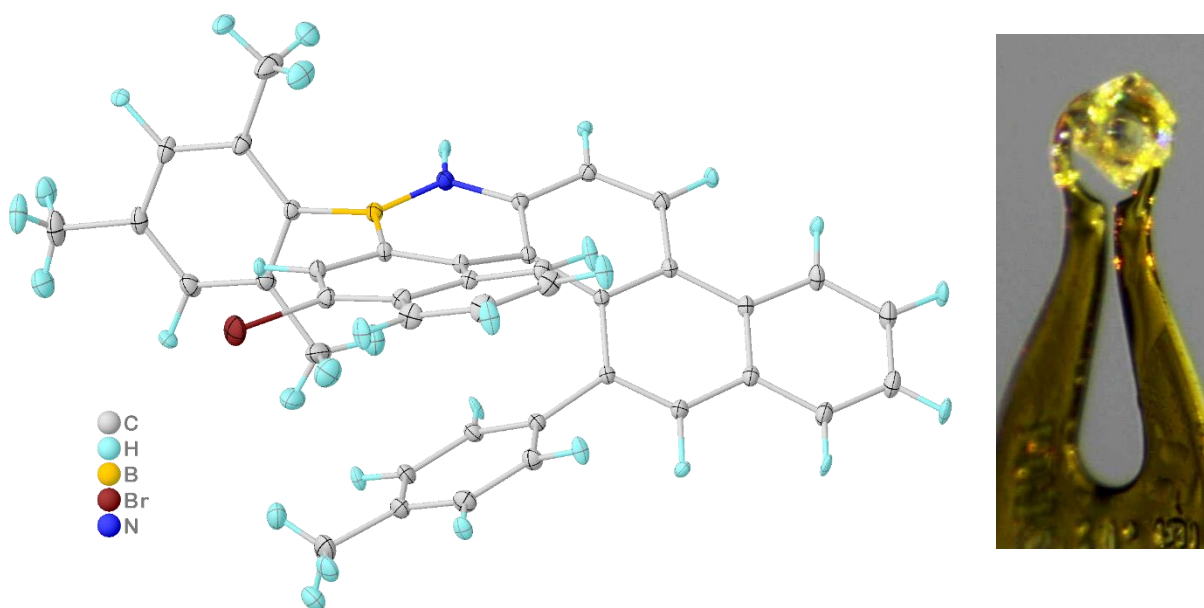

**Figure S53:** Full asymmetric unit of **12b**. Anisotropic displacement ellipsoids drawn at 50% probability level. Aspherical atomic form factors were used within the frameworks of NoSpherA2 implementation of HAR in OLEX<sup>2</sup> using the R<sup>2</sup>SCAN method and x2c-TZVP basis set.<sup>[19]</sup> Single crystals were obtained from a mixture of dichloromethane and acetonitrile by solvent vapor diffusion method.

|                                           |                                      |                                           |                                                                   |
|-------------------------------------------|--------------------------------------|-------------------------------------------|-------------------------------------------------------------------|
| CCDC number                               | 2506354                              | 2 $\theta$ range [°]                      | 4.90 to 72.74 (0.60 Å)                                            |
| Empirical formula                         | C <sub>40</sub> H <sub>31</sub> BBrN | Index ranges                              | -13 ≤ h ≤ 13<br>-19 ≤ k ≤ 22<br>-23 ≤ l ≤ 23                      |
| Formula weight                            | 616.426                              | Reflections collected                     | 123822                                                            |
| Temperature [K]                           | 100.00                               | Independent reflections                   | 13713<br>$R_{\text{int}} = 0.0445$<br>$R_{\text{sigma}} = 0.0268$ |
| Crystal system                            | Triclinic                            | Completeness to $\theta = 25.2417^\circ$  | 99.9 %                                                            |
| Space group (number)                      | $P\bar{1}$ (2)                       | Data / Restraints / Parameters            | 13713 / 657 / 667                                                 |
| $a$ [Å]                                   | 8.4889(5)                            | Absorption correction                     | 0.7468 / 0.9807<br>(numerical)                                    |
| $b$ [Å]                                   | 13.7216(8)                           | $T_{\text{min}}/T_{\text{max}}$ (method)  |                                                                   |
| $c$ [Å]                                   | 14.3661(9)                           | Goodness-of-fit on $F^2$                  | 1.0477                                                            |
| $\alpha$ [°]                              | 116.387(2)                           | Final $R$ indexes [ $I \geq 2\sigma(I)$ ] | $R_1 = 0.0302$<br>$wR_2 = 0.0774$                                 |
| $\beta$ [°]                               | 94.687(2)                            | Final $R$ indexes [all data]              | $R_1 = 0.0380$<br>$wR_2 = 0.0804$                                 |
| $\gamma$ [°]                              | 97.658(2)                            | Largest peak/hole [eÅ <sup>-3</sup> ]     | 1.34/-0.98                                                        |
| Volume [Å <sup>3</sup> ]                  | 1466.83(16)                          |                                           |                                                                   |
| $Z$                                       | 2                                    |                                           |                                                                   |
| $\rho_{\text{calc}}$ [gcm <sup>-3</sup> ] | 1.396                                |                                           |                                                                   |
| $\mu$ [mm <sup>-1</sup> ]                 | 1.432                                |                                           |                                                                   |
| $F(000)$                                  | 635.913                              |                                           |                                                                   |
| Crystal size [mm <sup>3</sup> ]           | 0.149×0.199×0.202                    |                                           |                                                                   |
| Crystal colour                            | Yellow                               |                                           |                                                                   |
| Crystal shape                             | Block                                |                                           |                                                                   |
| Radiation                                 | Mo $K_\alpha$ ( $\lambda=0.71073$ Å) |                                           |                                                                   |

7.16. **12b**<sup>o</sup>[0.5 CH<sub>2</sub>Cl<sub>2</sub>; 0.5 MeCN]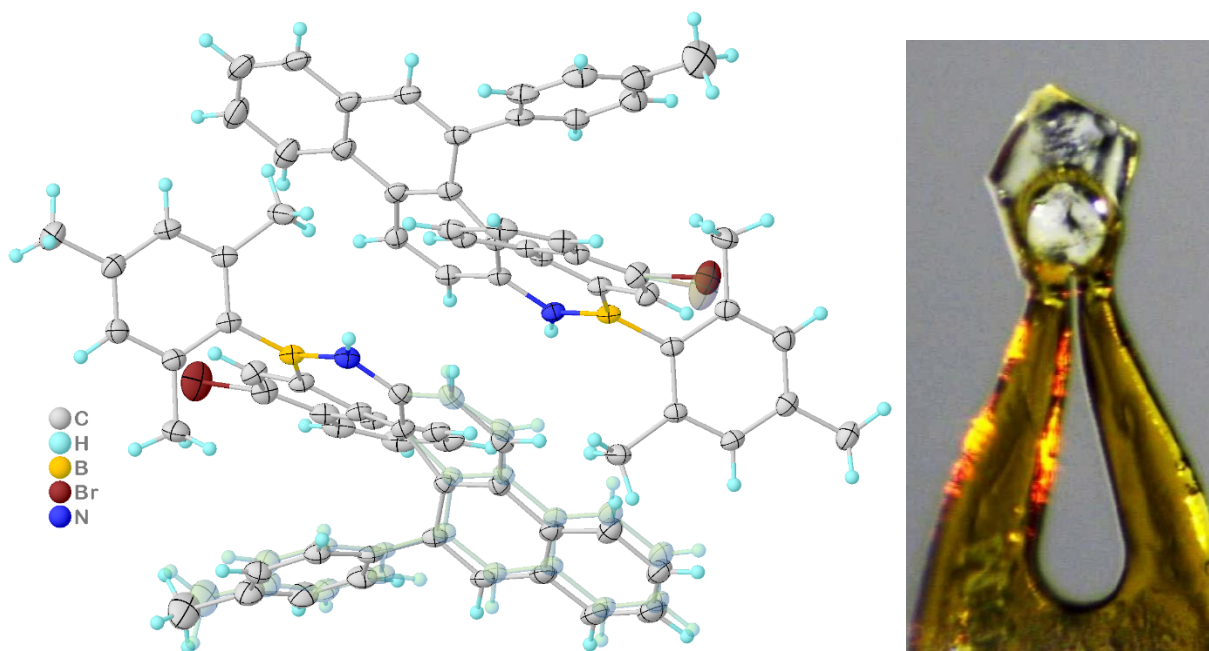

**Figure S54:** Full asymmetric unit of **12b**<sup>o</sup>[0.5 CH<sub>2</sub>Cl<sub>2</sub>; 0.5 MeCN] (*Z'*=2). Anisotropic displacement ellipsoids drawn at 50% probability level; disordered molecule parts in PART 2 drawn in green hue. The co-crystallized solvent molecules are located in a continuous cavity along the *a* axis and could not be modelled; solvent mask was used to remove the unmodelled electron density. Single crystals were obtained from a mixture of dichloromethane and acetonitrile by solvent vapor diffusion method.

|                                        |                                                              |                                                            |                                                                                 |
|----------------------------------------|--------------------------------------------------------------|------------------------------------------------------------|---------------------------------------------------------------------------------|
| CCDC number                            | 2506355                                                      | 2θ range [°]                                               | 4.01 to 57.43 (0.74 Å)                                                          |
| Empirical formula                      | C <sub>41.50</sub> H <sub>33.50</sub> BBrClN <sub>1.50</sub> | Index ranges                                               | -21 ≤ <i>h</i> ≤ 21<br>-11 ≤ <i>k</i> ≤ 17<br>-42 ≤ <i>l</i> ≤ 42               |
| Formula weight                         | 679.37                                                       | Reflections collected                                      | 182183                                                                          |
| Temperature [K]                        | 100.00                                                       | Independent reflections                                    | 17099<br><i>R</i> <sub>int</sub> = 0.0575<br><i>R</i> <sub>sigma</sub> = 0.0313 |
| Crystal system                         | Monoclinic                                                   | Completeness to<br>θ = 25.242°                             | 100.0 %                                                                         |
| Space group (number)                   | <i>P</i> 2 <sub>1</sub> / <i>n</i> (14)                      | Data / Restraints /<br>Parameters                          | 17099 / 391 / 961                                                               |
| <i>a</i> [Å]                           | 16.220(7)                                                    | Absorption correction                                      | 0.5811 / 1.0000<br>(numerical)                                                  |
| <i>b</i> [Å]                           | 13.047(5)                                                    | <i>T</i> <sub>min</sub> / <i>T</i> <sub>max</sub> (method) |                                                                                 |
| <i>c</i> [Å]                           | 31.385(13)                                                   | Goodness-of-fit on <i>F</i> <sup>2</sup>                   | 1.028                                                                           |
| α [°]                                  | 90                                                           | Final <i>R</i> indexes<br>[ <i>I</i> ≥ 2σ( <i>I</i> )]     | <i>R</i> <sub>1</sub> = 0.0499<br><i>wR</i> <sub>2</sub> = 0.1287               |
| β [°]                                  | 90.805(8)                                                    | Final <i>R</i> indexes<br>[all data]                       | <i>R</i> <sub>1</sub> = 0.0693<br><i>wR</i> <sub>2</sub> = 0.1415               |
| γ [°]                                  | 90                                                           | Largest peak/hole<br>[eÅ <sup>-3</sup> ]                   | 1.20/-1.17                                                                      |
| Volume [Å <sup>3</sup> ]               | 6641(5)                                                      |                                                            |                                                                                 |
| <i>Z</i>                               | 8                                                            |                                                            |                                                                                 |
| ρ <sub>calc</sub> [gcm <sup>-3</sup> ] | 1.359                                                        |                                                            |                                                                                 |
| μ [mm <sup>-1</sup> ]                  | 1.351                                                        |                                                            |                                                                                 |
| <i>F</i> (000)                         | 2800                                                         |                                                            |                                                                                 |
| Crystal size [mm <sup>3</sup> ]        | 0.058×0.278×0.417                                            |                                                            |                                                                                 |
| Crystal colour                         | Colourless                                                   |                                                            |                                                                                 |
| Crystal shape                          | Plate                                                        |                                                            |                                                                                 |
| Radiation                              | MoK <sub>α</sub> (λ=0.71073 Å)                               |                                                            |                                                                                 |

7.17. **13b**·1.5 HCCl<sub>3</sub>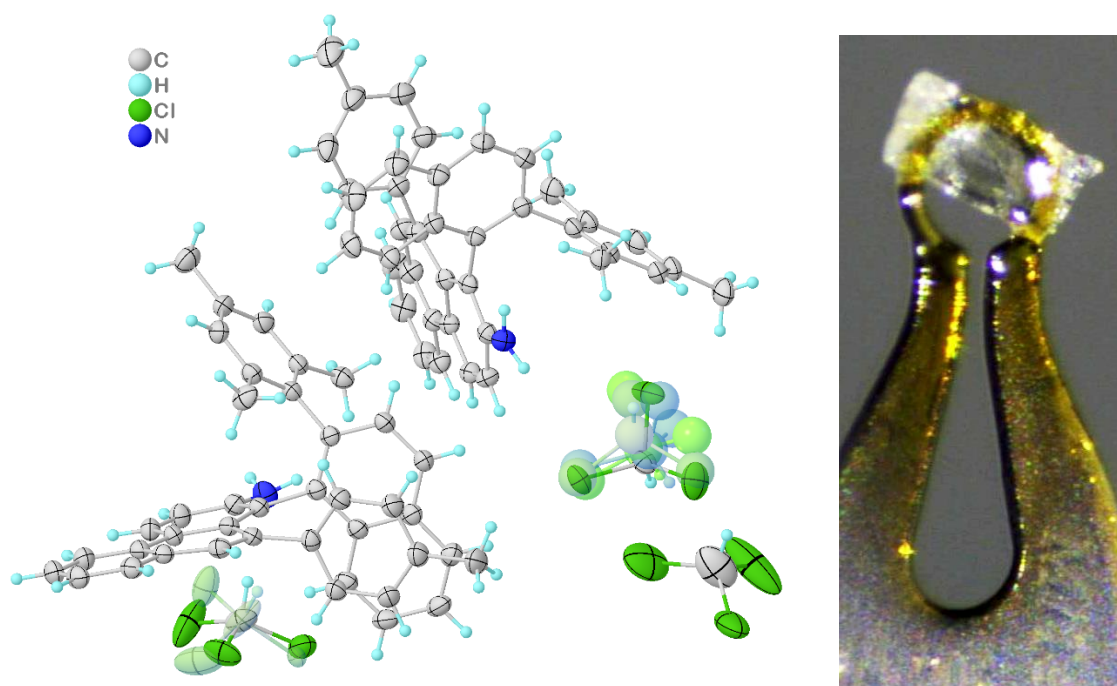

**Figure S55:** Full asymmetric unit of **13b**·1.5 HCCl<sub>3</sub> ( $Z'=2$ ). Anisotropic displacement ellipsoids drawn at 50% probability level; disorder parts are drawn in translucent coloured hues. The co-crystallized chloroform exhibits extensive positional disorder and may even partly escape the lattice, because the refined occupancies converge on a non-integer sum formula. Single crystals were obtained from a solution in chloroform.

|                                           |                                                            |
|-------------------------------------------|------------------------------------------------------------|
| CCDC number                               | 2506356                                                    |
| Empirical formula                         | C <sub>41.08</sub> H <sub>34.08</sub> Cl <sub>3.26</sub> N |
| Formula weight                            | 657.19                                                     |
| Temperature [K]                           | 100.00                                                     |
| Crystal system                            | Orthorhombic                                               |
| Space group (number)                      | $P2_12_12_1$ (19)                                          |
| $a$ [Å]                                   | 11.7361(3)                                                 |
| $b$ [Å]                                   | 20.0189(5)                                                 |
| $c$ [Å]                                   | 28.7963(8)                                                 |
| $\alpha$ [°]                              | 90                                                         |
| $\beta$ [°]                               | 90                                                         |
| $\gamma$ [°]                              | 90                                                         |
| Volume [Å <sup>3</sup> ]                  | 6765.5(3)                                                  |
| $Z$                                       | 8                                                          |
| $\rho_{\text{calc}}$ [gcm <sup>-3</sup> ] | 1.290                                                      |
| $\mu$ [mm <sup>-1</sup> ]                 | 2.862                                                      |
| $F(000)$                                  | 2743                                                       |
| Crystal size [mm <sup>3</sup> ]           | 0.082×0.14×0.327                                           |
| Crystal colour                            | Colourless                                                 |
| Crystal shape                             | Plate                                                      |
| Radiation                                 | CuK $\alpha$ ( $\lambda=1.54178$ Å)                        |

|                                                                   |                                                                      |
|-------------------------------------------------------------------|----------------------------------------------------------------------|
| $2\theta$ range [°]                                               | 5.38 to 158.76 (0.78 Å)                                              |
| Index ranges                                                      | $-14 \leq h \leq 14$<br>$-25 \leq k \leq 22$<br>$-36 \leq l \leq 36$ |
| Reflections collected                                             | 158797                                                               |
| Independent reflections                                           | 14564<br>$R_{\text{int}} = 0.0612$<br>$R_{\text{sigma}} = 0.0266$    |
| Completeness to $\theta = 67.679^\circ$                           | 100.0 %                                                              |
| Data / Restraints / Parameters                                    | 14564 / 187 / 906                                                    |
| Absorption correction<br>$T_{\text{min}}/T_{\text{max}}$ (method) | 0.4894 / 0.8796<br>(numerical)                                       |
| Goodness-of-fit on $F^2$                                          | 1.030                                                                |
| Final $R$ indexes<br>[ $I \geq 2\sigma(I)$ ]                      | $R_1 = 0.0576$<br>$wR_2 = 0.1456$                                    |
| Final $R$ indexes<br>[all data]                                   | $R_1 = 0.0606$<br>$wR_2 = 0.1488$                                    |
| Largest peak/hole<br>[eÅ <sup>-3</sup> ]                          | 0.77/-0.91                                                           |
| Flack X parameter                                                 | -0.007(4)                                                            |

## 8. Computational Details

All geometry optimisations were carried out with Gaussian 16, Rev A03.<sup>[20]</sup> For this purpose, the B3LYP functional<sup>[21]</sup> and Karlsruhe def2-TZVP basis set<sup>[22]</sup> were used. Grimme's D3 correction<sup>[23]</sup> and Becke-Johnson damping<sup>[24]</sup> were included. Solvation effects were accounted for through the polarizable conductor calculation model<sup>[25]</sup> with dichloromethane as solvent. For thermodynamic modelling a temperature of 473.15K was assumed. The rigid-rotor-harmonic-oscillator approximation was used to compute vibrational entropy corrections for all structures.<sup>[26]</sup>

For the theoretical UV-Vis spectra, the simplified TD-DFT (sTD-DFT)<sup>[27]</sup> approach of Bannwarth and Grimme was applied, computed with the ORCA 6.0.1 program package.<sup>[28]</sup> The functional used was the CAM-B3LYP functional.<sup>[29]</sup> The excitation energies were all shifted by -0.4 eV. Such corrections are commonly used in the description of such conjugated systems. The intensities are based on the length gauge of the oscillator strengths.

The absolute energy contributions for calculating  $\Delta G$ ,  $\Delta H$  and  $\Delta S$  are listed in the table below:

|                        | Electronic Energy [kcal/mol] | Zero-Point Energy [kcal/mol] | Thermal Energy [kcal/mol] | Entropy [cal/mol] |
|------------------------|------------------------------|------------------------------|---------------------------|-------------------|
| <i>(M)</i> - <b>14</b> | -797828.95                   | 277.61                       | 35.02                     | 212.44            |
| <i>(M)</i> - <b>1b</b> | -1019107.28                  | 378.52                       | 50.09                     | 277.43            |
| <b>1b</b> TS           | -1019068.38                  | 377.97                       | 49.37                     | 274.94            |
| <i>(M)</i> - <b>2b</b> | -799979.10                   | 276.24                       | 35.39                     | 213.88            |
| <b>2b</b> TS           | -799939.06                   | 275.41                       | 34.77                     | 212.27            |

The computed electronic excitations of **1b**, **2b** and **14** are provided below. The energies (E, in eV) listed are non-shifted (direct sTD-DFT result), the wavelengths ( $\lambda$ , in nm) are computed from the shifted excitation energies.

| <b>1b</b> |                   |          | <b>2b</b> |                   |          | <b>14</b> |                   |          |
|-----------|-------------------|----------|-----------|-------------------|----------|-----------|-------------------|----------|
| E         | $\lambda$ (shift) | $f_L$    | E         | $\lambda$ (shift) | $f_L$    | E         | $\lambda$ (shift) | $f_L$    |
| 3.515     | 398.0             | 0.324505 | 3.557     | 392.7             | 0.029898 | 3.456     | 405.7             | 0.001664 |
| 3.799     | 364.8             | 0.078371 | 3.793     | 365.4             | 0.00484  | 3.675     | 378.6             | 0.085024 |
| 3.918     | 352.4             | 0.025728 | 4.032     | 341.4             | 0.559382 | 3.914     | 352.8             | 0.061847 |
| 4.025     | 342.0             | 0.023748 | 4.145     | 331.1             | 0.093615 | 4.022     | 342.3             | 0.546406 |
| 4.233     | 323.5             | 0.051999 | 4.162     | 329.6             | 0.072431 | 4.078     | 337.1             | 0.042929 |
| 4.363     | 312.9             | 0.283864 | 4.37      | 312.3             | 0.121426 | 4.24      | 322.9             | 0.209581 |
| 4.404     | 309.7             | 0.033272 | 4.423     | 308.2             | 0.16836  | 4.295     | 318.3             | 0.236448 |
| 4.587     | 296.1             | 0.439291 | 4.583     | 296.4             | 0.034112 | 4.502     | 302.3             | 0.611522 |
| 4.639     | 292.5             | 0.048014 | 4.653     | 291.5             | 0.757247 | 4.643     | 292.2             | 0.100805 |
| 4.714     | 287.4             | 0.641757 | 4.74      | 285.7             | 0.041026 | 4.689     | 289.1             | 0.137848 |
| 4.757     | 284.6             | 0.188872 | 4.776     | 283.3             | 0.222168 | 4.771     | 283.7             | 0.028257 |
| 4.818     | 280.6             | 0.051941 | 4.892     | 276.0             | 0.214128 | 4.845     | 278.9             | 0.078098 |
| 4.864     | 277.7             | 0.102019 | 4.932     | 273.6             | 0.057294 | 4.943     | 272.9             | 0.013927 |
| 4.935     | 273.4             | 0.063632 | 5.004     | 269.3             | 0.007744 | 5.044     | 267.0             | 0.054056 |
| 4.99      | 270.1             | 0.020134 | 5.068     | 265.6             | 0.214568 | 5.092     | 264.2             | 0.064119 |
| 5.05      | 266.6             | 0.00581  | 5.088     | 264.5             | 0.078841 | 5.136     | 261.8             | 0.020381 |
| 5.125     | 262.4             | 0.064025 | 5.146     | 261.2             | 0.07331  | 5.154     | 260.8             | 0.089886 |
| 5.141     | 261.5             | 0.09924  | 5.222     | 257.1             | 0.037699 | 5.188     | 258.9             | 0.029653 |
| 5.216     | 257.4             | 0.022199 | 5.268     | 254.7             | 0.027893 | 5.241     | 256.1             | 0.232253 |
| 5.278     | 254.2             | 0.068933 | 5.357     | 250.1             | 0.0789   | 5.332     | 251.4             | 0.122102 |
| 5.297     | 253.2             | 0.139762 | 5.432     | 246.4             | 0.057426 | 5.372     | 249.4             | 0.051611 |

### *XYZ Structures and Gibbs free energies*

System (M) - **14**

G=-797613.07 kcal/mol

|   |              |              |              |
|---|--------------|--------------|--------------|
| C | 2.885657000  | 0.045671000  | 1.439704000  |
| C | 1.499375000  | 0.333316000  | 1.299806000  |
| C | -0.264243000 | 1.650895000  | 0.018063000  |
| C | -1.255230000 | 0.612671000  | -0.162233000 |
| C | -0.917170000 | -0.759346000 | -0.485202000 |
| C | 0.426365000  | -1.162292000 | -0.969154000 |
| C | 1.033082000  | -2.333654000 | -0.514735000 |
| H | 0.535262000  | -2.932405000 | 0.235283000  |
| C | 2.290857000  | -2.708739000 | -0.963537000 |
| H | 2.747715000  | -3.609430000 | -0.571239000 |
| C | 2.987674000  | -1.932182000 | -1.887706000 |
| C | 2.362752000  | -0.782826000 | -2.373213000 |
| H | 2.870784000  | -0.170296000 | -3.108632000 |
| C | 1.106595000  | -0.404288000 | -1.925721000 |
| H | 0.651983000  | 0.496371000  | -2.315430000 |
| C | -1.899596000 | -1.707145000 | -0.470789000 |
| H | -1.652959000 | -2.726118000 | -0.740724000 |
| C | -3.258644000 | -1.404645000 | -0.190890000 |
| C | -3.644833000 | -0.046156000 | -0.064342000 |
| C | -2.623759000 | 0.976087000  | -0.131222000 |
| C | -2.972428000 | 2.350696000  | -0.224058000 |
| H | -4.012550000 | 2.638109000  | -0.245860000 |
| C | -2.017211000 | 3.304366000  | -0.399549000 |
| H | -2.295769000 | 4.332718000  | -0.592665000 |
| C | -0.641767000 | 2.980918000  | -0.293054000 |
| C | 0.356632000  | 3.968185000  | -0.513374000 |
| H | 0.044640000  | 4.964875000  | -0.798933000 |
| C | 1.674968000  | 3.646373000  | -0.421672000 |
| H | 2.442026000  | 4.368839000  | -0.670703000 |
| C | -5.011260000 | 0.238917000  | 0.140209000  |
| H | -5.340821000 | 1.260703000  | 0.257220000  |
| C | -5.945038000 | -0.769584000 | 0.225855000  |
| H | -6.984964000 | -0.523815000 | 0.397188000  |
| C | -5.556691000 | -2.112965000 | 0.096215000  |
| H | -6.297440000 | -2.899201000 | 0.160983000  |
| C | -4.233744000 | -2.421027000 | -0.113320000 |
| H | -3.919486000 | -3.451821000 | -0.221920000 |
| C | 0.591697000  | -0.414391000 | 2.079983000  |
| H | -0.455720000 | -0.156897000 | 2.066451000  |

|   |             |              |              |
|---|-------------|--------------|--------------|
| C | 1.016015000 | -1.457234000 | 2.868918000  |
| H | 0.296698000 | -2.008803000 | 3.460313000  |
| C | 2.374883000 | -1.808707000 | 2.913223000  |
| H | 2.699241000 | -2.646324000 | 3.516866000  |
| C | 3.291832000 | -1.056953000 | 2.219385000  |
| H | 4.349220000 | -1.282254000 | 2.285369000  |
| C | 4.381905000 | -2.296127000 | -2.316085000 |
| H | 5.122158000 | -1.804314000 | -1.677862000 |
| H | 4.578336000 | -1.982070000 | -3.341990000 |
| H | 4.552504000 | -3.370827000 | -2.245254000 |
| C | 3.846566000 | 0.918779000  | 0.853691000  |
| C | 3.452082000 | 2.078132000  | 0.268366000  |
| H | 4.897416000 | 0.676098000  | 0.950657000  |
| H | 4.182820000 | 2.793009000  | -0.089106000 |
| C | 1.090278000 | 1.430665000  | 0.452715000  |
| C | 2.070547000 | 2.381562000  | 0.092054000  |

System (M)-1b

G=-1018806.18 kcal/mol

74

|   |               |               |               |
|---|---------------|---------------|---------------|
| C | 3.204188163   | -0.7440830053 | -1.6735753597 |
| C | 1.8010640316  | -0.8533019566 | -1.4453199325 |
| C | 1.3345122499  | -1.7299137082 | -0.4018887766 |
| C | -0.042215932  | -1.7108720797 | 0.0818503829  |
| C | -0.8776209699 | -0.5392444502 | 0.1383410259  |
| C | -0.3443656617 | 0.8082665357  | 0.2324438943  |
| C | 1.0652548362  | 1.0888264719  | 0.6001783739  |
| C | 1.7951165757  | 2.0819489755  | -0.0537764898 |
| H | 1.3386124686  | 2.6257604236  | -0.8692465147 |
| C | 3.1168557762  | 2.3362548989  | 0.2816467228  |
| H | 3.6668980616  | 3.0933017666  | -0.2644382502 |
| C | 3.7579922223  | 1.6128125115  | 1.2858599063  |
| C | 3.0143481551  | 0.6499471849  | 1.9689807154  |
| H | 3.4795880319  | 0.0845551921  | 2.7677715271  |
| C | 1.6937116649  | 0.3930295651  | 1.6364231794  |
| H | 1.1475225548  | -0.3678289589 | 2.1768668707  |
| C | -1.1917974183 | 1.8701902536  | 0.1081175894  |
| H | -0.7959345412 | 2.8728165707  | 0.20940734    |
| C | -2.5947262832 | 1.7266950311  | -0.0687318676 |

|   |               |               |               |
|---|---------------|---------------|---------------|
| C | -3.1655031861 | 0.4333269981  | 0.0274650366  |
| C | -2.2869150295 | -0.7033809934 | 0.208649304   |
| C | -2.8042964192 | -1.9873441816 | 0.4920204196  |
| H | -3.8700646231 | -2.1312411651 | 0.5835861069  |
| C | -1.974343623  | -3.0423226116 | 0.7461208181  |
| H | -2.3766785459 | -3.9962430993 | 1.0639948373  |
| C | -0.5845469668 | -2.9134796171 | 0.5662880004  |
| H | -0.2303560007 | -4.7871691681 | 1.2461502625  |
| C | -4.5670502099 | 0.3191520379  | -0.0781155218 |
| H | -5.0383573795 | -0.6513728164 | -0.0266937774 |
| C | -5.3608143401 | 1.4275461311  | -0.277216678  |
| H | -6.4328058563 | 1.3088845567  | -0.3674309002 |
| C | -4.7894224461 | 2.7066264419  | -0.3679640977 |
| H | -5.4200846222 | 3.5725194743  | -0.5213059906 |
| C | -3.4262199174 | 2.8494599864  | -0.2604746411 |
| H | -2.9694402525 | 3.8297192212  | -0.3216509639 |
| C | 0.9340856987  | -0.1495868055 | -2.3122854285 |
| H | -0.1321073401 | -0.2833532949 | -2.2169688882 |
| C | 1.4216131832  | 0.6907987459  | -3.2819622488 |
| H | 0.7349673568  | 1.2117697234  | -3.9365532592 |
| C | 2.808266611   | 0.8776103011  | -3.4307875605 |
| H | 3.183933324   | 1.5615901708  | -4.1808232329 |
| C | 3.678578195   | 0.1621998137  | -2.6485540947 |
| H | 4.7485418501  | 0.2606311064  | -2.7851295671 |
| C | 5.2137328948  | 1.8280058694  | 1.5924354926  |
| H | 5.8347226446  | 1.1351148362  | 1.0165985654  |
| H | 5.4288398239  | 1.655429165   | 2.6477799844  |
| H | 5.5297026348  | 2.8398273584  | 1.3365966926  |
| N | 0.2433530615  | -3.9727184129 | 0.8830113924  |
| B | 1.6564068669  | -3.9043370799 | 0.8546037251  |
| C | 2.5315217409  | -5.0597371081 | 1.454102197   |
| C | 3.1159411082  | -4.8974440127 | 2.7222013559  |
| C | 2.7820024673  | -6.2398632052 | 0.7362870854  |
| C | 3.9164367791  | -5.9064136086 | 3.2524425601  |
| C | 3.5910495884  | -7.2306359043 | 1.2906265129  |
| C | 4.1632401496  | -7.085065907  | 2.551680235   |
| H | 4.3623511333  | -5.7683182362 | 4.2315912832  |
| H | 3.7842232066  | -8.1342152726 | 0.7225357279  |
| C | 2.1917252848  | -6.436686983  | -0.637777203  |

|   |              |               |               |
|---|--------------|---------------|---------------|
| H | 1.1057124461 | -6.5495164364 | -0.5930842051 |
| H | 2.3946767896 | -5.5782992174 | -1.2824712761 |
| H | 2.5993892184 | -7.3256957369 | -1.1186680878 |
| C | 2.8855632292 | -3.6287915667 | 3.5049005445  |
| H | 3.2577575836 | -2.756888122  | 2.9611610187  |
| H | 1.8208008191 | -3.4582039682 | 3.6822987428  |
| H | 3.3866674935 | -3.6635368076 | 4.4719874373  |
| C | 5.0065414636 | -8.1781222259 | 3.1509266597  |
| H | 5.7861006406 | -7.7698461746 | 3.7955488568  |
| H | 4.3976580435 | -8.8499083253 | 3.7629020569  |
| H | 5.4810200555 | -8.7826103499 | 2.3770927891  |
| C | 2.2219445266 | -2.6794448253 | 0.1242393032  |
| C | 3.6088185594 | -2.5689022064 | -0.1536817261 |
| C | 4.0975344087 | -1.5869125397 | -0.963418018  |
| H | 5.1620235115 | -1.479012987  | -1.1322081389 |

System **1b** Transition State

G=-1018767.37 kcal/mol

74

|   |              |              |              |
|---|--------------|--------------|--------------|
| C | 0.315269000  | -2.071078000 | 2.311369000  |
| C | -0.217752000 | -1.671431000 | 1.043025000  |
| C | 0.405433000  | -0.573989000 | 0.332198000  |
| C | -0.224341000 | 0.415521000  | -0.587977000 |
| C | -1.537144000 | 1.024670000  | -0.385236000 |
| C | -2.760481000 | 0.394901000  | 0.106349000  |
| C | -3.283639000 | -0.863564000 | -0.473464000 |
| C | -3.049976000 | -1.140339000 | -1.823126000 |
| H | -2.403012000 | -0.489268000 | -2.395581000 |
| C | -3.628987000 | -2.242816000 | -2.437748000 |
| H | -3.423353000 | -2.435024000 | -3.484031000 |
| C | -4.476290000 | -3.099263000 | -1.736608000 |
| C | -4.734456000 | -2.800027000 | -0.396488000 |
| H | -5.387452000 | -3.448009000 | 0.176431000  |
| C | -4.152463000 | -1.707835000 | 0.222919000  |
| H | -4.344076000 | -1.529986000 | 1.272702000  |
| C | -3.667889000 | 1.149184000  | 0.796480000  |
| H | -4.583867000 | 0.684197000  | 1.136470000  |
| C | -3.586648000 | 2.565173000  | 0.880539000  |
| C | -2.670711000 | 3.209933000  | 0.014317000  |

|   |              |              |              |
|---|--------------|--------------|--------------|
| C | -1.682513000 | 2.407742000  | -0.680084000 |
| C | -0.821671000 | 2.993916000  | -1.632437000 |
| H | -1.019621000 | 3.989210000  | -2.000688000 |
| C | 0.268973000  | 2.317950000  | -2.082497000 |
| H | 0.943871000  | 2.767647000  | -2.799640000 |
| C | 0.653254000  | 1.126645000  | -1.435946000 |
| H | 2.496469000  | 1.263354000  | -2.268742000 |
| C | 1.764217000  | -0.365378000 | 0.636415000  |
| C | -2.710152000 | 4.616034000  | -0.063242000 |
| H | -2.016386000 | 5.145894000  | -0.699491000 |
| C | -3.600384000 | 5.345809000  | 0.696264000  |
| H | -3.600189000 | 6.425967000  | 0.629001000  |
| C | -4.497897000 | 4.700283000  | 1.560177000  |
| H | -5.192685000 | 5.281328000  | 2.152337000  |
| C | -4.492955000 | 3.326606000  | 1.643207000  |
| H | -5.193065000 | 2.811490000  | 2.289438000  |
| C | -1.164885000 | -2.529883000 | 0.456113000  |
| H | -1.441602000 | -2.368989000 | -0.568927000 |
| C | -1.679815000 | -3.613645000 | 1.130170000  |
| H | -2.385404000 | -4.263393000 | 0.632101000  |
| C | -1.297480000 | -3.873591000 | 2.454207000  |
| H | -1.737075000 | -4.701486000 | 2.995506000  |
| C | -0.304891000 | -3.117216000 | 3.028666000  |
| H | 0.078149000  | -3.366204000 | 4.010734000  |
| C | -5.079709000 | -4.312891000 | -2.387329000 |
| H | -4.981342000 | -4.270561000 | -3.471963000 |
| H | -4.585604000 | -5.226185000 | -2.044393000 |
| H | -6.138973000 | -4.409108000 | -2.142164000 |
| N | 1.994567000  | 0.796897000  | -1.527353000 |
| B | 2.680133000  | 0.228243000  | -0.436604000 |
| C | 4.247388000  | 0.177352000  | -0.395125000 |
| C | 4.940207000  | -1.002936000 | -0.715583000 |
| C | 4.979029000  | 1.312171000  | -0.009467000 |
| C | 6.331366000  | -1.027625000 | -0.656801000 |
| C | 6.370958000  | 1.255126000  | 0.047099000  |
| C | 7.066295000  | 0.092714000  | -0.273549000 |
| H | 6.855016000  | -1.942181000 | -0.913739000 |
| H | 6.924375000  | 2.137800000  | 0.348793000  |
| C | 4.183846000  | -2.242162000 | -1.122994000 |

|   |             |              |              |
|---|-------------|--------------|--------------|
| C | 4.266541000 | 2.592903000  | 0.348568000  |
| H | 3.555206000 | -2.055808000 | -1.996966000 |
| H | 4.863945000 | -3.058677000 | -1.364500000 |
| H | 3.520693000 | -2.578617000 | -0.322379000 |
| H | 3.790972000 | 3.043263000  | -0.526350000 |
| H | 3.476064000 | 2.416031000  | 1.081897000  |
| H | 4.957256000 | 3.325196000  | 0.766085000  |
| C | 8.567352000 | 0.035289000  | -0.180762000 |
| H | 9.006602000 | 1.031542000  | -0.238954000 |
| H | 8.883352000 | -0.408562000 | 0.767641000  |
| H | 8.991282000 | -0.574956000 | -0.979751000 |
| C | 1.560612000 | -1.548592000 | 2.746844000  |
| C | 2.309063000 | -0.836830000 | 1.860657000  |
| H | 3.339226000 | -0.588599000 | 2.083952000  |

System (M)-2b

G=-799764.91 kcal/mol

55

|   |               |               |               |
|---|---------------|---------------|---------------|
| C | 3.3753807939  | -0.5440450604 | -0.8003022017 |
| C | 1.9740920454  | -0.6983637582 | -0.6635204592 |
| C | 0.1099209797  | -1.3216720073 | 0.8001752185  |
| C | -0.6759957824 | -0.1275494394 | 0.6568284989  |
| C | -0.1129955051 | 1.2087815146  | 0.5837944593  |
| C | 1.2754497928  | 1.5279008349  | 0.9934737033  |
| C | 2.04714411    | 2.4331583352  | 0.2622992828  |
| H | 1.6496647499  | 2.851279598   | -0.6522753413 |
| C | 3.335439941   | 2.7566759378  | 0.6585536618  |
| H | 3.9200618952  | 3.4419921188  | 0.0565557446  |
| C | 3.9017425576  | 2.1912275142  | 1.8001593217  |
| C | 3.1179703234  | 1.312414364   | 2.5483000108  |
| H | 3.5264484806  | 0.8688021139  | 3.4484086638  |
| C | 1.8295539033  | 0.9863350534  | 2.1558430468  |
| H | 1.2467150722  | 0.3001997362  | 2.7560431427  |
| C | -0.9249550556 | 2.2529595697  | 0.2524709865  |
| H | -0.5111821304 | 3.2529255509  | 0.2319721948  |
| C | -2.3173181663 | 2.1083035376  | 0.0096009055  |
| C | -2.9266457568 | 0.8535956951  | 0.2545131354  |
| C | -2.0930827793 | -0.2625441913 | 0.6522694499  |
| C | -2.6702205918 | -1.4850079036 | 1.0636094509  |

|   |               |               |               |
|---|---------------|---------------|---------------|
| H | -3.743271692  | -1.5895116996 | 1.1019336519  |
| C | -1.8855223811 | -2.511422986  | 1.5022205541  |
| H | -2.3329475855 | -3.4032226588 | 1.9224550658  |
| C | -0.4805999371 | -2.4551848969 | 1.3917436242  |
| C | 0.3247186955  | -3.512059007  | 1.9402159523  |
| H | -0.2103552098 | -4.3441287131 | 2.3878792228  |
| C | 1.6739879851  | -3.4226967021 | 1.9713981979  |
| H | 2.2424892808  | -4.1965163693 | 2.4756036335  |
| C | -4.3216974389 | 0.7490684802  | 0.076531804   |
| H | -4.8213568872 | -0.1942778371 | 0.2387014099  |
| C | -5.071884018  | 1.8297864608  | -0.3318840851 |
| H | -6.1390889125 | 1.718196609   | -0.4723974252 |
| C | -4.4617760617 | 3.0713634337  | -0.5698508121 |
| H | -5.0586144029 | 3.9163219163  | -0.8873598006 |
| C | -3.1046734627 | 3.205406909   | -0.3960990482 |
| H | -2.6192114944 | 4.1580474989  | -0.568650777  |
| C | 1.1431762127  | -0.2134042132 | -1.6833348117 |
| H | 0.0827545073  | -0.4026712441 | -1.6473472958 |
| C | 1.6639588317  | 0.5030085272  | -2.7420453103 |
| H | 0.9972898555  | 0.8651910064  | -3.5136905466 |
| C | 3.0359240796  | 0.7546096844  | -2.8245430246 |
| H | 3.4380630224  | 1.3352424594  | -3.6439075546 |
| C | 3.8724650796  | 0.216957987   | -1.8709309785 |
| H | 4.9441641142  | 0.3547889875  | -1.9432713022 |
| C | 5.3241760237  | 2.4822711261  | 2.1897028767  |
| H | 5.999043968   | 1.7262618568  | 1.7773279933  |
| H | 5.4505344613  | 2.472837996   | 3.2730882301  |
| H | 5.6498523241  | 3.452067071   | 1.8124306188  |
| C | 4.2849852056  | -1.2174947808 | 0.0853355668  |
| C | 3.8431153893  | -2.134270594  | 0.9737156602  |
| H | 5.3413002114  | -1.0038722588 | -0.0474503936 |
| H | 4.5659535557  | -2.6864582409 | 1.5648114002  |
| N | 1.4642449792  | -1.4094723492 | 0.4398466178  |
| B | 2.345004614   | -2.3246820327 | 1.1594747898  |

System **2b** Transition State

G=-799725.56 kcal/mol

55

|   |              |             |              |
|---|--------------|-------------|--------------|
| C | -1.975052000 | 2.131381000 | -1.841106000 |
|---|--------------|-------------|--------------|

|   |              |              |              |
|---|--------------|--------------|--------------|
| C | -1.661525000 | 1.449004000  | -0.635542000 |
| C | 0.298298000  | 1.329974000  | 0.964213000  |
| C | 0.988833000  | 0.140628000  | 0.485891000  |
| C | 0.458672000  | -1.013071000 | -0.238497000 |
| C | -0.718322000 | -1.767431000 | 0.253105000  |
| C | -0.982021000 | -1.807851000 | 1.624211000  |
| H | -0.388447000 | -1.206098000 | 2.299346000  |
| C | -2.000902000 | -2.602852000 | 2.134140000  |
| H | -2.186558000 | -2.605394000 | 3.201520000  |
| C | -2.779931000 | -3.402337000 | 1.300530000  |
| C | -2.494167000 | -3.381747000 | -0.067659000 |
| H | -3.087251000 | -3.986536000 | -0.743745000 |
| C | -1.487144000 | -2.584339000 | -0.581309000 |
| H | -1.322202000 | -2.563279000 | -1.650162000 |
| C | 1.273403000  | -1.682164000 | -1.106852000 |
| H | 0.893241000  | -2.558968000 | -1.613786000 |
| C | 2.671383000  | -1.435739000 | -1.188917000 |
| C | 3.252983000  | -0.659208000 | -0.157305000 |
| C | 2.386403000  | 0.074796000  | 0.746712000  |
| C | 2.919277000  | 0.754217000  | 1.863969000  |
| H | 3.940370000  | 0.580789000  | 2.167042000  |
| C | 2.141969000  | 1.627179000  | 2.558917000  |
| H | 2.532442000  | 2.145462000  | 3.424944000  |
| C | 0.897381000  | 2.039590000  | 2.032128000  |
| C | 0.451331000  | 3.343104000  | 2.446004000  |
| H | 0.853889000  | 3.717977000  | 3.381986000  |
| C | -0.264876000 | 4.120380000  | 1.606770000  |
| H | -0.454464000 | 5.156514000  | 1.864316000  |
| C | 4.657255000  | -0.566390000 | -0.106995000 |
| H | 5.135127000  | 0.031628000  | 0.654873000  |
| C | 5.446008000  | -1.196596000 | -1.046577000 |
| H | 6.522314000  | -1.096753000 | -0.995388000 |
| C | 4.862651000  | -1.956547000 | -2.071010000 |
| H | 5.488761000  | -2.447969000 | -2.804175000 |
| C | 3.493025000  | -2.078401000 | -2.134201000 |
| H | 3.029156000  | -2.678581000 | -2.907186000 |
| C | -2.463663000 | 0.376954000  | -0.261738000 |
| H | -2.368191000 | -0.024042000 | 0.731121000  |
| C | -3.417073000 | -0.140416000 | -1.124992000 |

|   |              |              |              |
|---|--------------|--------------|--------------|
| H | -4.029791000 | -0.968254000 | -0.798628000 |
| C | -3.584016000 | 0.401966000  | -2.395609000 |
| H | -4.306156000 | -0.019280000 | -3.082340000 |
| C | -2.878933000 | 1.542731000  | -2.735581000 |
| H | -3.082787000 | 2.052587000  | -3.669082000 |
| N | -0.721256000 | 2.018931000  | 0.258344000  |
| B | -0.755426000 | 3.482899000  | 0.322210000  |
| C | -1.180739000 | 4.223021000  | -0.948097000 |
| C | -1.592219000 | 3.510980000  | -2.018294000 |
| H | -1.041380000 | 5.294728000  | -1.044153000 |
| H | -1.786044000 | 3.963643000  | -2.985683000 |
| C | -3.884036000 | -4.265800000 | 1.844390000  |
| H | -4.832556000 | -4.052344000 | 1.346541000  |
| H | -3.669783000 | -5.325560000 | 1.685003000  |
| H | -4.019293000 | -4.107380000 | 2.913979000  |

## 9. References

- [1] W. Fu, V. Pelliccioli, M. von Geyso, P. Redero, C. Böhmer, M. Simon, C. Golz, M. Alcarazo, *Adv. Mater.* 2023, **35**, e2211279.
- [2] P. Redero, T. Hartung, J. Zhang, L. D. M. Nicholls, G. Zichen, M. Simon, C. Golz, M. Alcarazo, *Angew. Chem. Int. Ed.* 2020, **59**, 23527–23531.
- [3] L. D. M. Nicholls, M. Marx, T. Hartung, E. González-Fernández, C. Golz, M. Alcarazo, *ACS Catal.* 2018, **8**, 6079–6085.
- [4] G. M. Sheldrick, *Acta Cryst.* 2008, **64**, 112–122.
- [5] O. V. Dolomanov, L. J. Bourhis, R. J. Gildea, J. Howard, H. Puschmann, *J. Appl. Cryst.* 2009, **42**, 339–341.
- [6] E. Sans-Panadés, J. J. Vaquero, M. A. Fernández-Rodríguez, P. García-García, *Org. Lett.* 2022, **24**, 5860–5865.
- [7] R. P. Alexander, et al., Fused Thiazole Derivatives as Kinase Inhibitors, U.S. Patent 8,242,116, 14 August 2012.
- [8] A. Abengózar, P. García-García, D. Sucunza, A. Pérez-Redondo, J. J. Vaquero, *Chem. Commun.* 2018, **54**, 2467–2470.
- [9] K. A. Asserese, H. Huang, *Org. Lett.* 2023, **25**, 1109–1113.
- [10] A. C. Shaikh, D. S. Ranade, P. R. Rajamohanan, P. P. Kulkarni, N. T. Patil, *Angew. Chem. Int. Ed.* 2017, **56**, 757–761.
- [11] C. Körner, P. Starkov, T. D. Sheppard, *J. Am. Chem. Soc.* 2010, **132**, 5968–5969.
- [12] M. Chen, N. Su, T. Deng, D. J. Wink, Y. Zhao, T. G. Driver, *Org. Lett.* 2019, **21**, 1555–1558.
- [13] K. Naveen, P. T. Perumal, D.-H. Cho, *Org. Lett.* 2019, **21**, 4350–4354.
- [14] A. K. Verma, R. R. Jha, R. Chaudhary, R. K. Tiwari, K. S. K. Reddy, A. Danodia, *J. Org. Chem.* 2012, **77**, 8191–8205.
- [15] R. D. Mule, A. C. Shaikh, A. B. Gade, N. T. Patil, *Chem. Commun.* 2018, **54**, 11909–11912.
- [16] S. Suárez-Pantiga, P. Redero, X. Aniban, M. Simon, C. Golz, R. A. Mata, M. Alcarazo, *Chem. Eur. J.* 2021, **27**, 13358–13366.
- [17] A. Krasovskiy, P. Knochel, *Synthesis* 2006, 890–891.

- [18] T. Tamai, K. Fujiwara, S. Higashimae, A. Nomoto, A. Ogawa, *Org. Lett.* 2016, **18**, 2114–2117.
- [19] F. Kleemiss, O. V. Dolomanov, M. Bodensteiner, N. Peyerimhoff, L. Midgley, L. J. Bourhis, A. Genoni, L. A. Malaspina, D. Jayatilaka, J. L. Spencer, F. White, B. Grundkötter-Stock, S. Steinhauer, D. Lentz, H. Puschmann, S. Grabowsky, *Chem. Sci.* 2020, **12**, 1675–1692.
- [20] M. J. Frisch, G. W. Trucks, H. B. Schlegel, G. E. Scuseria, M. A. Robb, J. R. Cheeseman, G. Scalmani, V. Barone, G. A. Petersson, H. Nakatsuji, X. Li, M. Caricato, A. V. Marenich, J. Bloino, B. G. Janesko, R. Gomperts, B. Mennucci, H. P. Hratchian, J. V. Ortiz, A. F. Izmaylov, J. L. Sonnenberg, D. Williams-Young, F. Ding, F. Lipparini, F. Egidi, J. Goings, B. Peng, A. Petrone, T. Henderson, D. Ranasinghe, V. G. Zakrzewski, J. Gao, N. Rega, G. Zheng, W. Liang, M. Hada, M. Ehara, K. Toyota, R. Fukuda, J. Hasegawa, M. Ishida, T. Nakajima, Y. Honda, O. Kitao, H. Nakai, T. Vreven, K. Throssell, J. A. Montgomery, Jr., J. E. Peralta, F. Ogliaro, M. J. Bearpark, J. J. Heyd, E. N. Brothers, K. N. Kudin, V. N. Staroverov, T. A. Keith, R. Kobayashi, J. Normand, K. Raghavachari, A. P. Rendell, J. C. Burant, S. S. Iyengar, J. Tomasi, M. Cossi, J. M. Millam, M. Klene, C. Adamo, R. Cammi, J. W. Ochterski, R. L. Martin, K. Morokuma, O. Farkas, J. B. Foresman, D. J. Fox, *Gaussian 16*, Revision C.01, Gaussian, Inc., Wallingford, CT, 2016.
- [21] A. D. Becke, *J. Chem. Phys.* 1993, **98**, 5648–5652.
- [22] F. Weigend, R. Ahlrichs, *Phys. Chem. Chem. Phys.* 2005, **7**, 3297–3305.
- [23] S. Grimme, J. Antony, S. Ehrlich, H. Krieg, *J. Chem. Phys.* 2010, **132**, 154104.
- [24] S. Grimme, S. Ehrlich, L. Goerigk, *J. Comput. Chem.* 2011, **32**, 1456–1465.
- [25] a) V. Barone, M. Cossi, *J. Phys. Chem. A* 1998, **102**, 1995–2001. b) M. Cossi, N. Rega, G. Scalmani, V. Barone, *J. Comput. Chem.* 2003, **24**, 669–681.
- [26] S. Grimme, *Chem. Eur. J.* 2012, **18**, 9955–9964.
- [27] C. Bannwarth, S. Grimme, *Comput. Theor. Chem.* 2014, **1040–1041**, 45–53.
- [28] F. Neese, *WIREs Comput. Mol. Sci.* 2025, **15**, e70019.
- [29] T. Yanai, D. P. Tew, N. C. Handy, *Chem. Phys. Lett.* 2004, **393**, 51–57.
